# Supplementary material for: Zn-Catalyzed enantioselective allylation and allenylation of isatins by virtue of a proline-derived chiral ligand
Source: Royal Society of Chemistry journal article supplement (doi:10.1039/d1cc06563g), 2022-01-01
Supplement: d1cc06563g1.pdf [file d1cc06563g1.pdf]

## Supporting Information

### Table of Contents

|                                               |     |
|-----------------------------------------------|-----|
| Part I Experimental Section.....              | 2   |
| 1.1 General information .....                 | 2   |
| 1.2 Optimization of reaction conditions ..... | 3   |
| 1.3 General working procedure .....           | 4   |
| 1.4 Experimental date of products.....        | 7   |
| 1.5 NMR experiment and DFT calculations ..... | 21  |
| Part II NMR spectra .....                     | 88  |
| Part III HPLC Spectra .....                   | 132 |

## Part I Experimental Section

### 1.1 General information

<sup>1</sup>H NMR and <sup>13</sup>C NMR were recorded on Bruker-400 MHz Spectrometer (<sup>1</sup>H NMR: 400MHz, <sup>13</sup>C NMR: 100MHz, <sup>19</sup>F NMR: 376MHz) and Bruker-500 MHz Spectrometer (<sup>1</sup>H NMR: 500MHz, <sup>13</sup>C NMR: 125MHz, <sup>19</sup>F NMR: 470MHz) using TMS as internal reference. The chemical shifts ( $\delta$ ) and coupling constants ( $J$ ) were expressed in ppm and Hz respectively. HPLC analysis was carried out on Agilent 1260 series HPLC with a multiple wavelength detector. Chiralpak IC, AS-H, OD-H, OJ-H, AD-H were purchased from Daicel Chemical Industries, LTD. Optical rotations were measured on a PerKinElmer<sup>TM</sup> Polarimeter (Model 343). Commercially available compounds were used without further purification. All solvents were purified according to the standard procedures unless otherwise noted. Ligands **L**<sup>[1]</sup> and isatins<sup>[2]</sup> were prepared according to the literature procedures.

## 1.2 Optimization of reaction conditions

**Table 1.** Optimization of reaction conditions of allylation of isatins<sup>a</sup>

Reaction scheme: 1a + 2a  $\xrightarrow[\text{Acetone, 10}^\circ\text{C}]{\text{Metal salt (10 mol \%), L}_1 \text{ (10 mol \%), Base}}$  3aa

| Entry | Metal salt           | Base                            | Amount of base | Yield <sup>b</sup> (%) | ee <sup>c</sup> (%) |
|-------|----------------------|---------------------------------|----------------|------------------------|---------------------|
| 1     | Cu(OTf) <sub>2</sub> | Et <sub>3</sub> N               | 10%            | Trace                  | --                  |
| 2     | Zn(OTf) <sub>2</sub> | Et <sub>3</sub> N               | 10%            | 98                     | 73                  |
| 3     | Zn(OTf) <sub>2</sub> | Li <sub>2</sub> CO <sub>3</sub> | 10%            | 98                     | 24                  |
| 4     | Zn(OTf) <sub>2</sub> | Cs <sub>2</sub> CO <sub>3</sub> | 10%            | 98                     | 83                  |
| 5     | Zn(OTf) <sub>2</sub> | Na <sub>2</sub> CO <sub>3</sub> | 10%            | 99                     | 32                  |
| 6     | Zn(OTf) <sub>2</sub> | <i>t</i> -BuOK                  | 10%            | 99                     | 39                  |
| 7     | Zn(OTf) <sub>2</sub> | DABCO                           | 10%            | 98                     | 63                  |
| 8     | Zn(OTf) <sub>2</sub> | DIPEA                           | 10%            | 97                     | 32                  |
| 9     | Zn(OTf) <sub>2</sub> | DBU                             | 10%            | 98                     | 51                  |
| 10    | Zn(OTf) <sub>2</sub> | N-Ethylmorpholin                | 10%            | 98                     | 52                  |
| 11    | Zn(OTf) <sub>2</sub> | Cs <sub>2</sub> CO <sub>3</sub> | 5%             | 99                     | 79                  |
| 12    | Zn(OTf) <sub>2</sub> | Cs <sub>2</sub> CO <sub>3</sub> | 15%            | 99                     | 75                  |
| 13    | Zn(OTf) <sub>2</sub> | Cs <sub>2</sub> CO <sub>3</sub> | 20%            | 99                     | 68                  |

<sup>a</sup>Unless otherwise noted, the reaction of **1a** (0.1 mmol) and **2a** (0.25 mmol) was performed in the presence of **L**<sub>1</sub> (10 mol %), base, metal salt (10 mol %) in acetone (1.0 mL). <sup>b</sup>Isolated yield.

<sup>c</sup>Determined by chiral HPLC analysis.

**Table 2.** Optimization of reaction conditions of allenylation of isatins<sup>a</sup>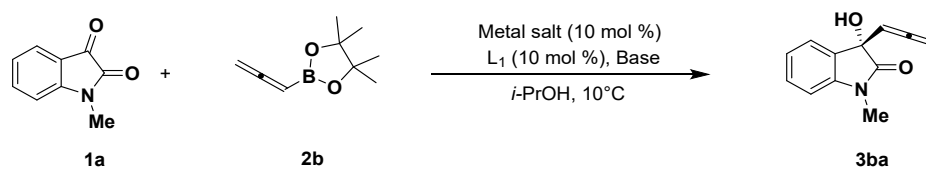

| Entry | Metal salt           | Base                            | Yield <sup>b</sup> (%) | <i>ee</i> <sup>c</sup> (%) |
|-------|----------------------|---------------------------------|------------------------|----------------------------|
| 1     | Cu(OTf) <sub>2</sub> | Et <sub>3</sub> N               | Trace                  | --                         |
| 2     | Zn(OTf) <sub>2</sub> | Et <sub>3</sub> N               | 97                     | 75                         |
| 3     | Zn(OTf) <sub>2</sub> | Li <sub>2</sub> CO <sub>3</sub> | 99                     | 35                         |
| 4     | Zn(OTf) <sub>2</sub> | Cs <sub>2</sub> CO <sub>3</sub> | 98                     | 86                         |
| 5     | Zn(OTf) <sub>2</sub> | Na <sub>2</sub> CO <sub>3</sub> | 99                     | 62                         |
| 6     | Zn(OTf) <sub>2</sub> | <i>t</i> -BuOK                  | 98                     | 58                         |
| 7     | Zn(OTf) <sub>2</sub> | DABCO                           | 98                     | 64                         |
| 8     | Zn(OTf) <sub>2</sub> | DIPEA                           | 98                     | 37                         |
| 9     | Zn(OTf) <sub>2</sub> | DBU                             | 98                     | 54                         |
| 10    | Zn(OTf) <sub>2</sub> | N-Ethylmorpholin                | 98                     | 57                         |

<sup>a</sup>Unless otherwise noted, the reaction of **1a** (0.1 mmol) and **2b** (0.25 mmol) was performed in the presence of L<sub>1</sub> (10 mol %), base (10 mol %), metal salt (10 mol %) in *i*-PrOH (1.0 mL). <sup>b</sup>Isolated yield. <sup>c</sup>Determined by chiral HPLC analysis.

### 1.3 General working procedure

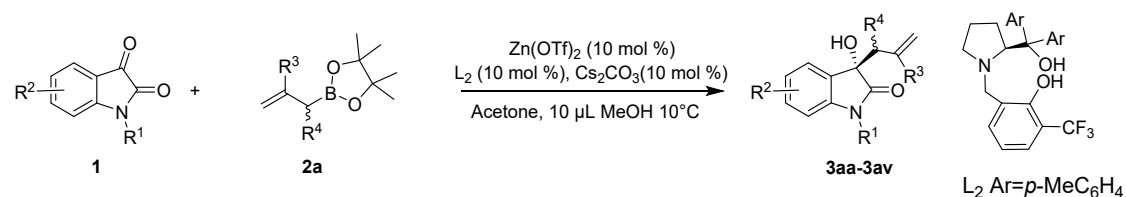

A mixture of Zn(OTf)<sub>2</sub> (3.6 mg, 0.01 mmol) and the ligand L<sub>2</sub> (4.6 mg, 0.01 mmol) in acetone (1 mL) with Cs<sub>2</sub>CO<sub>3</sub> (3.3 mg, 0.01 mmol) was stirred at room temperature for 2 h. MeOH (10 μL) and isatin **1** (0.1 mmol) were then added and the resulting mixture was cooled to 10°C. After stirring the mixture for 0.5 h, allylborate **2a** (0.25 mmol) was added in one portion. After the reaction was completed (monitored by TLC), the reaction mixture was evaporated in vacuo. Purification of the residue by column chromatography afforded the desired product **3aa-3av**.

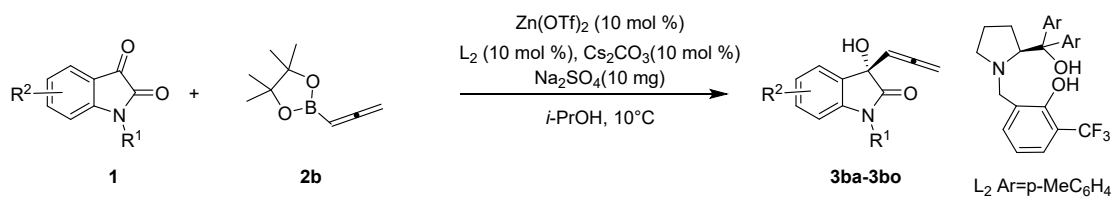

A mixture of  $\text{Zn(OTf)}_2$  (3.6 mg, 0.01 mmol), the ligand ( $\text{L}_2$ , 4.6 mg, 0.01 mmol), and  $\text{Na}_2\text{SO}_4$  (10 mg) in *i*-PrOH (1 mL) with  $\text{Cs}_2\text{CO}_3$  (3.3 mg, 0.01 mmol) was stirred at room temperature for 2 h. Isatins **1** (0.1 mmol) were then added and the resulting mixture was cooled to  $10^\circ\text{C}$ . After stirring the mixture for 0.5 h, allenylborate **2b** (0.25 mmol) was added in one portion. After the reaction was completed (monitored by TLC), the reaction mixture was evaporated in vacuo. Purification of the residue by column chromatography afforded the desired product **3ba-3bo**.

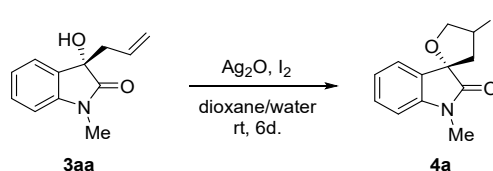

To a solution of **3aa** (60.9 mg, 0.3 mmol) in 1,4-Dioxane/ $\text{H}_2\text{O}$  (2.8 mL/0.4 mL),  $\text{Ag}_2\text{O}$  (104 mg, 0.45 mmol) and  $\text{I}_2$  (114.3 mg, 0.45 mmol) was added, and the resulting solution was stirred for 6 days at room temperature. The resulting mixture was extracted with  $\text{CH}_2\text{Cl}_2$  (3 x 10 mL). The organic layer was washed with brine, dried over  $\text{Na}_2\text{SO}_4$  and removed the solvent in vacuo. Purification of the residue by column chromatography afforded the white solid **4a** (37.5 mg, 38% yield).

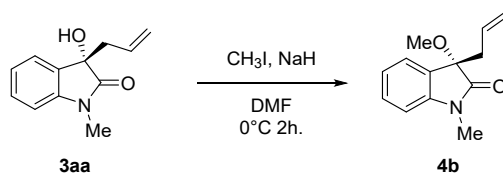

To a solution of **3aa** (20.6 mg, 0.2 mmol) in DMF (4.0 mL),  $\text{NaH}$  (12 mg, 0.5 mmol) was added at  $0^\circ\text{C}$ , and the resulting solution was stirred for 30 minutes.  $\text{CH}_3\text{I}$  (18.8  $\mu\text{L}$ , 0.3 mmol) was added and the solution was then warmed up slowly from  $0^\circ\text{C}$  to room temperature and stirred for 2 hours. The reaction was then re-cooled to  $0^\circ\text{C}$  and quenched by addition of aqueous  $\text{NH}_4\text{Cl}$  solution. The resulting mixture was extracted with  $\text{CH}_2\text{Cl}_2$  (3 x 10 mL), and the organic layer was washed with brine, dried over  $\text{Na}_2\text{SO}_4$  and the solvent was removed in vacuo. Purification of the residue by column chromatography afforded the yellow oil **4b** (35.6 mg, 82% yield).

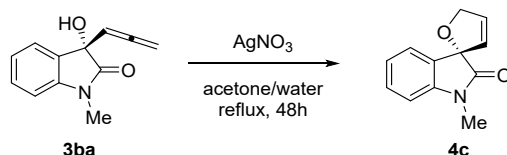

To a solution of **3ba** (20.1 mg, 0.1 mmol) in acetone/H<sub>2</sub>O (1 mL/1 mL), AgNO<sub>3</sub> (17 mg, 0.1 mmol) was added, and the resulting solution was refluxed for 48 hours. The resulting mixture was extracted with CH<sub>2</sub>Cl<sub>2</sub> (3×10 mL). The organic layer was washed with brine, dried over Na<sub>2</sub>SO<sub>4</sub> and removed the solvent in vacuo. Purification of the residue by column chromatography afforded the white solid **4c** (17.5 mg, 87% yield).

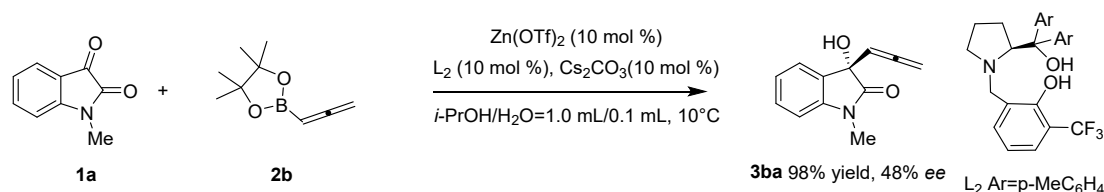

A mixture of Zn(OTf)<sub>2</sub> (3.6 mg, 0.01 mmol), the ligand (**L**<sub>2</sub>, 4.6 mg, 0.01 mmol) in *i*-PrOH/H<sub>2</sub>O (1.0 mL/0.1 mL) with Cs<sub>2</sub>CO<sub>3</sub> (3.3 mg, 0.01 mmol) was stirred at room temperature for 2 h. Isatins **1a** (0.1 mmol) were then added and the resulting mixture was cooled to 10°C. After stirring the mixture for 0.5 h, allenylborate **2b** (0.25 mmol) was added in one portion. After the reaction was completed (monitored by TLC), the reaction mixture was evaporated in vacuo. Purification of the residue by column chromatography afforded the desired product **3ba** with 98% yield and 48% *ee*.

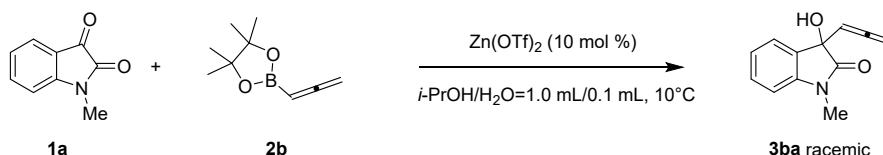

A mixture of Zn(OTf)<sub>2</sub> (3.6 mg, 0.01 mmol) and isatins **1a** (0.1 mmol) in *i*-PrOH/H<sub>2</sub>O (1.0 mL/0.1 mL) was stirred at 10°C for 0.5 h. Allenylborate **2b** (0.25 mmol) was added in one portion. After the reaction was stirred for 12 h, the reaction mixture was evaporated in vacuo. Purification of the residue by column chromatography afforded the desired product racemic **3ba** (8.3 mg, 41% yield).

## 1.4 Experimental date of products

### (S)-3-allyl-3-hydroxy-1-methylindolin-2-one (3aa) [3], [4]

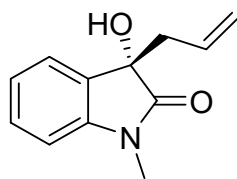

The title compound was prepared according to the general working procedure and purified by column chromatography (ethyl acetate/petroleum ether) to give the product as white solid (19.9 mg, 98% yield).  $[\alpha]_D^{20} = -40.7$  ( $c = 0.5$ ,  $\text{CHCl}_3$ , 93% *ee*); HPLC: Daicel Chiralpak IC, hexane: 2-propanol = 80:20, flow rate = 1.0 mL/min,  $T = 30^\circ\text{C}$ , UV = 254 nm,  $t_R = 8.4$  min (minor),  $t_R = 10.5$  min (major);  $^1\text{H NMR}$  (400 MHz,  $\text{CDCl}_3$ )  $\delta$  7.39 (dd,  $J = 7.4, 0.8$  Hz, 1H), 7.32 (ddd,  $J = 7.8, 6.3, 1.2$  Hz, 1H), 7.09 (td,  $J = 7.6, 0.9$  Hz, 1H), 6.82 (d,  $J = 7.8$  Hz, 1H), 5.72 – 5.54 (m, 1H), 5.16 – 5.02 (m, 2H), 3.63 (s, 1H), 3.16 (s, 3H), 2.83 – 2.72 (m, 1H), 2.62 (dd,  $J = 13.4, 8.3$  Hz, 1H).  $^{13}\text{C NMR}$  (100 MHz,  $\text{CDCl}_3$ )  $\delta$  177.9, 143.2, 130.6, 129.8, 129.7, 124.1, 123.1, 120.3, 108.4, 76.0, 42.9, 26.2.

### (S)-1,3-diallyl-3-hydroxyindolin-2-one (3ab) [3]

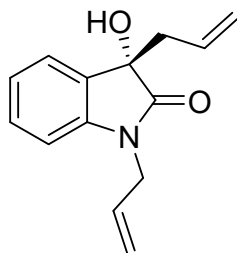

The title compound was prepared according to the general working procedure and purified by column chromatography (ethyl acetate/petroleum ether) to give the product as white solid (22.6 mg, 99% yield).  $[\alpha]_D^{20} = -37.8$  ( $c = 0.6$ ,  $\text{CHCl}_3$ , 97% *ee*); HPLC: Daicel Chiralpak AS-H, hexane: 2-propanol = 80:20, flow rate = 1.0 mL/min,  $T = 30^\circ\text{C}$ , UV = 230 nm,  $t_R = 8.0$  min (minor),  $t_R = 12.5$  min (major);  $^1\text{H NMR}$  (500 MHz,  $\text{CDCl}_3$ )  $\delta$  7.40 (d,  $J = 7.3$  Hz, 1H), 7.33 – 7.23 (m, 1H), 7.09 (t,  $J = 7.5$  Hz, 1H), 6.81 (d,  $J = 7.8$  Hz, 1H), 5.89 – 5.72 (m, 1H), 5.69 – 5.53 (m, 1H), 5.30 – 5.17 (m, 2H), 5.16 – 5.00 (m, 2H), 4.48 – 4.33 (m, 1H), 4.24 – 4.12 (m, 1H), 3.37 (s, 1H), 2.78 (dd,  $J = 13.3, 6.3$  Hz, 1H), 2.66 (dd,  $J = 13.2, 8.4$  Hz, 1H).  $^{13}\text{C NMR}$  (125 MHz,  $\text{CDCl}_3$ )  $\delta$  176.5, 141.4, 130.1, 129.5, 128.6, 128.5, 123.1, 122.0, 119.5, 116.6, 108.3, 74.9, 42.0, 41.3.

### (S)-3-allyl-3-hydroxy-1-phenylindolin-2-one (3ac) [3]

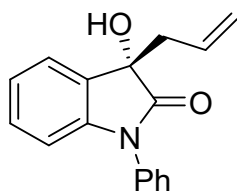

The title compound was prepared according to the general working procedure and purified by column chromatography (ethyl acetate/petroleum ether) to give the product as white solid (25.7 mg, 97% yield).  $[\alpha]_D^{20} = -49.0$  ( $c = 0.6$ ,  $\text{CHCl}_3$ , 89% *ee*); HPLC: Daicel Chiralpak AS-H, hexane: 2-propanol = 80:20, flow rate = 1.0 mL/min,  $T = 30^\circ\text{C}$ , UV = 254 nm,  $t_R = 7.1$  min (minor),  $t_R = 9.5$  min (major);  $^1\text{H NMR}$  (400 MHz,  $\text{CDCl}_3$ )  $\delta$  7.58 – 7.34 (m, 6H), 7.25 (t,  $J = 7.7$  Hz, 1H), 7.13 (t,  $J = 7.5$  Hz, 1H), 6.80 (d,  $J = 7.9$  Hz, 1H), 5.79 – 5.56 (m, 1H), 5.24 – 5.07 (m, 2H), 3.26 (s, 1H), 2.92 – 2.66 (m, 2H).  $^{13}\text{C NMR}$  (100 MHz,  $\text{CDCl}_3$ )  $\delta$  177.2, 143.3, 134.0, 130.4, 129.7, 129.6, 129.3, 128.3, 126.5, 124.4, 123.6, 120.7, 109.7, 76.1, 43.5.

### (S)-3-allyl-1-benzyl-3-hydroxyindolin-2-one (3ad) [3]

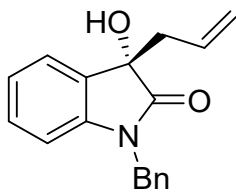

The title compound was prepared according to the general working procedure and purified by column chromatography (ethyl acetate/petroleum ether) to give the product as white solid (27.6 mg, 99% yield).  $[\alpha]_{\text{D}}^{20} = -15.5$  ( $c = 0.3$ ,  $\text{CHCl}_3$ , 95% *ee*); HPLC: Daicel Chiralpak AS-H, hexane: 2-propanol = 80:20, flow rate = 1.0 mL/min,  $T = 30^\circ\text{C}$ , UV = 230 nm,  $t_{\text{R}} = 14.6$  min (minor),  $t_{\text{R}} = 17.8$  min (major);  $^1\text{H NMR}$  (400 MHz,  $\text{CDCl}_3$ )  $\delta$  7.40 (d,  $J = 7.2$  Hz, 1H), 7.33 – 7.22 (m, 5H), 7.19 (t,  $J = 7.7$  Hz, 1H), 7.06 (t,  $J = 7.5$  Hz, 1H), 6.69 (d,  $J = 7.8$  Hz, 1H), 5.71 – 5.54 (m, 1H), 5.20 – 4.95 (m, 3H), 4.71 (d,  $J = 15.7$  Hz, 1H), 3.39 (s, 1H), 2.82 (dd,  $J = 13.3, 6.2$  Hz, 1H), 2.71 (dd,  $J = 13.3, 8.5$  Hz, 1H).  $^{13}\text{C NMR}$  (100 MHz,  $\text{CDCl}_3$ )  $\delta$  177.9, 142.5, 135.4, 130.6, 129.7, 129.6, 128.8, 127.7, 127.3, 124.2, 123.1, 120.6, 109.5, 76.0, 43.8, 43.1.

**(S)-3-allyl-3-hydroxy-1-(prop-2-yn-1-yl)indolin-2-one (3ae)** [5]

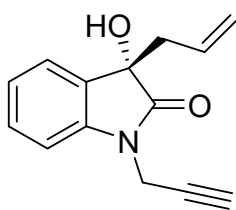

The title compound was prepared according to the general working procedure and purified by column chromatography (ethyl acetate/petroleum ether) to give the product as white solid (22.2 mg, 98% yield).  $[\alpha]_{\text{D}}^{20} = -41.8$  ( $c = 0.6$ ,  $\text{CHCl}_3$ , 95% *ee*); HPLC: Daicel Chiralpak AS-H, hexane: 2-propanol = 80:20, flow rate = 1.0 mL/min,  $T = 30^\circ\text{C}$ , UV = 230 nm,  $t_{\text{R}} = 10.9$  min (minor),  $t_{\text{R}} = 16.7$  min (major);  $^1\text{H NMR}$  (500 MHz,  $\text{CDCl}_3$ )  $\delta$  7.34 (d,  $J = 7.3$  Hz, 1H), 7.28 (t,  $J = 7.7$  Hz, 1H), 7.06 (t,  $J = 7.5$  Hz, 1H), 6.97 (d,  $J = 7.8$  Hz, 1H), 5.63 – 5.49 (m, 1H), 5.02 (dd,  $J = 12.8, 10.0$  Hz, 2H), 4.45 (dd,  $J = 17.7, 2.2$  Hz, 1H), 4.30 (dd,  $J = 17.7, 2.1$  Hz, 1H), 3.24 (s, 1H), 2.68 (dd,  $J = 13.3, 6.3$  Hz, 1H), 2.55 (dd,  $J = 13.3, 8.3$  Hz, 1H), 2.16 (s, 1H).  $^{13}\text{C NMR}$  (125 MHz,  $\text{CDCl}_3$ )  $\delta$  175.8, 140.3, 129.2, 128.6, 128.5, 123.2, 122.4, 119.6, 108.4, 75.5, 74.8, 71.5, 41.9, 28.3.

**(S)-3-allyl-3-hydroxy-1-(naphthalen-1-ylmethyl)indolin-2-one (3af)** [6]

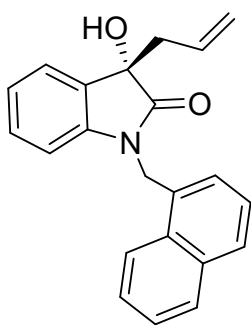

The title compound was prepared according to the general working procedure and purified by column chromatography (ethyl acetate/petroleum ether) to give the product as white solid (32.6 mg, 99% yield).  $[\alpha]_{\text{D}}^{20} = +1.9$  ( $c = 0.7$ ,  $\text{CHCl}_3$ , 90% *ee*); HPLC: Daicel Chiralpak AS-H, hexane: 2-propanol = 80:20, flow rate = 1.0 mL/min,  $T = 30^\circ\text{C}$ , UV = 230 nm,  $t_{\text{R}} = 15.9$  min (major),  $t_{\text{R}} = 22.5$  min (minor);  $^1\text{H NMR}$  (500 MHz,  $\text{CDCl}_3$ )  $\delta$  7.99 (d,  $J = 7.9$  Hz, 1H), 7.80 (d,  $J = 8.0$  Hz, 1H), 7.70 (d,  $J = 8.0$  Hz, 1H), 7.53 – 7.41 (m, 2H), 7.34 (d,  $J = 7.3$  Hz, 1H), 7.28 (td,  $J = 7.9, 2.6$  Hz, 1H), 7.21 (d,  $J = 6.9$  Hz, 1H), 7.05 (ddd,  $J = 7.7, 5.0, 1.7$  Hz, 1H), 6.97 (td,  $J = 7.5, 2.3$  Hz, 1H), 6.57 (dd,  $J = 7.8, 2.2$  Hz, 1H), 5.73 – 5.56 (m, 1H), 5.47 (d,  $J = 16.2$  Hz, 1H), 5.13 – 4.98 (m, 3H), 3.32 (s, 1H), 2.77 (dd,  $J = 13.0, 6.0$  Hz, 1H), 2.66 (dd,  $J = 13.2, 8.6$  Hz, 1H).  $^{13}\text{C NMR}$  (125 MHz,  $\text{CDCl}_3$ )  $\delta$  178.1, 142.8, 133.7, 131.0, 130.6, 130.2, 129.8, 129.7, 129.0, 128.4, 126.6, 126.0, 125.3, 124.6, 124.2, 123.2, 122.9, 120.8, 109.9, 76.0, 43.1, 42.1.

**(S)-3-allyl-1-(tert-butyldimethylsilyl)-3-hydroxyindolin-2-one (3ag)** [7]



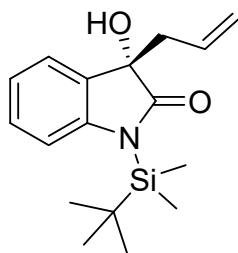

The title compound was prepared according to the general working procedure and purified by column chromatography (ethyl acetate/petroleum ether) to give the product as pale yellow oil (30.0 mg, 99% yield).  $[\alpha]_D^{20} = -26.9$  ( $c = 0.6$ ,  $\text{CHCl}_3$ , 94% *ee*); HPLC: Daicel Chiralpak IC, hexane: 2-propanol = 95:5, flow rate = 1.0 mL/min,  $T = 30^\circ\text{C}$ , UV = 254 nm,  $t_R = 4.1$  min (minor),  $t_R = 5.5$  min (major);  $^1\text{H NMR}$  (500 MHz, Acetone)  $\delta$  7.35 (dd,  $J = 7.3, 0.9$  Hz, 1H), 7.25 – 7.19 (m, 1H), 7.07 (d,  $J = 8.0$  Hz, 1H), 7.03 (t,  $J = 7.5$  Hz, 1H), 5.51 – 5.40 (m, 1H), 4.99 – 4.89 (m, 3H), 2.70 (dd,  $J = 13.0, 6.3$  Hz, 1H), 2.60 (dd,  $J = 13.0, 8.3$  Hz, 1H), 0.99 (s, 9H), 0.51 (s, 3H), 0.50 (s, 3H).  $^{13}\text{C NMR}$  (125 MHz, Acetone)  $\delta$  184.5, 145.8, 132.8, 131.8, 128.8, 124.2, 122.0, 118.5, 112.7, 75.8, 43.2, 26.0, 19.4, -3.9, -4.1.

### (S)-3-allyl-3-hydroxyindolin-2-one (3ah) [8]

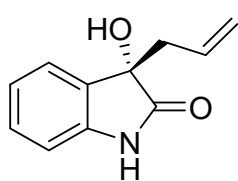

The title compound was prepared according to the general working procedure and purified by column chromatography (ethyl acetate/petroleum ether) to give the product as white solid (18.5 mg, 98% yield).  $[\alpha]_D^{20} = -8.5$  ( $c = 2.0$ , MeOH, 87% *ee*); HPLC: Daicel Chiralpak OD-H, hexane: 2-propanol = 80:20, flow rate = 1.0 mL/min,  $T = 30^\circ\text{C}$ , UV = 254 nm,  $t_R = 6.7$  min (major),  $t_R = 7.9$  min (minor);  $^1\text{H NMR}$  (400 MHz,  $\text{CDCl}_3$ )  $\delta$  8.29 (s, 1H), 7.37 (d,  $J = 7.4$  Hz, 1H), 7.29 – 7.23 (m, 1H), 7.12 – 7.04 (m, 1H), 6.88 (d,  $J = 7.8$  Hz, 1H), 5.82 – 5.51 (m, 1H), 5.18 – 5.04 (m, 2H), 3.34 (s, 1H), 2.75 (dd,  $J = 13.4, 6.4$  Hz, 1H), 2.62 (dd,  $J = 13.4, 8.3$  Hz, 1H).  $^{13}\text{C NMR}$  (100 MHz,  $\text{CDCl}_3$ )  $\delta$  180.0, 140.2, 130.3, 130.1, 129.7, 124.5, 123.1, 120.7, 110.3, 76.2, 42.8.

### (S)-3-allyl-4-chloro-3-hydroxy-1-methylindolin-2-one (3ai) [9]

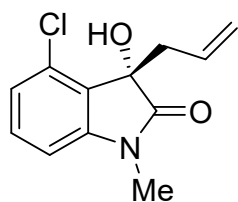

The title compound was prepared according to the general working procedure and purified by column chromatography (ethyl acetate/petroleum ether) to give the product as white solid (23.2 mg, 98% yield).  $[\alpha]_D^{20} = +2.9$  ( $c = 0.6$ ,  $\text{CHCl}_3$ , 94% *ee*); HPLC: Daicel Chiralpak IC, hexane: 2-propanol = 80:20, flow rate = 1.0 mL/min,  $T = 30^\circ\text{C}$ , UV = 254 nm,  $t_R = 8.2$  min (minor),  $t_R = 9.7$  min (major);  $^1\text{H NMR}$  (500 MHz,  $\text{CDCl}_3$ )  $\delta$  7.26 (dd,  $J = 12.4, 4.2$  Hz, 1H), 7.03 (dd,  $J = 8.2, 0.7$  Hz, 1H), 6.72 (dd,  $J = 7.8, 0.6$  Hz, 1H), 5.44 – 5.31 (m, 1H), 5.15 – 5.05 (m, 1H), 4.98 – 4.91 (m, 1H), 3.25 (s, 1H), 3.19 – 3.11 (m, 4H), 2.88 (dd,  $J = 12.9, 8.0$  Hz, 1H).  $^{13}\text{C NMR}$  (125 MHz,  $\text{CDCl}_3$ )  $\delta$  175.5, 144.2, 130.5, 129.8, 129.0, 124.7, 123.1, 119.3, 105.8, 76.3, 39.2, 25.3.

### (S)-3-allyl-4-bromo-3-hydroxy-1-methylindolin-2-one (3aj) [4]

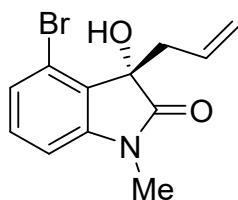

The title compound was prepared according to the general working procedure and purified by column chromatography (ethyl acetate/petroleum ether) to give the product as white solid (27.5 mg, 98% yield).  $[\alpha]_D^{20} = +2.1$  ( $c = 0.35$ ,  $\text{CHCl}_3$ , 93% *ee*);

HPLC: Daicel Chiralpak IC, hexane: 2-propanol = 80:20, flow rate = 1.0 mL/min, T = 30°C, UV = 254 nm,  $t_R$  = 8.6 min (minor),  $t_R$  = 10.2 min (major);  $^1\text{H}$  NMR (500 MHz,  $\text{CDCl}_3$ )  $\delta$  7.24 – 7.15 (m, 2H), 6.75 (dd,  $J$  = 7.2, 1.1 Hz, 1H), 5.43 – 5.28 (m, 1H), 5.10 (d,  $J$  = 17.0 Hz, 1H), 4.96 (dd,  $J$  = 10.1, 1.0 Hz, 1H), 3.21 (dd,  $J$  = 12.9, 6.9 Hz, 1H), 3.16 (s, 3H), 2.85 (dd,  $J$  = 12.9, 8.1 Hz, 1H).  $^{13}\text{C}$  NMR (125 MHz,  $\text{CDCl}_3$ )  $\delta$  176.5, 145.5, 131.0, 129.9, 127.5, 127.2, 120.3, 119.4, 107.4, 77.8, 40.1, 26.3.

**(S)-3-allyl-3-hydroxy-1,5-dimethylindolin-2-one (3ak)** [4]

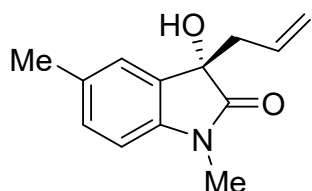

The title compound was prepared according to the general working procedure and purified by column chromatography (ethyl acetate/petroleum ether) to give the product as white solid (21.3 mg, 98% yield).  $[\alpha]_D^{20}$  = -29.8 ( $c$  = 0.4,  $\text{CHCl}_3$ , 90%  $ee$ ); HPLC: Daicel Chiralpak OJ-H, hexane: 2-propanol = 90:10, flow rate = 1.0 mL/min, T = 30°C, UV = 254 nm,  $t_R$  = 7.2 min (minor),  $t_R$  = 10.9 min (major);  $^1\text{H}$  NMR (500 MHz,  $\text{CDCl}_3$ )  $\delta$  7.21 (s, 1H), 7.12 (d,  $J$  = 7.8 Hz, 1H), 6.71 (d,  $J$  = 7.9 Hz, 1H), 5.73 – 5.58 (m, 1H), 5.11 (t,  $J$  = 13.2 Hz, 2H), 3.15 (s, 3H), 2.73 (dd,  $J$  = 13.4, 6.3 Hz, 1H), 2.61 (dd,  $J$  = 13.4, 8.4 Hz, 1H), 2.35 (s, 3H).  $^{13}\text{C}$  NMR (125 MHz,  $\text{CDCl}_3$ )  $\delta$  176.6, 139.9, 131.7, 129.6, 128.8, 128.6, 123.8, 119.3, 107.1, 74.9, 41.9, 25.2, 20.1.

**(S)-3-allyl-3-hydroxy-5-methoxy-1-methylindolin-2-one (3al)** [9]

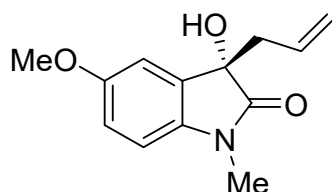

The title compound was prepared according to the general working procedure and purified by column chromatography (ethyl acetate/petroleum ether) to give the product as white solid (23.1 mg, 99% yield).  $[\alpha]_D^{20}$  = -8.6 ( $c$  = 1.33,  $\text{CHCl}_3$ , 90%  $ee$ ); HPLC: Daicel Chiralpak IC, hexane: 2-propanol = 80:20, flow rate = 1.0 mL/min, T = 30°C, UV = 254 nm,  $t_R$  = 12.5 min (minor),  $t_R$  = 19.1 min (major);  $^1\text{H}$  NMR (500 MHz,  $\text{CDCl}_3$ )  $\delta$  7.02 (d,  $J$  = 2.5 Hz, 1H), 6.84 (dd,  $J$  = 8.4, 2.5 Hz, 1H), 6.73 (d,  $J$  = 8.5 Hz, 1H), 5.74 – 5.54 (m, 1H), 5.19 – 5.01 (m, 2H), 3.81 (s, 3H), 3.43 (s, 1H), 3.15 (s, 3H), 2.74 (dd,  $J$  = 13.4, 6.3 Hz, 1H), 2.61 (dd,  $J$  = 13.4, 8.4 Hz, 1H).  $^{13}\text{C}$  NMR (125 MHz,  $\text{CDCl}_3$ )  $\delta$  176.5, 155.3, 135.5, 129.9, 129.5, 119.3, 113.1, 110.2, 107.8, 75.2, 54.8, 42.0, 25.2. HRMS (ESI)  $m/z$   $[\text{M}+\text{Na}]^+$  calcd for  $\text{C}_{13}\text{H}_{15}\text{NNaO}_3$  256.0944, found 256.0938.

**(S)-3-allyl-3-hydroxy-6-methoxy-1-methylindolin-2-one (3am)**

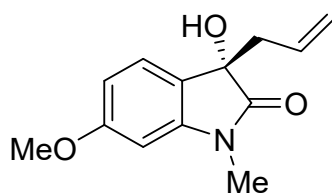

The title compound was prepared according to the general working procedure and purified by column chromatography (ethyl acetate/petroleum ether) to give the product as white solid (22.6 mg, 97% yield). MP: 76-78°C;  $[\alpha]_D^{20}$  = -33.1 ( $c$  = 0.8,  $\text{CHCl}_3$ , 97%  $ee$ ); HPLC: Daicel Chiralpak OD-H, hexane: 2-propanol = 80:20, flow rate = 1.0 mL/min, T = 30°C, UV = 254 nm,  $t_R$  = 6.5 min (minor),  $t_R$  = 8.3 min (major);  $^1\text{H}$  NMR (500 MHz,  $\text{CDCl}_3$ )  $\delta$  7.31 – 7.24 (m, 1H), 6.65 – 6.51 (m, 1H), 6.40 (d,  $J$  = 1.9 Hz, 1H), 5.74 –

5.56 (m, 1H), 5.17 – 5.01 (m, 2H), 3.83 (s, 3H), 3.14 (s, 3H), 2.73 (dd,  $J = 13.3, 6.3$  Hz, 1H), 2.58 (dd,  $J = 13.3, 8.4$  Hz, 1H).  $^{13}\text{C}$  NMR (125 MHz,  $\text{CDCl}_3$ )  $\delta$  177.2, 160.3, 143.7, 129.7, 123.9, 120.6, 119.2, 105.4, 95.5, 74.5, 54.5, 41.8, 25.1. HRMS (ESI)  $m/z$   $[\text{M}+\text{Na}]^+$  calcd for  $\text{C}_{13}\text{H}_{15}\text{NNaO}_3$  256.0944, found 256.0942.

**(S)-3-allyl-3-hydroxy-1,5,7-trimethylindolin-2-one (3an)**

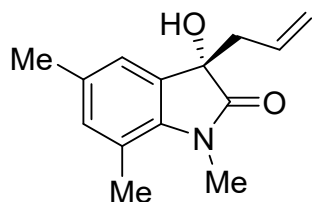

The title compound was prepared according to the general working procedure and purified by column chromatography (ethyl acetate/petroleum ether) to give the product as white solid (22.4 mg, 97% yield). MP: 139-142°C;  $[\alpha]_{\text{D}}^{20} = -14.1$  ( $c = 0.5$ ,  $\text{CHCl}_3$ , 91% *ee*); HPLC: Daicel Chiralpak OJ-H, hexane: 2-propanol = 90:10, flow rate = 1.0 mL/min,  $T = 30^\circ\text{C}$ , UV = 254 nm,  $t_{\text{R}} = 9.5$  min (major),  $t_{\text{R}} = 11.6$  min (minor);  $^1\text{H}$  NMR (500 MHz,  $\text{CDCl}_3$ )  $\delta$  7.04 (s, 1H), 6.85 (s, 1H), 5.70 – 5.55 (m, 1H), 5.17 – 5.04 (m, 2H), 3.41 (s, 3H), 2.68 (dd,  $J = 13.3, 6.3$  Hz, 1H), 2.60 (dd,  $J = 13.3, 8.4$  Hz, 1H), 2.50 (s, 3H), 2.29 (s, 3H).  $^{13}\text{C}$  NMR (125 MHz,  $\text{CDCl}_3$ )  $\delta$  178.4, 138.4, 133.8, 132.6, 130.8, 130.5, 122.6, 120.2, 119.7, 75.2, 43.2, 29.5, 20.8, 18.8. HRMS (ESI)  $m/z$   $[\text{M}+\text{Na}]^+$  calcd for  $\text{C}_{14}\text{H}_{17}\text{NNaO}_2$  254.1151, found 254.1146.

**(S)-3-allyl-5-fluoro-3-hydroxy-1-methylindolin-2-one (3ao)** <sup>[10]</sup>

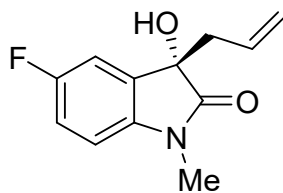

The title compound was prepared according to the general working procedure and purified by column chromatography (ethyl acetate/petroleum ether) to give the product as white solid (21.9 mg, 99% yield). MP: 135-137°C  $[\alpha]_{\text{D}}^{20} -30.7$  ( $c = 0.5$ ,  $\text{CHCl}_3$ , 90% *ee*); HPLC: Daicel Chiralpak IC, hexane: 2-propanol = 80:20, flow rate = 1.0 mL/min,  $T = 30^\circ\text{C}$ , UV = 254 nm,  $t_{\text{R}} = 7.1$  min (minor),  $t_{\text{R}} = 8.7$  min (major);  $^1\text{H}$  NMR (500 MHz,  $\text{CDCl}_3$ )  $\delta$  7.14 (dd,  $J = 7.6, 2.4$  Hz, 1H), 7.02 (td,  $J = 8.8, 2.4$  Hz, 1H), 6.75 (dd,  $J = 8.4, 3.9$  Hz, 1H), 5.72 – 5.52 (m, 1H), 5.15 – 5.04 (m,  $J = 17.3, 6.7$  Hz, 2H), 3.67 (s, 1H), 3.18 (s, 3H), 2.74 (dd,  $J = 13.4, 6.4$  Hz, 1H), 2.60 (dd,  $J = 13.4, 8.4$  Hz, 1H).  $^{13}\text{C}$  NMR (125 MHz,  $\text{CDCl}_3$ )  $\delta$  177.7, 159.5 (d,  $J = 241.8$  Hz), 139.1, 131.4 (d,  $J = 7.6$  Hz), 130.1, 120.7, 115.8 (d,  $J = 23.4$  Hz), 112.4 (d,  $J = 24.9$  Hz), 109.0 (d,  $J = 8.1$  Hz), 76.1, 42.9, 26.3.  $^{19}\text{F}$  NMR (470 MHz,  $\text{CDCl}_3$ )  $\delta$  -119.7.

**(S)-3-allyl-5-bromo-3-hydroxy-1-methylindolin-2-one (3ap)**

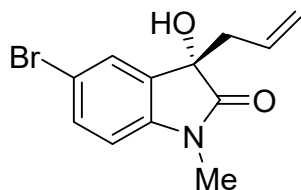

The title compound was prepared according to the general working procedure and purified by column chromatography (ethyl acetate/petroleum ether) to give the product as white solid (27.5 mg, 98% yield). MP: 140-144°C;  $[\alpha]_{\text{D}}^{20} -5.4$  ( $c = 0.6$ ,  $\text{CHCl}_3$ , 95% *ee*); HPLC: Daicel Chiralpak IC, hexane: 2-propanol = 80:20, flow rate = 1.0 mL/min,  $T = 30^\circ\text{C}$ , UV = 254 nm,  $t_{\text{R}} = 6.9$  min (minor),  $t_{\text{R}} = 10.0$  min (major);  $^1\text{H}$  NMR (500 MHz,  $\text{CDCl}_3$ )  $\delta$  7.37 (d,  $J = 2.0$  Hz, 1H), 7.30 (dd,  $J = 8.3, 2.0$  Hz, 1H), 6.75 (dd,  $J = 8.3, 3.7$  Hz, 1H), 5.69 – 5.53 (m, 1H), 5.16 – 5.05 (m, 2H), 3.65 (s, 1H), 3.15 (s, 3H), 2.74 (dd,  $J = 13.4,$

6.4 Hz, 1H), 2.61 (dd,  $J = 13.4, 8.3$  Hz, 1H).  $^{13}\text{C}$  NMR (125 MHz,  $\text{CDCl}_3$ )  $\delta$  176.5, 140.7, 130.4, 128.9, 128.5, 127.5, 123.7, 119.8, 108.4, 74.9, 41.8, 25.3. HRMS (ESI)  $m/z$   $[\text{M}+\text{Na}]^+$  calcd for  $\text{C}_{12}\text{H}_{12}\text{BrNNaO}_2$  303.9944, found 303.9943.

### (S)-3-allyl-6-fluoro-3-hydroxy-1-methylindolin-2-one (3aq)

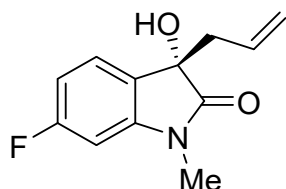

The title compound was prepared according to the general working procedure and purified by column chromatography (ethyl acetate/petroleum ether) to give the product as white solid (21.4 mg, 97% yield). MP: 114-117°C  $[\alpha]_{\text{D}}^{20} -23.3$  ( $c = 0.5$ ,  $\text{CHCl}_3$ , 90%  $ee$ ); HPLC: Daicel Chiralpak OJ-H, hexane: 2-propanol = 90:10, flow rate = 1.0 mL/min,  $T = 30^\circ\text{C}$ , UV = 254 nm,  $t_{\text{R}} = 11.5$  min (major),  $t_{\text{R}} = 14.9$  min (minor);  $^1\text{H}$  NMR (500 MHz,  $\text{CDCl}_3$ )  $\delta$  7.33 (dd,  $J = 8.2, 5.4$  Hz, 1H), 6.77 (ddd,  $J = 9.6, 8.2, 2.3$  Hz, 1H), 6.57 (dd,  $J = 8.8, 2.2$  Hz, 1H), 5.70 – 5.51 (m, 1H), 5.16 – 5.02 (m, 2H), 3.16 (s, 3H), 2.74 (dd,  $J = 13.4, 6.4$  Hz, 1H), 2.59 (dd,  $J = 13.4, 8.3$  Hz, 1H).  $^{13}\text{C}$  NMR (125 MHz,  $\text{CDCl}_3$ )  $\delta$  177.2, 162.9 (d,  $J = 246.7$  Hz), 143.9 (d,  $J = 11.3$  Hz), 129.2, 124.4 (d,  $J = 10.0$  Hz), 124.1 (d,  $J = 2.7$  Hz), 119.6, 108.0 (d,  $J = 22.6$  Hz), 96.3 (d,  $J = 27.6$  Hz), 74.5, 41.8, 25.3.  $^{19}\text{F}$  NMR (470 MHz,  $\text{CDCl}_3$ )  $\delta$  -109.9. HRMS (ESI)  $m/z$   $[\text{M}+\text{Na}]^+$  calcd for  $\text{C}_{12}\text{H}_{12}\text{FNNaO}_2$  244.0744, found 244.0740.

### (S)-3-allyl-6-chloro-3-hydroxy-1-methylindolin-2-one (3ar)

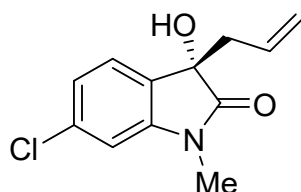

The title compound was prepared according to the general working procedure and purified by column chromatography (ethyl acetate/petroleum ether) to give the product as white solid (23.2 mg, 98% yield). MP: 63-68°C.  $[\alpha]_{\text{D}}^{20} -31.3$  ( $c = 0.5$ ,  $\text{CHCl}_3$ , 95%  $ee$ ); HPLC: Daicel Chiralpak IC, hexane: 2-propanol = 80:20, flow rate = 1.0 mL/min,  $T = 30^\circ\text{C}$ , UV = 254 nm,  $t_{\text{R}} = 6.9$  min (minor),  $t_{\text{R}} = 8.1$  min (major);  $^1\text{H}$  NMR (500 MHz,  $\text{CDCl}_3$ )  $\delta$  7.30 (d,  $J = 7.9$  Hz, 1H), 7.07 (dd,  $J = 7.9, 1.4$  Hz, 1H), 6.82 (d,  $J = 1.4$  Hz, 1H), 5.67 – 5.52 (m, 1H), 5.15 – 5.01 (m, 2H), 3.49 (s, 1H), 3.15 (s, 3H), 2.73 (dd,  $J = 13.4, 6.4$  Hz, 1H), 2.59 (dd,  $J = 13.3, 8.4$  Hz, 1H).  $^{13}\text{C}$  NMR (125 MHz,  $\text{CDCl}_3$ )  $\delta$  177.9, 144.5, 135.5, 130.1, 128.1, 125.1, 122.9, 120.7, 109.2, 75.6, 42.8, 26.3. HRMS (ESI)  $m/z$   $[\text{M}+\text{Na}]^+$  calcd for  $\text{C}_{12}\text{H}_{12}\text{ClNNaO}_2$  260.0449, found 260.0446.

### (S)-3-allyl-7-bromo-3-hydroxy-1-methylindolin-2-one (3as)

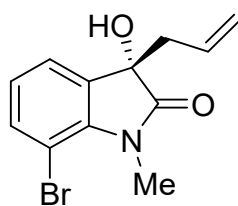

The title compound was prepared according to the general working procedure and purified by column chromatography (ethyl acetate/petroleum ether) to give the product as white solid (27.3 mg, 97% yield). MP: 74-78°C.  $[\alpha]_{\text{D}}^{20} = -23.6$  ( $c = 0.5$ ,  $\text{CHCl}_3$ , 91%  $ee$ ); HPLC: Daicel Chiralpak OJ-H, hexane: 2-propanol = 90:10, flow rate = 1.0 mL/min,  $T = 30^\circ\text{C}$ , UV = 254 nm,  $t_{\text{R}} = 7.7$  min (major),  $t_{\text{R}} = 8.3$  min (minor);  $^1\text{H}$  NMR (500 MHz,  $\text{CDCl}_3$ )  $\delta$  7.42 (dd,  $J = 8.2, 1.0$  Hz, 1H), 7.31 (dd,  $J = 7.3, 1.1$  Hz, 1H), 6.97 – 6.92 (m, 1H), 5.66 –

5.51 (m, 1H), 5.15 – 5.04 (m, 2H), 3.54 (s, 3H), 2.71 (dd,  $J = 13.4, 6.4$  Hz, 1H), 2.61 (dd,  $J = 13.4, 8.4$  Hz, 1H).  $^{13}\text{C}$  NMR (126 MHz,  $\text{CDCl}_3$ )  $\delta$  178.4, 140.5, 135.2, 133.0, 130.1, 124.3, 123.2, 120.8, 102.7, 75.3, 43.2, 29.8. HRMS (ESI)  $m/z$   $[\text{M}+\text{Na}]^+$  calcd for  $\text{C}_{12}\text{H}_{12}\text{BrNNaO}_2$  303.9944, found 303.9935.

**(S)-3-allyl-3-hydroxy-1-methyl-7-(trifluoromethyl)indolin-2-one (3at)**

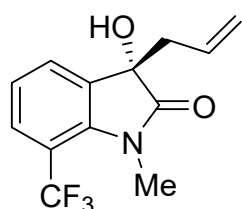

The title compound was prepared according to the general working procedure and purified by column chromatography (ethyl acetate/petroleum ether) to give the product as amorphous solid (25.7 mg, 95% yield).  $[\alpha]_{\text{D}}^{20} = -34.3$  ( $c = 0.4$ ,  $\text{CHCl}_3$ , 87% *ee*); HPLC: Daicel Chiralpak AS-H, hexane: 2-propanol = 80:20, flow rate = 1.0 mL/min,  $T = 30^\circ\text{C}$ , UV = 254 nm,  $t_{\text{R}} = 3.9$  min (minor),  $t_{\text{R}} = 5.3$  min (major);  $^1\text{H}$  NMR (500 MHz,  $\text{CDCl}_3$ )  $\delta$  7.61 (d,  $J = 8.1$  Hz, 1H), 7.56 (d,  $J = 7.2$  Hz, 1H), 7.17 (t,  $J = 7.7$  Hz, 1H), 5.66 – 5.50 (m, 1H), 5.17 – 5.03 (m, 2H), 3.37 (s, 3H), 2.73 (dd,  $J = 13.3, 6.3$  Hz, 1H), 2.62 (dd,  $J = 13.3, 8.4$  Hz, 1H).  $^{13}\text{C}$  NMR (125 MHz,  $\text{CDCl}_3$ )  $\delta$  177.8, 140.1, 131.3, 128.7, 126.5, 126.4, 122.4 (q,  $J = 271.5$  Hz), 121.5, 119.9, 111.9 (q,  $J = 33.2$  Hz), 73.1, 42.2, 27.8 (q,  $J = 6.4$  Hz).  $^{19}\text{F}$  NMR (470 MHz,  $\text{CDCl}_3$ )  $\delta$  -53.4. HRMS (ESI)  $m/z$   $[\text{M}+\text{Na}]^+$  calcd for  $\text{C}_{13}\text{H}_{12}\text{F}_3\text{NNaO}_2$  294.0712, found 294.0711.

**(S)-3-(but-3-en-2-yl)-3-hydroxy-1-methylindolin-2-one (3au)**

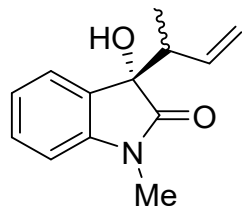

The title compound was prepared according to the general working procedure and purified by column chromatography (ethyl acetate/petroleum ether) to give the product as amorphous solid (21.3 mg, 98% yield).  $[\alpha]_{\text{D}}^{20} = -79.4$  ( $c = 1.0$ ,  $\text{CHCl}_3$ , 1:1 *dr*, 92% *ee*/87% *ee*); HPLC: Daicel Chiralpak OD-H, hexane: 2-propanol = 95:5, flow rate = 1.1 mL/min,  $T = 30^\circ\text{C}$ , UV = 254 nm,  $t_{\text{R}} = 10.5$  min (minor),  $t_{\text{R}} = 11.6$  min (minor),  $t_{\text{R}} = 12.8$  min (major),  $t_{\text{R}} = 13.8$  min (major);  $^1\text{H}$  NMR (500 MHz,  $\text{CDCl}_3$ )  $\delta$  7.42 – 7.29 (m, 2H), 7.15 – 7.03 (m, 1H), 6.88 – 6.76 (m, 1H), 6.12 – 6.02 (m, 0.5H), 5.70 – 5.58 (m, 0.5H), 5.29 – 5.06 (m, 2H), 3.19 (s, 1.5H), 3.15 (s, 1.5H), 3.09 (s, 0.5H), 3.03 (s, 0.5H), 2.90 – 2.82 (m, 0.5H), 2.80 – 2.72 (m, 0.5H), 1.02 (d,  $J = 6.9$  Hz, 1.5H), 0.77 (d,  $J = 6.8$  Hz, 1.5H).  $^{13}\text{C}$  NMR (125 MHz,  $\text{CDCl}_3$ )  $\delta$  177.7, 177.6, 144.0, 143.9, 137.1, 136.8, 129.7, 129.6, 128.7, 128.3, 124.8, 124.1, 122.9, 122.8, 118.6, 118.0, 108.2, 108.2, 78.3, 78.1, 46.9, 44.8, 26.2, 26.0, 14.0, 13.2. HRMS (ESI)  $m/z$   $[\text{M}+\text{Na}]^+$  calcd for  $\text{C}_{13}\text{H}_{15}\text{NNaO}_2$  240.0995, found 240.1007.

**(S)-3-hydroxy-1-methyl-3-(2-methylallyl)indolin-2-one (3av)**

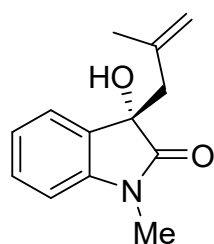

The title compound was prepared according to the general working procedure and 0.5 mmol  $\beta$ -methyl branch allylboronic acid pinacol ester was used. Purified by column chromatography (ethyl acetate/petroleum ether) to give the product as amorphous solid (20.8 mg, 96% yield).  $[\alpha]_{\text{D}}^{20} = -31.5$  ( $c = 1.0$ ,  $\text{CHCl}_3$ , 70% *ee*); HPLC: Daicel Chiralpak IC, hexane: 2-propanol = 90:10, flow rate

= 1.0 mL/min, T = 30°C, UV = 254 nm,  $t_R$  = 15.5 min (minor),  $t_R$  = 20.7 min (major);  $^1\text{H}$  NMR (500 MHz,  $\text{CDCl}_3$ )  $\delta$  7.39 (dd,  $J$  = 7.4, 1.3 Hz, 1H), 7.31 (td,  $J$  = 7.7, 1.3 Hz, 1H), 7.09 (td,  $J$  = 7.5, 1.0 Hz, 1H), 6.81 (d,  $J$  = 7.7 Hz, 1H), 4.74 (dp,  $J$  = 6.6, 1.6 Hz, 1H), 4.63 – 4.59 (m, 1H), 3.43 (s, 1H), 3.15 (s, 3H), 2.71 (s, 2H), 1.51 (s, 3H).  $^{13}\text{C}$  NMR (125 MHz,  $\text{CDCl}_3$ )  $\delta$  178.1, 143.5, 139.2, 129.8, 129.7, 124.4, 122.9, 115.9, 108.4, 76.4, 46.1, 26.1, 23.9. HRMS (ESI)  $m/z$   $[\text{M}+\text{Na}]^+$  calcd for  $\text{C}_{13}\text{H}_{15}\text{NNaO}_2$  240.0995, found 240.0987.

**(S)-3-hydroxy-1-methyl-3-(2 $\gamma^5$ -propa-1,2-dien-1-yl)indolin-2-one (3ba)**

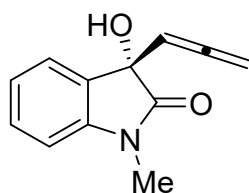

The title compound was prepared according to the general working procedure and purified by column chromatography (ethyl acetate/petroleum ether) to give the product as white solid (19.9 mg, 99% yield). MP: 135-138°C.  $[\alpha]_D^{20}$  = -36.0 ( $c$  = 0.2,  $\text{CHCl}_3$ , 97% *ee*); HPLC: Daicel Chiralpak IC, hexane: 2-propanol = 80:20, flow rate = 1.0 mL/min, T = 30°C, UV = 254 nm,  $t_R$  = 12.7 min (minor),  $t_R$  = 16.2 min (major);  $^1\text{H}$  NMR (500 MHz, Acetone)  $\delta$  7.38 – 7.31 (m, 2H), 7.06 (t,  $J$  = 7.5 Hz, 1H), 6.96 (d,  $J$  = 7.8 Hz, 1H), 5.55 (t,  $J$  = 6.6 Hz, 1H), 5.28 (s, 1H), 4.85 (dd,  $J$  = 11.5, 6.7 Hz, 1H), 4.76 (dd,  $J$  = 11.5, 6.6 Hz, 1H), 3.14 (s, 3H).  $^{13}\text{C}$  NMR (125 MHz, Acetone)  $\delta$  205.3, 175.6, 143.4, 130.3, 129.4, 124.7, 122.2, 108.3, 92.9, 77.9, 74.2, 25.3. HRMS (ESI)  $m/z$   $[\text{M}+\text{Na}]^+$  calcd for  $\text{C}_{12}\text{H}_{11}\text{NNaO}_2$  224.0682, found 224.0678.

**(S)-1-allyl-3-hydroxy-3-(2 $\gamma^5$ -propa-1,2-dien-1-yl)indolin-2-one (3bb)**

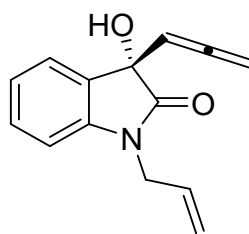

The title compound was prepared according to the general working procedure and purified by column chromatography (ethyl acetate/petroleum ether) to give the product as white solid (22.2 mg, 98% yield). MP: 106-109°C.  $[\alpha]_D^{20}$  = -47.5 ( $c$  = 0.4,  $\text{CHCl}_3$ , 92% *ee*); HPLC: Daicel Chiralpak IC, hexane: 2-propanol = 80:20, flow rate = 1.0 mL/min, T = 30°C, UV = 254 nm,  $t_R$  = 10.3 min (minor),  $t_R$  = 13.1 min (major);  $^1\text{H}$  NMR (500 MHz,  $\text{CDCl}_3$ )  $\delta$  7.41 (d,  $J$  = 7.1 Hz, 1H), 7.33 – 7.27 (m, 1H), 7.10 (t,  $J$  = 7.5 Hz, 1H), 6.83 (d,  $J$  = 7.8 Hz, 1H), 5.90 – 5.76 (m, 1H), 5.54 (t,  $J$  = 6.6 Hz, 1H), 5.26 – 5.17 (m, 2H), 5.00 – 4.92 (m, 2H), 4.43 – 4.35 (m, 1H), 4.27 – 4.20 (m, 1H).  $^{13}\text{C}$  NMR (125 MHz,  $\text{CDCl}_3$ )  $\delta$  207.6, 176.3, 142.2, 131.0, 129.8, 129.4, 124.8, 123.1, 117.7, 109.5, 92.9, 80.1, 74.5, 42.4. HRMS (ESI)  $m/z$   $[\text{M}+\text{Na}]^+$  calcd for  $\text{C}_{14}\text{H}_{13}\text{NNaO}_2$  250.0838, found 250.0834.

**(S)-3-hydroxy-1-phenyl-3-(2 $\gamma^5$ -propa-1,2-dien-1-yl)indolin-2-one (3bc)**

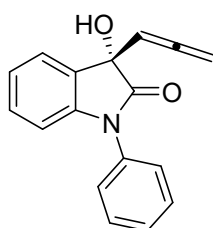

The title compound was prepared according to the general working procedure and purified by column chromatography (ethyl acetate/petroleum ether) to give the product as white solid (25.5 mg, 97% yield). MP: 75-77°C.  $[\alpha]_D^{20}$  = -38.7 ( $c$  = 0.4,  $\text{CHCl}_3$ , 97% *ee*); HPLC: Daicel Chiralpak IC, hexane: 2-propanol = 80:20, flow rate

= 1.0 mL/min, T = 30°C, UV = 254 nm,  $t_R$  = 12.9 min (major),  $t_R$  = 18.8 min (minor);  $^1\text{H}$  NMR (500 MHz,  $\text{CDCl}_3$ )  $\delta$  7.55 – 7.45 (m, 3H), 7.44 – 7.38 (m, 3H), 7.25 (t,  $J$  = 7.7 Hz, 1H), 7.13 (t,  $J$  = 7.5 Hz, 1H), 6.82 (d,  $J$  = 7.9 Hz, 1H), 5.62 (t,  $J$  = 6.5 Hz, 1H), 5.08 – 4.93 (m, 2H), 3.77 (s, 1H).  $^{13}\text{C}$  NMR (125 MHz,  $\text{CDCl}_3$ )  $\delta$  206.8, 174.9, 142.0, 132.9, 128.7, 128.6, 128.1, 127.2, 125.4, 124.0, 122.6, 108.8, 91.9, 79.1, 73.6. HRMS (ESI)  $m/z$   $[\text{M}+\text{Na}]^+$  calcd for  $\text{C}_{17}\text{H}_{13}\text{NNaO}_2$  286.0838, found 286.0839.

**(S)-1-benzyl-3-hydroxy-3-(2 $\gamma^5$ -propa-1,2-dien-1-yl)indolin-2-one (3bd)**

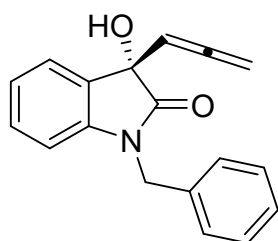

The title compound was prepared according to the general working procedure and purified by column chromatography (ethyl acetate/petroleum ether) to give the product as white solid (27.4 mg, 99% yield). MP: 124-126°C.  $[\alpha]_D^{20}$  = -54.3 ( $c$  = 0.4,  $\text{CHCl}_3$ , 97% *ee*); HPLC: Daicel Chiralpak OD-H, hexane: 2-propanol = 70:30, flow rate = 1.2 mL/min, T = 30°C, UV = 254 nm,  $t_R$  = 5.4 min (major),  $t_R$  = 7.1 min (minor);  $^1\text{H}$  NMR (500 MHz,  $\text{CDCl}_3$ )  $\delta$  7.41 (d,  $J$  = 7.2 Hz, 1H), 7.32 – 7.17 (m, 6H), 7.06 (t,  $J$  = 7.4 Hz, 1H), 6.70 (d,  $J$  = 7.8 Hz, 1H), 5.60 (t,  $J$  = 6.4 Hz, 1H), 5.07 – 4.90 (m, 3H), 4.77 (d,  $J$  = 15.7 Hz, 1H), 3.88 (s, 1H).  $^{13}\text{C}$  NMR (125 MHz,  $\text{CDCl}_3$ )  $\delta$  207.7, 176.8, 142.1, 135.3, 129.8, 129.6, 128.8, 127.7, 127.2, 124.8, 123.2, 109.6, 92.9, 80.1, 74.7, 43.9. HRMS (ESI)  $m/z$   $[\text{M}+\text{Na}]^+$  calcd for  $\text{C}_{18}\text{H}_{15}\text{NNaO}_2$  300.0995, found 300.0993.

**(S)-1-(tert-butyldimethylsilyl)-3-hydroxy-3-(2 $\gamma^5$ -propa-1,2-dien-1-yl)indolin-2-one (3be)**

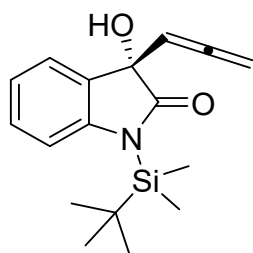

The title compound was prepared according to the general working procedure and purified by column chromatography (ethyl acetate/petroleum ether) to give the product as pale yellow oil (29.5 mg, 98% yield).  $[\alpha]_D^{20}$  = -23.6 ( $c$  = 0.125,  $\text{CHCl}_3$ , 90% *ee*); HPLC: Daicel Chiralpak OD-H, hexane: 2-propanol = 80:20, flow rate = 1.0 mL/min, T = 30°C, UV = 254 nm,  $t_R$  = 3.7 min (major),  $t_R$  = 4.1 min (minor);  $^1\text{H}$  NMR (500 MHz, Acetone)  $\delta$  7.34 (d,  $J$  = 7.3 Hz, 1H), 7.23 (t,  $J$  = 7.8 Hz, 1H), 7.10 (d,  $J$  = 8.0 Hz, 1H), 7.03 (t,  $J$  = 7.5 Hz, 1H), 5.53 (t,  $J$  = 6.7 Hz, 1H), 5.25 (s, 1H), 4.83 (dd,  $J$  = 11.4, 6.7 Hz, 1H), 4.76 (dd,  $J$  = 11.4, 6.6 Hz, 1H), 0.99 (s, 9H), 0.54 (s, 3H), 0.53 (s, 3H).  $^{13}\text{C}$  NMR (125 MHz, Acetone)  $\delta$  207.5, 183.2, 145.4, 132.6, 129.0, 124.9, 122.0, 112.8, 93.8, 77.9, 74.6, 26.0, 19.5, -3.8, -4.0. HRMS (ESI)  $m/z$   $[\text{M}+\text{Na}]^+$  calcd for  $\text{C}_{17}\text{H}_{23}\text{NNaO}_2\text{Si}$  324.1390, found 324.1384.

**(S)-3-hydroxy-3-(2 $\gamma^5$ -propa-1,2-dien-1-yl)indolin-2-one (3bf) [7]**

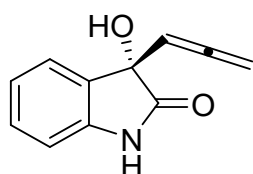

The title compound was prepared according to the general working procedure and purified by column chromatography (ethyl acetate/petroleum ether) to give the product as white solid

(18.1 mg, 97% yield).  $[\alpha]_D^{20} = -34.7$  ( $c = 0.15$ , MeOH, 94% *ee*); HPLC: Daicel Chiralpak AS-H, hexane: 2-propanol = 70:30, flow rate = 1.0 mL/min, T = 30°C, UV = 254 nm,  $t_R = 30.1$  min (major),  $t_R = 49.1$  min (minor);  $^1\text{H NMR}$  (500 MHz, DMSO)  $\delta$  10.27 (s, 1H), 7.26 – 7.17 (m, 2H), 7.00 – 6.92 (m, 1H), 6.80 (d,  $J = 7.7$  Hz, 1H), 6.34 (s, 1H), 5.48 (t,  $J = 6.6$  Hz, 1H), 4.89 (dd,  $J = 11.7, 6.6$  Hz, 1H), 4.82 (dd,  $J = 11.7, 6.6$  Hz, 1H).  $^{13}\text{C NMR}$  (125 MHz, DMSO)  $\delta$  207.4, 177.9, 141.7, 131.6, 129.6, 125.3, 122.0, 110.1, 93.6, 79.0, 74.6.

**(S)-3-hydroxy-1,5-dimethyl-3-(2 $\gamma^5$ -propa-1,2-dien-1-yl)indolin-2-one (3bg)**

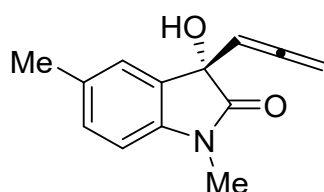

The title compound was prepared according to the general working procedure and purified by column chromatography (ethyl acetate/petroleum ether) to give the product as white solid (21.3 mg, 99% yield). MP: 145–148°C.  $[\alpha]_D^{20} = +20.9$  ( $c = 0.6$ ,  $\text{CHCl}_3$ , 94% *ee*); HPLC: Daicel Chiralpak IC, hexane: 2-propanol = 80:20, flow rate = 1.0 mL/min, T = 30°C, UV = 254 nm,  $t_R = 12.6$  min (minor),  $t_R = 15.8$  min (major);  $^1\text{H NMR}$  (500 MHz,  $\text{CDCl}_3$ )  $\delta$  7.23 (s, 1H), 7.13 (d,  $J = 7.8$  Hz, 1H), 6.73 (d,  $J = 7.9$  Hz, 1H), 5.48 (t,  $J = 6.6$  Hz, 1H), 5.03 – 4.90 (m, 2H), 3.55 (s, 1H), 3.18 (s, 3H), 2.34 (s, 3H).  $^{13}\text{C NMR}$  (125 MHz,  $\text{CDCl}_3$ )  $\delta$  206.5, 175.4, 139.6, 131.8, 129.1, 128.3, 124.5, 107.3, 91.8, 79.1, 73.4, 25.4, 20.1. HRMS (ESI)  $m/z$   $[\text{M}+\text{Na}]^+$  calcd for  $\text{C}_{13}\text{H}_{13}\text{NNaO}_2$  238.0838, found 238.0835.

**(S)-5-fluoro-3-hydroxy-1-methyl-3-(2 $\gamma^5$ -propa-1,2-dien-1-yl)indolin-2-one (3bh)**

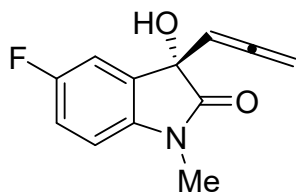

The title compound was prepared according to the general working procedure and purified by column chromatography (ethyl acetate/petroleum ether) to give the product as white solid (21.0 mg, 96% yield). MP: 143–145°C.  $[\alpha]_D^{20} = -34.5$  ( $c = 0.3$ ,  $\text{CHCl}_3$ , 91% *ee*); HPLC: Daicel Chiralpak IC, hexane: 2-propanol = 80:20, flow rate = 1.0 mL/min, T = 30°C, UV = 254 nm,  $t_R = 8.7$  min (minor),  $t_R = 10.8$  min (major);  $^1\text{H NMR}$  (500 MHz,  $\text{CDCl}_3$ )  $\delta$  7.16 (dd,  $J = 7.6, 2.6$  Hz, 1H), 7.03 (td,  $J = 8.9, 2.6$  Hz, 1H), 6.77 (dd,  $J = 8.5, 4.0$  Hz, 1H), 5.53 (t,  $J = 6.6$  Hz, 1H), 5.04 – 4.88 (m, 2H), 3.98 (s, 1H), 3.19 (s, 3H).  $^{13}\text{C NMR}$  (125 MHz,  $\text{CDCl}_3$ )  $\delta$  206.7, 175.5, 158.5 (d,  $J = 242.1$  Hz), 137.9, 129.9 (d,  $J = 7.8$  Hz), 115.0 (d,  $J = 23.8$  Hz), 112.1 (d,  $J = 25.2$  Hz), 108.1 (d,  $J = 8.1$  Hz), 91.3, 79.2, 73.6, 25.5.  $^{19}\text{F NMR}$  (470 MHz,  $\text{CDCl}_3$ )  $\delta$  -119.5. HRMS (ESI)  $m/z$   $[\text{M}+\text{H}]^+$  calcd for  $\text{C}_{12}\text{H}_{11}\text{FNO}_2$  220.0768, found 220.0763.

**(S)-5-chloro-3-hydroxy-1-methyl-3-(2 $\gamma^5$ -propa-1,2-dien-1-yl)indolin-2-one (3bi)**

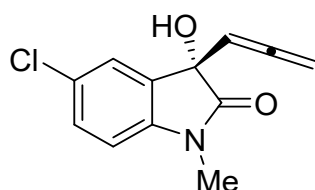

The title compound was prepared according to the general working procedure and purified by column chromatography (ethyl acetate/petroleum ether) to give the



product as white solid (22.3 mg, 95% yield). MP: 121-124°C [ $\alpha$ ]<sub>D</sub><sup>20</sup> = -42.9 (*c* = 0.2, CHCl<sub>3</sub>, 96% *ee*); HPLC: Daicel Chiralpak IC, hexane: 2-propanol = 80:20, flow rate = 1.0 mL/min, T = 30°C, UV = 254 nm, *t*<sub>R</sub> = 8.6 min (minor), *t*<sub>R</sub> = 16.0 min (major); <sup>1</sup>H NMR (500 MHz, CDCl<sub>3</sub>)  $\delta$  7.51 (d, *J* = 1.8 Hz, 1H), 7.46 (dd, *J* = 8.2, 1.9 Hz, 1H), 6.73 (d, *J* = 8.3 Hz, 1H), 5.48 (t, *J* = 6.5 Hz, 1H), 5.10 – 4.90 (m, 2H), 3.63 (s, 1H), 3.18 (s, 3H). <sup>13</sup>C NMR (125 MHz, CDCl<sub>3</sub>)  $\delta$  206.6, 175.0, 141.1, 131.7, 130.2, 127.1, 114.8, 109.1, 91.3, 79.5, 73.3, 25.5. HRMS (ESI) *m/z* [M+Na]<sup>+</sup> calcd for C<sub>12</sub>H<sub>10</sub>ClNNaO<sub>2</sub> 258.0292, found 258.0279.

**(S)-5-bromo-3-hydroxy-1-methyl-3-(2 $\gamma^5$ -propa-1,2-dien-1-yl)indolin-2-one (3bj)**

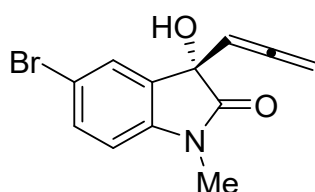

The title compound was prepared according to the general working procedure and purified by column chromatography (ethyl acetate/petroleum ether) to give the product as white solid (27.2 mg, 97% yield). MP: 123-125°C [ $\alpha$ ]<sub>D</sub><sup>20</sup> = -46.6 (*c* = 0.6, CHCl<sub>3</sub>, 93% *ee*); HPLC: Daicel Chiralpak IC, hexane: 2-propanol = 80:20, flow rate = 1.0 mL/min, T = 30°C, UV = 254 nm, *t*<sub>R</sub> = 8.2 min (minor), *t*<sub>R</sub> = 12.2 min (major); <sup>1</sup>H NMR (500 MHz, CDCl<sub>3</sub>)  $\delta$  7.38 (d, *J* = 1.9 Hz, 1H), 7.30 (dd, *J* = 8.3, 2.0 Hz, 1H), 6.77 (d, *J* = 8.3 Hz, 1H), 5.51 (t, *J* = 6.5 Hz, 1H), 5.06 – 4.91 (m, 2H), 3.91 (s, 1H), 3.18 (s, 3H). <sup>13</sup>C NMR (125 MHz, CDCl<sub>3</sub>)  $\delta$  207.7, 176.3, 141.6, 131.0, 129.7, 128.6, 125.4, 109.6, 92.3, 80.4, 74.4, 26.5. HRMS (ESI) *m/z* [M+Na]<sup>+</sup> calcd for C<sub>12</sub>H<sub>10</sub>BrNNaO<sub>2</sub> 301.9787, found 301.9779.

**(S)-6-chloro-3-hydroxy-1-methyl-3-(2 $\gamma^5$ -propa-1,2-dien-1-yl)indolin-2-one (3bk)**

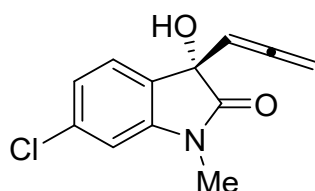

The title compound was prepared according to the general working procedure and purified by column chromatography (ethyl acetate/petroleum ether) to give the product as white solid (22.1 mg, 94% yield). MP: 144-147°C [ $\alpha$ ]<sub>D</sub><sup>20</sup> = -33.2 (*c* = 0.5, CHCl<sub>3</sub>, 93% *ee*); HPLC: Daicel Chiralpak IC, hexane: 2-propanol = 80:20, flow rate = 1.0 mL/min, T = 30°C, UV = 254 nm, *t*<sub>R</sub> = 7.9 min (minor), *t*<sub>R</sub> = 10.3 min (major); <sup>1</sup>H NMR (500 MHz, CDCl<sub>3</sub>)  $\delta$  7.31 (d, *J* = 7.9 Hz, 1H), 7.08 (dd, *J* = 7.9, 1.7 Hz, 1H), 6.85 (d, *J* = 1.6 Hz, 1H), 5.49 (t, *J* = 6.5 Hz, 1H), 5.03 – 4.90 (m, 2H), 3.60 (s, 1H), 3.18 (s, 3H). <sup>13</sup>C NMR (125 MHz, CDCl<sub>3</sub>)  $\delta$  206.7, 175.5, 143.3, 134.7, 126.5, 124.8, 122.0, 108.4, 91.3, 79.2, 73.1, 25.5. HRMS (ESI) *m/z* [M+Na]<sup>+</sup> calcd for C<sub>12</sub>H<sub>10</sub>ClNNaO<sub>2</sub> 258.0292, found 258.0289.

**(S)-7-fluoro-3-hydroxy-1-methyl-3-(2 $\gamma^5$ -propa-1,2-dien-1-yl)indolin-2-one (3bl)**

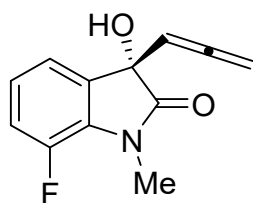

The title compound was prepared according to the general working procedure and purified by column chromatography (ethyl acetate/petroleum ether) to give the product as white solid (20.1 mg, 92% yield). MP: 81-83°C [ $\alpha$ ]<sub>D</sub><sup>20</sup> = -49.4 (*c* = 0.3,

CHCl<sub>3</sub>, 94% *ee*); HPLC: Daicel Chiralpak IC, hexane: 2-propanol = 80:20, flow rate = 1.0 mL/min, T = 30°C, UV = 254 nm, t<sub>R</sub> = 7.0 min (minor), t<sub>R</sub> = 7.9 min (major); <sup>1</sup>H NMR (500 MHz, Acetone) δ 7.20 (d, *J* = 7.2 Hz, 1H), 7.17 – 7.10 (m, 1H), 7.10 – 7.01 (m, 1H), 5.54 (t, *J* = 6.6 Hz, 1H), 5.46 (s, 1H), 4.87 (dd, *J* = 11.6, 6.7 Hz, 1H), 4.79 (dd, *J* = 11.6, 6.6 Hz, 1H), 3.33 (s, 3H). <sup>13</sup>C NMR (125 MHz, Acetone) δ 207.7, 175.4, 147.5 (d, *J* = 241.7 Hz), 133.4 (d, *J* = 2.7 Hz), 129.7 (d, *J* = 8.3 Hz), 123.1 (d, *J* = 6.3 Hz), 120.9 (d, *J* = 3.0 Hz), 117.1 (d, *J* = 19.4 Hz), 92.7, 78.2, 74.2, 27.84 (d, *J* = 5.7 Hz). <sup>19</sup>F NMR (470 MHz, CDCl<sub>3</sub>) δ -138.3. HRMS (ESI) *m/z* [M+Na]<sup>+</sup> calcd for C<sub>12</sub>H<sub>10</sub>FNNaO<sub>2</sub> 242.0588, found 242.0586.

**(S)-7-chloro-3-hydroxy-1-methyl-3-(2γ<sup>5</sup>-propa-1,2-dien-1-yl)indolin-2-one (3bm)**

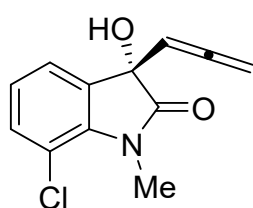

The title compound was prepared according to the general working procedure and purified by column chromatography (ethyl acetate/petroleum ether) to give the product as white solid (22.1 mg, 94% yield). MP: 120-124°C [ $\alpha$ ]<sub>D</sub><sup>20</sup> = -35.3 (*c* = 0.25, CHCl<sub>3</sub>, 95% *ee*); HPLC: Daicel Chiralpak IC, hexane: 2-propanol = 80:20, flow rate = 1.0 mL/min, T = 30°C, UV = 254 nm, t<sub>R</sub> = 7.3 min (minor), t<sub>R</sub> = 8.1 min (major); <sup>1</sup>H NMR (500 MHz, Acetone) δ 7.35 – 7.27 (m, 2H), 7.06 (t, *J* = 7.8 Hz, 1H), 5.54 (t, *J* = 6.6 Hz, 1H), 5.45 (s, 1H), 4.88 (dd, *J* = 11.6, 6.7 Hz, 1H), 4.80 (dd, *J* = 11.7, 6.6 Hz, 1H), 3.49 (s, 3H). <sup>13</sup>C NMR (125 MHz, Acetone) δ 207.7, 176.0, 139.1, 133.4, 131.4, 123.7, 123.5, 114.8, 92.7, 78.3, 73.8, 28.8. HRMS (ESI) *m/z* [M+H]<sup>+</sup> calcd for C<sub>12</sub>H<sub>11</sub>ClNO<sub>2</sub> 236.0473, found 236.0471.

**(S)-7-bromo-3-hydroxy-1-methyl-3-(2γ<sup>5</sup>-propa-1,2-dien-1-yl)indolin-2-one (3bn)**

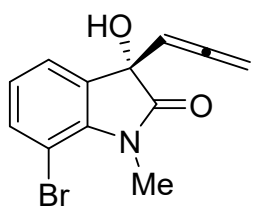

The title compound was prepared according to the general working procedure and purified by column chromatography (ethyl acetate/petroleum ether) to give the product as white solid (26.6 mg, 95% yield). MP: 124-126°C [ $\alpha$ ]<sub>D</sub><sup>20</sup> = -58.5 (*c* = 0.4, CHCl<sub>3</sub>, 93% *ee*); HPLC: Daicel Chiralpak IC, hexane: 2-propanol = 80:20, flow rate = 1.0 mL/min, T = 30°C, UV = 254 nm, t<sub>R</sub> = 7.2 min (minor), t<sub>R</sub> = 8.0 min (major); <sup>1</sup>H NMR (500 MHz, CDCl<sub>3</sub>) δ 7.45 – 7.41 (m, 1H), 7.33 (dd, *J* = 7.3, 1.2 Hz, 1H), 6.99 – 6.92 (m, 1H), 5.48 (t, *J* = 6.6 Hz, 1H), 5.00 – 4.93 (m, 2H), 3.71 (s, 1H), 3.57 (s, 3H). <sup>13</sup>C NMR (125 MHz, CDCl<sub>3</sub>) δ 206.6, 176.0, 139.3, 134.4, 131.4, 123.4, 122.9, 101.7, 91.6, 79.3, 72.8, 29.0. HRMS (ESI) *m/z* [M+Na]<sup>+</sup> calcd for C<sub>12</sub>H<sub>10</sub>BrNNaO<sub>2</sub> 301.9787, found 301.9779.

**(S)-3-hydroxy-1-methyl-3-(2γ<sup>5</sup>-propa-1,2-dien-1-yl)-7-(trifluoromethyl)indolin-2-one (3bo)**

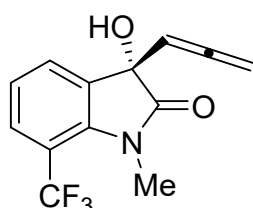

The title compound was prepared according to the general working procedure and purified by column chromatography (ethyl acetate/petroleum ether) to give the product as white solid

(24.5 mg, 91% yield). MP: 66-68°C [ $\alpha$ ]<sub>D</sub><sup>20</sup> = -37.8 (*c* = 0.25, CHCl<sub>3</sub>, 92% *ee*); HPLC: Daicel Chiralpak IC, hexane: 2-propanol = 80:20, flow rate = 1.0 mL/min, T = 30°C, UV = 254 nm, *t*<sub>R</sub> = 4.9 min (minor), *t*<sub>R</sub> = 5.2 min (major); <sup>1</sup>H NMR (500 MHz, CDCl<sub>3</sub>) δ 7.69 – 7.54 (m, 2H), 7.19 (t, *J* = 7.7 Hz, 1H), 5.50 (t, *J* = 6.5 Hz, 1H), 5.06 – 4.90 (m, 2H), 3.75 (s, 1H), 3.40 (s, 3H). <sup>13</sup>C NMR (125 MHz, CDCl<sub>3</sub>) δ 207.7, 177.5, 141.0, 131.9, 128.4, 127.7 (q, *J* = 6.1 Hz), 123.4 (q, *J* = 270.1 Hz), 122.6, 113.1 (q, *J* = 32.9 Hz), 92.5, 80.5, 72.7, 29.1 (q, *J* = 6.3 Hz). <sup>19</sup>F NMR (470 MHz, CDCl<sub>3</sub>) δ -53.3. HRMS (ESI) *m/z* [M+Na]<sup>+</sup> calcd for C<sub>13</sub>H<sub>10</sub>F<sub>3</sub>NNaO<sub>2</sub> 292.0556, found 292.0558.

**(2*S*)-4-iodo-1'-methyl-4,5-dihydro-3*H*-spiro[furan-2,3'-indolin]-2'-one (4a)** <sup>[11]</sup>

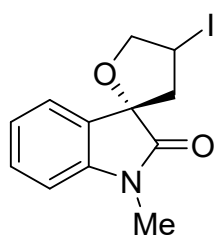

The title compound was prepared according to the general working procedure and purified by column chromatography (ethyl acetate/petroleum ether) to give the product as white solid (37.5 mg, 38% yield). [ $\alpha$ ]<sub>D</sub><sup>20</sup> = -5.0 (*c* = 0.35, CHCl<sub>3</sub>, 90% *ee*, 4:1 *dr*); HPLC: Daicel Chiralpak IC, hexane: 2-propanol = 70:30, flow rate = 1.0 mL/min, T = 30°C, UV = 254 nm, *t*<sub>R</sub> = 8.9 min (minor), *t*<sub>R</sub> = 13.6 min (major); <sup>1</sup>H NMR (500 MHz, CDCl<sub>3</sub>) δ 7.61 – 7.57 (m, 0.8H), 7.47 – 7.43 (m, 0.2H), 7.38 – 7.34 (m, 0.2H), 7.32 – 7.28 (m, 0.8H), 7.15 – 7.11 (m, 0.2H), 7.10 – 7.05 (m, 0.8H), 6.88 – 6.84 (m, 0.2H), 6.81 – 6.77 (m, 0.8H), 4.94 – 4.76 (m, 1H), 4.37 (dd, *J* = 9.6, 3.8 Hz, 1H), 4.15 (d, *J* = 9.6 Hz, 1H), 3.20 (s, 0.6H), 3.15 (s, 2.4H), 2.72 – 2.69 (m, 0.2H), 2.67 – 2.62 (m, 0.8H), 2.21 – 2.17 (m, 0.8H), 2.17 – 2.15 (m, 0.2H). <sup>13</sup>C NMR (125 MHz, CDCl<sub>3</sub>) δ 176.8, 142.6, 129.1, 128.8, 124.3, 122.3, 107.2, 81.9, 76.5, 72.0, 42.9, 25.1.

**(*S*)-3-allyl-3-methoxy-1-methylindolin-2-one (4b)** <sup>[12]</sup>

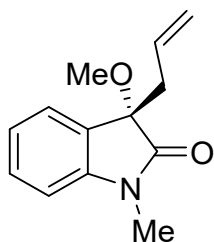

The title compound was prepared according to the general working procedure and purified by column chromatography (ethyl acetate/petroleum ether) to give the product as yellow oil (35.6 mg, 82% yield). [ $\alpha$ ]<sub>D</sub><sup>20</sup> = -17.9 (*c* = 0.35, CHCl<sub>3</sub>, 90% *ee*); HPLC: Daicel Chiralpak IC, hexane: 2-propanol = 90:10, flow rate = 1.0 mL/min, T = 30°C, UV = 254 nm, *t*<sub>R</sub> = 12.6 min (minor), *t*<sub>R</sub> = 13.9 min (major); <sup>1</sup>H NMR (500 MHz, CDCl<sub>3</sub>) δ 7.49 – 7.30 (m, 2H), 7.22 – 7.06 (m, 1H), 6.85 (d, *J* = 7.5 Hz, 1H), 5.76 – 5.47 (m, 1H), 5.22 – 4.97 (m, 2H), 3.21 (s, 3H), 3.03 (s, 3H), 2.75 (dd, *J* = 12.6, 5.8 Hz, 1H), 2.61 (dd, *J* = 12.8, 8.0 Hz, 1H). <sup>13</sup>C NMR (125 MHz, CDCl<sub>3</sub>) δ 174.7, 142.9, 129.6, 128.8, 125.7, 123.5, 121.9, 118.6, 107.2, 81.5, 76.4, 76.0, 75.8, 52.0, 40.9, 25.0.

**(*S*)-1'-methyl-5*H*-spiro[furan-2,3'-indolin]-2'-one (4c)**

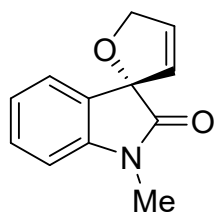

The title compound was prepared according to the general working procedure and purified by column chromatography (ethyl acetate/petroleum ether) to give the product as white solid (17.5

mg, 87% yield). MP: 68-71°C [ $\alpha$ ]<sub>D</sub><sup>20</sup> = -15.9 (*c* = 0.7, CHCl<sub>3</sub>, 91% *ee*); HPLC: Daicel Chiralpak AD-H, hexane: 2-propanol = 90:10, flow rate = 1.0 mL/min, T = 30°C, UV = 254 nm, *t*<sub>R</sub> = 8.3 min (minor), *t*<sub>R</sub> = 10.2 min (major); <sup>1</sup>H NMR (500 MHz, CDCl<sub>3</sub>)  $\delta$  7.32 (t, *J* = 7.7 Hz, 1H), 7.22 (d, *J* = 7.2 Hz, 1H), 7.06 (t, *J* = 7.3 Hz, 1H), 6.82 (d, *J* = 7.7 Hz, 1H), 6.40 (d, *J* = 6.0 Hz, 1H), 5.66 – 5.60 (m, 1H), 5.10 (dd, *J* = 13.0, 1.2 Hz, 1H), 4.99 (dd, *J* = 12.9, 1.5 Hz, 1H), 3.19 (s, 3H). <sup>13</sup>C NMR (125 MHz, CDCl<sub>3</sub>)  $\delta$  174.5, 142.6, 130.3, 129.2, 127.9, 125.9, 123.8, 122.1, 107.4, 89.7, 76.2, 25.3. HRMS (ESI) *m/z* [M+H]<sup>+</sup> calcd for C<sub>12</sub>H<sub>12</sub>NO<sub>2</sub> 202.0863, found 202.0864.

## 1.5 NMR experiment and DFT calculations

### NMR experiment, $^{13}\text{C}$ NMR (125 MHz)

$^{13}\text{C}$  NMR of **2b** (MeOD)

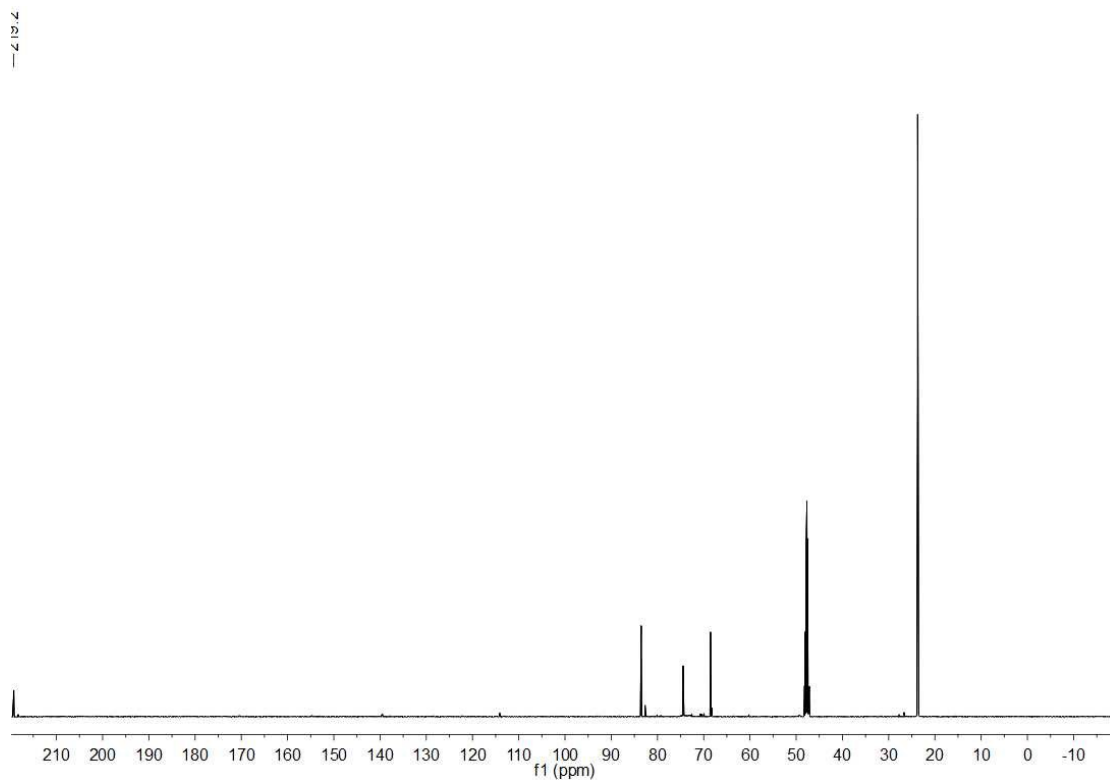

A mixture of  $\text{Zn}(\text{OTf})_2$  (36 mg, 0.1 mmol), the ligand (**L**<sub>2</sub>, 46 mg, 0.1 mmol) in MeOD (1 mL) with  $\text{Cs}_2\text{CO}_3$  (33 mg, 0.1 mmol) was stirred at room temperature for 2 h. Allenylborate **2b** (0.1 mmol) was added in one portion and was stirred at 10°C for 2 h. The reaction mixture was directly characterized by NMR experiment.

$^{13}\text{C}$  NMR of reaction mixture (MeOD)

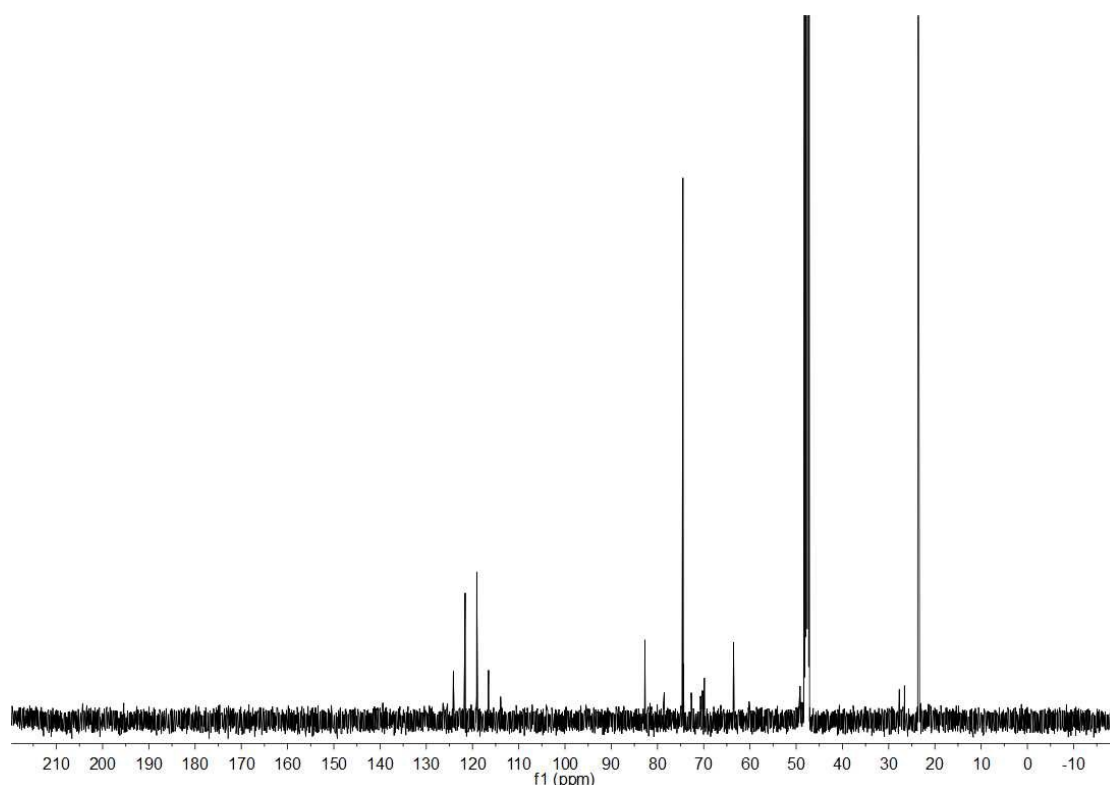

According to the results of NMR experiment, we found that when allenylborate **2b** was mixed with **L-Zn**, the signal peak of 219.4 ppm in the  $^{13}\text{C}$  NMR disappeared. It means that the structure of allene has changed.

### DFT calculations

All the calculations were performed using Gaussian 16 software packages.<sup>[13]</sup> The geometry of all reactants and transition states were optimized using the (U)B3LYP<sup>[14]</sup>-D3(Becke-Johnson damping function)<sup>[15]</sup> in acetone or isopropyl alcohol (using PCM solvation model). In these geometry optimizations, a mixed basis set of SDD<sup>[16]</sup> for Zn, while 6-31G(d)<sup>[17]</sup> for all the other atoms was used. Vibrational frequency analysis was calculated at the same level of theory to validate each structure as either a minimum or a transition state and to evaluate its zero-point energy and thermal corrections at 298 K. For each transition state, the intrinsic reaction coordinate (IRC) analysis was conducted to ensure that it connects the right reactant and product.<sup>[18]</sup> To obtain more accurate energies, solution-phase single point energy calculations were performed at the (U)B3LYP-D3(BJ)/6-311+G(d,p).

**Table 3. Thermal correction of Gibbs free energy (TCG, hartree) and single point energies (SP, hartree) in solvent for all species involved in this study**

| Compounds    | TCG (acetone) | SP(acetone) | Compounds    | TCG ( <i>i</i> -PrOH) | SP ( <i>i</i> -PrOH) |
|--------------|---------------|-------------|--------------|-----------------------|----------------------|
| <b>Int-I</b> | 0.415232      | 1777.059207 | <b>Int-I</b> | 0.412343              | -1777.053494         |

|                 |          |              |                 |          |              |
|-----------------|----------|--------------|-----------------|----------|--------------|
| <b>1a</b>       | 0.109157 | -552.580272  | <b>1a</b>       | 0.109155 | -552.580196  |
| <b>2a</b>       | 0.212617 | -528.796929  | <b>2b</b>       | 0.190918 | -527.554852  |
| <b>Int-IIA</b>  | 0.787645 | -2858.485677 | <b>Int-IIB</b>  | 0.763119 | -2857.24235  |
| <b>TS-A</b>     | 0.790444 | -2858.485427 | <b>IntIIIB</b>  | 0.763214 | -2857.233471 |
| <b>Int-IIIA</b> | 0.79265  | -2858.507444 | <b>TS-B</b>     | 0.765756 | -2857.231035 |
| <b>Int-IVA</b>  | 0.349374 | -1081.432443 | <b>Int-IVB</b>  | 0.765215 | -2857.252993 |
| <b>(S)-3aa</b>  | 0.188321 | -670.551132  | <b>Int-VB</b>   | 0.324663 | -1080.180322 |
| <b>Int-IID</b>  | 0.787925 | -2858.491008 | <b>(S)-3ba</b>  | 0.162685 | -669.298379  |
| <b>TS-D</b>     | 0.789956 | -2858.488174 | <b>TS-C</b>     | 0.766829 | -2857.234215 |
| <b>Int-IIID</b> | 0.792297 | -2858.512996 | <b>Int-IIIC</b> | 0.76899  | -2857.25556  |
| <b>Int-IVD</b>  | 0.348914 | -1081.432854 | <b>Int-IVC</b>  | 0.325249 | -1080.164429 |
| <b>(R)-3aa</b>  | 0.18859  | -670.550172  | <b>(S)-3ba'</b> | 0.164318 | -669.292119  |
|                 |          |              | <b>Int-IIIE</b> | 0.762789 | -2857.243025 |
|                 |          |              | <b>Int-IIIE</b> | 0.762779 | -2857.236824 |
|                 |          |              | <b>TS-E</b>     | 0.765342 | -2857.230146 |
|                 |          |              | <b>Int-IVE</b>  | 0.767475 | -2857.249998 |
|                 |          |              | <b>Int-VE</b>   | 0.324586 | -1080.179922 |
|                 |          |              | <b>(R)-3ba</b>  | 0.162687 | -669.298379  |
|                 |          |              | <b>TS-F</b>     | 0.765489 | -2857.233518 |
|                 |          |              | <b>Int-IIIF</b> | 0.768939 | -2857.256886 |
|                 |          |              | <b>Int-IVF</b>  | 0.325494 | -1080.170594 |
|                 |          |              | <b>(R)-3ba'</b> | 0.164217 | -669.294551  |

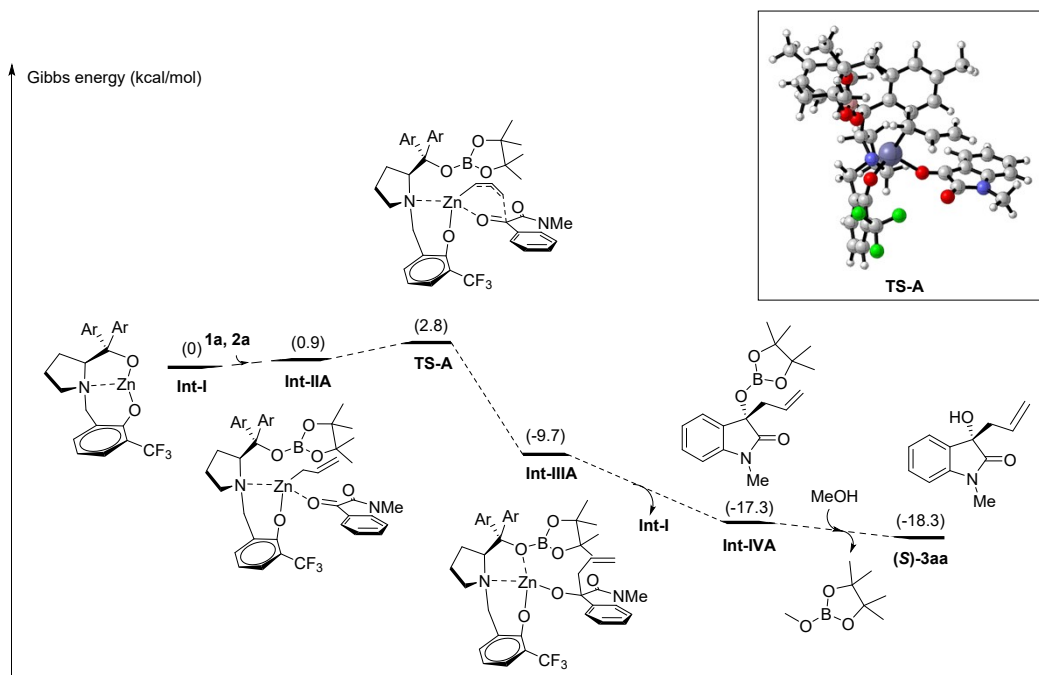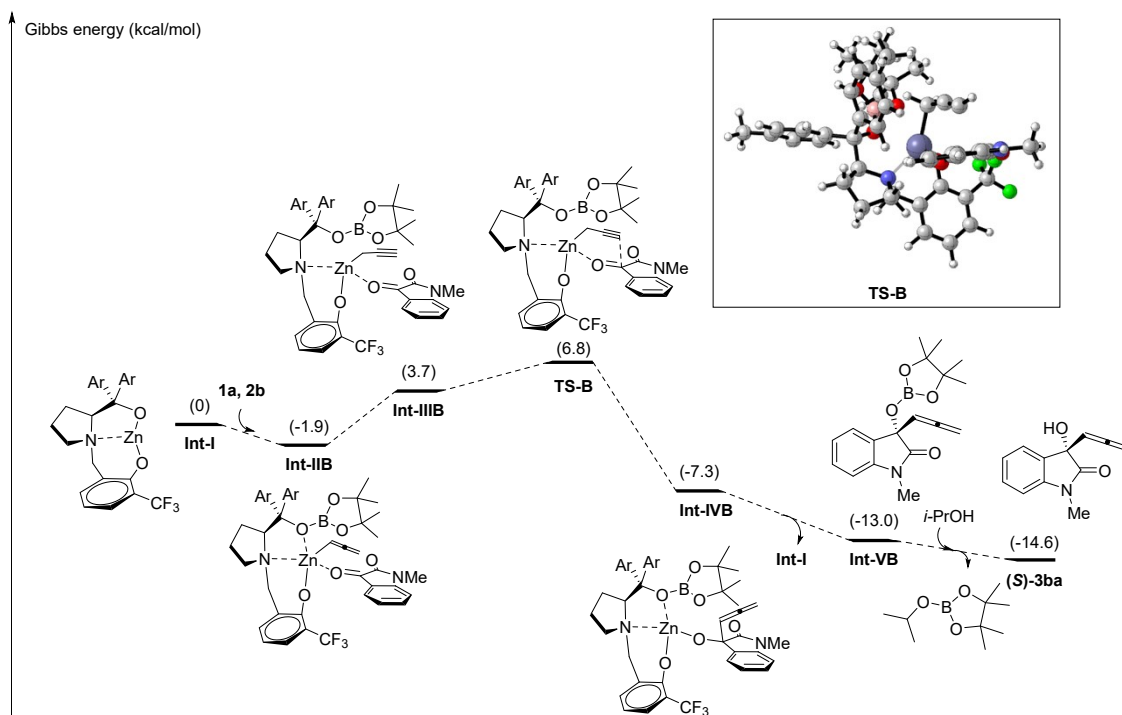



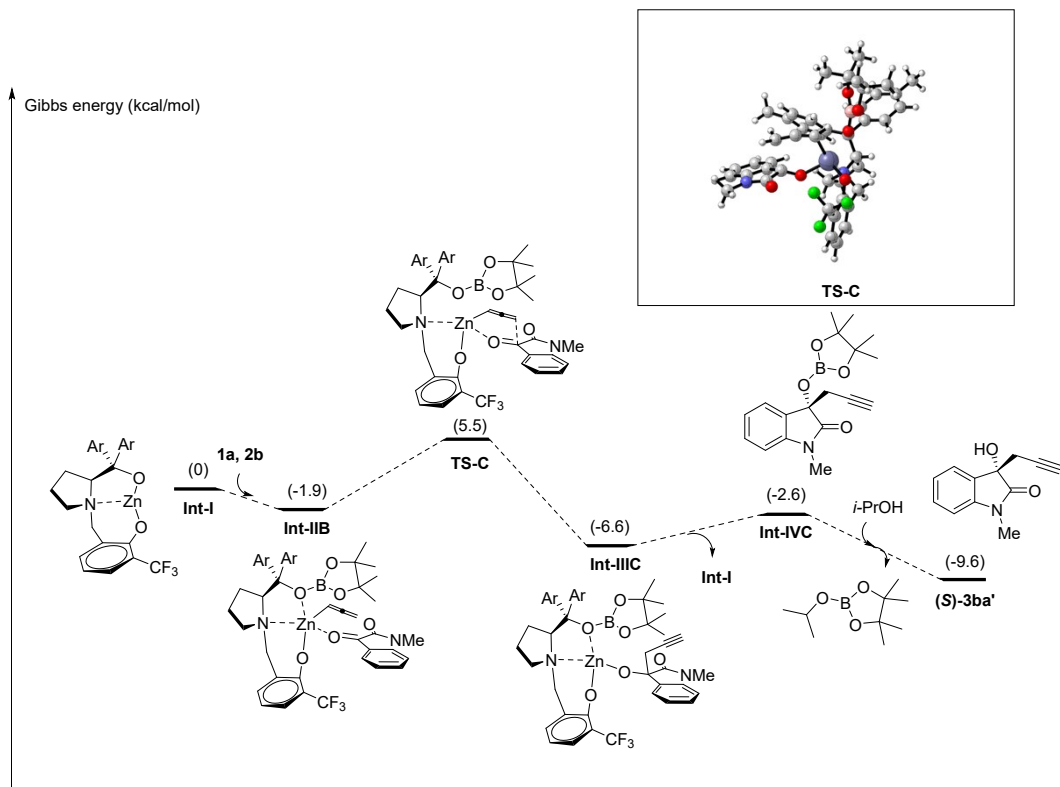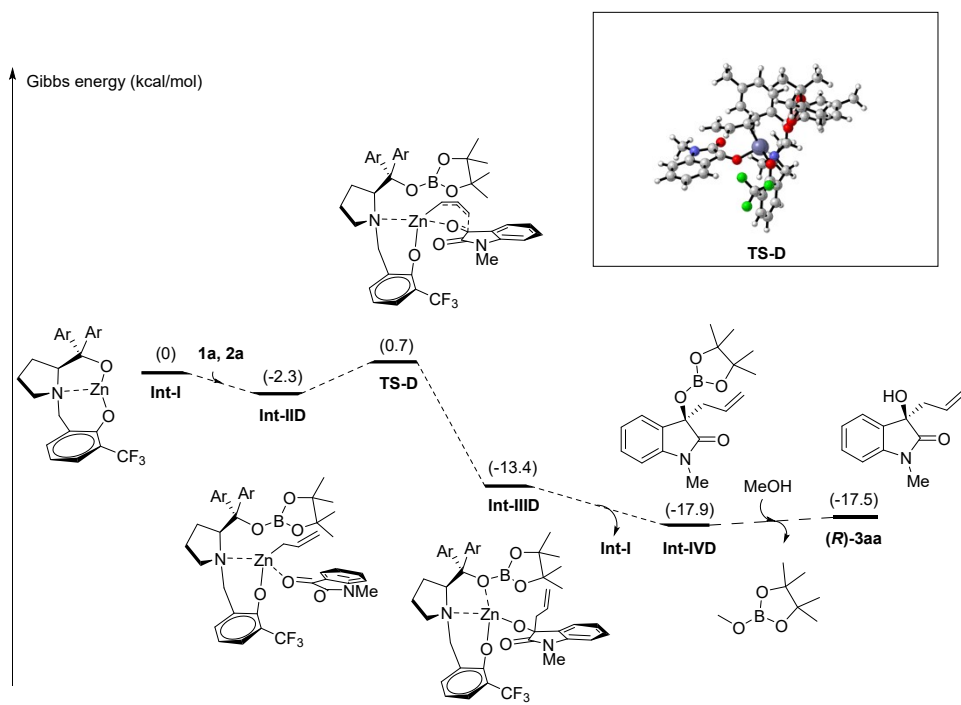

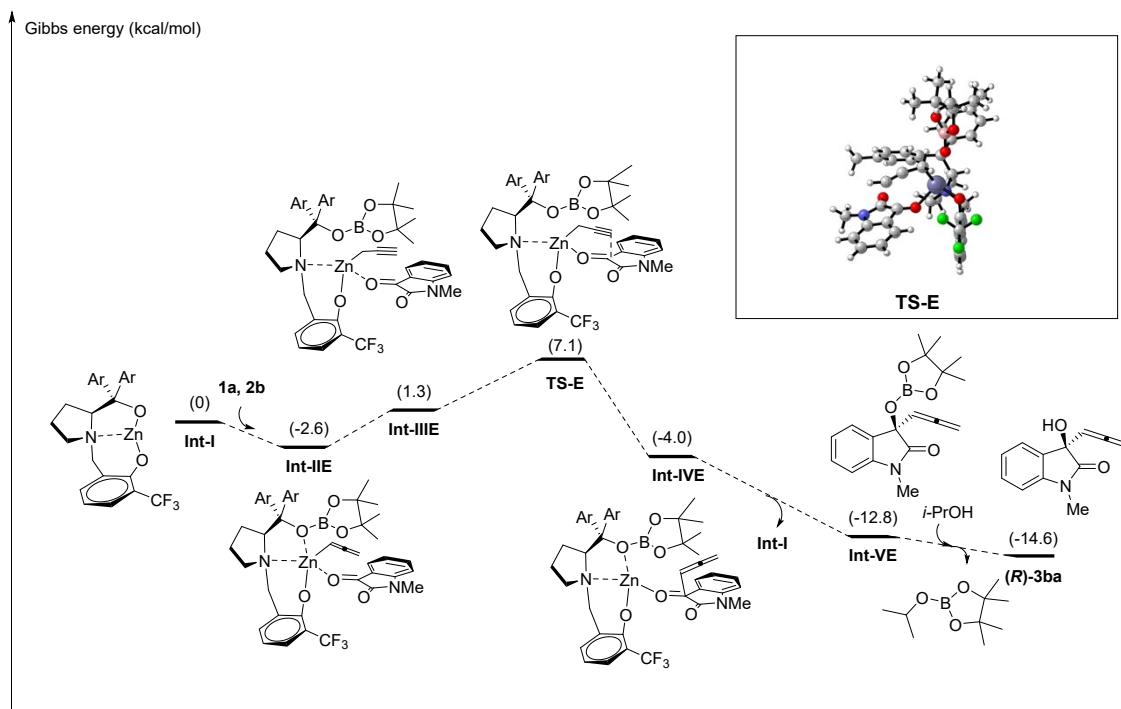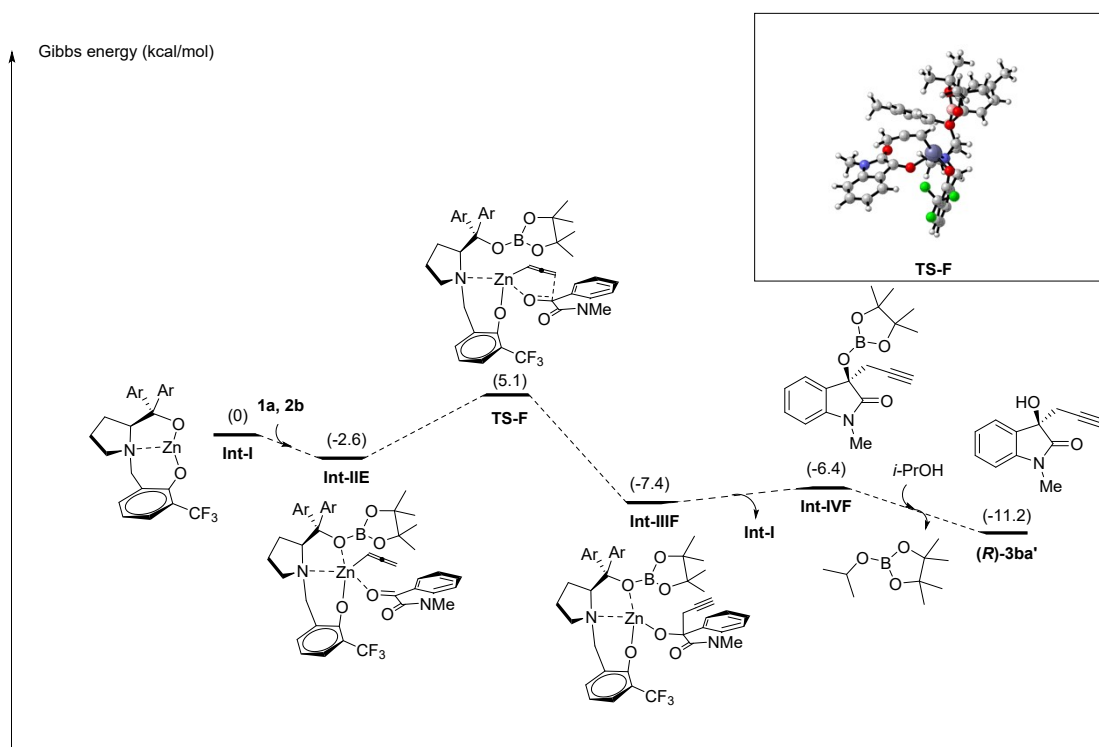

**Scheme 1.** Gibbs energy profiles for the zinc-catalyzed enantioselective allylation and allenylation of **1a** with **2**. Free energies in solution (in kcal/mol) at the (U)B3LYP-D3(BJ)/6-311+G(d,p)SDD/PCM//((U)B3LYP-D3(BJ)/6-31G(d)-SDD/PCM level are displayed. (b) 3D structures were generated by CYLview, key bond distances shown in units of Å [19].

From the calculation results, the energy barrier of **TS-B** involving propargylzinc

(3.1 kcal/mol) is smaller than that of **TS-C** involving allenylzinc (7.4 kcal/mol). Therefore, the allenylation product of isatin is easier to obtain and it is consistent with our experimental results.

The energy barrier of **TS-A** (1.9 kcal/mol) leading to (*S*)-**3aa** is smaller than that of **TS-D** (3.0 kcal/mol) leading to (*R*)-**3aa**. Therefore, the (*S*)-**3aa** is easier to obtain and it is consistent with our experimental results.

The energy barrier of **TS-B** (3.1 kcal/mol) leading to (*S*)-**3ba** is smaller than that of **TS-E** (5.8 kcal/mol) leading to (*R*)-**3ba**. Therefore, the (*S*)-**3ba** is easier to obtain and it is consistent with our experimental results.

Int-I (acetone)

|   |             |             |             |
|---|-------------|-------------|-------------|
| N | 0.28973300  | -0.42937300 | 1.02903100  |
| C | -1.14808300 | -0.82715000 | 1.02077100  |
| H | -1.18390700 | -1.90080100 | 0.83003400  |
| C | -1.65427500 | -0.51320100 | 2.44269200  |
| H | -1.58059800 | -1.42130500 | 3.04826000  |
| H | -2.70621300 | -0.22418600 | 2.45367300  |
| C | -0.69904400 | 0.57523900  | 2.99808700  |
| H | -0.23483600 | 0.23959400  | 3.92971400  |
| H | -1.21581100 | 1.51404800  | 3.21019100  |
| C | 0.36221400  | 0.77953600  | 1.89325300  |
| H | 1.37855300  | 0.89074500  | 2.27377300  |
| H | 0.12866200  | 1.65282400  | 1.28452600  |
| C | -1.87887300 | -0.19832700 | -0.24169500 |
| C | -3.26695600 | -0.86077900 | -0.34282600 |
| C | -4.48016800 | -0.17305100 | -0.25686100 |
| C | -3.32324600 | -2.24624900 | -0.57477200 |
| C | -5.70146600 | -0.84457000 | -0.37513000 |
| H | -4.48991500 | 0.90007500  | -0.11188600 |
| C | -4.53801300 | -2.91316300 | -0.68924000 |
| H | -2.39929800 | -2.80285200 | -0.69151200 |
| C | -5.75646900 | -2.22376700 | -0.58609000 |
| H | -6.62657300 | -0.27690400 | -0.30719500 |
| H | -4.54426000 | -3.98562600 | -0.87105200 |
| C | -1.96787700 | 1.34234300  | -0.19409700 |
| C | -1.42652900 | 2.09187800  | -1.24466900 |
| C | -2.57885500 | 2.06016100  | 0.84891600  |
| C | -1.43634500 | 3.48854400  | -1.23010500 |
| H | -1.00009400 | 1.56646700  | -2.09043500 |
| C | -2.58943700 | 3.45295200  | 0.86397300  |
| H | -3.06324300 | 1.53984000  | 1.66442000  |

|    |             |             |             |
|----|-------------|-------------|-------------|
| C  | -2.00399300 | 4.19844400  | -0.16881300 |
| H  | -0.99830300 | 4.03235500  | -2.06395700 |
| H  | -3.06610900 | 3.96981100  | 1.69362400  |
| C  | 2.64788000  | -1.13977700 | 1.37233100  |
| C  | 3.46251600  | -1.11613200 | 2.50643800  |
| C  | 4.58305900  | -0.48198200 | 0.05204000  |
| C  | 4.81957200  | -0.79723000 | 2.43854300  |
| H  | 3.01597300  | -1.35913200 | 3.46787700  |
| C  | 5.37389200  | -0.47763000 | 1.20238900  |
| H  | 5.43058300  | -0.79147700 | 3.33498800  |
| H  | 6.42300900  | -0.21596900 | 1.12363200  |
| C  | 5.17894500  | -0.11469600 | -1.27220500 |
| O  | 2.52180100  | -0.84279300 | -1.03868600 |
| F  | 5.10714900  | -1.11766200 | -2.18181700 |
| F  | 4.57079400  | 0.96046700  | -1.83784100 |
| F  | 6.49328300  | 0.20762500  | -1.16639200 |
| C  | 1.19224400  | -1.51352400 | 1.51571800  |
| H  | 0.96112400  | -2.40545900 | 0.92215100  |
| H  | 0.97729400  | -1.76083900 | 2.56363300  |
| C  | 3.20717500  | -0.82066500 | 0.10259100  |
| Zn | 0.68308800  | -0.49243700 | -1.06129800 |
| O  | -1.14649700 | -0.60500600 | -1.38102300 |
| C  | -7.07274900 | -2.95327000 | -0.69997000 |
| H  | -7.24363700 | -3.60320400 | 0.16777300  |
| H  | -7.91173200 | -2.25329500 | -0.76138200 |
| H  | -7.09843400 | -3.59396700 | -1.58918400 |
| C  | -1.98583800 | 5.70666400  | -0.12780000 |
| H  | -1.21564100 | 6.07416800  | 0.56287700  |
| H  | -1.77178100 | 6.12933600  | -1.11442100 |
| H  | -2.94472900 | 6.10941500  | 0.21690200  |

**1a (acetone)**

|   |             |             |             |
|---|-------------|-------------|-------------|
| C | 2.91503600  | 0.51239500  | 0.00007400  |
| C | 2.73939300  | -0.87674200 | 0.00010100  |
| C | 1.46637000  | -1.46710300 | 0.00003300  |
| C | 0.37036600  | -0.61726300 | -0.00015100 |
| C | 0.53380400  | 0.78377400  | -0.00013100 |
| C | 1.80220800  | 1.35689100  | 0.00000800  |
| N | -0.99444800 | -0.96342800 | -0.00024900 |
| C | -1.78680100 | 0.16048100  | 0.00007400  |
| O | -3.00383300 | 0.20778400  | 0.00023000  |
| H | 3.91633700  | 0.92959000  | 0.00014200  |
| H | 3.61249400  | -1.52227400 | 0.00021300  |
| H | 1.35265900  | -2.54521300 | 0.00013400  |

|   |             |             |             |
|---|-------------|-------------|-------------|
| H | 1.91098700  | 2.43700000  | -0.00000800 |
| C | -1.50171700 | -2.32261600 | -0.00000600 |
| H | -1.16566100 | -2.85785100 | 0.89363700  |
| H | -2.59056600 | -2.26644800 | -0.00260400 |
| H | -1.16144100 | -2.85950000 | -0.89103200 |
| C | -0.80268600 | 1.37832000  | -0.00006900 |
| O | -1.16235500 | 2.53970000  | -0.00002100 |

**2a**

|   |             |             |             |
|---|-------------|-------------|-------------|
| C | 4.06398100  | -0.46053200 | 0.61136000  |
| C | 2.31146200  | 0.31176900  | -1.03630000 |
| B | 0.80495200  | 0.16638200  | -0.59424600 |
| C | -1.17681700 | -0.81923600 | -0.04526000 |
| C | -1.25669500 | 0.72926700  | 0.20674000  |
| O | 0.14713300  | 1.12776600  | 0.13148600  |
| C | -1.80448400 | 1.13107500  | 1.57028800  |
| C | -1.98639300 | 1.48700800  | -0.90533400 |
| C | -2.34311300 | -1.40578900 | -0.82998900 |
| C | -0.93065300 | -1.62741900 | 1.23136700  |
| H | 4.64513000  | -0.31151800 | 1.51760700  |
| H | 4.23358600  | -1.38860100 | 0.06847800  |
| H | 2.41325400  | 1.20731800  | -1.66674300 |
| H | 2.61901000  | -0.55359700 | -1.63347700 |
| H | -1.80585300 | 2.22188200  | 1.65979500  |
| H | -2.83502600 | 0.77979400  | 1.68807900  |
| H | -1.20104000 | 0.72197900  | 2.38325200  |
| H | -3.06263700 | 1.29167500  | -0.88129500 |
| H | -1.82775500 | 2.56062600  | -0.76690800 |
| H | -1.60360000 | 1.20948400  | -1.89228700 |
| H | -2.18839900 | -2.47994600 | -0.97172400 |
| H | -3.28159400 | -1.26778100 | -0.28274700 |
| H | -2.44131900 | -0.94165800 | -1.81354200 |
| H | -1.81558300 | -1.63729000 | 1.87462600  |
| H | -0.69121100 | -2.65938900 | 0.95808100  |
| H | -0.08919800 | -1.22132200 | 1.80130800  |
| C | 3.18656300  | 0.44986900  | 0.18340700  |
| H | 3.04448400  | 1.36186500  | 0.76414000  |
| O | 0.03785200  | -0.94045400 | -0.85062200 |

**Int-IIA**

|   |            |             |            |
|---|------------|-------------|------------|
| N | 0.13624500 | 0.35560800  | 2.03554400 |
| C | 1.51940200 | -0.24901000 | 2.22366900 |
| H | 2.13477800 | 0.55874400  | 2.62300200 |
| C | 1.40798100 | -1.33199200 | 3.31490600 |

|   |             |             |             |
|---|-------------|-------------|-------------|
| H | 2.29170200  | -1.32351900 | 3.95637700  |
| H | 1.33141400  | -2.33233100 | 2.88372100  |
| C | 0.12017600  | -0.95910300 | 4.06379500  |
| H | 0.32249000  | -0.18915400 | 4.81641100  |
| H | -0.33783900 | -1.81083500 | 4.57413200  |
| C | -0.77278800 | -0.40459400 | 2.95345300  |
| H | -1.56824800 | 0.25667200  | 3.29771200  |
| H | -1.25169700 | -1.20405200 | 2.39106000  |
| C | 2.26254800  | -0.64374200 | 0.91739200  |
| C | 3.73976300  | -0.74763500 | 1.30523300  |
| C | 4.32247600  | -1.97916000 | 1.61807200  |
| C | 4.50685500  | 0.41204900  | 1.47331300  |
| C | 5.64404000  | -2.04978000 | 2.06057400  |
| H | 3.74583900  | -2.89176500 | 1.51541100  |
| C | 5.82769600  | 0.33673400  | 1.90628000  |
| H | 4.07092700  | 1.38383200  | 1.26504900  |
| C | 6.42408000  | -0.89689000 | 2.20264800  |
| H | 6.07434800  | -3.01968100 | 2.29670100  |
| H | 6.40474000  | 1.25114100  | 2.01879800  |
| C | 1.77497000  | -1.88365000 | 0.16401500  |
| C | 2.53516600  | -2.35893900 | -0.91738100 |
| C | 0.56940000  | -2.53588800 | 0.43664900  |
| C | 2.08618700  | -3.41360900 | -1.70714300 |
| H | 3.47833700  | -1.88526100 | -1.15320900 |
| C | 0.12699900  | -3.60230200 | -0.34615300 |
| H | -0.05857700 | -2.20756800 | 1.24998300  |
| C | 0.86735100  | -4.05215000 | -1.44276100 |
| H | 2.69473300  | -3.74591400 | -2.54448400 |
| H | -0.81719800 | -4.08089900 | -0.10530800 |
| C | -1.05021700 | 2.57573700  | 2.39835200  |
| C | -1.72716000 | 3.02620200  | 3.53022300  |
| C | -2.65802200 | 3.75853900  | 1.00823900  |
| C | -2.86498900 | 3.83257300  | 3.42376100  |
| H | -1.34877100 | 2.75201700  | 4.51310600  |
| C | -3.31683700 | 4.20127200  | 2.15762300  |
| H | -3.38262400 | 4.17670400  | 4.31316600  |
| H | -4.19004600 | 4.83675500  | 2.05532400  |
| C | -3.12209400 | 4.17451800  | -0.35007100 |
| O | -0.89727700 | 2.48304900  | 0.02712700  |
| F | -2.19090000 | 4.91157600  | -1.01364400 |
| F | -3.41966100 | 3.12785900  | -1.15714900 |
| F | -4.24238200 | 4.94337400  | -0.29545100 |
| C | 0.22629600  | 1.79590500  | 2.49690600  |
| H | 0.98983700  | 2.25424700  | 1.86343500  |

|    |             |             |             |
|----|-------------|-------------|-------------|
| H  | 0.59061400  | 1.80933500  | 3.53150300  |
| C  | -1.51694100 | 2.91986800  | 1.10038500  |
| Zn | -0.54470700 | 0.55036600  | -0.03364200 |
| C  | -3.53816100 | -4.59186200 | 1.30311100  |
| C  | -4.71217800 | -4.93458900 | 0.62137700  |
| C  | -5.39215100 | -4.01043200 | -0.18490000 |
| C  | -4.85264200 | -2.73610400 | -0.29818800 |
| C  | -3.64956900 | -2.38512600 | 0.35696400  |
| C  | -3.00338500 | -3.30663400 | 1.17691900  |
| N  | -5.36014400 | -1.64506900 | -1.01309000 |
| C  | -4.54074200 | -0.53767100 | -0.87675100 |
| C  | -3.37182600 | -0.98634200 | 0.02869300  |
| O  | -2.54086500 | -0.20757000 | 0.51486700  |
| O  | -4.74343000 | 0.57318400  | -1.33583000 |
| H  | -3.04439500 | -5.32469200 | 1.93258300  |
| H  | -5.11632400 | -5.93699300 | 0.72517700  |
| H  | -6.30957100 | -4.28460200 | -0.69381900 |
| H  | -2.10102800 | -3.03158400 | 1.71030500  |
| C  | -6.56999200 | -1.66311100 | -1.81056000 |
| H  | -7.43366800 | -1.93446000 | -1.19517000 |
| H  | -6.71198200 | -0.65918400 | -2.21193900 |
| H  | -6.47921500 | -2.37657300 | -2.63663800 |
| O  | 2.02036300  | 0.52343700  | 0.07847800  |
| C  | 7.86567800  | -0.97697300 | 2.64056300  |
| H  | 8.05928800  | -1.89074000 | 3.21108900  |
| H  | 8.54010300  | -0.98183300 | 1.77426600  |
| H  | 8.14264400  | -0.11817600 | 3.26101700  |
| C  | 0.35295900  | -5.16028200 | -2.32639500 |
| H  | -0.27207700 | -4.75331000 | -3.13216400 |
| H  | 1.17290100  | -5.71263500 | -2.79611800 |
| H  | -0.26362300 | -5.86751600 | -1.76245700 |
| O  | 3.81175300  | 0.32544700  | -1.58429900 |
| O  | 2.20110600  | 1.95619000  | -1.78510500 |
| C  | 3.20905500  | 2.25487200  | -2.79703900 |
| C  | 4.09151200  | 3.36748000  | -2.22651000 |
| C  | 2.50174400  | 2.72280100  | -4.06137100 |
| H  | 4.60790800  | 3.03737100  | -1.31949400 |
| H  | 4.84016200  | 3.69540400  | -2.95377700 |
| H  | 3.46071900  | 4.22357400  | -1.96952900 |
| H  | 1.75526400  | 1.99855500  | -4.39430000 |
| H  | 1.99503900  | 3.67351800  | -3.86878800 |
| H  | 3.22450200  | 2.87959000  | -4.86894600 |
| C  | 3.95956300  | 0.88039800  | -2.92897000 |
| C  | 3.26886100  | -0.09470000 | -3.88601000 |

|   |             |             |             |
|---|-------------|-------------|-------------|
| C | 5.44454800  | 0.98459200  | -3.24582400 |
| H | 2.20191800  | -0.18653200 | -3.66054300 |
| H | 3.38086100  | 0.22491900  | -4.92615400 |
| H | 3.72473100  | -1.08329600 | -3.77793500 |
| H | 5.97937000  | 1.55049000  | -2.48028200 |
| H | 5.88080100  | -0.01775300 | -3.29931900 |
| H | 5.59496900  | 1.47331500  | -4.21406800 |
| B | 2.68102000  | 0.89456900  | -1.05906700 |
| C | -2.37225400 | -1.74215200 | -2.40521600 |
| H | -1.86256300 | -2.62132800 | -2.02234500 |
| H | -3.34775200 | -1.89157700 | -2.85421400 |
| C | -1.75036200 | -0.53441100 | -2.44717300 |
| H | -2.32418700 | 0.30860200  | -2.83426200 |
| C | -0.43624800 | -0.23166400 | -1.92524700 |
| H | 0.23120200  | -1.09016100 | -1.86237100 |
| H | 0.04542200  | 0.61810100  | -2.41671400 |

**TS-A**

|   |             |             |             |
|---|-------------|-------------|-------------|
| N | -0.14597800 | 0.43417200  | -2.02937300 |
| C | -1.53188300 | -0.16103100 | -2.22870500 |
| H | -2.14942100 | 0.66125800  | -2.59442000 |
| C | -1.43038400 | -1.19852900 | -3.36247200 |
| H | -2.33369800 | -1.18800500 | -3.97599600 |
| H | -1.31356400 | -2.21212200 | -2.97263000 |
| C | -0.17499800 | -0.76255500 | -4.13054000 |
| H | -0.41288800 | 0.04812600  | -4.82828100 |
| H | 0.27713200  | -1.57535500 | -4.70549700 |
| C | 0.74416600  | -0.26556900 | -3.01489500 |
| H | 1.52455000  | 0.42280600  | -3.34162300 |
| H | 1.24209000  | -1.09404800 | -2.51241700 |
| C | -2.26471800 | -0.60271800 | -0.93399700 |
| C | -3.74575700 | -0.68385300 | -1.31511800 |
| C | -4.33076600 | -1.89449800 | -1.69831900 |
| C | -4.51382000 | 0.48336600  | -1.40869800 |
| C | -5.65500900 | -1.93893800 | -2.13568200 |
| H | -3.75357400 | -2.81152100 | -1.65525500 |
| C | -5.83762000 | 0.43369500  | -1.83706000 |
| H | -4.07616700 | 1.44142700  | -1.14759400 |
| C | -6.43608100 | -0.77978400 | -2.20311700 |
| H | -6.08661000 | -2.89306100 | -2.42728000 |
| H | -6.41506100 | 1.35315200  | -1.89125100 |
| C | -1.77429500 | -1.87661500 | -0.24364400 |
| C | -2.54667400 | -2.42320300 | 0.79445600  |
| C | -0.55490100 | -2.49618600 | -0.53445800 |



|    |             |             |             |
|----|-------------|-------------|-------------|
| C  | -2.10315000 | -3.52295600 | 1.52345400  |
| H  | -3.49610500 | -1.97034000 | 1.04503900  |
| C  | -0.12357400 | -3.61262900 | 0.18237500  |
| H  | 0.08852700  | -2.11204300 | -1.31134100 |
| C  | -0.87845000 | -4.13824200 | 1.23462800  |
| H  | -2.72197100 | -3.91112300 | 2.32855800  |
| H  | 0.82500000  | -4.07379500 | -0.07332100 |
| C  | 1.01217800  | 2.69135900  | -2.30611400 |
| C  | 1.60525200  | 3.23237600  | -3.44579800 |
| C  | 2.63363500  | 3.88099900  | -0.93991600 |
| C  | 2.71022200  | 4.08371400  | -3.35718400 |
| H  | 1.18035500  | 2.99714200  | -4.41960500 |
| C  | 3.20568600  | 4.41455500  | -2.09769600 |
| H  | 3.16279300  | 4.49757200  | -4.25229000 |
| H  | 4.04489300  | 5.09543600  | -2.00578600 |
| C  | 3.14284600  | 4.28381200  | 0.40712400  |
| O  | 1.00910400  | 2.44335500  | 0.06209500  |
| F  | 2.18837900  | 4.89306200  | 1.16012600  |
| F  | 3.59900600  | 3.24376100  | 1.14368500  |
| F  | 4.17358700  | 5.16712100  | 0.32035900  |
| C  | -0.25741000 | 1.89873000  | -2.39347600 |
| H  | -0.99794300 | 2.31041300  | -1.70269000 |
| H  | -0.66447000 | 1.97555200  | -3.40924800 |
| C  | 1.53965300  | 2.97751700  | -1.01681300 |
| Zn | 0.61293200  | 0.52034800  | 0.02635200  |
| C  | 3.75809300  | -4.67679300 | -1.37780700 |
| C  | 4.95800400  | -4.92971100 | -0.70189900 |
| C  | 5.54883900  | -3.97117500 | 0.13495000  |
| C  | 4.89119500  | -2.75748900 | 0.28642500  |
| C  | 3.65912200  | -2.50565500 | -0.35746100 |
| C  | 3.10337200  | -3.45191200 | -1.21292400 |
| N  | 5.29387000  | -1.63545800 | 1.02121000  |
| C  | 4.37952900  | -0.60088300 | 0.89403400  |
| C  | 3.25218900  | -1.14648900 | 0.00127200  |
| O  | 2.38337300  | -0.43885700 | -0.54813600 |
| O  | 4.48831100  | 0.51995200  | 1.36511400  |
| H  | 3.33838700  | -5.43171300 | -2.03456900 |
| H  | 5.45519200  | -5.88557500 | -0.83673200 |
| H  | 6.49053800  | -4.17202200 | 0.63398100  |
| H  | 2.18229700  | -3.23752400 | -1.74475300 |
| C  | 6.50491200  | -1.55013500 | 1.81199700  |
| H  | 7.38767200  | -1.71971500 | 1.18691200  |
| H  | 6.54907200  | -0.54627600 | 2.23564100  |
| H  | 6.49198800  | -2.28740400 | 2.62185000  |

|   |             |             |             |
|---|-------------|-------------|-------------|
| O | -2.01199300 | 0.52701800  | -0.05010300 |
| C | -7.88040000 | -0.83426700 | -2.63597400 |
| H | -8.07329800 | -1.70230200 | -3.27422100 |
| H | -8.54847400 | -0.91058100 | -1.76808600 |
| H | -8.16646100 | 0.06830500  | -3.18609700 |
| C | -0.37131000 | -5.30186800 | 2.04822200  |
| H | 0.25412500  | -4.94909400 | 2.87888900  |
| H | -1.19481600 | -5.87858100 | 2.48078200  |
| H | 0.24340600  | -5.97533200 | 1.44239000  |
| O | -3.76527800 | 0.22615500  | 1.63537600  |
| O | -2.18355100 | 1.88033500  | 1.87346000  |
| C | -3.17545200 | 2.11392400  | 2.91850400  |
| C | -4.08963300 | 3.23392600  | 2.41676400  |
| C | -2.45000800 | 2.53838300  | 4.18800300  |
| H | -4.61840200 | 2.93518000  | 1.50602100  |
| H | -4.82918300 | 3.51415700  | 3.17270200  |
| H | -3.48025100 | 4.11290000  | 2.18672000  |
| H | -1.68508500 | 1.81332200  | 4.47406000  |
| H | -1.96297600 | 3.50522400  | 4.02741700  |
| H | -3.15837800 | 2.64715100  | 5.01598200  |
| C | -3.89856800 | 0.72075100  | 3.00431600  |
| C | -3.17456200 | -0.28200000 | 3.90666800  |
| C | -5.37939100 | 0.78332200  | 3.35099800  |
| H | -2.11006000 | -0.34401000 | 3.66108000  |
| H | -3.27548700 | -0.01091500 | 4.96162700  |
| H | -3.61399000 | -1.27323400 | 3.76126200  |
| H | -5.93833300 | 1.37123100  | 2.62008800  |
| H | -5.79603800 | -0.22861400 | 3.36837800  |
| H | -5.52147400 | 1.22682600  | 4.34198000  |
| B | -2.65707200 | 0.83988900  | 1.11263100  |
| C | 2.28589500  | -1.89166900 | 2.24807200  |
| H | 1.74218400  | -2.72003200 | 1.80730600  |
| H | 3.23627400  | -2.11740500 | 2.71769500  |
| C | 1.68357800  | -0.67507000 | 2.42327600  |
| H | 2.28060800  | 0.10972400  | 2.88738400  |
| C | 0.39552700  | -0.29511900 | 1.92859100  |
| H | -0.31326800 | -1.10907500 | 1.79062100  |
| H | -0.04643100 | 0.57655100  | 2.41390200  |

**Int-III A**

|   |             |             |             |
|---|-------------|-------------|-------------|
| N | -0.10627200 | 0.29524500  | -2.05891900 |
| C | -1.46740500 | -0.37056000 | -2.21053200 |
| H | -2.10232800 | 0.39803000  | -2.65670800 |
| C | -1.31504000 | -1.47401500 | -3.27061400 |

|   |             |             |             |
|---|-------------|-------------|-------------|
| H | -2.24354400 | -1.59654300 | -3.83225800 |
| H | -1.07107600 | -2.44026600 | -2.82427900 |
| C | -0.15119600 | -0.96281300 | -4.12854000 |
| H | -0.49955000 | -0.19530900 | -4.82927200 |
| H | 0.33245600  | -1.75318500 | -4.70893600 |
| C | 0.78509300  | -0.36275000 | -3.08097200 |
| H | 1.48641900  | 0.37939600  | -3.46799600 |
| H | 1.36522200  | -1.13721100 | -2.57678000 |
| C | -2.22829900 | -0.73347300 | -0.90367800 |
| C | -3.69866000 | -0.83583200 | -1.33421600 |
| C | -4.27233300 | -2.06367100 | -1.67703700 |
| C | -4.46021000 | 0.32511300  | -1.51700000 |
| C | -5.58007600 | -2.12990700 | -2.15999800 |
| H | -3.69925500 | -2.97774900 | -1.56720000 |
| C | -5.76714800 | 0.25484300  | -1.99095500 |
| H | -4.03039700 | 1.29476900  | -1.28808600 |
| C | -6.35518300 | -0.97552400 | -2.31574900 |
| H | -6.00284800 | -3.09749500 | -2.41831300 |
| H | -6.33963400 | 1.17087700  | -2.11360600 |
| C | -1.78052500 | -1.97277300 | -0.12531500 |
| C | -2.61578600 | -2.44412300 | 0.90504700  |
| C | -0.56541300 | -2.63203900 | -0.32602900 |
| C | -2.24476600 | -3.51750300 | 1.70555100  |
| H | -3.56017600 | -1.95049500 | 1.08835200  |
| C | -0.21038500 | -3.72803300 | 0.46646000  |
| H | 0.14483100  | -2.29155300 | -1.06693000 |
| C | -1.03205800 | -4.18938400 | 1.49580100  |
| H | -2.91021300 | -3.84335700 | 2.50123300  |
| H | 0.73486400  | -4.22799800 | 0.28884500  |
| C | 0.87988600  | 2.65988200  | -2.27372200 |
| C | 1.38400100  | 3.32362000  | -3.39194600 |
| C | 2.32901900  | 4.01225800  | -0.86331900 |
| C | 2.36062300  | 4.31562800  | -3.27068100 |
| H | 0.98328700  | 3.07629700  | -4.37266400 |
| C | 2.80760900  | 4.67004200  | -1.99995000 |
| H | 2.74415600  | 4.82364000  | -4.14933500 |
| H | 3.53493300  | 5.46558900  | -1.88169100 |
| C | 2.77056600  | 4.44603600  | 0.49959800  |
| O | 0.96981300  | 2.28579000  | 0.08343000  |
| F | 1.72463500  | 4.83076900  | 1.27737700  |
| F | 3.42365900  | 3.48423700  | 1.19099000  |
| F | 3.61326800  | 5.51175000  | 0.44521800  |
| C | -0.31400500 | 1.75443100  | -2.39159900 |
| H | -1.08760800 | 2.09333600  | -1.69875600 |

|    |             |             |             |
|----|-------------|-------------|-------------|
| H  | -0.71773100 | 1.82259700  | -3.40954500 |
| C  | 1.38789800  | 2.95719400  | -0.97889100 |
| Zn | 0.96953600  | 0.37177500  | -0.20521200 |
| C  | 4.36961100  | -4.89020800 | -0.72322700 |
| C  | 5.72358600  | -4.70975000 | -0.43590000 |
| C  | 6.19778000  | -3.49667100 | 0.08653500  |
| C  | 5.26665700  | -2.49246200 | 0.32325900  |
| C  | 3.89665800  | -2.67146300 | 0.07936400  |
| C  | 3.44832200  | -3.86111200 | -0.46729200 |
| N  | 5.50372400  | -1.18058800 | 0.77003900  |
| C  | 4.34019000  | -0.44126900 | 0.77308700  |
| C  | 3.14901500  | -1.40790600 | 0.47477200  |
| O  | 2.28772700  | -0.95844100 | -0.50122500 |
| O  | 4.27259100  | 0.75747000  | 1.01147300  |
| H  | 4.02642900  | -5.82748300 | -1.15067800 |
| H  | 6.42868600  | -5.51215800 | -0.63261000 |
| H  | 7.25461700  | -3.34819000 | 0.28212400  |
| H  | 2.40217700  | -3.98583400 | -0.72188100 |
| C  | 6.81702700  | -0.62446200 | 1.02444300  |
| H  | 7.44561900  | -0.68797100 | 0.12905100  |
| H  | 6.68308800  | 0.42191000  | 1.30051700  |
| H  | 7.30960900  | -1.15946600 | 1.84295100  |
| O  | -2.00331800 | 0.43107800  | -0.06605200 |
| C  | -7.78263700 | -1.05016000 | -2.79877900 |
| H  | -7.96215200 | -1.96387600 | -3.37395600 |
| H  | -8.48436900 | -1.05045500 | -1.95442000 |
| H  | -8.03612900 | -0.19114300 | -3.42902900 |
| C  | -0.63842000 | -5.37145900 | 2.34502300  |
| H  | -0.79274500 | -5.16325300 | 3.40966500  |
| H  | -1.24334100 | -6.25326400 | 2.09858300  |
| H  | 0.41277000  | -5.63615300 | 2.19642300  |
| O  | -3.86980500 | 0.26636000  | 1.51383000  |
| O  | -2.20125800 | 1.81467400  | 1.83828100  |
| C  | -3.25052100 | 2.14390000  | 2.79640500  |
| C  | -4.04140300 | 3.31133200  | 2.20140400  |
| C  | -2.59684100 | 2.55205900  | 4.10983500  |
| H  | -4.51864800 | 3.02633100  | 1.25837100  |
| H  | -4.81495400 | 3.66219300  | 2.89089000  |
| H  | -3.35474900 | 4.13909900  | 2.00129000  |
| H  | -1.91148000 | 1.78356000  | 4.47376300  |
| H  | -2.02955900 | 3.47688400  | 3.96629200  |
| H  | -3.35741700 | 2.73440100  | 4.87627300  |
| C  | -4.07539000 | 0.80721100  | 2.85427800  |
| C  | -3.50185800 | -0.21543400 | 3.83863000  |

|   |             |             |            |
|---|-------------|-------------|------------|
| C | -5.57142300 | 0.98217800  | 3.07712000 |
| H | -2.42768300 | -0.35803900 | 3.68766100 |
| H | -3.66984300 | 0.09407800  | 4.87428000 |
| H | -3.99663600 | -1.17836300 | 3.68150000 |
| H | -6.02649200 | 1.58523400  | 2.28872900 |
| H | -6.05917200 | 0.00240300  | 3.08390200 |
| H | -5.76125600 | 1.46342000  | 4.04217200 |
| B | -2.69058000 | 0.79677000  | 1.05374000 |
| C | 2.41585600  | -1.63367200 | 1.85288000 |
| H | 1.72659900  | -2.47191000 | 1.72388500 |
| H | 3.15775600  | -1.91115400 | 2.61207300 |
| C | 1.66802100  | -0.40718700 | 2.27330400 |
| H | 2.26607800  | 0.46508100  | 2.52968900 |
| C | 0.32541000  | -0.31070600 | 2.28774200 |
| H | -0.30232900 | -1.16753500 | 2.05767700 |
| H | -0.17677900 | 0.60590300  | 2.58080100 |

**Int-IVA**

|   |             |             |             |
|---|-------------|-------------|-------------|
| C | -1.42433400 | -2.56840100 | -2.26678200 |
| C | -1.58403000 | -3.43764500 | -1.18618200 |
| C | -1.70886200 | -2.95695000 | 0.12661900  |
| C | -1.66635300 | -1.58133400 | 0.31019200  |
| C | -1.51106700 | -0.69903100 | -0.76717700 |
| C | -1.38990300 | -1.18008500 | -2.05864400 |
| N | -1.72813700 | -0.86058100 | 1.51538000  |
| C | -1.52020000 | 0.48269800  | 1.30415300  |
| C | -1.48633300 | 0.71597200  | -0.23721000 |
| O | -0.32509700 | 1.44623400  | -0.63653400 |
| O | -1.40494000 | 1.33596000  | 2.17102600  |
| H | -1.32484800 | -2.96658400 | -3.27160400 |
| H | -1.61015000 | -4.50954700 | -1.35857800 |
| H | -1.82402300 | -3.63900100 | 0.96217900  |
| H | -1.25508500 | -0.49668400 | -2.89222400 |
| C | -1.72777800 | -1.47043300 | 2.82976900  |
| H | -0.82553900 | -2.07671500 | 2.96998200  |
| H | -1.74376800 | -0.66803500 | 3.56748800  |
| H | -2.61006200 | -2.10438000 | 2.95768300  |
| O | 2.03950400  | 1.38374700  | -0.96392600 |
| O | 1.12283300  | -0.06202800 | 0.57933300  |
| C | 2.48411400  | -0.53197400 | 0.35000200  |
| C | 2.37724900  | -1.71036500 | -0.62176400 |
| C | 3.07152800  | -0.98407200 | 1.67944300  |
| H | 1.95896800  | -1.39560800 | -1.58264600 |
| H | 3.35267000  | -2.17291500 | -0.79868400 |

|   |             |             |             |
|---|-------------|-------------|-------------|
| H | 1.70680700  | -2.46109600 | -0.19316700 |
| H | 3.00949100  | -0.19737300 | 2.43414300  |
| H | 2.51975600  | -1.85537900 | 2.04618600  |
| H | 4.12076000  | -1.27253100 | 1.55771600  |
| C | 3.16238400  | 0.73941000  | -0.28214800 |
| C | 3.67208500  | 1.72997900  | 0.76631300  |
| C | 4.24416200  | 0.43955800  | -1.31062000 |
| H | 2.90287000  | 1.94453400  | 1.51460700  |
| H | 4.55957600  | 1.34664300  | 1.27851300  |
| H | 3.93841300  | 2.66766000  | 0.26969200  |
| H | 3.85196700  | -0.14317600 | -2.14679200 |
| H | 4.64958100  | 1.37658600  | -1.70480700 |
| H | 5.06562900  | -0.11861200 | -0.84934400 |
| B | 0.90593300  | 0.93661900  | -0.33771800 |
| C | -2.71734800 | 1.52523500  | -0.69603600 |
| H | -2.71341100 | 1.53121400  | -1.79202500 |
| H | -3.60979400 | 0.96908500  | -0.37902600 |
| C | -2.75983900 | 2.93235300  | -0.16930500 |
| H | -2.76650800 | 3.03906100  | 0.91283900  |
| C | -2.78864900 | 4.01461700  | -0.94697800 |
| H | -2.77089900 | 3.93822000  | -2.03255200 |
| H | -2.83447600 | 5.01710700  | -0.52969800 |

**(S)-3aa**

|   |             |             |             |
|---|-------------|-------------|-------------|
| C | -2.60847500 | -2.12628500 | -0.00487500 |
| C | -3.40139000 | -0.99795100 | -0.22263100 |
| C | -2.84509100 | 0.28948300  | -0.25776600 |
| C | -1.47368400 | 0.39830500  | -0.06740600 |
| C | -0.66457100 | -0.72740600 | 0.14429000  |
| C | -1.22288900 | -1.99335700 | 0.17820400  |
| N | -0.68879000 | 1.56640800  | -0.03901900 |
| C | 0.63070700  | 1.27036500  | 0.21212300  |
| C | 0.76852300  | -0.27783700 | 0.27105400  |
| O | 1.53341300  | 2.08240000  | 0.36368600  |
| H | -3.06476800 | -3.11081300 | 0.02305300  |
| H | -4.47174400 | -1.11298900 | -0.36605700 |
| H | -3.46709300 | 1.16273200  | -0.42264000 |
| H | -0.59979200 | -2.86633000 | 0.34978100  |
| C | -1.21126400 | 2.91337900  | -0.15301500 |
| H | -1.94183300 | 3.11153100  | 0.63849200  |
| H | -0.37150100 | 3.60177800  | -0.05419900 |
| H | -1.69114800 | 3.05825300  | -1.12621800 |
| C | 1.64173900  | -0.78815100 | -0.90981100 |
| H | 1.58065900  | -1.88200900 | -0.89468700 |

|   |            |             |             |
|---|------------|-------------|-------------|
| H | 1.19828700 | -0.44136300 | -1.85033000 |
| C | 3.07289900 | -0.34358900 | -0.78761100 |
| H | 3.29243200 | 0.68121300  | -1.07669300 |
| C | 4.04255300 | -1.11253800 | -0.28293300 |
| H | 3.85331000 | -2.14003900 | 0.02182100  |
| H | 5.06179400 | -0.75150500 | -0.17610200 |
| O | 1.31646200 | -0.68502400 | 1.51404000  |
| H | 2.26959000 | -0.48083600 | 1.46737200  |

**Int-I** (in *i*-PrOH)

|   |             |             |             |
|---|-------------|-------------|-------------|
| N | 0.40758000  | -0.50632000 | 1.03153400  |
| C | -1.07393300 | -0.79869900 | 0.99385400  |
| H | -1.16128800 | -1.86141900 | 0.75655300  |
| C | -1.60380300 | -0.55163500 | 2.42533000  |
| H | -2.31017600 | -1.32901300 | 2.72418900  |
| H | -2.12624500 | 0.40647000  | 2.48226900  |
| C | -0.34514800 | -0.52266900 | 3.30589300  |
| H | -0.05617000 | -1.53756900 | 3.60180800  |
| H | -0.47535200 | 0.06602000  | 4.21850800  |
| C | 0.71075900  | 0.07378400  | 2.37217800  |
| H | 1.73857100  | -0.16392900 | 2.64817200  |
| H | 0.63049200  | 1.16222500  | 2.33069200  |
| C | -1.84423600 | -0.07653600 | -0.19595600 |
| C | -3.04763600 | -0.99775500 | -0.45642300 |
| C | -4.14563100 | -1.03029300 | 0.41604300  |
| C | -3.03151900 | -1.89105800 | -1.52836400 |
| C | -5.18987300 | -1.93013900 | 0.21845600  |
| H | -4.19296000 | -0.33655600 | 1.24957300  |
| C | -4.08232800 | -2.79073600 | -1.72645100 |
| H | -2.18615500 | -1.87368200 | -2.20626600 |
| C | -5.17867100 | -2.82870800 | -0.85899900 |
| H | -6.03011700 | -1.93372400 | 0.90922900  |
| H | -4.04733000 | -3.47526300 | -2.57104200 |
| C | -2.31442600 | 1.36974900  | 0.05750700  |
| C | -3.44872300 | 1.85602300  | -0.60990900 |
| C | -1.56653800 | 2.29813100  | 0.79353100  |
| C | -3.82716100 | 3.19489400  | -0.52459300 |
| H | -4.04389000 | 1.17844500  | -1.21196200 |
| C | -1.94363800 | 3.63833000  | 0.88191200  |
| H | -0.66334500 | 1.98855500  | 1.30161100  |
| C | -3.08768700 | 4.11322600  | 0.23097700  |
| H | -4.71250600 | 3.53259900  | -1.05854600 |
| H | -1.33585300 | 4.32371800  | 1.46801100  |
| C | 2.70038200  | -1.49280200 | 0.78372600  |

|    |             |             |             |
|----|-------------|-------------|-------------|
| C  | 3.52299800  | -2.14686800 | 1.70447000  |
| C  | 4.68767400  | -0.41675200 | -0.12072500 |
| C  | 4.90630800  | -1.96467800 | 1.72475600  |
| H  | 3.06093300  | -2.81905300 | 2.42367600  |
| C  | 5.48291300  | -1.09200200 | 0.80617600  |
| H  | 5.52118300  | -2.48881600 | 2.44868600  |
| H  | 6.55410600  | -0.92518800 | 0.80659600  |
| C  | 5.31221500  | 0.53082900  | -1.09851300 |
| O  | 2.59010700  | 0.04708800  | -1.09266400 |
| F  | 5.11938700  | 0.16064100  | -2.38888100 |
| F  | 4.82786800  | 1.79436000  | -0.98507100 |
| F  | 6.65558400  | 0.62468600  | -0.92800100 |
| C  | 1.21333400  | -1.75476700 | 0.81386500  |
| H  | 0.87230200  | -2.19782500 | -0.13000900 |
| H  | 0.98779400  | -2.48788100 | 1.59941900  |
| C  | 3.28224700  | -0.60357800 | -0.16283900 |
| Zn | 0.74870900  | 0.32246100  | -0.92433600 |
| O  | -1.02179400 | -0.04028000 | -1.34393500 |
| C  | -6.32225800 | -3.79031500 | -1.07548900 |
| H  | -6.55724600 | -4.34458700 | -0.15918800 |
| H  | -7.23683200 | -3.26135400 | -1.37267700 |
| H  | -6.08867400 | -4.51631600 | -1.86038500 |
| C  | -3.51872600 | 5.55411600  | 0.35394700  |
| H  | -2.66049400 | 6.21604400  | 0.50984000  |
| H  | -4.05212300 | 5.88878300  | -0.54190900 |
| H  | -4.19640200 | 5.69354200  | 1.20669600  |

**1a** (in *i*-PrOH)

|   |             |             |             |
|---|-------------|-------------|-------------|
| C | 2.91503900  | 0.51236900  | 0.00007400  |
| C | 2.73940200  | -0.87676100 | 0.00010100  |
| C | 1.46637900  | -1.46711000 | 0.00003200  |
| C | 0.37036000  | -0.61727400 | -0.00015100 |
| C | 0.53380800  | 0.78375800  | -0.00013000 |
| C | 1.80220300  | 1.35686100  | 0.00000900  |
| N | -0.99442900 | -0.96342700 | -0.00024900 |
| C | -1.78683900 | 0.16052900  | 0.00007300  |
| O | -3.00383600 | 0.20773300  | 0.00023100  |
| H | 3.91634100  | 0.92956700  | 0.00014100  |
| H | 3.61250400  | -1.52229700 | 0.00021100  |
| H | 1.35266000  | -2.54522200 | 0.00013400  |
| H | 1.91095700  | 2.43697300  | -0.00000700 |
| C | -1.50175200 | -2.32257500 | -0.00000700 |
| H | -1.16575000 | -2.85785000 | 0.89364400  |
| H | -2.59060000 | -2.26633000 | -0.00261300 |



|   |             |             |             |
|---|-------------|-------------|-------------|
| H | -1.16151500 | -2.85950300 | -0.89103100 |
| C | -0.80270500 | 1.37835500  | -0.00006900 |
| O | -1.16228300 | 2.53973500  | -0.00002300 |

**2b**

|   |             |             |             |
|---|-------------|-------------|-------------|
| C | 4.35170600  | 0.51176400  | 0.17225000  |
| C | 2.30042300  | -1.06722800 | -0.22682400 |
| B | 0.84113200  | -0.55372900 | -0.11815000 |
| C | -1.43151900 | -0.61967100 | 0.03048400  |
| C | -0.93193400 | 0.87022100  | 0.00090200  |
| O | 0.49961100  | 0.72355600  | 0.25075900  |
| C | -1.52400100 | 1.76793900  | 1.08000500  |
| C | -1.07152700 | 1.52729900  | -1.37482900 |
| C | -2.56392900 | -0.93776900 | -0.93770300 |
| C | -1.77812900 | -1.11349800 | 1.43750100  |
| H | 4.80287600  | 1.07314100  | -0.64344500 |
| H | 4.78246500  | 0.64318800  | 1.16281900  |
| H | 2.47964600  | -2.11495200 | -0.47566500 |
| H | -1.10539100 | 2.77526000  | 0.99113500  |
| H | -2.61056600 | 1.84052200  | 0.96468700  |
| H | -1.30322700 | 1.39296500  | 2.08152300  |
| H | -2.11943300 | 1.73002000  | -1.61530100 |
| H | -0.52829900 | 2.47694100  | -1.37172700 |
| H | -0.64935100 | 0.89462600  | -2.16166400 |
| H | -2.82952500 | -1.99655100 | -0.85842000 |
| H | -3.45289300 | -0.34590100 | -0.69549900 |
| H | -2.27928500 | -0.73309700 | -1.97185600 |
| H | -2.70084100 | -0.65438400 | 1.80469000  |
| H | -1.92029600 | -2.19790100 | 1.40882300  |
| H | -0.97313300 | -0.89271600 | 2.14515500  |
| C | 3.33630700  | -0.28407600 | -0.02874200 |
| O | -0.23995900 | -1.35510700 | -0.38735500 |

**Int-IIB**

|   |             |             |            |
|---|-------------|-------------|------------|
| N | 0.12121400  | 0.74089800  | 1.91307800 |
| C | 1.49262100  | 0.13588500  | 2.18464100 |
| H | 2.12626900  | 0.97955800  | 2.46185500 |
| C | 1.36168400  | -0.77315000 | 3.42299300 |
| H | 2.24387300  | -0.68104500 | 4.05993400 |
| H | 1.27445400  | -1.82495700 | 3.14333400 |
| C | 0.07724800  | -0.27854700 | 4.10392000 |
| H | 0.28714900  | 0.58808400  | 4.74048100 |
| H | -0.39588900 | -1.04229100 | 4.72726300 |
| C | -0.80227600 | 0.12406900  | 2.92070200 |

|    |             |             |             |
|----|-------------|-------------|-------------|
| H  | -1.59332400 | 0.83327300  | 3.16464800  |
| H  | -1.28169900 | -0.74144500 | 2.46692800  |
| C  | 2.22726100  | -0.45494800 | 0.95257100  |
| C  | 3.69343800  | -0.58296700 | 1.37807100  |
| C  | 4.21984300  | -1.80173300 | 1.81501200  |
| C  | 4.50656000  | 0.55555100  | 1.44963900  |
| C  | 5.53044300  | -1.88303300 | 2.28795900  |
| H  | 3.60748600  | -2.69604200 | 1.78583400  |
| C  | 5.81587900  | 0.46885800  | 1.91348300  |
| H  | 4.11623100  | 1.51852500  | 1.13641300  |
| C  | 6.35522200  | -0.75409200 | 2.33718100  |
| H  | 5.91653000  | -2.84284200 | 2.62170900  |
| H  | 6.42955600  | 1.36552400  | 1.94925700  |
| C  | 1.69254700  | -1.75572500 | 0.34840800  |
| C  | 2.41700300  | -2.35077400 | -0.69856800 |
| C  | 0.50550600  | -2.37633800 | 0.74161300  |
| C  | 1.95257400  | -3.49439500 | -1.33783000 |
| H  | 3.35154000  | -1.90777800 | -1.01674800 |
| C  | 0.05084700  | -3.53624700 | 0.11352800  |
| H  | -0.09905700 | -1.95963100 | 1.53199900  |
| C  | 0.75507600  | -4.10912600 | -0.94652600 |
| H  | 2.53332800  | -3.92082000 | -2.15234300 |
| H  | -0.87811800 | -3.98868100 | 0.44635400  |
| C  | -1.03355900 | 2.99967200  | 2.09067000  |
| C  | -1.56391800 | 3.62921600  | 3.21643900  |
| C  | -2.83492900 | 3.94607900  | 0.76218200  |
| C  | -2.71615100 | 4.41579500  | 3.13819200  |
| H  | -1.05643000 | 3.50828400  | 4.17134200  |
| C  | -3.34191700 | 4.57185900  | 1.90299700  |
| H  | -3.11503000 | 4.90158500  | 4.02259000  |
| H  | -4.23494000 | 5.18153000  | 1.81836900  |
| C  | -3.51554100 | 4.11138900  | -0.55829600 |
| O  | -1.19204100 | 2.54589700  | -0.24614500 |
| F  | -2.70938700 | 4.66217700  | -1.50189200 |
| F  | -3.95566900 | 2.93652000  | -1.07210100 |
| F  | -4.60551200 | 4.92039700  | -0.47463200 |
| C  | 0.24929500  | 2.22854000  | 2.17344600  |
| H  | 0.96532200  | 2.59088000  | 1.43008900  |
| H  | 0.69492500  | 2.37408600  | 3.16471400  |
| C  | -1.67062800 | 3.13473700  | 0.82741000  |
| Zn | -0.56677400 | 0.69320500  | -0.14828000 |
| C  | -3.53579700 | -4.42679000 | 1.92889100  |
| C  | -4.54611400 | -4.98060400 | 1.13132200  |
| C  | -5.12835900 | -4.27098800 | 0.07113700  |

|   |             |             |             |
|---|-------------|-------------|-------------|
| C | -4.65955400 | -2.98761900 | -0.17465800 |
| C | -3.62283300 | -2.42676100 | 0.60517400  |
| C | -3.07040700 | -3.13602000 | 1.66949200  |
| N | -5.08800100 | -2.08543000 | -1.15737600 |
| C | -4.36270900 | -0.91142600 | -1.09992900 |
| C | -3.36740900 | -1.09015500 | 0.08260600  |
| O | -2.62541000 | -0.20361200 | 0.49458600  |
| O | -4.50285000 | 0.07086900  | -1.80445800 |
| H | -3.11705300 | -5.00196200 | 2.74760400  |
| H | -4.89734800 | -5.98627500 | 1.34139900  |
| H | -5.91671500 | -4.71292400 | -0.52757100 |
| H | -2.29234600 | -2.69215600 | 2.28100200  |
| C | -6.09997900 | -2.36528400 | -2.15719900 |
| H | -7.05673800 | -2.60126800 | -1.68133100 |
| H | -6.21057400 | -1.47031300 | -2.77016300 |
| H | -5.79448600 | -3.20536700 | -2.78998000 |
| O | 2.05422700  | 0.61173900  | -0.02198200 |
| C | 7.78489600  | -0.84889600 | 2.81004000  |
| H | 7.93941900  | -1.73080400 | 3.43948400  |
| H | 8.47601100  | -0.92601100 | 1.96051100  |
| H | 8.07556300  | 0.03818500  | 3.38288400  |
| C | 0.23469100  | -5.32894800 | -1.66414100 |
| H | -0.21826200 | -5.04969700 | -2.62426300 |
| H | 1.03783700  | -6.04168200 | -1.88111600 |
| H | -0.53160700 | -5.84212700 | -1.07483000 |
| O | 3.90423700  | 0.22760500  | -1.58565000 |
| O | 2.23056700  | 1.72571700  | -2.08712100 |
| C | 3.26075000  | 1.91859000  | -3.10233600 |
| C | 4.05761700  | 3.15870100  | -2.69152600 |
| C | 2.57954200  | 2.13664500  | -4.44651000 |
| H | 4.55136900  | 3.00984100  | -1.72591800 |
| H | 4.81818200  | 3.40957500  | -3.43683400 |
| H | 3.37175000  | 4.00587900  | -2.59857100 |
| H | 1.88507500  | 1.32670000  | -4.67956400 |
| H | 2.01667300  | 3.07495800  | -4.42559800 |
| H | 3.32347100  | 2.20322500  | -5.24724500 |
| C | 4.09125500  | 0.58689300  | -2.98984800 |
| C | 3.51389200  | -0.56072800 | -3.82249700 |
| C | 5.58412900  | 0.73514700  | -3.25073800 |
| H | 2.44613200  | -0.70108500 | -3.62872000 |
| H | 3.65334900  | -0.38288700 | -4.89269500 |
| H | 4.02963700  | -1.48855100 | -3.55754100 |
| H | 6.04419800  | 1.44315800  | -2.55847400 |
| H | 6.07620900  | -0.23452400 | -3.12673500 |

|   |             |             |             |
|---|-------------|-------------|-------------|
| H | 5.76232200  | 1.07853400  | -4.27507700 |
| B | 2.73286300  | 0.81864100  | -1.18700600 |
| C | -2.08598600 | -2.30407400 | -2.40079200 |
| H | -1.95122700 | -3.31446100 | -2.02370700 |
| C | -1.21326600 | -1.34726300 | -2.13162300 |
| C | -0.39872000 | -0.40399400 | -1.78983400 |
| H | 0.47383600  | -0.18969900 | -2.40624400 |
| H | -2.93377300 | -2.13127700 | -3.05864800 |

**Int-III B**

|   |             |             |             |
|---|-------------|-------------|-------------|
| N | 0.19073600  | 0.24311100  | 2.03631700  |
| C | 1.56473000  | -0.38274600 | 2.23073000  |
| H | 2.17718100  | 0.39695800  | 2.68800700  |
| C | 1.41035000  | -1.51464500 | 3.26174000  |
| H | 2.30090000  | -1.59168700 | 3.88897000  |
| H | 1.26664300  | -2.48255800 | 2.77524300  |
| C | 0.15281900  | -1.10874500 | 4.04106300  |
| H | 0.39592100  | -0.35677500 | 4.80016500  |
| H | -0.32798900 | -1.95083900 | 4.54639400  |
| C | -0.73257700 | -0.51119600 | 2.94831400  |
| H | -1.51005600 | 0.16356100  | 3.30748300  |
| H | -1.23179800 | -1.29279600 | 2.37794700  |
| C | 2.33218800  | -0.72661100 | 0.92519700  |
| C | 3.80362300  | -0.82715500 | 1.33029700  |
| C | 4.37531900  | -2.05562800 | 1.67625800  |
| C | 4.57322600  | 0.33149000  | 1.48797200  |
| C | 5.68905700  | -2.12411400 | 2.14054500  |
| H | 3.79523000  | -2.96713200 | 1.58159900  |
| C | 5.88710900  | 0.25804800  | 1.94355900  |
| H | 4.14454700  | 1.30076100  | 1.25588000  |
| C | 6.47260100  | -0.97180500 | 2.27294800  |
| H | 6.11079100  | -3.09129000 | 2.40213300  |
| H | 6.46663900  | 1.17182700  | 2.04820200  |
| C | 1.85245700  | -1.94136500 | 0.12953500  |
| C | 2.66358200  | -2.45534500 | -0.89233900 |
| C | 0.57547100  | -2.49599200 | 0.28132100  |
| C | 2.19915100  | -3.45442100 | -1.74675300 |
| H | 3.65499800  | -2.05001600 | -1.04129300 |
| C | 0.11618200  | -3.49868800 | -0.56773400 |
| H | -0.09317900 | -2.13385100 | 1.04727100  |
| C | 0.91274000  | -3.98659800 | -1.60911900 |
| H | 2.84732500  | -3.81756800 | -2.54026000 |
| H | -0.88847100 | -3.88674500 | -0.43578500 |
| C | -0.96199900 | 2.48371500  | 2.40137300  |

|   |             |            |             |
|---|-------------|------------|-------------|
| C | -1.62985400 | 2.94449600 | 3.53458300  |
| C | -2.51718200 | 3.73996800 | 1.01614600  |
| C | -2.73900700 | 3.78967400 | 3.43174300  |
| H | -1.26401500 | 2.64944700 | 4.51610600  |
| C | -3.16624000 | 4.19209100 | 2.16772000  |
| H | -3.25000700 | 4.14125800 | 4.32204000  |
| H | -4.01178600 | 4.86415700 | 2.06812200  |
| C | -2.95193100 | 4.20922700 | -0.33534900 |
| O | -0.80398700 | 2.40246700 | 0.02890300  |
| F | -1.97309800 | 4.89519700 | -0.98421500 |
| F | -3.31920500 | 3.20223400 | -1.16288400 |
| F | -4.01835900 | 5.05047700 | -0.26555200 |
| C | 0.29846100  | 1.67812100 | 2.50568300  |
| H | 1.07705900  | 2.12743300 | 1.88421400  |
| H | 0.65156600  | 1.67921800 | 3.54435600  |

**TS-B**

|   |             |             |             |
|---|-------------|-------------|-------------|
| N | 0.11048200  | 0.27450900  | 2.03191600  |
| C | 1.48444600  | -0.34989100 | 2.22496900  |
| H | 2.09299100  | 0.42687900  | 2.69256100  |
| C | 1.32853400  | -1.48932400 | 3.24672300  |
| H | 2.22209100  | -1.57729300 | 3.86822600  |
| H | 1.17488800  | -2.45239300 | 2.75365800  |
| C | 0.07821500  | -1.07960500 | 4.03532000  |
| H | 0.33024900  | -0.32987100 | 4.79384500  |
| H | -0.40274600 | -1.92049300 | 4.54241700  |
| C | -0.81160600 | -0.47679700 | 2.94925400  |
| H | -1.58240700 | 0.20257500  | 3.31473300  |
| H | -1.31846800 | -1.25398300 | 2.37883000  |
| C | 2.25812400  | -0.68054100 | 0.91967800  |
| C | 3.72899100  | -0.76699400 | 1.33053300  |
| C | 4.31101200  | -1.99024300 | 1.67704000  |
| C | 4.48576100  | 0.39918700  | 1.49573100  |
| C | 5.62295200  | -2.04652400 | 2.14847700  |
| H | 3.74080000  | -2.90746700 | 1.57778300  |
| C | 5.79757400  | 0.33800100  | 1.95838000  |
| H | 4.04856300  | 1.36479800  | 1.26413600  |
| C | 6.39383400  | -0.88683500 | 2.28802100  |
| H | 6.05291000  | -3.00997200 | 2.41025900  |
| H | 6.36706800  | 1.25740200  | 2.06865200  |
| C | 1.79433900  | -1.89717800 | 0.11777700  |
| C | 2.61962300  | -2.40282400 | -0.89733200 |
| C | 0.51762300  | -2.45735300 | 0.25250100  |
| C | 2.17096100  | -3.40206800 | -1.75967500 |

|    |             |             |             |
|----|-------------|-------------|-------------|
| H  | 3.60998900  | -1.99077700 | -1.03424800 |
| C  | 0.07399800  | -3.45965900 | -0.60618500 |
| H  | -0.16248800 | -2.10016800 | 1.01153800  |
| C  | 0.88632900  | -3.94257000 | -1.63770500 |
| H  | 2.83039000  | -3.75941500 | -2.54642800 |
| H  | -0.92992400 | -3.85352300 | -0.48800800 |
| C  | -1.03464800 | 2.52640300  | 2.37164800  |
| C  | -1.69694700 | 3.00283100  | 3.50196800  |
| C  | -2.57216600 | 3.79567300  | 0.97907900  |
| C  | -2.79473600 | 3.86152100  | 3.39424500  |
| H  | -1.33410100 | 2.70985000  | 4.48512400  |
| C  | -3.21494800 | 4.26353400  | 2.12798000  |
| H  | -3.30139700 | 4.22472500  | 4.28232900  |
| H  | -4.05026800 | 4.94748700  | 2.02408900  |
| C  | -2.99887200 | 4.26906600  | -0.37377400 |
| O  | -0.88127100 | 2.42407500  | -0.00333600 |
| F  | -2.01086000 | 4.94489900  | -1.01946600 |
| F  | -3.37427300 | 3.26653800  | -1.20201200 |
| F  | -4.05618900 | 5.12163600  | -0.30645000 |
| C  | 0.22083900  | 1.71352800  | 2.48721500  |
| H  | 1.00317500  | 2.15341400  | 1.86389100  |
| H  | 0.57026400  | 1.72298000  | 3.52705700  |
| C  | -1.48065400 | 2.89271600  | 1.07189700  |
| Zn | -0.58490700 | 0.49231800  | -0.02125800 |
| C  | -3.72770400 | -4.66608600 | 1.18808500  |
| C  | -4.98172700 | -4.87699100 | 0.60443100  |
| C  | -5.62026400 | -3.87872700 | -0.14621200 |
| C  | -4.95678200 | -2.66859400 | -0.30318300 |
| C  | -3.67585100 | -2.45545000 | 0.25134100  |
| C  | -3.06785200 | -3.44370400 | 1.01703900  |
| N  | -5.39989600 | -1.51683900 | -0.96797400 |
| C  | -4.47953900 | -0.48668100 | -0.85375800 |
| C  | -3.27677200 | -1.08077200 | -0.09402400 |
| O  | -2.40630200 | -0.37788000 | 0.46705700  |
| O  | -4.62717200 | 0.66133500  | -1.23771600 |
| H  | -3.26656500 | -5.45176900 | 1.77760200  |
| H  | -5.48209800 | -5.83073100 | 0.74252700  |
| H  | -6.60133700 | -4.04701500 | -0.57675900 |
| H  | -2.10014400 | -3.27001500 | 1.47497000  |
| C  | -6.68104400 | -1.38452100 | -1.63237300 |
| H  | -7.50180600 | -1.56211500 | -0.92957600 |
| H  | -6.74715100 | -0.36592800 | -2.01604500 |
| H  | -6.76112600 | -2.09347200 | -2.46303900 |
| O  | 2.00357500  | 0.50460700  | 0.10916500  |

|   |             |             |             |
|---|-------------|-------------|-------------|
| C | 7.82588800  | -0.95188900 | 2.75856700  |
| H | 8.00641100  | -1.84461700 | 3.36560200  |
| H | 8.51832900  | -0.98874700 | 1.90736900  |
| H | 8.09083400  | -0.07144600 | 3.35330500  |
| C | 0.37203100  | -4.99083800 | -2.59126900 |
| H | -0.48638700 | -4.60931100 | -3.15806700 |
| H | 1.14192600  | -5.29438500 | -3.30660900 |
| H | 0.03141200  | -5.88481900 | -2.05583400 |
| O | 3.78923300  | 0.31738400  | -1.55744600 |
| O | 2.13175000  | 1.89618600  | -1.79062500 |
| C | 3.12792900  | 2.20386400  | -2.81197000 |
| C | 3.96793300  | 3.36371600  | -2.27286800 |
| C | 2.40163400  | 2.61135200  | -4.08663700 |
| H | 4.49437700  | 3.07917800  | -1.35622800 |
| H | 4.70539700  | 3.69786100  | -3.00865000 |
| H | 3.30569900  | 4.20297000  | -2.04087300 |
| H | 1.67970300  | 1.85267000  | -4.39621300 |
| H | 1.86248400  | 3.54876100  | -3.91868300 |
| H | 3.11584500  | 2.77023200  | -4.90132500 |
| C | 3.93005800  | 0.85445400  | -2.90997900 |
| C | 3.28917900  | -0.16214400 | -3.85791900 |
| C | 5.41419700  | 1.00732200  | -3.21248200 |
| H | 2.22239100  | -0.28593200 | -3.64965800 |
| H | 3.40735700  | 0.14160300  | -4.90212200 |
| H | 3.77556400  | -1.13240000 | -3.72233100 |
| H | 5.91938200  | 1.60520700  | -2.45116300 |
| H | 5.88648600  | 0.02045500  | -3.24287100 |
| H | 5.55907500  | 1.48404100  | -4.18748800 |
| B | 2.64742100  | 0.86970600  | -1.04152400 |
| C | -2.56528100 | -1.64287500 | -2.23218400 |
| H | -3.27949500 | -2.29138600 | -2.69514500 |
| C | -1.50252200 | -1.00646300 | -2.25112200 |
| C | -0.37795100 | -0.23800400 | -1.98398300 |
| H | 0.55333600  | -0.80121400 | -1.93879100 |
| H | -0.28691300 | 0.69631500  | -2.54162700 |

**Int-IVB**

|   |            |             |            |
|---|------------|-------------|------------|
| N | 0.11051000 | 0.27444200  | 2.03194500 |
| C | 1.48447800 | -0.34994600 | 2.22498300 |
| H | 2.09300500 | 0.42682100  | 2.69260300 |
| C | 1.32857700 | -1.48940700 | 3.24670600 |
| H | 2.22213900 | -1.57739300 | 3.86819900 |
| H | 1.17492500 | -2.45246300 | 2.75361700 |
| C | 0.07826600 | -1.07970700 | 4.03532500 |

|    |             |             |             |
|----|-------------|-------------|-------------|
| H  | 0.33030700  | -0.32998800 | 4.79386200  |
| H  | -0.40268900 | -1.92060600 | 4.54241000  |
| C  | -0.81156800 | -0.47687700 | 2.94928100  |
| H  | -1.58236400 | 0.20249000  | 3.31478000  |
| H  | -1.31844000 | -1.25405100 | 2.37884900  |
| C  | 2.25818100  | -0.68053400 | 0.91969200  |
| C  | 3.72905400  | -0.76682600 | 1.33055800  |
| C  | 4.31117300  | -1.98998500 | 1.67722100  |
| C  | 4.48572000  | 0.39943700  | 1.49564000  |
| C  | 5.62310500  | -2.04609600 | 2.14870000  |
| H  | 3.74104000  | -2.90727000 | 1.57806600  |
| C  | 5.79752600  | 0.33842000  | 1.95832900  |
| H  | 4.04844200  | 1.36498400  | 1.26392900  |
| C  | 6.39388300  | -0.88632500 | 2.28813000  |
| H  | 6.05313800  | -3.00947700 | 2.41061100  |
| H  | 6.36693600  | 1.25788400  | 2.06851200  |
| C  | 1.79450800  | -1.89722900 | 0.11781500  |
| C  | 2.61989500  | -2.40290800 | -0.89719300 |
| C  | 0.51779600  | -2.45743000 | 0.25245900  |
| C  | 2.17134600  | -3.40223200 | -1.75950200 |
| H  | 3.61026100  | -1.99084000 | -1.03404800 |
| C  | 0.07427900  | -3.45981000 | -0.60619700 |
| H  | -0.16239500 | -2.10021200 | 1.01140900  |
| C  | 0.88672300  | -3.94277300 | -1.63760500 |
| H  | 2.83085800  | -3.75961600 | -2.54616800 |
| H  | -0.92964000 | -3.85370000 | -0.48807900 |
| C  | -1.03457900 | 2.52634200  | 2.37177500  |
| C  | -1.69680300 | 3.00278300  | 3.50213300  |
| C  | -2.57216600 | 3.79561200  | 0.97929600  |
| C  | -2.79458600 | 3.86148900  | 3.39447400  |
| H  | -1.33390000 | 2.70980400  | 4.48526900  |
| C  | -3.21487300 | 4.26349100  | 2.12823100  |
| H  | -3.30118900 | 4.22470500  | 4.28258600  |
| H  | -4.05020200 | 4.94743800  | 2.02438300  |
| C  | -2.99900200 | 4.26894100  | -0.37353300 |
| O  | -0.88129800 | 2.42403800  | -0.00321700 |
| F  | -2.01104800 | 4.94471800  | -1.01937500 |
| F  | -3.37450900 | 3.26635700  | -1.20165100 |
| F  | -4.05630000 | 5.12152900  | -0.30615000 |
| C  | 0.22089700  | 1.71345000  | 2.48727200  |
| H  | 1.00321300  | 2.15334000  | 1.86392600  |
| H  | 0.57036400  | 1.72287600  | 3.52710100  |
| C  | -1.48064500 | 2.89265800  | 1.07204800  |
| Zn | -0.58489800 | 0.49228600  | -0.02122800 |



|   |             |             |             |
|---|-------------|-------------|-------------|
| C | -3.72772800 | -4.66625400 | 1.18745700  |
| C | -4.98179100 | -4.87704500 | 0.60384700  |
| C | -5.62034600 | -3.87866000 | -0.14661900 |
| C | -4.95684300 | -2.66852100 | -0.30345900 |
| C | -3.67587500 | -2.45548600 | 0.25102000  |
| C | -3.06785400 | -3.44386400 | 1.01654300  |
| N | -5.39996800 | -1.51666100 | -0.96806100 |
| C | -4.47958400 | -0.48653700 | -0.85374300 |
| C | -3.27678400 | -1.08076600 | -0.09416400 |
| O | -2.40628900 | -0.37796900 | 0.46699800  |
| O | -4.62721700 | 0.66153800  | -1.23752500 |
| H | -3.26657500 | -5.45203000 | 1.77683900  |
| H | -5.48217900 | -5.83079200 | 0.74184100  |
| H | -6.60145000 | -4.04686200 | -0.57712900 |
| H | -2.10011700 | -3.27026400 | 1.47444300  |
| C | -6.68114800 | -1.38422200 | -1.63237300 |
| H | -7.50187600 | -1.56189600 | -0.92955800 |
| H | -6.74725300 | -0.36557400 | -2.01590000 |
| H | -6.76128900 | -2.09305600 | -2.46313400 |
| O | 2.00351300  | 0.50457500  | 0.10915600  |
| C | 7.82592600  | -0.95119600 | 2.75873400  |
| H | 8.00651000  | -1.84383800 | 3.36587700  |
| H | 8.51840100  | -0.98808600 | 1.90756500  |
| H | 8.09077100  | -0.07066100 | 3.35338200  |
| C | 0.37255400  | -4.99114300 | -2.59112500 |
| H | -0.48582800 | -4.60970200 | -3.15803400 |
| H | 1.14252700  | -5.29472200 | -3.30636600 |
| H | 0.03192200  | -5.88509200 | -2.05564200 |
| O | 3.78913800  | 0.31745800  | -1.55749800 |
| O | 2.13148900  | 1.89608100  | -1.79070200 |
| C | 3.12759500  | 2.20379700  | -2.81210900 |
| C | 3.96749800  | 3.36377300  | -2.27311700 |
| C | 2.40120400  | 2.61112600  | -4.08677400 |
| H | 4.49400700  | 3.07935200  | -1.35647700 |
| H | 4.70489900  | 3.69794500  | -3.00894900 |
| H | 3.30518500  | 4.20297300  | -2.04115400 |
| H | 1.67934000  | 1.85234800  | -4.39627000 |
| H | 1.86196200  | 3.54848900  | -3.91885800 |
| H | 3.11536500  | 2.77002800  | -4.90150200 |
| C | 3.92986400  | 0.85446500  | -2.91006600 |
| C | 3.28906300  | -0.16225800 | -3.85792400 |
| C | 5.41397800  | 1.00746800  | -3.21262200 |
| H | 2.22229600  | -0.28615100 | -3.64961800 |
| H | 3.40717200  | 0.14143700  | -4.90215000 |

|   |             |             |             |
|---|-------------|-------------|-------------|
| H | 3.77555900  | -1.13245400 | -3.72229300 |
| H | 5.91912400  | 1.60545400  | -2.45135600 |
| H | 5.88636700  | 0.02064800  | -3.24296200 |
| H | 5.55877900  | 1.48414000  | -4.18766300 |
| B | 2.64729300  | 0.86969600  | -1.04156300 |
| C | -2.56501100 | -1.64314900 | -2.23222000 |
| H | -3.27911500 | -2.29175100 | -2.69522200 |
| C | -1.50238200 | -1.00652100 | -2.25114200 |
| C | -0.37787900 | -0.23797300 | -1.98398000 |
| H | 0.55344500  | -0.80112300 | -1.93878400 |
| H | -0.28689600 | 0.69636000  | -2.54160700 |

**Int-VB**

|   |             |             |             |
|---|-------------|-------------|-------------|
| C | -1.72431600 | -2.02871900 | -2.50997900 |
| C | -1.85044400 | -3.06570400 | -1.58339500 |
| C | -1.87049700 | -2.81543400 | -0.20263000 |
| C | -1.75627800 | -1.49433600 | 0.20958700  |
| C | -1.62905000 | -0.44722900 | -0.71210400 |
| C | -1.61665800 | -0.69939700 | -2.07203100 |
| N | -1.71560600 | -0.99264500 | 1.52271400  |
| C | -1.46654200 | 0.35907400  | 1.53436400  |
| C | -1.49325500 | 0.85605100  | 0.04702300  |
| O | -0.31255100 | 1.58197900  | -0.27529000 |
| O | -1.27262000 | 1.05410500  | 2.51667800  |
| H | -1.71018700 | -2.25076600 | -3.57230300 |
| H | -1.93478200 | -4.09039500 | -1.93305900 |
| H | -1.96323600 | -3.62758300 | 0.51031200  |
| H | -1.51440200 | 0.11651100  | -2.78162200 |
| C | -1.65284800 | -1.82276500 | 2.70911600  |
| H | -0.76088100 | -2.45921200 | 2.68355700  |
| H | -1.60170400 | -1.16106300 | 3.57392400  |
| H | -2.54338900 | -2.45375500 | 2.78190600  |
| O | 2.02375200  | 1.46087300  | -0.74676800 |
| O | 1.09996600  | -0.19374300 | 0.56501100  |
| C | 2.41774300  | -0.68238200 | 0.17339100  |
| C | 2.19026200  | -1.65673700 | -0.98546500 |
| C | 3.04227300  | -1.39816500 | 1.36244600  |
| H | 1.74739400  | -1.15061700 | -1.84861400 |
| H | 3.12502100  | -2.13099200 | -1.29862300 |
| H | 1.49472800  | -2.43569800 | -0.65968600 |
| H | 3.06593500  | -0.76019100 | 2.24825000  |
| H | 2.45799700  | -2.29290900 | 1.59948800  |
| H | 4.06464200  | -1.71188200 | 1.12758200  |
| C | 3.13893400  | 0.64725900  | -0.26031100 |

|   |             |             |             |
|---|-------------|-------------|-------------|
| C | 3.75942900  | 1.40327400  | 0.91592600  |
| C | 4.14738900  | 0.48610200  | -1.38937400 |
| H | 3.04317700  | 1.51702500  | 1.73550900  |
| H | 4.64612500  | 0.88796100  | 1.29684600  |
| H | 4.05763600  | 2.40078800  | 0.58005900  |
| H | 3.67953300  | 0.08501600  | -2.29088700 |
| H | 4.58719100  | 1.45801800  | -1.63365100 |
| H | 4.95651700  | -0.18631100 | -1.08557100 |
| B | 0.89933300  | 0.96366600  | -0.14425700 |
| C | -2.68935500 | 1.76090500  | -0.15433900 |
| H | -3.66136500 | 1.29625800  | 0.00139600  |
| C | -2.59947200 | 3.02094000  | -0.49113500 |
| C | -2.52337100 | 4.27765200  | -0.83687900 |
| H | -2.51512500 | 4.58221500  | -1.88189900 |
| H | -2.46028200 | 5.06972900  | -0.09294800 |

**(S)-3ba**

|   |             |             |             |
|---|-------------|-------------|-------------|
| C | 2.03301500  | -2.51115000 | -0.07889700 |
| C | 3.05430000  | -1.58912500 | 0.15975100  |
| C | 2.79185400  | -0.21397500 | 0.24759700  |
| C | 1.47541600  | 0.19663100  | 0.08307300  |
| C | 0.44171200  | -0.71939900 | -0.15780900 |
| C | 0.70806600  | -2.07518500 | -0.23350300 |
| N | 0.96307800  | 1.50877800  | 0.11812200  |
| C | -0.39005600 | 1.51695200  | -0.10883100 |
| C | -0.86207900 | 0.03645800  | -0.25996300 |
| O | -1.11032500 | 2.49861300  | -0.21220400 |
| H | 2.26404600  | -3.56984400 | -0.14146300 |
| H | 4.07520000  | -1.93856600 | 0.28229000  |
| H | 3.58996800  | 0.49635700  | 0.43447000  |
| H | -0.09563800 | -2.78375500 | -0.41023400 |
| C | 1.76873800  | 2.70458900  | 0.27101200  |
| H | 2.51017200  | 2.77353700  | -0.53181500 |
| H | 1.09816800  | 3.56285700  | 0.22214600  |
| H | 2.28546800  | 2.69756300  | 1.23588900  |
| C | -1.82027600 | -0.31418800 | 0.86668300  |
| H | -1.43247700 | -0.22433000 | 1.88042000  |
| C | -3.05183600 | -0.69766200 | 0.65189400  |
| C | -4.27947900 | -1.08028400 | 0.42093700  |
| H | -4.53365600 | -2.13013000 | 0.28631700  |
| H | -5.09680900 | -0.36417100 | 0.35779400  |
| O | -1.44167800 | -0.13275900 | -1.54249100 |
| H | -2.20621800 | 0.47022100  | -1.57676600 |

**TS-C**

|   |             |             |             |
|---|-------------|-------------|-------------|
| N | -0.10537400 | -0.67847200 | -2.00716300 |
| C | 1.35937700  | -0.50368300 | -2.25251600 |
| H | 1.79048100  | -1.50265200 | -2.25452900 |
| C | 1.46912600  | 0.12557200  | -3.65911800 |
| H | 1.64246000  | -0.67101600 | -4.38689300 |
| H | 2.32280200  | 0.79890600  | -3.74288100 |
| C | 0.10247200  | 0.80773900  | -3.91885700 |
| H | -0.36459000 | 0.40355200  | -4.82089600 |
| H | 0.19663600  | 1.88741400  | -4.05980200 |
| C | -0.73978300 | 0.50226700  | -2.66457400 |
| H | -1.78725000 | 0.27891700  | -2.86686400 |
| H | -0.70706400 | 1.32698400  | -1.95905100 |
| C | 2.10857900  | 0.21071400  | -1.08484200 |
| C | 3.61950000  | 0.07401600  | -1.35192800 |
| C | 4.49005600  | 1.16134900  | -1.44278100 |
| C | 4.16911500  | -1.21634800 | -1.44538500 |
| C | 5.86061300  | 0.96743700  | -1.62869200 |
| H | 4.11385800  | 2.17162300  | -1.34519700 |
| C | 5.53563900  | -1.40549300 | -1.62138300 |
| H | 3.53347900  | -2.09058500 | -1.34526700 |
| C | 6.41069900  | -0.31398100 | -1.72062500 |
| H | 6.51326900  | 1.83460000  | -1.68810100 |
| H | 5.92999900  | -2.41690800 | -1.67765500 |
| C | 1.69046300  | 1.65109300  | -0.76437300 |
| C | 1.33698500  | 2.02522800  | 0.53909000  |
| C | 1.76255500  | 2.67357400  | -1.72315300 |
| C | 1.09150200  | 3.35533100  | 0.87262400  |
| H | 1.25242200  | 1.28065800  | 1.31395000  |
| C | 1.50549600  | 4.00376100  | -1.38835300 |
| H | 2.05626800  | 2.45650300  | -2.74062700 |
| C | 1.17812000  | 4.37571400  | -0.08036100 |
| H | 0.83556200  | 3.60207400  | 1.89988300  |
| H | 1.57906500  | 4.76473700  | -2.16058900 |
| C | -1.95564900 | -2.34497700 | -2.43577500 |
| C | -2.93062200 | -2.34090900 | -3.43037000 |
| C | -3.57796100 | -3.28458700 | -0.88772400 |
| C | -4.22746300 | -2.79834000 | -3.17436800 |
| H | -2.66733300 | -1.98593700 | -4.42472000 |
| C | -4.53853000 | -3.27628300 | -1.90272800 |
| H | -4.97959000 | -2.79092000 | -3.95647100 |
| H | -5.53700400 | -3.64200700 | -1.68847700 |
| C | -3.90810100 | -3.80773800 | 0.47271500  |
| O | -1.35050800 | -2.77998300 | -0.17407200 |

|    |             |             |             |
|----|-------------|-------------|-------------|
| F  | -3.18138100 | -4.91202200 | 0.79451200  |
| F  | -3.68335800 | -2.90738500 | 1.45904200  |
| F  | -5.21337300 | -4.17182000 | 0.57897900  |
| C  | -0.53544400 | -1.94849500 | -2.70443000 |
| H  | 0.12951900  | -2.73174900 | -2.33052600 |
| H  | -0.36974900 | -1.84686200 | -3.78274800 |
| C  | -2.26539700 | -2.80530400 | -1.12628900 |
| Zn | -0.68649900 | -0.93652100 | 0.05869300  |
| C  | -2.39620500 | 4.79692800  | -0.75698400 |
| C  | -3.57812500 | 5.30713600  | -0.21260500 |
| C  | -4.43565000 | 4.50264600  | 0.55359500  |
| C  | -4.06435000 | 3.17914600  | 0.75652400  |
| C  | -2.86209100 | 2.66190200  | 0.23555800  |
| C  | -2.03005600 | 3.46233200  | -0.53124600 |
| N  | -4.77212900 | 2.17242500  | 1.43432100  |
| C  | -4.11810000 | 0.95534500  | 1.35290600  |
| C  | -2.78172100 | 1.22715000  | 0.62790400  |
| O  | -2.24995500 | 0.31957000  | -0.09839900 |
| O  | -4.52869200 | -0.10981000 | 1.78708800  |
| H  | -1.75642800 | 5.43474500  | -1.35839600 |
| H  | -3.84810700 | 6.34390600  | -0.39076000 |
| H  | -5.35965800 | 4.90114500  | 0.95884700  |
| H  | -1.10638200 | 3.06946300  | -0.93573600 |
| C  | -6.05883000 | 2.35563600  | 2.07396200  |
| H  | -6.80678900 | 2.69720000  | 1.35021700  |
| H  | -6.36296500 | 1.39046600  | 2.48057100  |
| H  | -5.98721600 | 3.08802100  | 2.88511800  |
| O  | 1.77341200  | -0.65478200 | 0.03530400  |
| C  | 7.88936900  | -0.52395300 | -1.93108700 |
| H  | 8.26636300  | -1.34491600 | -1.31152000 |
| H  | 8.10528700  | -0.78276700 | -2.97570500 |
| H  | 8.45887700  | 0.37853900  | -1.68956300 |
| C  | 0.90630200  | 5.81033700  | 0.29275300  |
| H  | 1.13527800  | 6.48862500  | -0.53466900 |
| H  | -0.14864800 | 5.94801000  | 0.55822600  |
| H  | 1.50322400  | 6.11462700  | 1.16009400  |
| C  | -0.41500800 | -0.69501400 | 2.16601300  |
| H  | 0.26854000  | -1.43813500 | 2.54143900  |
| C  | -1.01493400 | 0.35477400  | 2.48253300  |
| O  | 3.55387200  | 0.02015100  | 1.56012600  |
| O  | 2.41297000  | -1.94796200 | 1.91899200  |
| C  | 3.53851400  | -1.95386900 | 2.85650400  |
| C  | 4.61277800  | -2.85115800 | 2.23761000  |
| C  | 3.06138600  | -2.51954700 | 4.18645200  |

|   |             |             |            |
|---|-------------|-------------|------------|
| H | 4.96151600  | -2.44987600 | 1.28092300 |
| H | 5.47230300  | -2.95975700 | 2.90556800 |
| H | 4.18655400  | -3.84278200 | 2.05895200 |
| H | 2.19366400  | -1.97685500 | 4.56780900 |
| H | 2.78233100  | -3.57030100 | 4.06174800 |
| H | 3.86162400  | -2.46588900 | 4.93195400 |
| C | 3.94797900  | -0.43623200 | 2.89126300 |
| C | 3.13384400  | 0.38871300  | 3.89098700 |
| C | 5.43863700  | -0.17884700 | 3.06322000 |
| H | 2.05993300  | 0.21293000  | 3.77268600 |
| H | 3.41373000  | 0.15557000  | 4.92248100 |
| H | 3.32593600  | 1.45062100  | 3.71125700 |
| H | 6.01530300  | -0.61877200 | 2.24686100 |
| H | 5.62680900  | 0.89913400  | 3.07331600 |
| H | 5.79352600  | -0.59608000 | 4.01128100 |
| B | 2.58531000  | -0.83910300 | 1.12862200 |
| C | -1.78823800 | 1.49356800  | 2.47254100 |
| H | -2.62399500 | 1.53389600  | 3.16636500 |
| H | -1.26979900 | 2.44103700  | 2.34373900 |

#### Int-III C

|   |             |             |             |
|---|-------------|-------------|-------------|
| N | -0.05590700 | -0.44518500 | -2.22580800 |
| C | 1.40466300  | -0.15891300 | -2.32656600 |
| H | 1.90148700  | -1.12578700 | -2.32688100 |
| C | 1.62338400  | 0.52470500  | -3.69918100 |
| H | 2.05265400  | -0.20352200 | -4.39144600 |
| H | 2.34001600  | 1.34493800  | -3.64080100 |
| C | 0.21427000  | 0.96178800  | -4.17865100 |
| H | -0.06955300 | 0.40529700  | -5.07621000 |
| H | 0.16642900  | 2.02410500  | -4.43458900 |
| C | -0.72621300 | 0.63604900  | -3.00283800 |
| H | -1.71723100 | 0.29248700  | -3.30699000 |
| H | -0.85917400 | 1.48786500  | -2.33774200 |
| C | 1.99860700  | 0.51984500  | -1.05412100 |
| C | 3.52700300  | 0.44830400  | -1.18637200 |
| C | 4.33134600  | 1.58970400  | -1.19488500 |
| C | 4.15561000  | -0.80269400 | -1.30001900 |
| C | 5.71963500  | 1.48383000  | -1.30277900 |
| H | 3.88287400  | 2.57136200  | -1.10437300 |
| C | 5.53915800  | -0.90416400 | -1.39616900 |
| H | 3.56876600  | -1.71643900 | -1.28361100 |
| C | 6.35028500  | 0.24027400  | -1.40061600 |
| H | 6.32095000  | 2.38922100  | -1.30015800 |
| H | 5.99734300  | -1.88729500 | -1.46744500 |

|    |             |             |             |
|----|-------------|-------------|-------------|
| C  | 1.54005900  | 1.92859300  | -0.66986600 |
| C  | 1.52234000  | 2.29484300  | 0.68468000  |
| C  | 1.29819700  | 2.93784400  | -1.60913000 |
| C  | 1.28050900  | 3.60794600  | 1.07725800  |
| H  | 1.72350700  | 1.55789800  | 1.44817100  |
| C  | 1.05278100  | 4.25397800  | -1.21226300 |
| H  | 1.32139100  | 2.73163900  | -2.66793300 |
| C  | 1.04364400  | 4.61872400  | 0.13683800  |
| H  | 1.28249300  | 3.85199800  | 2.13684100  |
| H  | 0.86927400  | 5.00773500  | -1.97325800 |
| C  | -1.66358000 | -2.39129000 | -2.52590800 |
| C  | -2.59116500 | -2.66891200 | -3.52776900 |
| C  | -3.04476200 | -3.62517300 | -0.94745000 |
| C  | -3.75121300 | -3.40176200 | -3.25919800 |
| H  | -2.38818300 | -2.32720200 | -4.54056600 |
| C  | -3.95439200 | -3.89833300 | -1.97367000 |
| H  | -4.46789000 | -3.60948400 | -4.04698000 |
| H  | -4.82624900 | -4.50595600 | -1.75771700 |
| C  | -3.22968500 | -4.23572900 | 0.40707700  |
| O  | -1.06296500 | -2.49810800 | -0.21446600 |
| F  | -2.19445600 | -5.05316800 | 0.74017300  |
| F  | -3.33398600 | -3.33431600 | 1.40957300  |
| F  | -4.35091700 | -5.00241100 | 0.46959600  |
| C  | -0.32202300 | -1.79186700 | -2.83991900 |
| H  | 0.44396800  | -2.45964600 | -2.43598400 |
| H  | -0.17911400 | -1.73748400 | -3.92620400 |
| C  | -1.90108300 | -2.82256400 | -1.18918700 |
| Zn | -0.74143800 | -0.57492600 | -0.18298900 |
| C  | -3.14438200 | 5.22824400  | 0.06211500  |
| C  | -4.50102600 | 5.25182800  | 0.39352800  |
| C  | -5.16251300 | 4.09480800  | 0.83396100  |
| C  | -4.41266700 | 2.92864000  | 0.93882000  |
| C  | -3.04456100 | 2.89896900  | 0.63649200  |
| C  | -2.40622000 | 4.03928200  | 0.18400000  |
| N  | -4.84968600 | 1.64132400  | 1.29859100  |
| C  | -3.82662600 | 0.72055400  | 1.19045100  |
| C  | -2.50635500 | 1.49833400  | 0.87222400  |
| O  | -1.80933900 | 0.99588300  | -0.19796500 |
| O  | -3.95369000 | -0.48683600 | 1.33525800  |
| H  | -2.65870600 | 6.13086600  | -0.29686300 |
| H  | -5.06284100 | 6.17678600  | 0.29981500  |
| H  | -6.22110600 | 4.11362200  | 1.07126900  |
| H  | -1.35789100 | 4.00221600  | -0.08645800 |
| C  | -6.22760200 | 1.28852700  | 1.57286200  |

|   |             |             |             |
|---|-------------|-------------|-------------|
| H | -6.86926400 | 1.54021500  | 0.72090000  |
| H | -6.26268100 | 0.21270900  | 1.74795000  |
| H | -6.59238700 | 1.81619200  | 2.46033200  |
| O | 1.55120600  | -0.41250600 | -0.00660500 |
| C | 7.84888900  | 0.12615800  | -1.52717700 |
| H | 8.23609200  | -0.70676800 | -0.93053300 |
| H | 8.14249300  | -0.05839900 | -2.56861200 |
| H | 8.34745700  | 1.04391400  | -1.20114000 |
| C | 0.74813600  | 6.03140700  | 0.57204500  |
| H | 0.84148700  | 6.73448300  | -0.26102000 |
| H | -0.27506300 | 6.11045500  | 0.96164000  |
| H | 1.42393000  | 6.35207300  | 1.37226300  |
| C | -0.51906500 | -0.88575200 | 2.51219300  |
| H | -0.07038700 | -1.84905500 | 2.60622200  |
| C | -1.01765200 | 0.21444600  | 2.40961500  |
| O | 3.30209200  | -0.13057700 | 1.66873100  |
| O | 2.10906400  | -2.09483200 | 1.58394500  |
| C | 3.19934600  | -2.33298600 | 2.53270400  |
| C | 4.24811100  | -3.16019800 | 1.78666400  |
| C | 2.64847600  | -3.11447700 | 3.71771900  |
| H | 4.65241800  | -2.61117900 | 0.93166300  |
| H | 5.07575200  | -3.43776600 | 2.44589000  |
| H | 3.77893300  | -4.07639400 | 1.41617800  |
| H | 1.81029800  | -2.59871300 | 4.19098700  |
| H | 2.30305300  | -4.09655200 | 3.38062100  |
| H | 3.42968200  | -3.26785400 | 4.46933800  |
| C | 3.68274200  | -0.87150000 | 2.86982400  |
| C | 2.92483900  | -0.22893200 | 4.03314200  |
| C | 5.18684000  | -0.72302500 | 3.05963800  |
| H | 1.84211100  | -0.30113100 | 3.89313400  |
| H | 3.18882500  | -0.69594600 | 4.98644600  |
| H | 3.19034000  | 0.83138700  | 4.08355000  |
| H | 5.73342600  | -1.01629600 | 2.16098300  |
| H | 5.42624000  | 0.32193300  | 3.27916100  |
| H | 5.53117000  | -1.33518600 | 3.89950900  |
| B | 2.32317800  | -0.85250300 | 1.05040000  |
| C | -1.64216100 | 1.51092700  | 2.18882000  |
| H | -2.25318600 | 1.79995600  | 3.05187300  |
| H | -0.86780500 | 2.27322900  | 2.05809800  |

**Int-IVC**

|   |            |             |             |
|---|------------|-------------|-------------|
| C | 4.17802700 | -2.19478800 | -0.74647100 |
| C | 4.84711900 | -1.09182500 | -1.28059300 |
| C | 4.33135200 | 0.20659500  | -1.15570000 |



|                 |             |             |             |
|-----------------|-------------|-------------|-------------|
| C               | 3.12902600  | 0.35325800  | -0.47566100 |
| C               | 2.45496900  | -0.74299900 | 0.07451000  |
| C               | 2.96472000  | -2.02235200 | -0.06222400 |
| N               | 2.40995200  | 1.53298000  | -0.22180600 |
| C               | 1.26811200  | 1.28757000  | 0.50993200  |
| C               | 1.17973400  | -0.26286800 | 0.72927200  |
| O               | 0.08815400  | -0.92035600 | 0.10860900  |
| O               | 0.52264100  | 2.13938700  | 0.95936200  |
| H               | 4.59629900  | -3.18968700 | -0.86139600 |
| H               | 5.78610000  | -1.23658600 | -1.80661600 |
| H               | 4.85384000  | 1.05846500  | -1.57716300 |
| H               | 2.43362700  | -2.87660800 | 0.34752200  |
| C               | 2.85906100  | 2.86267200  | -0.58350000 |
| H               | 2.95978700  | 2.95031500  | -1.66999900 |
| H               | 2.11157700  | 3.57159400  | -0.22720700 |
| H               | 3.82462900  | 3.08291700  | -0.11597400 |
| C               | -1.17837900 | 0.00191800  | 3.41994700  |
| H               | -2.10501700 | 0.23976600  | 3.89320000  |
| C               | -0.12273500 | -0.23453000 | 2.88273000  |
| O               | -2.09497800 | -1.48813200 | -0.53014300 |
| O               | -1.69660400 | 0.75019200  | -0.16017600 |
| C               | -3.01647600 | 0.66858600  | -0.77575900 |
| C               | -2.83644600 | 1.03422600  | -2.25117500 |
| C               | -3.93305500 | 1.67078600  | -0.08628300 |
| H               | -2.18155300 | 0.31946500  | -2.75927000 |
| H               | -3.79581200 | 1.06200000  | -2.77657300 |
| H               | -2.37783800 | 2.02538500  | -2.31728600 |
| H               | -3.95053800 | 1.51914400  | 0.99492700  |
| H               | -3.58134000 | 2.68817900  | -0.28361300 |
| H               | -4.95507100 | 1.58349400  | -0.47014000 |
| C               | -3.39909800 | -0.84023600 | -0.55317200 |
| C               | -4.04515200 | -1.10230400 | 0.81028800  |
| C               | -4.23488600 | -1.45958000 | -1.66596900 |
| H               | -3.44710900 | -0.67097600 | 1.61877900  |
| H               | -5.05645700 | -0.68809300 | 0.86164100  |
| H               | -4.10623200 | -2.18289100 | 0.97117600  |
| H               | -3.72037100 | -1.41451200 | -2.62818900 |
| H               | -4.43710700 | -2.51002700 | -1.43417900 |
| H               | -5.19518600 | -0.94117500 | -1.75756200 |
| B               | -1.18852800 | -0.52101800 | -0.15493200 |
| C               | 1.14618300  | -0.57651700 | 2.24503400  |
| <b>(S)-3ba'</b> |             |             |             |
| C               | -2.82640300 | -1.82512500 | -0.05895900 |

|   |             |             |             |
|---|-------------|-------------|-------------|
| C | -3.43966100 | -0.59875900 | -0.32333600 |
| C | -2.70517900 | 0.59619100  | -0.34836200 |
| C | -1.34084900 | 0.51291500  | -0.10146800 |
| C | -0.71109000 | -0.71325900 | 0.15514700  |
| C | -1.44484700 | -1.88733000 | 0.18043500  |
| N | -0.40062500 | 1.55729300  | -0.04402900 |
| C | 0.85092300  | 1.08821800  | 0.29217900  |
| C | 0.76862700  | -0.47025400 | 0.34798500  |
| O | 1.83736600  | 1.77453500  | 0.50381000  |
| H | -3.41981000 | -2.73369600 | -0.03887700 |
| H | -4.50875500 | -0.56274200 | -0.51068500 |
| H | -3.19006200 | 1.54554400  | -0.54861200 |
| H | -0.95942600 | -2.83603800 | 0.39107100  |
| C | -0.72383100 | 2.96300900  | -0.18719900 |
| H | -1.45523900 | 3.26968100  | 0.56822600  |
| H | 0.19835700  | 3.52845600  | -0.05137400 |
| H | -1.13322300 | 3.16267600  | -1.18248300 |
| C | 4.22216500  | -0.74448600 | -0.70508100 |
| H | 5.28004000  | -0.60783100 | -0.66756400 |
| C | 3.02276900  | -0.88240400 | -0.73353300 |
| C | 1.57881300  | -1.09274300 | -0.81342700 |
| H | 1.18962100  | -0.69907900 | -1.75968300 |
| H | 1.36384000  | -2.16841700 | -0.80810200 |
| O | 1.31134900  | -0.99505300 | 1.54734900  |
| H | 0.74069300  | -0.71129900 | 2.28072900  |

**Int-IID**

|   |             |             |             |
|---|-------------|-------------|-------------|
| N | 0.21573600  | -0.37872500 | -2.02912200 |
| C | 1.65329800  | 0.07645300  | -2.22687100 |
| H | 2.18929500  | -0.80757700 | -2.57593000 |
| C | 1.65603400  | 1.10960800  | -3.37095400 |
| H | 2.53939700  | 0.98524700  | -4.00104900 |
| H | 1.67168600  | 2.13098200  | -2.98504200 |
| C | 0.34205500  | 0.83137000  | -4.11502000 |
| H | 0.46990000  | 0.00890500  | -4.82785300 |
| H | -0.02173300 | 1.69960400  | -4.67159600 |
| C | -0.61054500 | 0.43133600  | -2.98725200 |
| H | -1.46373300 | -0.16603400 | -3.30955500 |
| H | -1.00769800 | 1.30493300  | -2.47149000 |
| C | 2.42398800  | 0.47197100  | -0.93332700 |
| C | 3.90614000  | 0.35499300  | -1.29966600 |
| C | 4.63096100  | 1.46481200  | -1.74498600 |
| C | 4.53237000  | -0.89726100 | -1.31837000 |
| C | 5.95302600  | 1.32883700  | -2.16949200 |

|    |             |             |             |
|----|-------------|-------------|-------------|
| H  | 4.16469500  | 2.44376000  | -1.75965500 |
| C  | 5.85492900  | -1.02750300 | -1.73429700 |
| H  | 3.98389000  | -1.78068800 | -1.00813100 |
| C  | 6.59315000  | 0.08423800  | -2.16220700 |
| H  | 6.49490400  | 2.20745900  | -2.51025200 |
| H  | 6.32065800  | -2.00980400 | -1.72972200 |
| C  | 2.08708100  | 1.81967500  | -0.29181500 |
| C  | 2.93424100  | 2.33462100  | 0.70446900  |
| C  | 0.92591000  | 2.53968300  | -0.58350500 |
| C  | 2.61793400  | 3.50664000  | 1.38492700  |
| H  | 3.83813100  | 1.80090600  | 0.96337900  |
| C  | 0.61850700  | 3.72357700  | 0.08798700  |
| H  | 0.21591300  | 2.19381900  | -1.31689200 |
| C  | 1.45332700  | 4.22835300  | 1.08774700  |
| H  | 3.28954800  | 3.86749600  | 2.16031200  |
| H  | -0.30009900 | 4.23958900  | -0.17193800 |
| C  | -1.17797500 | -2.49055900 | -2.28837500 |
| C  | -1.91259400 | -2.90845300 | -3.39517500 |
| C  | -2.87521000 | -3.45874000 | -0.83913500 |
| C  | -3.12546600 | -3.59083600 | -3.24852100 |
| H  | -1.52360900 | -2.70673700 | -4.39132900 |
| C  | -3.59267600 | -3.87003500 | -1.96611400 |
| H  | -3.68791500 | -3.91056600 | -4.11960500 |
| H  | -4.52343700 | -4.41097400 | -1.83260000 |
| C  | -3.36146500 | -3.79304300 | 0.53165500  |
| O  | -0.98370400 | -2.32128000 | 0.07357400  |
| F  | -2.49492800 | -4.57800200 | 1.22033400  |
| F  | -3.56472700 | -2.69420800 | 1.31878300  |
| F  | -4.54558900 | -4.45571900 | 0.51285300  |
| C  | 0.16545400  | -1.83940700 | -2.42747200 |
| H  | 0.88622800  | -2.34140400 | -1.77683300 |
| H  | 0.51948400  | -1.93220300 | -3.46154200 |
| C  | -1.65657100 | -2.74080200 | -0.97168700 |
| Zn | -0.47850600 | -0.40274200 | 0.01622100  |
| C  | -6.59948900 | 0.33229600  | 1.35628900  |
| C  | -7.11069600 | 1.63508100  | 1.32207200  |
| C  | -6.38459400 | 2.70145900  | 0.76791400  |
| C  | -5.12976000 | 2.41728900  | 0.25035300  |
| C  | -4.59919300 | 1.10895200  | 0.29027700  |
| C  | -5.33071700 | 0.05802400  | 0.83572100  |
| N  | -4.21949700 | 3.29881100  | -0.35628400 |
| C  | -3.07736900 | 2.63549000  | -0.74819000 |
| C  | -3.27981400 | 1.15974800  | -0.33411600 |
| O  | -2.52352000 | 0.24195900  | -0.65992800 |

|   |             |             |             |
|---|-------------|-------------|-------------|
| O | -2.13341500 | 3.11047700  | -1.36578600 |
| H | -7.19104700 | -0.46689100 | 1.79084400  |
| H | -8.09677000 | 1.83192800  | 1.73201100  |
| H | -6.79625200 | 3.70444200  | 0.74671400  |
| H | -4.91290500 | -0.94181200 | 0.86185300  |
| C | -4.43716400 | 4.72024600  | -0.53848200 |
| H | -4.54159500 | 5.22098800  | 0.42969800  |
| H | -3.56991000 | 5.12126700  | -1.06381900 |
| H | -5.33788500 | 4.89810400  | -1.13429300 |
| O | 2.03284300  | -0.58811700 | -0.01032700 |
| C | 8.03599200  | -0.05491900 | -2.58107000 |
| H | 8.22398100  | -1.02737600 | -3.04794500 |
| H | 8.32347500  | 0.72860600  | -3.28941300 |
| H | 8.70650000  | 0.02480700  | -1.71530200 |
| C | 1.12518700  | 5.51158200  | 1.80912300  |
| H | 0.05593700  | 5.73801200  | 1.75074000  |
| H | 1.40896300  | 5.45857400  | 2.86562500  |
| H | 1.66610600  | 6.36046700  | 1.37076400  |
| O | 3.77931600  | -0.38444900 | 1.69879200  |
| O | 1.99394600  | -1.79945300 | 2.01394000  |
| C | 2.92481900  | -2.07388700 | 3.10316400  |
| C | 3.69796400  | -3.33650000 | 2.71622000  |
| C | 2.12317900  | -2.30115100 | 4.37762400  |
| H | 4.27962400  | -3.17949100 | 1.80227600  |
| H | 4.37927900  | -3.64766700 | 3.51365400  |
| H | 2.98558200  | -4.14662700 | 2.53432900  |
| H | 1.44826500  | -1.46670900 | 4.57968300  |
| H | 1.52303300  | -3.21083800 | 4.27720300  |
| H | 2.79246200  | -2.42761900 | 5.23513100  |
| C | 3.81803600  | -0.78062100 | 3.10541300  |
| C | 3.20585400  | 0.37297200  | 3.90441700  |
| C | 5.27079400  | -1.00040400 | 3.50284800  |
| H | 2.16355400  | 0.54561300  | 3.61906500  |
| H | 3.24679400  | 0.17621700  | 4.97974700  |
| H | 3.76906800  | 1.28769300  | 3.69828200  |
| H | 5.76617800  | -1.70907500 | 2.83589800  |
| H | 5.81228300  | -0.05031800 | 3.45753800  |
| H | 5.33423800  | -1.37944500 | 4.52818600  |
| B | 2.61012300  | -0.88866100 | 1.19322700  |
| C | -2.21586200 | 2.32392300  | 2.02896300  |
| H | -1.55302200 | 3.11091300  | 1.68074700  |
| H | -3.21765400 | 2.61162400  | 2.32811800  |
| C | -1.77132300 | 1.05235900  | 2.18427800  |
| H | -2.49173500 | 0.31533100  | 2.54580300  |

|   |             |             |            |
|---|-------------|-------------|------------|
| C | -0.46008400 | 0.53849900  | 1.82969600 |
| H | 0.31446200  | 1.30455700  | 1.77130900 |
| H | -0.14214000 | -0.29852800 | 2.45774000 |

**TS-D**

|   |             |             |             |
|---|-------------|-------------|-------------|
| N | 0.18220000  | -0.25321200 | -2.05148300 |
| C | 1.61433400  | 0.21977800  | -2.22606500 |
| H | 2.15449500  | -0.64009900 | -2.62501200 |
| C | 1.60930500  | 1.31372700  | -3.31227400 |
| H | 2.49382200  | 1.23071800  | -3.94748100 |
| H | 1.61600500  | 2.31297900  | -2.87216600 |
| C | 0.29743000  | 1.06439800  | -4.07036700 |
| H | 0.43151800  | 0.27984100  | -4.82367400 |
| H | -0.07258600 | 1.95708200  | -4.58223600 |
| C | -0.65145400 | 0.60096400  | -2.96429900 |
| H | -1.50231700 | 0.01580400  | -3.31477000 |
| H | -1.05264800 | 1.44271100  | -2.40034600 |
| C | 2.38596000  | 0.54994900  | -0.91444800 |
| C | 3.86590200  | 0.43949700  | -1.29176000 |
| C | 4.60008400  | 1.56509000  | -1.67654600 |
| C | 4.47752800  | -0.81679600 | -1.38942800 |
| C | 5.91823100  | 1.43954800  | -2.11755500 |
| H | 4.14505700  | 2.54836300  | -1.63212800 |
| C | 5.79538600  | -0.93708600 | -1.82106800 |
| H | 3.92093000  | -1.71131800 | -1.12908900 |
| C | 6.54385200  | 0.19011400  | -2.18794500 |
| H | 6.46763800  | 2.33063900  | -2.41032800 |
| H | 6.24955400  | -1.92315000 | -1.87798000 |
| C | 2.05909200  | 1.86635600  | -0.20685800 |
| C | 2.91663500  | 2.32734100  | 0.80826300  |
| C | 0.89602400  | 2.60108700  | -0.44872700 |
| C | 2.60861700  | 3.46161200  | 1.55212200  |
| H | 3.82243100  | 1.77995700  | 1.02933200  |
| C | 0.59721400  | 3.74934500  | 0.28743700  |
| H | 0.17508800  | 2.29285900  | -1.18990700 |
| C | 1.44194200  | 4.19973700  | 1.30396200  |
| H | 3.28803000  | 3.78029000  | 2.33906700  |
| H | -0.32202400 | 4.27966400  | 0.06119500  |
| C | -1.19323800 | -2.37022900 | -2.37798000 |
| C | -1.95705500 | -2.73848600 | -3.48314800 |
| C | -2.83744000 | -3.43275400 | -0.93257900 |
| C | -3.15709000 | -3.44306200 | -3.33630200 |
| H | -1.60131400 | -2.47986800 | -4.47846900 |
| C | -3.58452600 | -3.79361800 | -2.05745700 |

|    |             |             |             |
|----|-------------|-------------|-------------|
| H  | -3.74195800 | -3.72325200 | -4.20619000 |
| H  | -4.50659300 | -4.34948500 | -1.92508900 |
| C  | -3.27804300 | -3.83426900 | 0.43574100  |
| O  | -0.93022500 | -2.32789500 | -0.01405100 |
| F  | -2.39650600 | -4.66426000 | 1.04847000  |
| F  | -3.43429200 | -2.77560100 | 1.28544600  |
| F  | -4.47042000 | -4.48070100 | 0.42632200  |
| C  | 0.13846400  | -1.69381300 | -2.52034900 |
| H  | 0.88023700  | -2.21823200 | -1.91266700 |
| H  | 0.46718600  | -1.73075300 | -3.56611300 |
| C  | -1.63064100 | -2.69840200 | -1.06446600 |
| Zn | -0.55703800 | -0.39261300 | -0.03507100 |
| C  | -6.50870600 | 0.15262200  | 1.36310000  |
| C  | -7.13980500 | 1.39688300  | 1.27465700  |
| C  | -6.47176200 | 2.52108500  | 0.76361800  |
| C  | -5.15672500 | 2.35234500  | 0.35355800  |
| C  | -4.50295400 | 1.10691700  | 0.45842200  |
| C  | -5.17707700 | -0.00150500 | 0.95220000  |
| N  | -4.29183800 | 3.30457100  | -0.21352700 |
| C  | -3.07966200 | 2.73756300  | -0.55171500 |
| C  | -3.12582100 | 1.28872400  | -0.05051400 |
| O  | -2.37981900 | 0.38948100  | -0.53574700 |
| O  | -2.17385900 | 3.29153200  | -1.16760800 |
| H  | -7.05407900 | -0.70134800 | 1.75303000  |
| H  | -8.17088700 | 1.50057900  | 1.59957000  |
| H  | -6.97229500 | 3.48042900  | 0.68619500  |
| H  | -4.67959300 | -0.96212400 | 1.01581000  |
| C  | -4.64869300 | 4.67954000  | -0.49895400 |
| H  | -4.89834000 | 5.21253100  | 0.42435700  |
| H  | -3.78657600 | 5.15196900  | -0.97095700 |
| H  | -5.50556100 | 4.72394700  | -1.17958300 |
| O  | 1.98458200  | -0.54313200 | -0.03250300 |
| C  | 7.98152600  | 0.05801000  | -2.62626200 |
| H  | 8.13982200  | -0.85872700 | -3.20412000 |
| H  | 8.29151100  | 0.90953300  | -3.24005100 |
| H  | 8.65470500  | 0.01509600  | -1.76005000 |
| C  | 1.12266600  | 5.44092000  | 2.09875900  |
| H  | 0.07643300  | 5.73539800  | 1.97222700  |
| H  | 1.31038300  | 5.28804100  | 3.16730800  |
| H  | 1.74681700  | 6.28553400  | 1.77958500  |
| O  | 3.79063700  | -0.45297800 | 1.62245500  |
| O  | 2.00050600  | -1.86324900 | 1.92666800  |
| C  | 2.97020000  | -2.21085800 | 2.96111300  |
| C  | 3.71042600  | -3.45729300 | 2.47129800  |

|   |             |             |            |
|---|-------------|-------------|------------|
| C | 2.21657400  | -2.50317700 | 4.25129800 |
| H | 4.25806500  | -3.25420700 | 1.54553800 |
| H | 4.41832900  | -3.82093400 | 3.22199300 |
| H | 2.98100800  | -4.24783300 | 2.27176500 |
| H | 1.56330800  | -1.67382600 | 4.53070600 |
| H | 1.59944400  | -3.39764900 | 4.12215500 |
| H | 2.91806100  | -2.68911100 | 5.07135400 |
| C | 3.87975700  | -0.93002300 | 3.00126000 |
| C | 3.31659900  | 0.18294700  | 3.88895300 |
| C | 5.34432100  | -1.18862600 | 3.32553000 |
| H | 2.26636600  | 0.38531500  | 3.65699400 |
| H | 3.39689300  | -0.07579600 | 4.94878500 |
| H | 3.88466600  | 1.10095700  | 3.71301900 |
| H | 5.80278800  | -1.86183700 | 2.59824800 |
| H | 5.89605300  | -0.24349000 | 3.31362800 |
| H | 5.44406800  | -1.62832200 | 4.32332000 |
| B | 2.59988800  | -0.91880400 | 1.13167400 |
| C | -2.27107400 | 2.05444600  | 1.91779800 |
| H | -1.61647500 | 2.84594400  | 1.56635100 |
| H | -3.21601300 | 2.35822700  | 2.35129200 |
| C | -1.71116400 | 0.83316200  | 2.26997800 |
| H | -2.37936100 | 0.09260800  | 2.71247400 |
| C | -0.41225300 | 0.40894100  | 1.93849500 |
| H | 0.33536000  | 1.18095900  | 1.76608500 |

**Int-IIID**

|   |             |             |            |
|---|-------------|-------------|------------|
| N | -0.13808900 | -0.10175900 | 2.09625800 |
| C | -1.58365200 | 0.34930600  | 2.25798200 |
| H | -2.10058900 | -0.51133300 | 2.68858500 |
| C | -1.59486800 | 1.45405400  | 3.32631400 |
| H | -2.52525900 | 1.42551800  | 3.89741100 |
| H | -1.51093100 | 2.44898800  | 2.88403000 |
| C | -0.35692100 | 1.12611500  | 4.17140000 |
| H | -0.57723700 | 0.31417200  | 4.87386800 |
| H | 0.00576400  | 1.98067400  | 4.74881000 |
| C | 0.65354400  | 0.67399800  | 3.11751400 |
| H | 1.45514500  | 0.03851100  | 3.49961700 |
| H | 1.11667700  | 1.52542600  | 2.61653000 |
| C | -2.36857500 | 0.61752200  | 0.94368000 |
| C | -3.84571700 | 0.53760800  | 1.33896200 |
| C | -4.58204100 | 1.68972000  | 1.62850800 |
| C | -4.45409300 | -0.70767100 | 1.54147200 |
| C | -5.89910200 | 1.59829800  | 2.08144600 |
| H | -4.12878400 | 2.66655900  | 1.50053400 |

|    |             |             |             |
|----|-------------|-------------|-------------|
| C  | -5.77026900 | -0.79492600 | 1.98538800  |
| H  | -3.89658300 | -1.61901500 | 1.35028700  |
| C  | -6.52072700 | 0.35747400  | 2.25854600  |
| H  | -6.45079000 | 2.50929000  | 2.29899600  |
| H  | -6.22226100 | -1.77373600 | 2.12503300  |
| C  | -2.03812300 | 1.88873700  | 0.16365500  |
| C  | -2.86032100 | 2.25440500  | -0.91872400 |
| C  | -0.89003000 | 2.64948400  | 0.38901200  |
| C  | -2.52586600 | 3.32105800  | -1.74538500 |
| H  | -3.75542400 | 1.68283800  | -1.12437700 |
| C  | -0.55498300 | 3.72186100  | -0.44164600 |
| H  | -0.20351700 | 2.41128100  | 1.18596600  |
| C  | -1.36193900 | 4.07466900  | -1.52439700 |
| H  | -3.17550500 | 3.56880100  | -2.58158900 |
| H  | 0.37603600  | 4.24823900  | -0.25757600 |
| C  | 1.20805500  | -2.29471300 | 2.24677600  |
| C  | 1.81066900  | -2.90363900 | 3.34718400  |
| C  | 2.75035000  | -3.49086800 | 0.79243800  |
| C  | 2.89090000  | -3.77780400 | 3.19821300  |
| H  | 1.40321000  | -2.71337300 | 4.33777900  |
| C  | 3.32629600  | -4.09502100 | 1.91457100  |
| H  | 3.35171500  | -4.23981900 | 4.06488900  |
| H  | 4.11566300  | -4.82483100 | 1.77353900  |
| C  | 3.13830300  | -3.94877200 | -0.57885100 |
| O  | 1.25761200  | -1.85526200 | -0.10502400 |
| F  | 2.06917100  | -4.38998000 | -1.28851500 |
| F  | 3.72132000  | -2.98965800 | -1.35030400 |
| F  | 4.02435000  | -4.97528200 | -0.54049600 |
| C  | -0.10700900 | -1.57878600 | 2.40336900  |
| H  | -0.83455000 | -2.02354700 | 1.72038000  |
| H  | -0.47340200 | -1.72574200 | 3.42705200  |
| C  | 1.72834200  | -2.51514000 | 0.93933700  |
| Zn | 0.83879100  | 0.02062300  | 0.22366400  |
| C  | 5.74398800  | -0.67311800 | -0.39199200 |
| C  | 6.79416500  | 0.23072300  | -0.22375100 |
| C  | 6.55548200  | 1.61200700  | -0.14040700 |
| C  | 5.23776900  | 2.04148600  | -0.24261900 |
| C  | 4.17487800  | 1.14781300  | -0.43557800 |
| C  | 4.42087700  | -0.21279300 | -0.49491100 |
| N  | 4.74391400  | 3.35626900  | -0.14457300 |
| C  | 3.37020700  | 3.38204200  | -0.22053800 |
| C  | 2.86990500  | 1.92797300  | -0.49968100 |
| O  | 1.93242000  | 1.55539300  | 0.44269600  |
| O  | 2.68137100  | 4.38975700  | -0.11126700 |



|   |             |             |             |
|---|-------------|-------------|-------------|
| H | 5.94083400  | -1.73915000 | -0.44602600 |
| H | 7.81454300  | -0.13399700 | -0.14684100 |
| H | 7.37167900  | 2.31174200  | 0.00699300  |
| H | 3.60944400  | -0.91910900 | -0.61157500 |
| C | 5.56317300  | 4.52346100  | 0.10975300  |
| H | 6.28993800  | 4.66638400  | -0.69681800 |
| H | 4.89972200  | 5.38730900  | 0.16080500  |
| H | 6.10161300  | 4.41957800  | 1.05838500  |
| O | -1.97414900 | -0.51247800 | 0.11409600  |
| C | -7.95707900 | 0.25866400  | 2.70992500  |
| H | -8.11051000 | -0.60430700 | 3.36656900  |
| H | -8.26965900 | 1.15962300  | 3.24702800  |
| H | -8.63158900 | 0.13676300  | 1.85230100  |
| C | -0.99963800 | 5.23122500  | -2.42249000 |
| H | 0.06154300  | 5.48308500  | -2.33231000 |
| H | -1.21273500 | 5.00309800  | -3.47256800 |
| H | -1.57603900 | 6.12902100  | -2.16372100 |
| O | -3.83093000 | -0.60021000 | -1.48257300 |
| O | -1.97641500 | -1.92855200 | -1.77609200 |
| C | -2.96722000 | -2.39830300 | -2.73879700 |
| C | -3.60856300 | -3.65046100 | -2.13611400 |
| C | -2.25597000 | -2.73388700 | -4.04265400 |
| H | -4.12658200 | -3.41853500 | -1.20011400 |
| H | -4.32510700 | -4.10403100 | -2.82721200 |
| H | -2.82422100 | -4.38231500 | -1.92147700 |
| H | -1.67093500 | -1.88851800 | -4.41113400 |
| H | -1.57739600 | -3.57786300 | -3.88494100 |
| H | -2.98120800 | -3.01932500 | -4.81187700 |
| C | -3.95429800 | -1.17752800 | -2.81831000 |
| C | -3.50641900 | -0.10052500 | -3.80982500 |
| C | -5.41396600 | -1.54387900 | -3.04974600 |
| H | -2.46156100 | 0.18146400  | -3.64966500 |
| H | -3.62155900 | -0.44001700 | -4.84331300 |
| H | -4.12289700 | 0.79212800  | -3.66911700 |
| H | -5.79533000 | -2.19055800 | -2.25686200 |
| H | -6.02223300 | -0.63429100 | -3.07240100 |
| H | -5.53286900 | -2.05677400 | -4.00984000 |
| B | -2.59918900 | -0.97322700 | -1.00857000 |
| C | 2.27385900  | 1.95833600  | -1.95553500 |
| H | 1.52810700  | 2.75786300  | -1.97664600 |
| H | 3.07578200  | 2.20442400  | -2.66206800 |
| C | 1.64172300  | 0.65398500  | -2.31349800 |
| H | 2.30942400  | -0.18416400 | -2.50802300 |
| C | 0.31212500  | 0.44860100  | -2.34495200 |

|   |             |             |             |
|---|-------------|-------------|-------------|
| H | -0.38469700 | 1.26879300  | -2.18494200 |
| H | -0.10961000 | -0.52299400 | -2.58233000 |

**Int-IVD**

|   |             |             |             |
|---|-------------|-------------|-------------|
| C | 2.52818000  | 0.98537900  | 2.67511800  |
| C | 2.67967600  | 2.25263100  | 2.11017000  |
| C | 2.37899800  | 2.48969000  | 0.76044400  |
| C | 1.93100600  | 1.41379200  | 0.00606500  |
| C | 1.79401000  | 0.12995400  | 0.55560300  |
| C | 2.08033700  | -0.09071300 | 1.89228300  |
| N | 1.52632000  | 1.40929800  | -1.34139000 |
| C | 1.03756800  | 0.17898600  | -1.70640900 |
| C | 1.30939800  | -0.80300900 | -0.52895600 |
| O | 0.14267100  | -1.54792600 | -0.19015200 |
| O | 0.51953600  | -0.11128800 | -2.77384100 |
| H | 2.75552200  | 0.83001400  | 3.72508000  |
| H | 3.02939300  | 3.07706400  | 2.72452300  |
| H | 2.48275300  | 3.48037800  | 0.33096600  |
| H | 1.94815200  | -1.07581900 | 2.32825700  |
| C | 1.39780600  | 2.59684900  | -2.16186000 |
| H | 2.36873700  | 3.08612600  | -2.28354600 |
| H | 1.02065200  | 2.28551200  | -3.13623600 |
| H | 0.69407000  | 3.30286500  | -1.70668300 |
| O | -2.20975900 | -1.58093000 | 0.19431700  |
| O | -1.17379400 | 0.47210200  | 0.01609400  |
| C | -2.60748000 | 0.73752400  | -0.04654100 |
| C | -2.95323700 | 0.92837200  | -1.52515900 |
| C | -2.89928800 | 2.00722700  | 0.74084200  |
| H | -2.74578000 | 0.02163600  | -2.10128500 |
| H | -4.00565900 | 1.19562200  | -1.65805600 |
| H | -2.33606000 | 1.73559700  | -1.93050900 |
| H | -2.51483600 | 1.94464200  | 1.76092700  |
| H | -2.42539200 | 2.86177600  | 0.24776700  |
| H | -3.97756500 | 2.19323900  | 0.78222000  |
| C | -3.20823800 | -0.58008400 | 0.56803800  |
| C | -3.25952500 | -0.55711800 | 2.09731800  |
| C | -4.55389500 | -0.99748800 | -0.00880300 |
| H | -2.29767900 | -0.25086400 | 2.52047900  |
| H | -4.03310700 | 0.12579300  | 2.46073700  |
| H | -3.48901300 | -1.56326200 | 2.46037100  |
| H | -4.49324800 | -1.16791800 | -1.08573200 |
| H | -4.88865500 | -1.92421400 | 0.46752700  |
| H | -5.30719900 | -0.22599300 | 0.18220100  |
| B | -1.03866900 | -0.89469900 | 0.00385500  |

|   |            |             |             |
|---|------------|-------------|-------------|
| C | 2.37066200 | -1.82055700 | -1.00578100 |
| H | 1.93577800 | -2.34591200 | -1.86289900 |
| H | 3.23821200 | -1.25368400 | -1.36636700 |
| C | 2.79080700 | -2.79227900 | 0.05935600  |
| H | 3.43985300 | -2.39974200 | 0.84052200  |
| C | 2.41277200 | -4.07019300 | 0.09760600  |
| H | 1.76439300 | -4.49425300 | -0.66613300 |
| H | 2.73921400 | -4.73965100 | 0.88896700  |

**(R)-3aa**

|   |             |             |             |
|---|-------------|-------------|-------------|
| C | 1.38514500  | -2.78233000 | 0.18280600  |
| C | 2.59056700  | -2.13317800 | -0.08799900 |
| C | 2.65238500  | -0.73749200 | -0.21249000 |
| C | 1.46755500  | -0.02882000 | -0.06175200 |
| C | 0.24377000  | -0.66671200 | 0.19154600  |
| C | 0.19870200  | -2.04520000 | 0.32526800  |
| N | 1.28196900  | 1.36566600  | -0.11165600 |
| C | -0.02646600 | 1.70594700  | 0.13538100  |
| C | -0.84010100 | 0.39090400  | 0.27259700  |
| O | -0.47803700 | 2.83917300  | 0.19573700  |
| H | 1.36331100  | -3.86281400 | 0.28505900  |
| H | 3.50162200  | -2.71365600 | -0.19950200 |
| H | 3.59319300  | -0.23586000 | -0.41241000 |
| H | -0.73693500 | -2.55061900 | 0.54411600  |
| C | 2.34162700  | 2.33117600  | -0.32373700 |
| H | 2.81052500  | 2.17761700  | -1.30101900 |
| H | 1.89464100  | 3.32486800  | -0.28538500 |
| H | 3.10490500  | 2.24311700  | 0.45660900  |
| C | -1.84831600 | 0.33920200  | -0.90955000 |
| H | -2.43578500 | 1.26217400  | -0.85652700 |
| H | -1.28925000 | 0.34253900  | -1.85179600 |
| C | -2.73930200 | -0.86610600 | -0.81832700 |
| H | -2.32854800 | -1.80664200 | -1.18108700 |
| C | -3.95727400 | -0.84901300 | -0.26674900 |
| H | -4.40479000 | 0.07477700  | 0.09475000  |
| H | -4.55924700 | -1.74941500 | -0.18229400 |
| O | -1.52712700 | 0.43503200  | 1.51227900  |
| H | -2.25587000 | -0.20964700 | 1.44498500  |

**Int-III**

|   |            |             |             |
|---|------------|-------------|-------------|
| N | 0.11413600 | -1.10031300 | -1.84984400 |
| C | 1.60741400 | -1.24198000 | -1.96904700 |
| H | 1.84998700 | -2.23254300 | -1.58977000 |
| C | 1.89888500 | -1.14788700 | -3.48024400 |

|   |             |             |             |
|---|-------------|-------------|-------------|
| H | 1.93303000  | -2.15738100 | -3.89761700 |
| H | 2.87428900  | -0.70411500 | -3.67992300 |
| C | 0.71859300  | -0.34714700 | -4.08382600 |
| H | 0.23716400  | -0.91269400 | -4.88636000 |
| H | 1.04470200  | 0.60582700  | -4.50594100 |
| C | -0.24778200 | -0.10069800 | -2.90667200 |
| H | -1.30013400 | -0.22775400 | -3.16118400 |
| H | -0.12362300 | 0.89439500  | -2.49051800 |
| C | 2.40722400  | -0.26719300 | -1.04696400 |
| C | 3.89301500  | -0.67091000 | -1.06011800 |
| C | 4.93475100  | 0.23524700  | -1.27397000 |
| C | 4.23588800  | -1.99036300 | -0.71895600 |
| C | 6.26784100  | -0.16709700 | -1.17966900 |
| H | 4.71670300  | 1.27352900  | -1.48653100 |
| C | 5.56606100  | -2.38703100 | -0.61911200 |
| H | 3.46176100  | -2.71505200 | -0.48961300 |
| C | 6.61120400  | -1.48304500 | -0.85620200 |
| H | 7.05406800  | 0.56491300  | -1.34599500 |
| H | 5.79605000  | -3.41371600 | -0.34563100 |
| C | 2.16020900  | 1.21340900  | -1.34780400 |
| C | 1.45873500  | 2.03031000  | -0.45285500 |
| C | 2.59390700  | 1.79713500  | -2.54784300 |
| C | 1.16429100  | 3.35490900  | -0.76242700 |
| H | 1.09832700  | 1.62964300  | 0.48230800  |
| C | 2.29439100  | 3.12424500  | -2.85584900 |
| H | 3.17362300  | 1.22539300  | -3.26107800 |
| C | 1.56133400  | 3.92658800  | -1.97551300 |
| H | 0.58538300  | 3.94365700  | -0.05779900 |
| H | 2.63524500  | 3.53691900  | -3.80200300 |
| C | -1.96381100 | -2.57183800 | -1.99873000 |
| C | -2.86404000 | -2.72091300 | -3.04980400 |
| C | -3.74215100 | -3.12369200 | -0.43015100 |
| C | -4.20660000 | -3.03812400 | -2.81296500 |
| H | -2.50532400 | -2.61261100 | -4.07137900 |
| C | -4.62594200 | -3.26971600 | -1.50521100 |
| H | -4.90247900 | -3.14462100 | -3.63854100 |
| H | -5.64840700 | -3.57408800 | -1.30964800 |
| C | -4.16678300 | -3.51638100 | 0.94915400  |
| O | -1.57138000 | -2.46267500 | 0.34062200  |
| F | -3.46704200 | -4.58620900 | 1.40957000  |
| F | -4.00105000 | -2.54283400 | 1.88811900  |
| F | -5.47754800 | -3.86207100 | 1.00380000  |
| C | -0.48599600 | -2.43857200 | -2.22109500 |
| H | 0.02297600  | -3.17674700 | -1.59493600 |

|    |             |             |             |
|----|-------------|-------------|-------------|
| H  | -0.24964400 | -2.66230300 | -3.26637100 |
| C  | -2.40200100 | -2.70428600 | -0.65016300 |
| Zn | -0.59848000 | -0.72813100 | 0.15069100  |
| C  | -5.57806900 | 0.34176100  | 1.71364900  |
| C  | -6.21874400 | 1.57047000  | 1.91731200  |
| C  | -5.72527700 | 2.77126300  | 1.37745200  |
| C  | -4.56458800 | 2.69966300  | 0.62164600  |
| C  | -3.91502600 | 1.46481900  | 0.41315000  |
| C  | -4.40944400 | 0.28421100  | 0.95071600  |
| N  | -3.86387100 | 3.73768400  | -0.01657200 |
| C  | -2.74303600 | 3.25459900  | -0.66094800 |
| C  | -2.73872000 | 1.71897100  | -0.39650100 |
| O  | -1.92567400 | 0.94103600  | -0.88348800 |
| O  | -1.95501000 | 3.89033800  | -1.33842800 |
| H  | -5.98268700 | -0.56590900 | 2.14821800  |
| H  | -7.12666900 | 1.60421800  | 2.51219100  |
| H  | -6.23759000 | 3.71080500  | 1.55160200  |
| H  | -3.88397100 | -0.64561500 | 0.78571700  |
| C  | -4.25007600 | 5.13493900  | 0.00506600  |
| H  | -4.24511200 | 5.51974300  | 1.03012000  |
| H  | -3.52360500 | 5.68563700  | -0.59331100 |
| H  | -5.24884300 | 5.26483700  | -0.42352300 |
| O  | 1.88680500  | -0.62394000 | 0.25957900  |
| C  | 8.05177000  | -1.92183200 | -0.77165500 |
| H  | 8.72218200  | -1.06640700 | -0.64395200 |
| H  | 8.20987900  | -2.61135000 | 0.06457000  |
| H  | 8.35723500  | -2.44728600 | -1.68580900 |
| C  | 1.19346000  | 5.34946100  | -2.31180900 |
| H  | 1.49920000  | 5.61326200  | -3.32888400 |
| H  | 0.11017900  | 5.49192500  | -2.22733700 |
| H  | 1.66906500  | 6.05853300  | -1.62271300 |
| C  | -0.61697200 | 0.25513300  | 1.89361800  |
| H  | -0.20511300 | -0.30519900 | 2.73385700  |
| C  | -1.01640400 | 1.47342100  | 2.07322600  |
| O  | 3.45961600  | 0.68585000  | 1.57740300  |
| O  | 2.26091500  | -1.01128000 | 2.57309700  |
| C  | 3.25424700  | -0.58206400 | 3.55560000  |
| C  | 4.39537800  | -1.60084200 | 3.49199700  |
| C  | 2.60634900  | -0.57824000 | 4.93294000  |
| H  | 4.86043300  | -1.61168000 | 2.50093400  |
| H  | 5.16538800  | -1.38522500 | 4.23866700  |
| H  | 3.99169300  | -2.59820800 | 3.69072000  |
| H  | 1.69902700  | 0.02948300  | 4.94659000  |
| H  | 2.33974600  | -1.60069300 | 5.21817200  |

|                |             |             |             |
|----------------|-------------|-------------|-------------|
| H              | 3.30231500  | -0.18662600 | 5.68225300  |
| C              | 3.66568700  | 0.83575900  | 3.01496500  |
| C              | 2.72609000  | 1.95414300  | 3.47429600  |
| C              | 5.12010700  | 1.21761700  | 3.25401000  |
| H              | 1.67849300  | 1.69011100  | 3.29953100  |
| H              | 2.86097000  | 2.17742300  | 4.53688800  |
| H              | 2.94835200  | 2.85845400  | 2.89969300  |
| H              | 5.80185600  | 0.50884200  | 2.77903500  |
| H              | 5.31257900  | 2.21042500  | 2.83543600  |
| H              | 5.33779000  | 1.25245700  | 4.32667100  |
| B              | 2.53622700  | -0.31113700 | 1.42746900  |
| C              | -1.43394300 | 2.72557900  | 2.16241200  |
| H              | -2.45658700 | 2.96688100  | 2.43992400  |
| H              | -0.74848200 | 3.56112200  | 2.03578000  |
| <b>Int-III</b> |             |             |             |
| N              | 0.13555600  | -1.07124600 | -1.87174600 |
| C              | 1.62590500  | -1.05557200 | -2.05982000 |
| H              | 1.97399800  | -2.05715400 | -1.81592600 |
| C              | 1.83147400  | -0.75498400 | -3.55773000 |
| H              | 1.90918300  | -1.70148700 | -4.09866500 |
| H              | 2.76344500  | -0.22219500 | -3.74589500 |
| C              | 0.56861000  | 0.02417900  | -4.00203000 |
| H              | 0.10553300  | -0.45419700 | -4.86959600 |
| H              | 0.80320600  | 1.05329500  | -4.28206400 |
| C              | -0.37257200 | 0.00914500  | -2.77743900 |
| H              | -1.41302300 | -0.20414500 | -3.02027600 |
| H              | -0.35137900 | 0.95390200  | -2.24121800 |
| C              | 2.38096700  | -0.12475700 | -1.05851000 |
| C              | 3.88853500  | -0.42927700 | -1.13715600 |
| C              | 4.86825900  | 0.55363700  | -1.29781700 |
| C              | 4.31895300  | -1.74877300 | -0.91615400 |
| C              | 6.22492300  | 0.22719700  | -1.26972300 |
| H              | 4.58433000  | 1.59094000  | -1.41528800 |
| C              | 5.67247800  | -2.06999900 | -0.88088200 |
| H              | 3.59585600  | -2.53615200 | -0.73053500 |
| C              | 6.65499800  | -1.08721600 | -1.06603100 |
| H              | 6.96113500  | 1.01753900  | -1.39234100 |
| H              | 5.97045100  | -3.09959800 | -0.69956500 |
| C              | 2.03289200  | 1.35814900  | -1.20235400 |
| C              | 1.30563800  | 2.03030700  | -0.21548700 |
| C              | 2.41012200  | 2.09557100  | -2.33616200 |
| C              | 0.94402900  | 3.36569500  | -0.36388300 |
| H              | 0.97981500  | 1.51643700  | 0.67555100  |
| C              | 2.04184800  | 3.43175800  | -2.48471200 |

|    |             |             |             |
|----|-------------|-------------|-------------|
| H  | 3.00704000  | 1.64111900  | -3.11608000 |
| C  | 1.28974900  | 4.09109700  | -1.50639600 |
| H  | 0.35740500  | 3.83447700  | 0.42014300  |
| H  | 2.34582600  | 3.96668500  | -3.38094300 |
| C  | -1.80604400 | -2.67832800 | -2.11889200 |
| C  | -2.75126200 | -2.75468500 | -3.13684400 |
| C  | -3.53125000 | -3.25879500 | -0.50657100 |
| C  | -4.08603900 | -3.07576600 | -2.86228700 |
| H  | -2.43858600 | -2.56935600 | -4.16262100 |
| C  | -4.46379600 | -3.33221200 | -1.54608000 |
| H  | -4.81582700 | -3.13333500 | -3.66326100 |
| H  | -5.49284400 | -3.58767800 | -1.31648500 |
| C  | -3.94087500 | -3.52543800 | 0.90269500  |
| O  | -1.28831900 | -2.79314500 | 0.19352600  |
| F  | -3.25843400 | -4.55000000 | 1.47052200  |
| F  | -3.74584400 | -2.45184000 | 1.72993900  |
| F  | -5.25755400 | -3.83511100 | 1.00978700  |
| C  | -0.35559100 | -2.41309700 | -2.37938500 |
| H  | 0.24275400  | -3.16608500 | -1.85953200 |
| H  | -0.14630400 | -2.48971400 | -3.45115600 |
| C  | -2.17877900 | -2.91542400 | -0.76623900 |
| Zn | -0.51682300 | -0.94189700 | 0.16965600  |
| C  | -6.04416100 | 1.11781700  | 2.08035900  |
| C  | -6.30011400 | 2.49443900  | 2.05414100  |
| C  | -5.52926500 | 3.38005600  | 1.28464400  |
| C  | -4.49237400 | 2.83890100  | 0.53912500  |
| C  | -4.22412300 | 1.45301300  | 0.56028900  |
| C  | -4.99461700 | 0.58387100  | 1.32744200  |
| N  | -3.58567300 | 3.50821500  | -0.30003900 |
| C  | -2.69772200 | 2.62194400  | -0.87248000 |
| C  | -3.07466800 | 1.22169300  | -0.30502400 |
| O  | -2.51458100 | 0.17954400  | -0.61946300 |
| O  | -1.83467000 | 2.87854300  | -1.69333600 |
| H  | -6.66274400 | 0.46658100  | 2.68897800  |
| H  | -7.11835700 | 2.89456800  | 2.64545800  |
| H  | -5.74186400 | 4.44324500  | 1.27932000  |
| H  | -4.76922800 | -0.47622700 | 1.34162300  |
| C  | -3.58161500 | 4.93668900  | -0.54548100 |
| H  | -3.39713300 | 5.48671100  | 0.38328500  |
| H  | -2.78113600 | 5.14591000  | -1.25580600 |
| H  | -4.53802300 | 5.25849400  | -0.96981800 |
| O  | 1.91663600  | -0.63492700 | 0.22090100  |
| C  | 8.12086300  | -1.44214700 | -1.05227600 |
| H  | 8.43327100  | -1.86107900 | -2.01769000 |

|   |             |             |             |
|---|-------------|-------------|-------------|
| H | 8.74238700  | -0.56249300 | -0.85867500 |
| H | 8.34129600  | -2.19481700 | -0.28771800 |
| C | 0.82120100  | 5.51099500  | -1.69459200 |
| H | 1.42701500  | 6.04305600  | -2.43485700 |
| H | -0.21914300 | 5.52156300  | -2.04497500 |
| H | 0.85262200  | 6.07243900  | -0.75454900 |
| C | -0.87217800 | -0.12032700 | 1.98587000  |
| H | 0.00270100  | -0.37364000 | 2.59244800  |
| C | -1.16300600 | 1.28223700  | 2.03054800  |
| O | 3.48062400  | 0.61709500  | 1.60819300  |
| O | 2.28900100  | -1.13629100 | 2.50910900  |
| C | 3.26967100  | -0.74530900 | 3.52176600  |
| C | 4.42366900  | -1.74550800 | 3.41670200  |
| C | 2.60939300  | -0.81878300 | 4.89105700  |
| H | 4.89789200  | -1.69933400 | 2.43095400  |
| H | 5.18418700  | -1.55837400 | 4.18050700  |
| H | 4.03111500  | -2.75654900 | 3.56063000  |
| H | 1.69491800  | -0.22289600 | 4.92743200  |
| H | 2.35211000  | -1.85737100 | 5.12103000  |
| H | 3.29415400  | -0.45828700 | 5.66579800  |
| C | 3.66689000  | 0.70181700  | 3.05441900  |
| C | 2.70715500  | 1.78531100  | 3.55403900  |
| C | 5.11241400  | 1.09207600  | 3.32978500  |
| H | 1.66295700  | 1.52011000  | 3.35980800  |
| H | 2.82859900  | 1.96082300  | 4.62704400  |
| H | 2.92174800  | 2.71777000  | 3.02352800  |
| H | 5.80990700  | 0.41614300  | 2.83064900  |
| H | 5.29554800  | 2.10616200  | 2.96118000  |
| H | 5.31625900  | 1.07878300  | 4.40552400  |
| B | 2.56986900  | -0.37992800 | 1.40055300  |
| C | -1.43455400 | 2.46889700  | 2.02054800  |
| H | -1.72501100 | -0.70562600 | 2.34860400  |
| H | -1.68114100 | 3.50423900  | 2.07245100  |

**TS-E**

|   |             |             |             |
|---|-------------|-------------|-------------|
| N | 0.05422300  | -0.69188100 | -1.91230600 |
| C | 1.53214900  | -0.60594800 | -2.15360900 |
| H | 1.90961300  | -1.62470600 | -2.09320200 |
| C | 1.67395400  | -0.06620400 | -3.59323100 |
| H | 1.78824800  | -0.91197200 | -4.27609300 |
| H | 2.57075200  | 0.54165100  | -3.71519700 |
| C | 0.35836900  | 0.69545300  | -3.88807000 |
| H | -0.12250200 | 0.29939000  | -4.78684100 |
| H | 0.52963000  | 1.76173700  | -4.05394300 |



|    |             |             |             |
|----|-------------|-------------|-------------|
| C  | -0.52009200 | 0.48645500  | -2.63758300 |
| H  | -1.56702800 | 0.28059200  | -2.86021600 |
| H  | -0.48778600 | 1.34775400  | -1.97441000 |
| C  | 2.32610000  | 0.14741300  | -1.04067100 |
| C  | 3.82828800  | -0.06266300 | -1.31350400 |
| C  | 4.74528800  | 0.98187100  | -1.44395800 |
| C  | 4.32480800  | -1.37704200 | -1.34614600 |
| C  | 6.10670900  | 0.72388600  | -1.61548100 |
| H  | 4.41232900  | 2.00982600  | -1.38320000 |
| C  | 5.68302600  | -1.63064600 | -1.50857700 |
| H  | 3.65344300  | -2.21823800 | -1.20599100 |
| C  | 6.60308500  | -0.58216200 | -1.65185600 |
| H  | 6.79557700  | 1.55993100  | -1.70598700 |
| H  | 6.03525700  | -2.65907500 | -1.51813400 |
| C  | 1.93643300  | 1.61342400  | -0.83297900 |
| C  | 1.42745500  | 2.06517300  | 0.38951100  |
| C  | 2.10532600  | 2.57003600  | -1.84713000 |
| C  | 1.07551900  | 3.39781300  | 0.58444400  |
| H  | 1.28092400  | 1.37596500  | 1.20637800  |
| C  | 1.75261900  | 3.90308200  | -1.65003900 |
| H  | 2.53210900  | 2.29151800  | -2.80135800 |
| C  | 1.21811500  | 4.34200700  | -0.43382500 |
| H  | 0.65936300  | 3.69584300  | 1.54290700  |
| H  | 1.89396300  | 4.61209400  | -2.46194200 |
| C  | -1.86121500 | -2.31342100 | -2.32472700 |
| C  | -2.80342700 | -2.31245600 | -3.34932600 |
| C  | -3.55777100 | -3.16770500 | -0.80532800 |
| C  | -4.12130100 | -2.72606500 | -3.12340000 |
| H  | -2.49911300 | -1.99481900 | -4.34464600 |
| C  | -4.48541300 | -3.16211000 | -1.85144400 |
| H  | -4.84714400 | -2.72091600 | -3.92992600 |
| H  | -5.49918300 | -3.49810700 | -1.66147300 |
| C  | -3.94724600 | -3.64624100 | 0.55344700  |
| O  | -1.34933400 | -2.67095400 | -0.02962400 |
| F  | -3.21919900 | -4.71388500 | 0.96586500  |
| F  | -3.78896800 | -2.69673800 | 1.52422300  |
| F  | -5.24913800 | -4.02280500 | 0.61573600  |
| C  | -0.41985300 | -1.97610500 | -2.56296200 |
| H  | 0.20237400  | -2.76857200 | -2.13809500 |
| H  | -0.22167600 | -1.92727500 | -3.63896700 |
| C  | -2.22635300 | -2.72283800 | -1.01140300 |
| Zn | -0.62683200 | -0.82182100 | 0.10845100  |
| C  | -6.40271000 | 0.71914600  | 1.70728400  |
| C  | -6.80126600 | 2.05959600  | 1.67059800  |

|   |             |             |             |
|---|-------------|-------------|-------------|
| C | -5.95505900 | 3.06465200  | 1.17702400  |
| C | -4.69997900 | 2.67944400  | 0.72446100  |
| C | -4.28382700 | 1.33316400  | 0.77125200  |
| C | -5.13065500 | 0.34509900  | 1.25539200  |
| N | -3.69146000 | 3.48134500  | 0.16600800  |
| C | -2.60886900 | 2.71673200  | -0.23634000 |
| C | -2.91285600 | 1.27444500  | 0.22189600  |
| O | -2.35009000 | 0.26660700  | -0.27442000 |
| O | -1.64932900 | 3.11450100  | -0.87789100 |
| H | -7.08364500 | -0.03494200 | 2.08946500  |
| H | -7.78980700 | 2.33440000  | 2.02669000  |
| H | -6.27769600 | 4.09977800  | 1.14506300  |
| H | -4.80308900 | -0.68773700 | 1.28496000  |
| C | -3.81341300 | 4.90195800  | -0.09075800 |
| H | -3.93205400 | 5.45622000  | 0.84603700  |
| H | -2.90018100 | 5.22529700  | -0.59161700 |
| H | -4.67302900 | 5.10640000  | -0.73817500 |
| O | 1.98218800  | -0.62834400 | 0.13763900  |
| C | 8.07249300  | -0.86130700 | -1.84722400 |
| H | 8.28163900  | -1.16720600 | -2.88048500 |
| H | 8.67819700  | 0.02527200  | -1.63636900 |
| H | 8.41320200  | -1.67349900 | -1.19584800 |
| C | 0.76031400  | 5.76491200  | -0.24610100 |
| H | 1.28101300  | 6.45060700  | -0.92220200 |
| H | -0.31426300 | 5.84389600  | -0.45573300 |
| H | 0.91811100  | 6.10687000  | 0.78225900  |
| C | -0.54503500 | -0.41125400 | 2.20673100  |
| H | 0.52870700  | -0.37286200 | 2.37369900  |
| C | -1.25951000 | 0.76139300  | 2.35741700  |
| O | 3.77335500  | 0.21577900  | 1.56167800  |
| O | 2.56250300  | -1.63530200 | 2.20234100  |
| C | 3.68407800  | -1.53825700 | 3.13768800  |
| C | 4.73004400  | -2.55138500 | 2.66601600  |
| C | 3.18437600  | -1.88407200 | 4.53317900  |
| H | 5.09015800  | -2.30905300 | 1.66096900  |
| H | 5.58650100  | -2.58516200 | 3.34580600  |
| H | 4.27333700  | -3.54507500 | 2.63612500  |
| H | 2.33156500  | -1.26476300 | 4.81922900  |
| H | 2.87269500  | -2.93268500 | 4.56385000  |
| H | 3.98190500  | -1.74448600 | 5.27046600  |
| C | 4.14507200  | -0.04684000 | 2.94855800  |
| C | 3.35711600  | 0.94494600  | 3.80809500  |
| C | 5.64271900  | 0.18772000  | 3.09342600  |
| H | 2.27803100  | 0.78187400  | 3.72206500  |

|   |             |             |            |
|---|-------------|-------------|------------|
| H | 3.63502300  | 0.86661500  | 4.86323400 |
| H | 3.57504000  | 1.96070600  | 3.46542200 |
| H | 6.20934200  | -0.39215100 | 2.36189300 |
| H | 5.86449100  | 1.24766600  | 2.93492300 |
| H | 5.98026600  | -0.08430700 | 4.09887700 |
| B | 2.77942500  | -0.66979700 | 1.25168100 |
| C | -2.01560200 | 1.73975800  | 2.20429700 |
| H | -1.00034800 | -1.30672200 | 2.63517600 |
| H | -2.50639600 | 2.57317300  | 2.66625500 |

**Int-IVE**

|   |             |             |             |
|---|-------------|-------------|-------------|
| N | 0.06441700  | -0.63553800 | -1.96828700 |
| C | 1.54294100  | -0.54291100 | -2.17657800 |
| H | 1.92085300  | -1.56221300 | -2.13436300 |
| C | 1.71062600  | 0.03034800  | -3.60118700 |
| H | 1.83914900  | -0.80089900 | -4.29925600 |
| H | 2.60828600  | 0.64216700  | -3.69387800 |
| C | 0.39876300  | 0.79492800  | -3.90587800 |
| H | -0.06071400 | 0.41841700  | -4.82401100 |
| H | 0.56962100  | 1.86530500  | -4.04343500 |
| C | -0.50571500 | 0.55280400  | -2.68101900 |
| H | -1.54535800 | 0.34123800  | -2.92973200 |
| H | -0.49939600 | 1.39812600  | -1.99555600 |
| C | 2.31595100  | 0.18163700  | -1.03017100 |
| C | 3.82079600  | -0.02068600 | -1.29809300 |
| C | 4.73537300  | 1.02903900  | -1.40879800 |
| C | 4.31965200  | -1.33229000 | -1.36332900 |
| C | 6.09574800  | 0.77817700  | -1.59352900 |
| H | 4.39988600  | 2.05446700  | -1.32327400 |
| C | 5.67815400  | -1.57916600 | -1.53926500 |
| H | 3.65115600  | -2.17841900 | -1.23967800 |
| C | 6.59472400  | -0.52630800 | -1.66456500 |
| H | 6.78232100  | 1.61773800  | -1.66807200 |
| H | 6.03230500  | -2.60627000 | -1.57427700 |
| C | 1.92466700  | 1.64067800  | -0.78402200 |
| C | 1.42719500  | 2.06116700  | 0.45469500  |
| C | 2.08975600  | 2.62357000  | -1.77315500 |
| C | 1.08257900  | 3.38933400  | 0.68793400  |
| H | 1.28415500  | 1.34980100  | 1.25437500  |
| C | 1.74322500  | 3.95193600  | -1.53776000 |
| H | 2.50913700  | 2.36948700  | -2.73727500 |
| C | 1.21950300  | 4.35966900  | -0.30624400 |
| H | 0.67763500  | 3.66544400  | 1.65805900  |
| H | 1.88018200  | 4.68204100  | -2.33147700 |

|    |             |             |             |
|----|-------------|-------------|-------------|
| C  | -1.84438000 | -2.26366700 | -2.37998100 |
| C  | -2.78860700 | -2.24827500 | -3.40375500 |
| C  | -3.53944500 | -3.14233600 | -0.87261100 |
| C  | -4.10516800 | -2.66543500 | -3.18295900 |
| H  | -2.48509300 | -1.91633900 | -4.39444100 |
| C  | -4.46713300 | -3.12384600 | -1.91839000 |
| H  | -4.83177600 | -2.64866400 | -3.98856900 |
| H  | -5.47938900 | -3.46655900 | -1.73347300 |
| C  | -3.92883700 | -3.65345500 | 0.47540600  |
| O  | -1.33564800 | -2.63507100 | -0.07976900 |
| F  | -3.20589100 | -4.73837500 | 0.85189500  |
| F  | -3.75989900 | -2.73517800 | 1.47137100  |
| F  | -5.23237300 | -4.02480800 | 0.52917400  |
| C  | -0.40419400 | -1.91687000 | -2.62561100 |
| H  | 0.22457600  | -2.70882400 | -2.21013800 |
| H  | -0.21325000 | -1.85918700 | -3.70279100 |
| C  | -2.21114800 | -2.68840300 | -1.07152500 |
| Zn | -0.74342700 | -0.74959400 | -0.02124300 |
| C  | -6.38406500 | 0.67600800  | 1.71448100  |
| C  | -6.84341900 | 1.98990600  | 1.60345600  |
| C  | -6.00508400 | 3.01744300  | 1.14327200  |
| C  | -4.69960600 | 2.67656900  | 0.80873200  |
| C  | -4.22011700 | 1.36519900  | 0.94011800  |
| C  | -5.05470500 | 0.35748500  | 1.38943900  |
| N  | -3.69288200 | 3.50658500  | 0.27814900  |
| C  | -2.56947400 | 2.77212600  | -0.05424500 |
| C  | -2.72751300 | 1.34617000  | 0.59052000  |
| O  | -2.31640300 | 0.33500800  | -0.22014000 |
| O  | -1.63838500 | 3.17857900  | -0.72956600 |
| H  | -7.05627300 | -0.10374200 | 2.06027900  |
| H  | -7.86983100 | 2.22533800  | 1.86707900  |
| H  | -6.36972700 | 4.03411800  | 1.04594000  |
| H  | -4.68671500 | -0.65824700 | 1.47956500  |
| C  | -3.90434100 | 4.88019200  | -0.13210300 |
| H  | -4.08259300 | 5.52344800  | 0.73999400  |
| H  | -3.00279500 | 5.21108400  | -0.65520000 |
| H  | -4.76552300 | 4.95217500  | -0.81101900 |
| O  | 1.95815400  | -0.62368100 | 0.12754000  |
| C  | 8.06290400  | -0.79394200 | -1.88425100 |
| H  | 8.28488500  | -0.90856100 | -2.95609100 |
| H  | 8.67901800  | 0.03190700  | -1.50777600 |
| H  | 8.37889000  | -1.71870700 | -1.38501900 |
| C  | 0.76245900  | 5.77692300  | -0.07900600 |
| H  | 1.28781900  | 6.48211600  | -0.73085100 |

|   |             |             |             |
|---|-------------|-------------|-------------|
| H | -0.31079200 | 5.86197400  | -0.29248600 |
| H | 0.91431200  | 6.08770800  | 0.96005800  |
| C | -0.50792900 | -0.63576500 | 2.61230500  |
| H | 0.57233300  | -0.66532100 | 2.55191900  |
| C | -1.22949000 | 0.42807000  | 2.32983500  |
| O | 3.76467800  | 0.17477800  | 1.56118500  |
| O | 2.55359800  | -1.68873900 | 2.16036500  |
| C | 3.68476900  | -1.62188200 | 3.08890300  |
| C | 4.72110900  | -2.62625100 | 2.57933000  |
| C | 3.19547800  | -2.00474500 | 4.47832900  |
| H | 5.07436100  | -2.35694400 | 1.57876600  |
| H | 5.58281800  | -2.68394800 | 3.25068800  |
| H | 4.25876200  | -3.61623900 | 2.52452500  |
| H | 2.34923900  | -1.38946800 | 4.79133500  |
| H | 2.87866800  | -3.05220600 | 4.48200000  |
| H | 4.00084700  | -1.89041400 | 5.21137100  |
| C | 4.15023500  | -0.12788100 | 2.93615200  |
| C | 3.37740500  | 0.84376300  | 3.83144000  |
| C | 5.65072900  | 0.09521800  | 3.07063700  |
| H | 2.29647600  | 0.68958800  | 3.75395200  |
| H | 3.66717400  | 0.73474900  | 4.88062500  |
| H | 3.59716200  | 1.86730700  | 3.51429900  |
| H | 6.20495700  | -0.46184900 | 2.31231500  |
| H | 5.87592200  | 1.15884600  | 2.94554600  |
| H | 5.99954000  | -0.21290400 | 4.06166600  |
| B | 2.76609300  | -0.69841500 | 1.23332500  |
| C | -2.02900200 | 1.39044200  | 1.97136300  |
| H | -0.97979100 | -1.52605000 | 3.03023000  |
| H | -2.28852900 | 2.20007800  | 2.65038400  |

**Int-VE**

|   |             |             |             |
|---|-------------|-------------|-------------|
| C | -2.59724300 | -1.64366300 | 2.47405400  |
| C | -2.77166600 | -2.70103400 | 1.57882500  |
| C | -2.49048500 | -2.55628800 | 0.21190400  |
| C | -2.02827000 | -1.31963100 | -0.21827400 |
| C | -1.85058400 | -0.25203900 | 0.67167300  |
| C | -2.13673000 | -0.39908600 | 2.01691000  |
| N | -1.65957500 | -0.93358400 | -1.52062700 |
| C | -1.15349900 | 0.34248700  | -1.53785600 |
| C | -1.35697900 | 0.94941100  | -0.10565000 |
| O | -0.15041000 | 1.51773200  | 0.38183300  |
| O | -0.64521300 | 0.91260800  | -2.48862800 |
| H | -2.82059600 | -1.78373800 | 3.52697600  |
| H | -3.13181800 | -3.65867900 | 1.94297100  |

|                |             |             |             |
|----------------|-------------|-------------|-------------|
| H              | -2.62423300 | -3.38405200 | -0.47613200 |
| H              | -1.99875400 | 0.43214100  | 2.70220800  |
| C              | -1.55728700 | -1.84507400 | -2.64302400 |
| H              | -2.52860000 | -2.30165900 | -2.85397700 |
| H              | -1.22814000 | -1.26934300 | -3.50815200 |
| H              | -0.82678600 | -2.63397200 | -2.43044500 |
| C              | -1.95644800 | 4.55100200  | 0.36771000  |
| H              | -1.64579400 | 5.25599800  | -0.40123800 |
| C              | -2.17649800 | 3.29384000  | 0.09231000  |
| O              | 1.07950200  | -0.51521700 | -0.07793500 |
| O              | 2.21604600  | 1.36571300  | 0.62168200  |
| C              | 3.18683200  | 0.27117200  | 0.62439700  |
| C              | 3.31883300  | -0.19843500 | 2.07464700  |
| C              | 4.51682300  | 0.80143200  | 0.10725600  |
| H              | 2.36824700  | -0.58800300 | 2.45224700  |
| H              | 4.07908900  | -0.97889100 | 2.17348400  |
| H              | 3.61321500  | 0.65098000  | 2.69800800  |
| H              | 4.40581500  | 1.28047800  | -0.86773600 |
| H              | 4.91847000  | 1.53901000  | 0.80892800  |
| H              | 5.24352000  | -0.01280300 | 0.01718100  |
| C              | 2.49469900  | -0.79237000 | -0.30587100 |
| C              | 2.75231000  | -0.55345000 | -1.79538000 |
| C              | 2.76764100  | -2.24440300 | 0.06026600  |
| H              | 2.55098500  | 0.48596300  | -2.07113000 |
| H              | 3.78432000  | -0.79527700 | -2.06575500 |
| H              | 2.08196200  | -1.19328900 | -2.37673000 |
| H              | 2.44110900  | -2.47059000 | 1.07733500  |
| H              | 2.22852300  | -2.90345600 | -0.62743400 |
| H              | 3.83655100  | -2.46660400 | -0.02350400 |
| B              | 1.00864900  | 0.79923700  | 0.31090400  |
| C              | -2.41083300 | 2.03588500  | -0.17553100 |
| H              | -2.07057200 | 4.94242600  | 1.37700200  |
| H              | -3.40581700 | 1.70704400  | -0.47004000 |
| <b>(R)-3ba</b> |             |             |             |
| C              | -2.03231600 | -2.51153600 | -0.07907800 |
| C              | -3.05381400 | -1.58981800 | 0.15985100  |
| C              | -2.79171500 | -0.21461500 | 0.24785300  |
| C              | -1.47541500 | 0.19635300  | 0.08312100  |
| C              | -0.44150100 | -0.71935600 | -0.15806900 |
| C              | -0.70750800 | -2.07520900 | -0.23384800 |
| N              | -0.96339200 | 1.50864100  | 0.11842800  |
| C              | 0.38969100  | 1.51719800  | -0.10868900 |
| C              | 0.86210700  | 0.03685700  | -0.26011200 |

|   |             |             |             |
|---|-------------|-------------|-------------|
| O | 1.10971500  | 2.49905900  | -0.21199800 |
| H | -2.26307800 | -3.57028500 | -0.14172300 |
| H | -4.07459400 | -1.93955700 | 0.28253600  |
| H | -3.58997500 | 0.49547700  | 0.43501200  |
| H | 0.09635700  | -2.78354300 | -0.41078600 |
| C | -1.76943800 | 2.70425200  | 0.27096000  |
| H | -2.28537000 | 2.69791800  | 1.23627100  |
| H | -1.09926200 | 3.56275200  | 0.22075600  |
| H | -2.51154800 | 2.77210900  | -0.53132600 |
| C | 4.27947700  | -1.08041400 | 0.42116400  |
| H | 5.09692500  | -0.36442800 | 0.35811900  |
| C | 3.05187700  | -0.69751900 | 0.65188300  |
| C | 1.82035900  | -0.31378800 | 0.86650300  |
| H | 4.53349800  | -2.13032000 | 0.28672600  |
| H | 1.43259800  | -0.22374100 | 1.88024100  |
| O | 1.44170000  | -0.13188900 | -1.54266600 |
| H | 2.20605100  | 0.47133700  | -1.57675300 |

**TS-F**

|   |             |             |             |
|---|-------------|-------------|-------------|
| N | 0.07276600  | -0.44868600 | -2.03586600 |
| C | 1.54856100  | -0.32749300 | -2.24710000 |
| H | 1.93804400  | -1.34281500 | -2.28333500 |
| C | 1.70266200  | 0.35356500  | -3.62308200 |
| H | 1.81603000  | -0.42294100 | -4.38397000 |
| H | 2.60233400  | 0.96669000  | -3.68296800 |
| C | 0.38799200  | 1.14163700  | -3.84863200 |
| H | -0.07876800 | 0.84736100  | -4.79274700 |
| H | 0.55760600  | 2.22007200  | -3.89188900 |
| C | -0.50704500 | 0.79165800  | -2.64084400 |
| H | -1.54823300 | 0.59759800  | -2.89953400 |
| H | -0.49817800 | 1.57838200  | -1.88951100 |
| C | 2.30535000  | 0.31365000  | -1.04032100 |
| C | 3.81302200  | 0.10058900  | -1.26573700 |
| C | 4.74391600  | 1.14057300  | -1.28875800 |
| C | 4.29575300  | -1.21414100 | -1.38348900 |
| C | 6.10722300  | 0.87857400  | -1.43862600 |
| H | 4.41891400  | 2.16538700  | -1.16365300 |
| C | 5.65551200  | -1.47208300 | -1.52281500 |
| H | 3.61102300  | -2.05478000 | -1.33117500 |
| C | 6.59040800  | -0.42739100 | -1.55897600 |
| H | 6.80734600  | 1.71003400  | -1.44625800 |
| H | 5.99696000  | -2.50126100 | -1.59991800 |
| C | 1.93279900  | 1.76096000  | -0.70936500 |
| C | 1.44146700  | 2.11190900  | 0.55321400  |

|    |             |             |             |
|----|-------------|-------------|-------------|
| C  | 2.11833900  | 2.80001000  | -1.63516500 |
| C  | 1.11709100  | 3.42969200  | 0.86517500  |
| H  | 1.28868100  | 1.35718300  | 1.30804400  |
| C  | 1.78420200  | 4.11624500  | -1.32268300 |
| H  | 2.54406500  | 2.60128000  | -2.60921900 |
| C  | 1.26136100  | 4.45617200  | -0.07057000 |
| H  | 0.73407200  | 3.65796000  | 1.85663100  |
| H  | 1.93362500  | 4.89050000  | -2.07088900 |
| C  | -1.81830900 | -2.06609100 | -2.53211100 |
| C  | -2.80840000 | -1.98930800 | -3.50729200 |
| C  | -3.42404000 | -3.09888900 | -1.02510900 |
| C  | -4.10620500 | -2.45211000 | -3.26140500 |
| H  | -2.55838500 | -1.57059100 | -4.48002600 |
| C  | -4.40146600 | -3.01366900 | -2.02144400 |
| H  | -4.87010700 | -2.38599100 | -4.02916500 |
| H  | -5.39948500 | -3.38612400 | -1.81696900 |
| C  | -3.74134000 | -3.70996300 | 0.29919700  |
| O  | -1.18831400 | -2.63403000 | -0.30703500 |
| F  | -2.99349100 | -4.80996900 | 0.56609800  |
| F  | -3.53126600 | -2.85909000 | 1.34779600  |
| F  | -5.03836900 | -4.09673000 | 0.39255500  |
| C  | -0.39744300 | -1.66661800 | -2.80092300 |
| H  | 0.26022000  | -2.48354100 | -2.49185300 |
| H  | -0.25109800 | -1.49810000 | -3.87350100 |
| C  | -2.11229800 | -2.60962300 | -1.24954000 |
| Zn | -0.57213600 | -0.76740800 | -0.02883100 |
| C  | -6.33819900 | 0.36098000  | 1.73063900  |
| C  | -6.84152900 | 1.66442300  | 1.73390000  |
| C  | -6.05695700 | 2.75138500  | 1.31645600  |
| C  | -4.75798800 | 2.48254300  | 0.90565000  |
| C  | -4.23420400 | 1.17642900  | 0.91910500  |
| C  | -5.02045500 | 0.10750200  | 1.31928600  |
| N  | -3.79779600 | 3.38225900  | 0.40857800  |
| C  | -2.65147400 | 2.72137700  | 0.00642700  |
| C  | -2.81972300 | 1.24916300  | 0.44365100  |
| O  | -2.26287900 | 0.30534500  | -0.22044900 |
| O  | -1.71049700 | 3.22606100  | -0.58867400 |
| H  | -6.97133600 | -0.46221600 | 2.04764100  |
| H  | -7.86243800 | 1.84589000  | 2.05721800  |
| H  | -6.45881000 | 3.75913400  | 1.30708000  |
| H  | -4.61988400 | -0.89950400 | 1.31313100  |
| C  | -4.03099100 | 4.79461400  | 0.18695300  |
| H  | -4.24527900 | 5.30304300  | 1.13273200  |
| H  | -3.12545900 | 5.21227500  | -0.25476000 |



|   |             |             |             |
|---|-------------|-------------|-------------|
| H | -4.87246300 | 4.94730600  | -0.49800000 |
| O | 1.89203500  | -0.56043700 | 0.04932300  |
| C | 8.06174700  | -0.70982300 | -1.73330500 |
| H | 8.37374800  | -1.57597000 | -1.13971700 |
| H | 8.29770700  | -0.93507200 | -2.78140800 |
| H | 8.67073600  | 0.14890400  | -1.43494500 |
| C | 0.82433200  | 5.86316700  | 0.24459500  |
| H | 1.31940100  | 6.59498700  | -0.40147400 |
| H | -0.25833500 | 5.96344700  | 0.09265600  |
| H | 1.03235600  | 6.12564800  | 1.28744500  |
| C | -0.42056900 | -0.53901900 | 2.10476600  |
| H | 0.26429700  | -1.27180300 | 2.49603800  |
| C | -1.07707400 | 0.49046000  | 2.35562000  |
| O | 3.63795000  | 0.04877800  | 1.64014900  |
| O | 2.38673500  | -1.85617900 | 1.97353000  |
| C | 3.47965000  | -1.91086700 | 2.94755100  |
| C | 4.52933300  | -2.86155400 | 2.36715500  |
| C | 2.93328300  | -2.44608300 | 4.26319700  |
| H | 4.92576800  | -2.48351500 | 1.41948000  |
| H | 5.36186700  | -3.00544400 | 3.06204400  |
| H | 4.06295000  | -3.83341900 | 2.18048300  |
| H | 2.08290100  | -1.85868800 | 4.61632200  |
| H | 2.60533300  | -3.48188700 | 4.13231200  |
| H | 3.71177700  | -2.43022900 | 5.03295900  |
| C | 3.95945200  | -0.41447900 | 2.98832000  |
| C | 3.14850600  | 0.45587300  | 3.95131200  |
| C | 5.45310000  | -0.22678600 | 3.21552700  |
| H | 2.07253400  | 0.32709300  | 3.79649200  |
| H | 3.38109400  | 0.22051900  | 4.99399800  |
| H | 3.39424800  | 1.50625500  | 3.76963800  |
| H | 6.03872100  | -0.70160000 | 2.42552000  |
| H | 5.69222500  | 0.84106300  | 3.22432800  |
| H | 5.75118700  | -0.65096100 | 4.17999600  |
| B | 2.64641500  | -0.76690300 | 1.17818000  |
| C | -1.91124800 | 1.59000200  | 2.27889100  |
| H | -2.78492300 | 1.58476800  | 2.92485100  |
| H | -1.41810900 | 2.55824500  | 2.20634900  |

**Int-III F**

|   |             |             |             |
|---|-------------|-------------|-------------|
| N | -0.03945000 | -0.02932800 | -2.23548200 |
| C | 1.44516600  | -0.00920800 | -2.37880300 |
| H | 1.76124900  | -1.04641200 | -2.46226200 |
| C | 1.72052500  | 0.73000400  | -3.70696300 |
| H | 1.85652400  | -0.01779100 | -4.49258800 |

|   |             |             |             |
|---|-------------|-------------|-------------|
| H | 2.64392300  | 1.30986500  | -3.67869400 |
| C | 0.45143100  | 1.57581500  | -3.98866600 |
| H | 0.01532400  | 1.29829400  | -4.95215800 |
| H | 0.66438100  | 2.64691200  | -4.02720200 |
| C | -0.50998000 | 1.25867500  | -2.82364700 |
| H | -1.55356900 | 1.14778900  | -3.12539100 |
| H | -0.46581700 | 2.01699800  | -2.04433000 |
| C | 2.17643100  | 0.48110600  | -1.08664600 |
| C | 3.66994300  | 0.16794100  | -1.24647200 |
| C | 4.66071500  | 1.14530500  | -1.13610300 |
| C | 4.07478900  | -1.15932700 | -1.46843200 |
| C | 6.01132000  | 0.80925300  | -1.24587600 |
| H | 4.38690000  | 2.17544000  | -0.94550500 |
| C | 5.42196300  | -1.49107100 | -1.56794900 |
| H | 3.33907700  | -1.95523400 | -1.53170300 |
| C | 6.41909300  | -0.51045300 | -1.46084900 |
| H | 6.76052700  | 1.59065700  | -1.14921100 |
| H | 5.70388300  | -2.52869400 | -1.72755400 |
| C | 1.91016900  | 1.91686000  | -0.63496600 |
| C | 1.57204200  | 2.19864600  | 0.69477000  |
| C | 2.06656600  | 3.00544100  | -1.50374300 |
| C | 1.36084500  | 3.50420100  | 1.12391600  |
| H | 1.46197400  | 1.39844300  | 1.41095300  |
| C | 1.83873600  | 4.31242900  | -1.07318700 |
| H | 2.38345400  | 2.85641800  | -2.52582800 |
| C | 1.46723500  | 4.58705900  | 0.24609300  |
| H | 1.08240500  | 3.68284300  | 2.15806600  |
| H | 1.95401200  | 5.12932000  | -1.78099200 |
| C | -1.98399600 | -1.62126500 | -2.61400000 |
| C | -3.04053700 | -1.57971400 | -3.51947500 |
| C | -3.38900600 | -2.87576500 | -1.07175000 |
| C | -4.27831500 | -2.15609200 | -3.21493700 |
| H | -2.88470300 | -1.11110900 | -4.48885600 |
| C | -4.43059000 | -2.82835600 | -2.00611500 |
| H | -5.09758300 | -2.11229700 | -3.92490700 |
| H | -5.36833400 | -3.32134900 | -1.77499100 |
| C | -3.54346500 | -3.72377100 | 0.15196200  |
| O | -1.18647700 | -2.16743200 | -0.43194500 |
| F | -2.84902900 | -4.88931000 | 0.04899000  |
| F | -3.11881500 | -3.14750800 | 1.30416600  |
| F | -4.84112400 | -4.07108200 | 0.36799800  |
| C | -0.59377200 | -1.19798000 | -3.00258000 |
| H | 0.07763100  | -2.03753000 | -2.80201900 |
| H | -0.55263300 | -0.98675500 | -4.07778300 |

|    |             |             |             |
|----|-------------|-------------|-------------|
| C  | -2.15709200 | -2.22240900 | -1.33209700 |
| Zn | -0.62719600 | -0.29960300 | -0.20003900 |
| C  | -5.44433800 | -0.48151000 | 0.87800800  |
| C  | -6.35871100 | 0.56574500  | 0.75676900  |
| C  | -5.93744200 | 1.90511600  | 0.79467400  |
| C  | -4.57812000 | 2.14543900  | 0.95577000  |
| C  | -3.64817900 | 1.10396700  | 1.08418600  |
| C  | -4.07605800 | -0.21057300 | 1.04338700  |
| N  | -3.91739800 | 3.38675100  | 1.01208000  |
| C  | -2.55911700 | 3.22627300  | 1.16919000  |
| C  | -2.24779300 | 1.69190700  | 1.18260000  |
| O  | -1.44070800 | 1.38808200  | 0.10192800  |
| O  | -1.75022000 | 4.13698200  | 1.28230000  |
| H  | -5.78205800 | -1.51259000 | 0.83733800  |
| H  | -7.41536800 | 0.34880500  | 0.62789200  |
| H  | -6.65063800 | 2.71709900  | 0.69672700  |
| H  | -3.36702700 | -1.02025000 | 1.13551100  |
| C  | -4.57366200 | 4.67384600  | 0.91602900  |
| H  | -5.30198200 | 4.79794000  | 1.72484800  |
| H  | -3.80424400 | 5.44240600  | 0.99760800  |
| H  | -5.09047300 | 4.77393900  | -0.04473100 |
| O  | 1.61414000  | -0.44061900 | -0.08362700 |
| C  | 7.87749500  | -0.87350000 | -1.58743800 |
| H  | 8.11475600  | -1.77292600 | -1.00862300 |
| H  | 8.14145400  | -1.08345800 | -2.63182100 |
| H  | 8.52200700  | -0.06102900 | -1.23899000 |
| C  | 1.15327300  | 5.98618000  | 0.70841800  |
| H  | 1.43511500  | 6.73182800  | -0.04141200 |
| H  | 0.07815200  | 6.08047800  | 0.90166400  |
| H  | 1.67361200  | 6.22607500  | 1.64305300  |
| C  | -0.62607900 | -1.11562700 | 2.46947900  |
| H  | -0.25636000 | -2.11341500 | 2.40317300  |
| C  | -1.03064100 | 0.02342200  | 2.55664600  |
| O  | 3.33881100  | -0.28039500 | 1.63003800  |
| O  | 2.05140900  | -2.18218200 | 1.48243900  |
| C  | 3.10135200  | -2.48766600 | 2.45807300  |
| C  | 4.12804200  | -3.35558400 | 1.72793000  |
| C  | 2.47814300  | -3.25588600 | 3.61561700  |
| H  | 4.57746400  | -2.81740300 | 0.88868100  |
| H  | 4.92483400  | -3.67923200 | 2.40398700  |
| H  | 3.62544900  | -4.24473500 | 1.33563500  |
| H  | 1.65289500  | -2.70478800 | 4.07103500  |
| H  | 2.09492200  | -4.21532200 | 3.25461700  |
| H  | 3.22851300  | -3.45833300 | 4.38677000  |

|   |             |             |            |
|---|-------------|-------------|------------|
| C | 3.64663100  | -1.05650000 | 2.83025100 |
| C | 2.88432900  | -0.39263900 | 3.97882500 |
| C | 5.14959100  | -0.98610500 | 3.06641400 |
| H | 1.80385000  | -0.41885900 | 3.80736500 |
| H | 3.10125200  | -0.87941400 | 4.93422200 |
| H | 3.19331900  | 0.65474900  | 4.04712200 |
| H | 5.70761500  | -1.29574600 | 2.18021800 |
| H | 5.43394400  | 0.04277500  | 3.30731800 |
| H | 5.43779100  | -1.62518000 | 3.90736800 |
| B | 2.34155100  | -0.94394200 | 0.98095900 |
| C | -1.54715400 | 1.38495600  | 2.54532300 |
| H | -2.24158500 | 1.54019300  | 3.37940600 |
| H | -0.72540200 | 2.10052800  | 2.65590300 |

**Int-IVF**

|   |             |             |             |
|---|-------------|-------------|-------------|
| C | -1.80731100 | -2.89082900 | 0.77383100  |
| C | -2.98761300 | -2.95748500 | 0.03183100  |
| C | -3.54439800 | -1.80901100 | -0.54642700 |
| C | -2.86912000 | -0.60921000 | -0.36388000 |
| C | -1.66646300 | -0.52748800 | 0.35729800  |
| C | -1.14148300 | -1.66870500 | 0.94714700  |
| N | -3.26443100 | 0.66611300  | -0.80844500 |
| C | -2.38715800 | 1.63054600  | -0.39126700 |
| C | -1.23856800 | 0.92687400  | 0.39715300  |
| O | -0.05597600 | 1.28646900  | -0.30892600 |
| O | -2.47136000 | 2.83132000  | -0.59359700 |
| H | -1.39950700 | -3.79131300 | 1.22253600  |
| H | -3.49192400 | -3.91081300 | -0.09600300 |
| H | -4.47181600 | -1.85764800 | -1.10671000 |
| H | -0.22257800 | -1.61430300 | 1.51441900  |
| C | -4.46227300 | 0.93864200  | -1.57823800 |
| H | -5.35351100 | 0.62840300  | -1.02320100 |
| H | -4.50058000 | 2.01293500  | -1.75936500 |
| H | -4.43238100 | 0.40637400  | -2.53420800 |
| C | 0.90071300  | 0.71095900  | 3.24879800  |
| H | 1.73755300  | 0.37055400  | 3.81714000  |
| C | -0.05032300 | 1.08321700  | 2.60408200  |
| O | 2.19559600  | 1.25956700  | -0.99088100 |
| O | 1.44764700  | -0.59942400 | 0.14160600  |
| C | 2.77096500  | -0.94112300 | -0.36562100 |
| C | 2.55469000  | -1.79125100 | -1.61973000 |
| C | 3.50405700  | -1.74110800 | 0.70304400  |
| H | 2.03290500  | -1.22450300 | -2.39708200 |
| H | 3.50405700  | -2.15024800 | -2.02809800 |

|   |             |             |             |
|---|-------------|-------------|-------------|
| H | 1.94038200  | -2.65791200 | -1.35799300 |
| H | 3.52586000  | -1.20913500 | 1.65639900  |
| H | 2.99857000  | -2.69971400 | 0.85665600  |
| H | 4.53355900  | -1.94593300 | 0.39106100  |
| C | 3.38214800  | 0.47403500  | -0.67213900 |
| C | 4.02597800  | 1.12665900  | 0.55436000  |
| C | 4.33257400  | 0.51624000  | -1.86126600 |
| H | 3.34840200  | 1.10573900  | 1.41370600  |
| H | 4.95867900  | 0.62612700  | 0.83107100  |
| H | 4.25103700  | 2.17191300  | 0.32228400  |
| H | 3.84007600  | 0.19365900  | -2.78099900 |
| H | 4.69608500  | 1.53822600  | -2.00708800 |
| H | 5.19861200  | -0.12977200 | -1.68236500 |
| B | 1.14273000  | 0.64076900  | -0.35624700 |
| C | -1.18604800 | 1.54457700  | 1.81292700  |
| H | -2.12787100 | 1.32157400  | 2.32856900  |
| H | -1.13769100 | 2.63247200  | 1.68259400  |

**(R)-3ba'**

|   |             |             |             |
|---|-------------|-------------|-------------|
| C | -0.65116000 | 2.94782900  | 0.23256800  |
| C | -1.96401200 | 2.58579100  | -0.07366300 |
| C | -2.33062100 | 1.24162900  | -0.23539700 |
| C | -1.33614700 | 0.28592300  | -0.07821900 |
| C | -0.01013500 | 0.63533100  | 0.22190100  |
| C | 0.34075000  | 1.96584000  | 0.38136100  |
| N | -1.45987900 | -1.11580500 | -0.17246100 |
| C | -0.26095800 | -1.72875900 | 0.07352000  |
| C | 0.80898000  | -0.62822600 | 0.29434100  |
| O | -0.04195800 | -2.93164700 | 0.13314800  |
| H | -0.39440200 | 3.99520200  | 0.35646200  |
| H | -2.72148600 | 3.35550100  | -0.18822800 |
| H | -3.35317700 | 0.96554100  | -0.46911300 |
| H | 1.36431200  | 2.23877700  | 0.61307100  |
| C | -2.70487700 | -1.82308300 | -0.40245700 |
| H | -3.12458100 | -1.55237000 | -1.37628700 |
| H | -2.48667100 | -2.89114100 | -0.38305300 |
| H | -3.43178500 | -1.58373800 | 0.38047000  |
| C | 3.87101100  | 0.99220000  | -0.57142800 |
| H | 4.67155400  | 1.69117300  | -0.47164600 |
| C | 2.96691200  | 0.19918400  | -0.68471500 |
| C | 1.87259600  | -0.75609700 | -0.82574300 |
| H | 1.38253100  | -0.63011300 | -1.79942100 |
| H | 2.25706700  | -1.78437600 | -0.79870400 |
| O | 1.38929900  | -0.79029000 | 1.58060500  |

## Reference:

- [1] (a) Guo, F.; Lai, G.; Xiong, S.; Wang, S.; Wang, Z. *Chem. Eur. J.* **2010**, *16*, 6438-6441. (b) Zhang, S.; Xu, K.; Guo, F.; Hu, Y.; Zha, Z.; Wang, Z. *Chem. Eur. J.* **2014**, *20*, 979-982.
- [2] (a) Li, C.; Guo, F.; Xu, K.; Zhang, S.; Hu, Y.; Zha, Z.; Wang, Z. *Org. Lett.* **2014**, *16*, 3192-3195. (b) Liu, Z.; Gu, P.; Shi, M.; McDowell, P.; Li, G. *Org. Lett.* **2011**, *13*, 2314-2317. (c) Curti, C.; Sartori, A.; Battistini, L.; Brindani, N.; Rassu, G.; Pelosi, G.; Lodola, A.; Mor, M.; Casiraghi, G.; Zanardi, F. *Chem. Eur. J.* **2015**, *21*, 6433-6442. (d) Silverio, D. L.; Torker, S.; Pilyugina, T. Vieira, E. M.; Snapper, M. L.; Haeffner, F.; Hoveyda, A. H. *Nature*, **2013**, *494*, 216-221. (e) He, R.; Wu, S.; Tang, H.; Huo, X.; Sun, Z.; Zhang, W. *Org. Lett.* **2018**, *20*, 6183-6187. (f) Shakoori, A. Bremner, J. B.; Willis, A. C.; Haritakun, R.; Keller, P. A. *J. Org. Chem.* **2013**, *78*, 7639-7647.
- [3] Qiao XC, Zhu SF, Q.-L. Zhou, *Tetrahedron Asymmetry*, **2009**, *20*, 1254-1261.
- [4] Wang T; Hao XQ; Huang JJ; Wang K; Gong JF; Song MP. *Organometallics*, **2014**, *33*, 194-205.
- [5] Wang P; C, X; Zhang, S. *Synthesis*, 2021, *53*, 3836 – 3846.
- [6] Wang, J; Zhang, Q; Li, Y; Liu, X; Li, X; Cheng, JP. *Chemical Communications*, **2019**, *56*, 261 – 264.
- [7] Silverio, DL; Torker S. Pilyugina T, Vieiral EM, Snapper ML, Haeffner F, Hoveyda, AH. *Nature*, 2013, *494*, 216-221.
- [8] Ghosh, S.; Kintada, L.; Bhunia, S.; Bisai, A. *Chemical Communications*, **2012**, *48*, 10132 – 10134.
- [9] Hanhan, N.; Tang, Y.; Tran, N.; Franz, A. *Organic Letters*, **2012**, *14*, 2218 – 2221.
- [10] Müller, G; Berkenbosch, T.; Benningshof, J.; Stumpfe, D.; Bajorath, J. *Chemistry - A European Journal*, **2017**, *23*, 703 – 710.
- [11] Alcaide, B.; Almendros, P.; Rodriguez-Acebes, R. *Journal of Organic Chemistry*, **2006**, *71*, 2346 – 2351.
- [12] Park, J.; Jean, A; Chen, D. *Journal of Organic Chemistry*, 2018, *83*, 6936 – 6957.
- [13] Frisch, M. J.; Trucks, G. W.; Schlegel, H. B.; Scuseria, G. E.; Robb, M. A.; Cheeseman, J. R.; Scalmani, G.; Barone, V.; Petersson, G. A.; Nakatsuji, H.; Li, X.; Caricato, M.; Marenich, A. V.; Bloino, J.; Janesko, B. G.; Gomperts, R.; Mennucci, B.; Hratchian, H. P.; Ortiz, J. V.; Izmaylov, A. F.; Sonnenberg, J. L.; Williams-Young, D.; Ding, F.; Lipparini, F.; Egidi, F.; Goings, J.; Peng, B.; Petrone, A.; Henderson, T.; Ranasinghe, D.; Zakrzewski, V. G.; Gao, J.; Rega, N.; Zheng, G.; Liang, W.; Hada, M.; Ehara, M.; Toyota, K.; Fukuda, R.; Hasegawa, J.; Ishida, M.; Nakajima, T.; Honda, Y.; Kitao, O.; Nakai, H.; Vreven, T.; Throssell, K.; Jr. Montgomery, J. A.; Peralta, J. E.; Ogliaro, F.; Bearpark, M. J.; Heyd, J. J.; Brothers, E. N.; Kudin, K. N.; Staroverov, V. N.; Keith, T. A.; Kobayashi, R.; Normand, J.; Raghavachari, K.; Rendell, A. P.; Burant, J. C.; Iyengar, S. S.; Tomasi, J.; Cossi, M.; Millam, J. M.; Klene, M.; Adamo, C.; Cammi, R.; Ochterski, J. W.; Martin, R. L.; Morokuma, K.; Farkas, O.; Foresman, J. B.; Fox, D. J. *Gaussian 16, Revision C.01*, Gaussian, Inc., Wallingford CT, **2016**.
- [14] (a) Becke, A. D. *J. Chem. Phys.* **1993**, *98*, 5648. (b) Lee, C. T.; Yang, W. T.; Parr, R. G. *Phys. Rev. B* **1988**, *37*, 785.
- [15] (a) Grimme, S.; Antony, J.; Ehrlich, S.; Krieg, H. *J. Chem. Phys.* **2010**, *132*, 154104; (b)

- Grimme, S.; Ehrlich, S.; Goerigk, L. *J. Comput. Chem.* **2011**, *32*, 1456.
- [16] Marenich, A. V.; Cramer, C. J.; Truhlar, D. G. *J. Phys. Chem. B* **2009**, *113*, 6378.
- [17] Andrae, D.; Häußermann, U.; Dolg, M.; Stoll, H.; Preuß, H. *Theor. Chim. Acta* **1990**, *77*, 123.
- [18] Hehre, W. J.; Radom, L.; Schleyer, P. v. R.; Pople, J. A., *Ab Initio Molecular Orbital Theory*; Wiley: New York, **1986**.
- [19] C. Y. Legault, CYLview, 1.0b, Université de Sherbrooke, **2009**, <http://www.cylview.org>

## Part II NMR spectra

### $^1\text{H}$ NMR and $^{13}\text{C}$ NMR of **3aa**

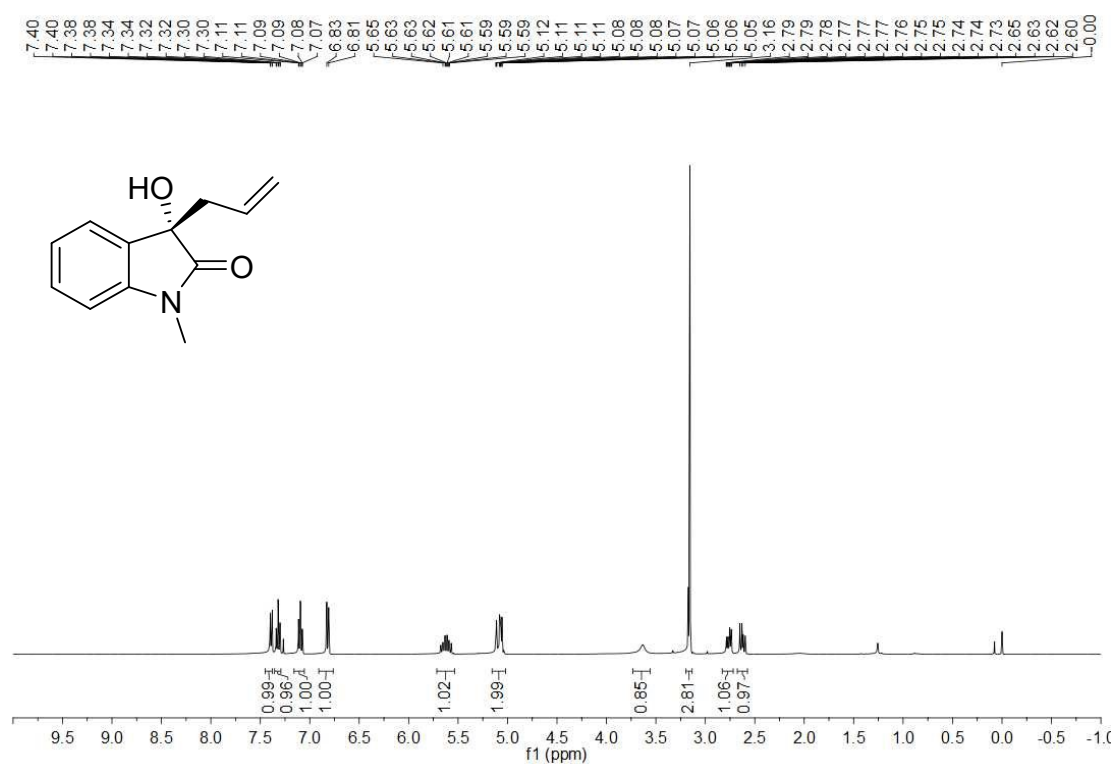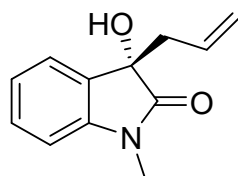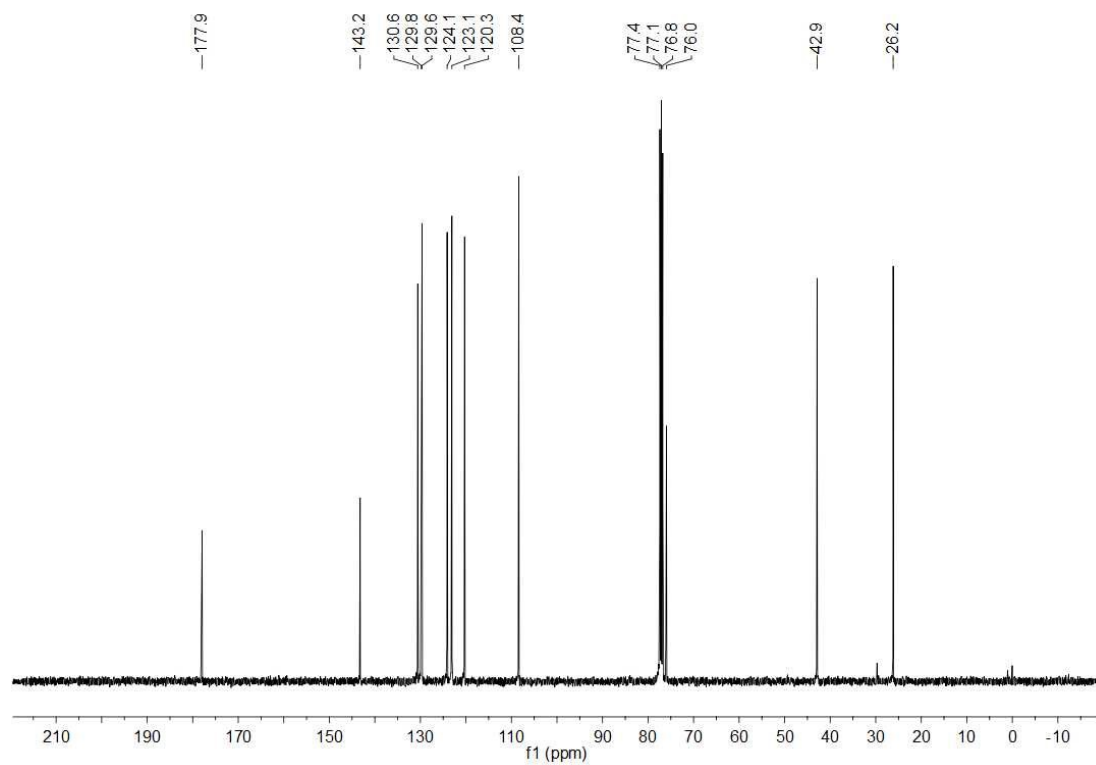



<sup>1</sup>H NMR and <sup>13</sup>C NMR of **3ab**

7.41  
7.39  
7.30  
7.30  
7.28  
7.27  
7.27  
7.26  
7.10  
7.09  
7.07  
6.82  
6.80  
5.82  
5.81  
5.80  
5.79  
5.78  
5.77  
5.63  
5.61  
5.60  
5.59  
5.58  
5.58  
5.58  
5.56  
5.24  
5.21  
5.20  
5.19  
5.12  
5.08  
5.06  
4.43  
4.43  
4.42  
4.42  
4.40  
4.39  
4.39  
4.39  
4.39  
4.19  
4.18  
4.16  
4.15  
3.37  
2.80  
2.79  
2.77  
2.76  
2.68  
2.66  
2.64  
0.07

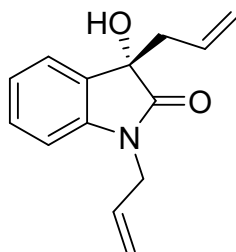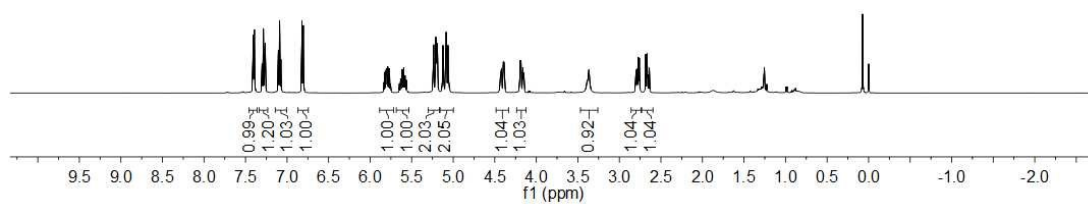

176.5  
141.4  
130.0  
129.5  
128.5  
122.0  
119.4  
108.6  
76.3  
76.0  
75.8  
74.9  
42.0  
41.3  
0.0

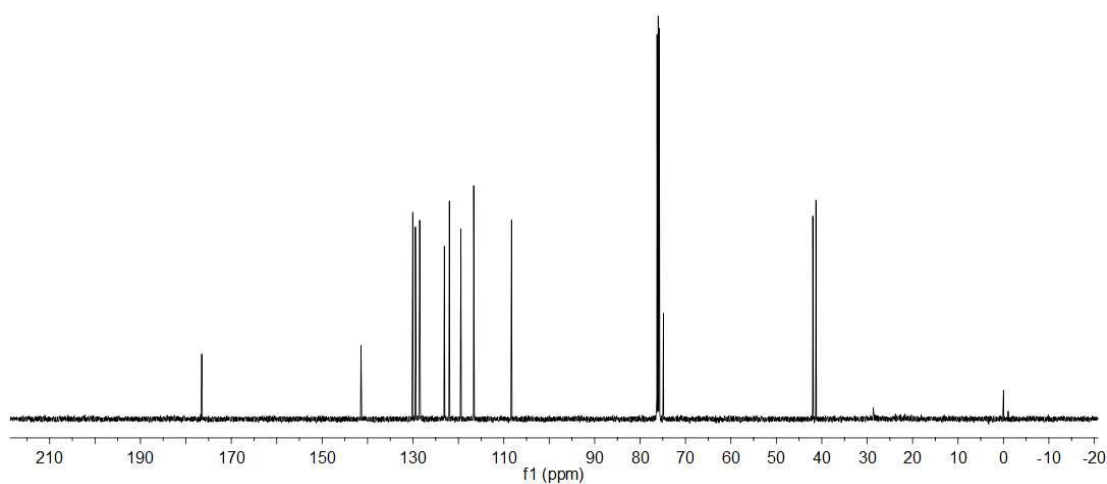

# <sup>1</sup>H NMR and <sup>13</sup>C NMR of **3ac**

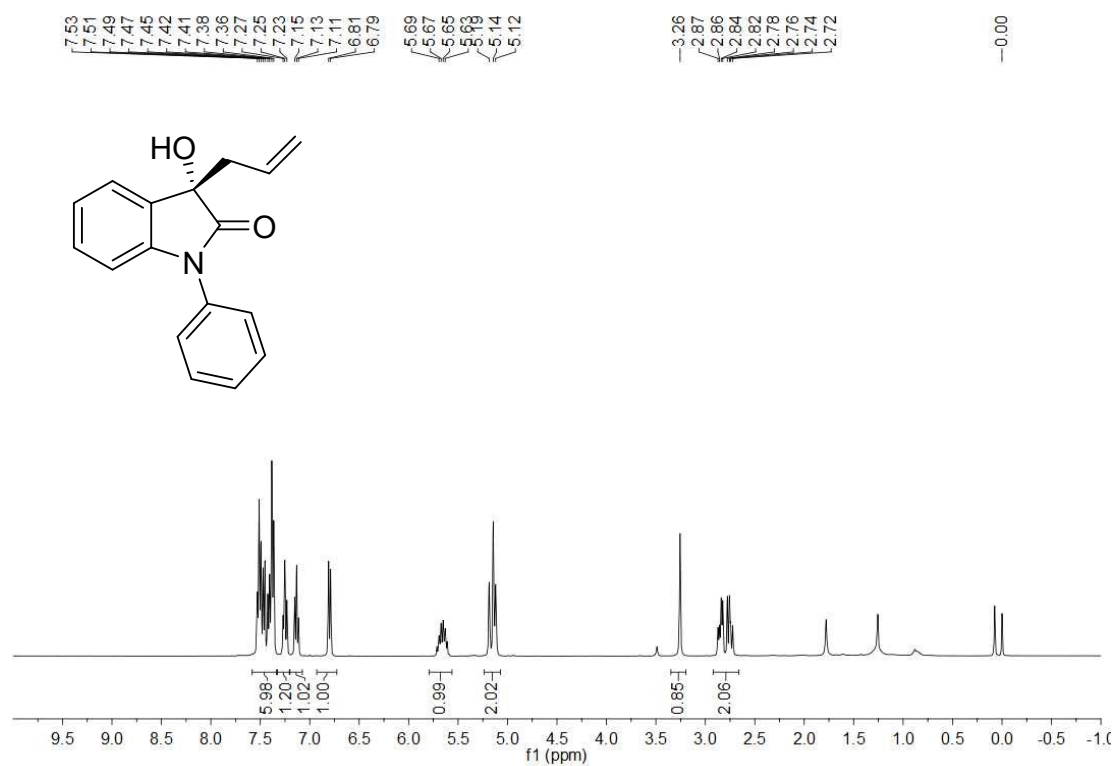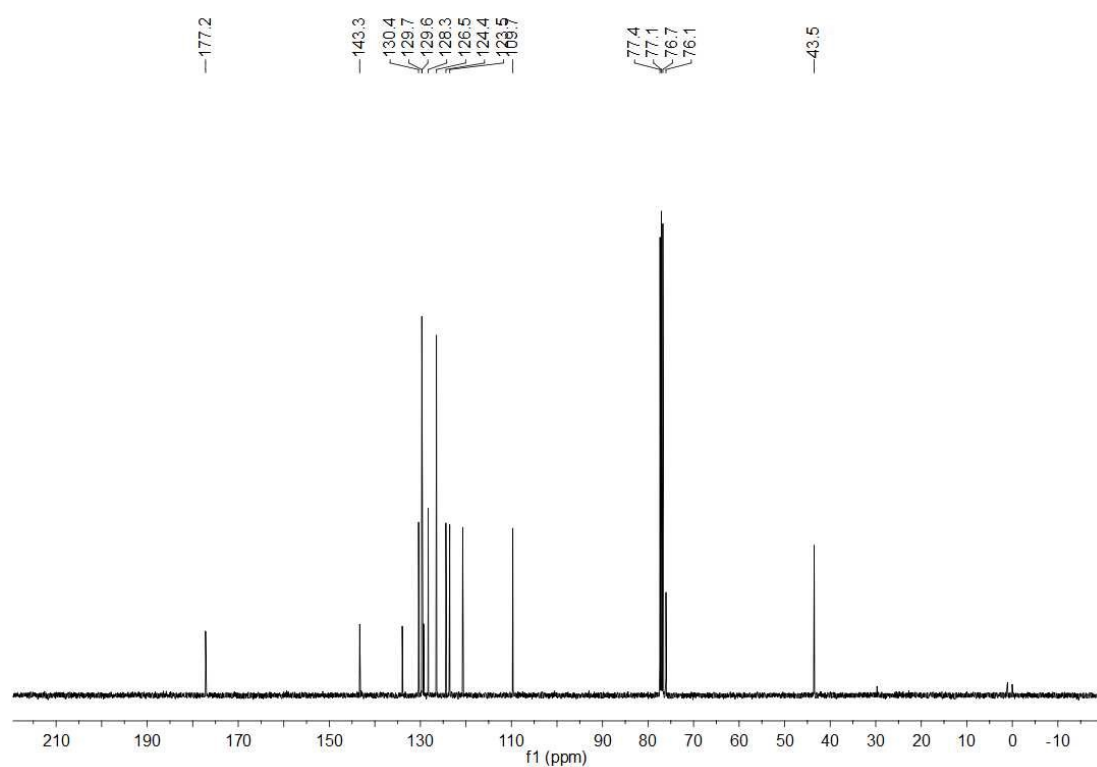

# <sup>1</sup>H NMR and <sup>13</sup>C NMR of 3ad

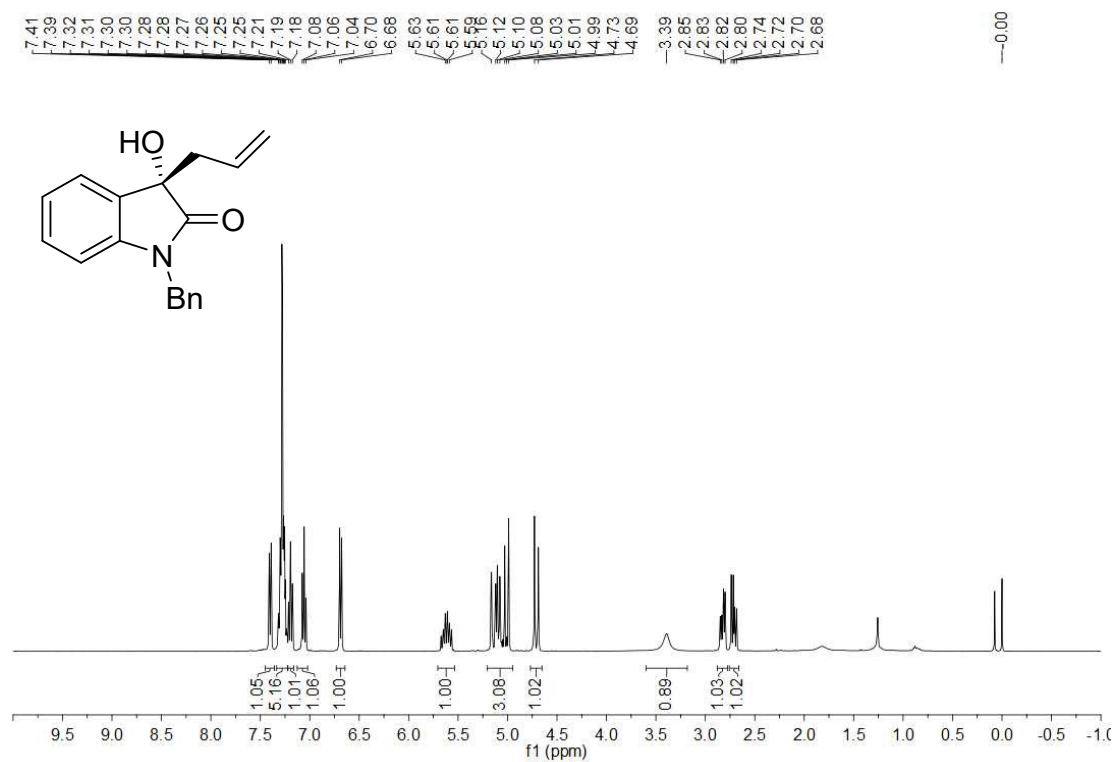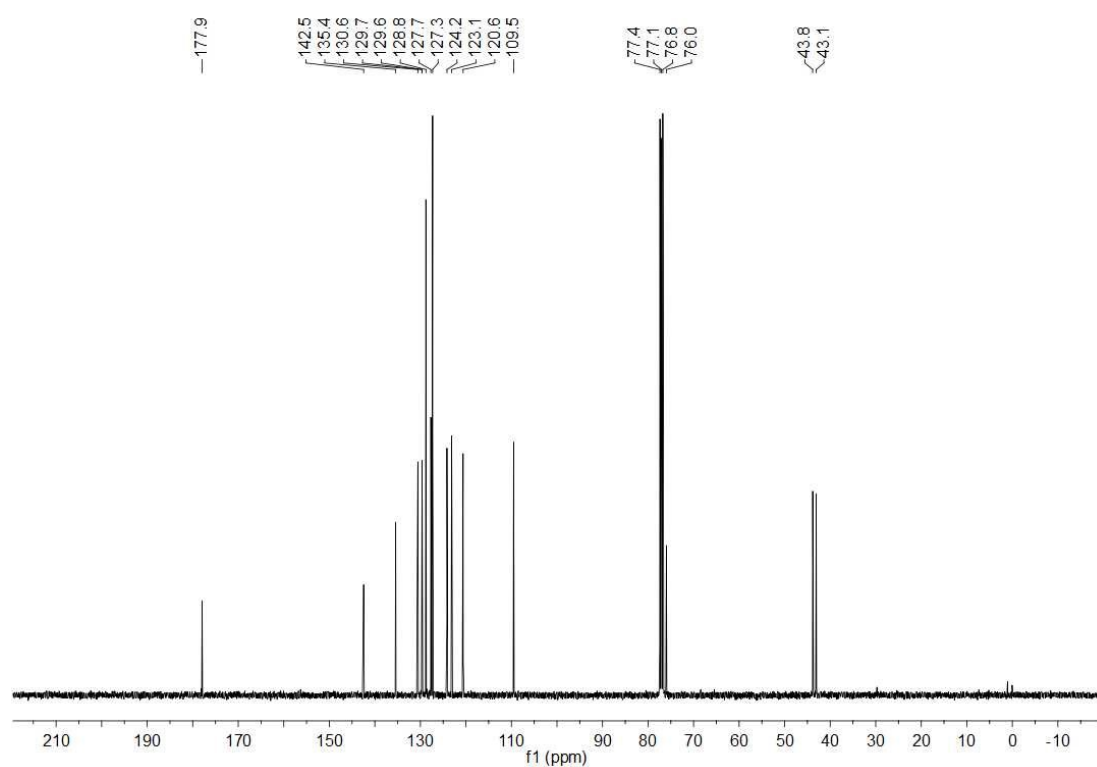

# $^1\text{H}$ NMR and $^{13}\text{C}$ NMR of **3ae**

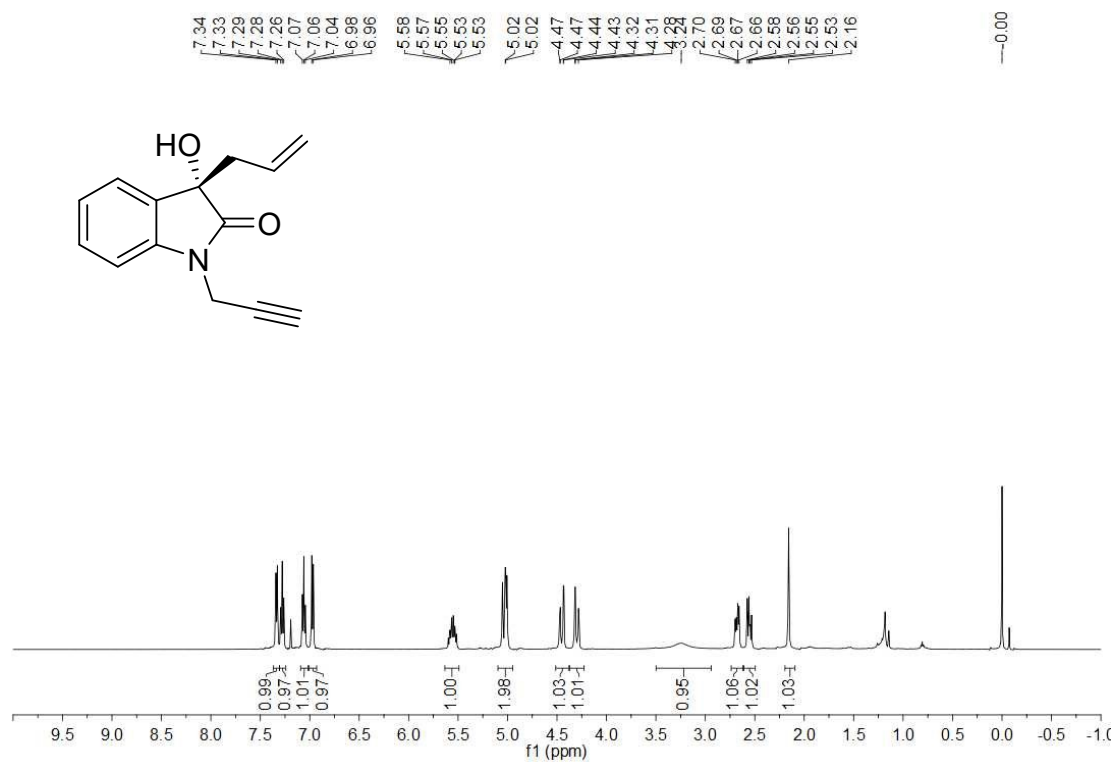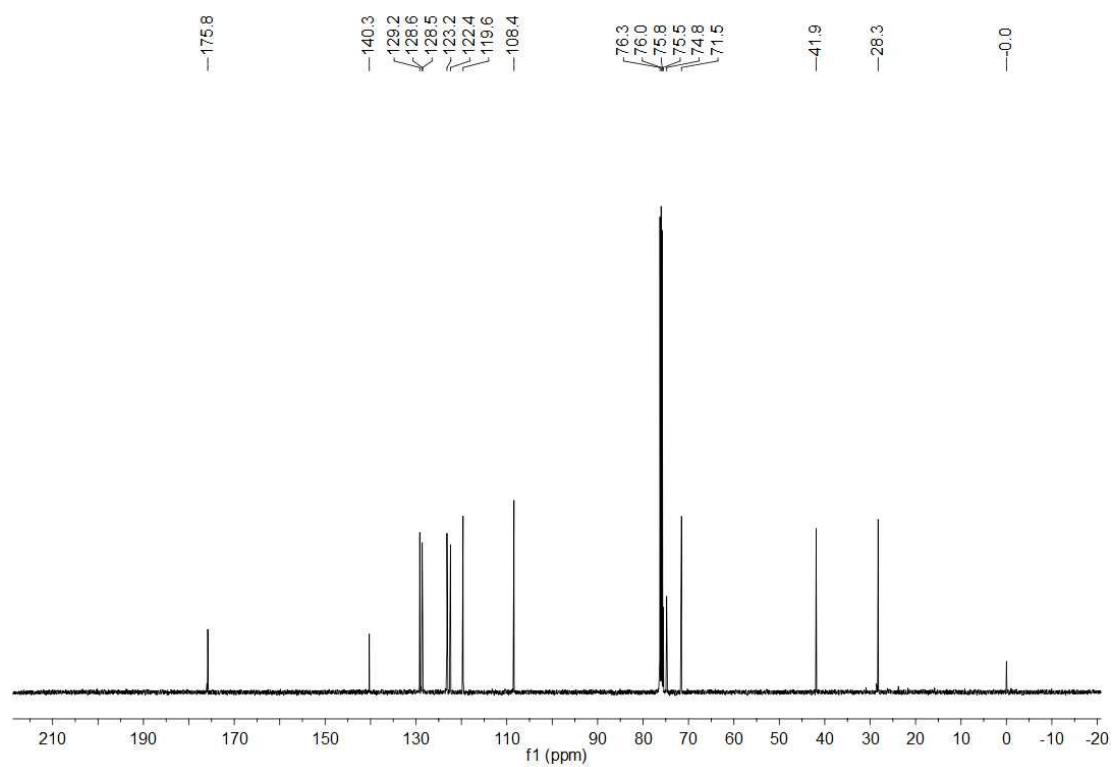

# $^1\text{H}$ NMR and $^{13}\text{C}$ NMR of **3af**

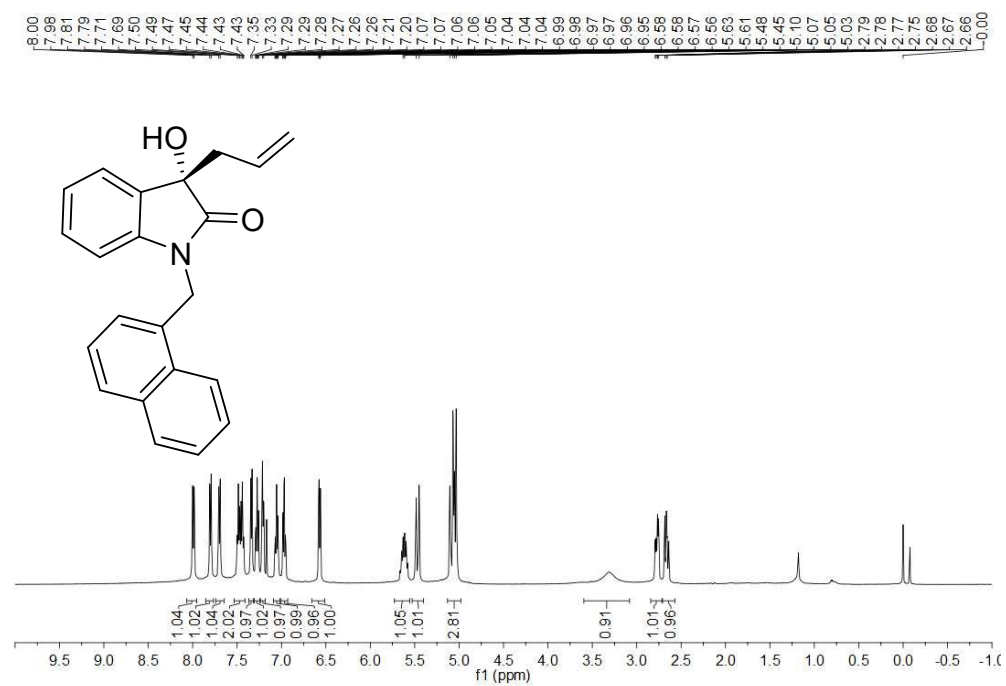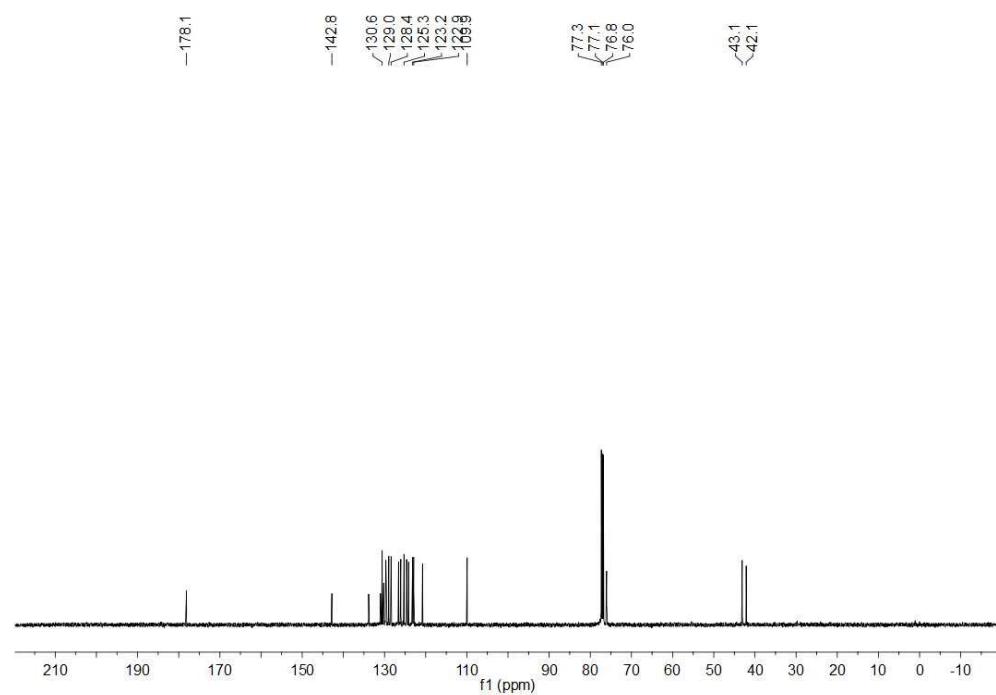

$^1\text{H}$  NMR and  $^{13}\text{C}$  NMR of **3ag**

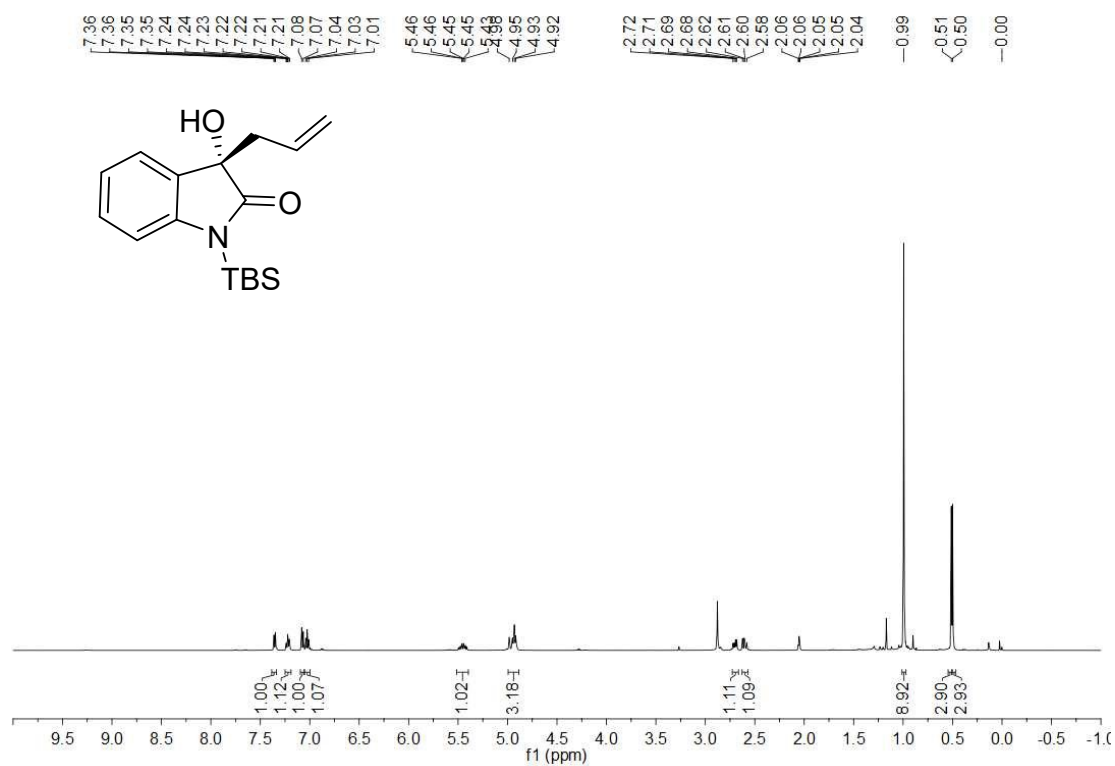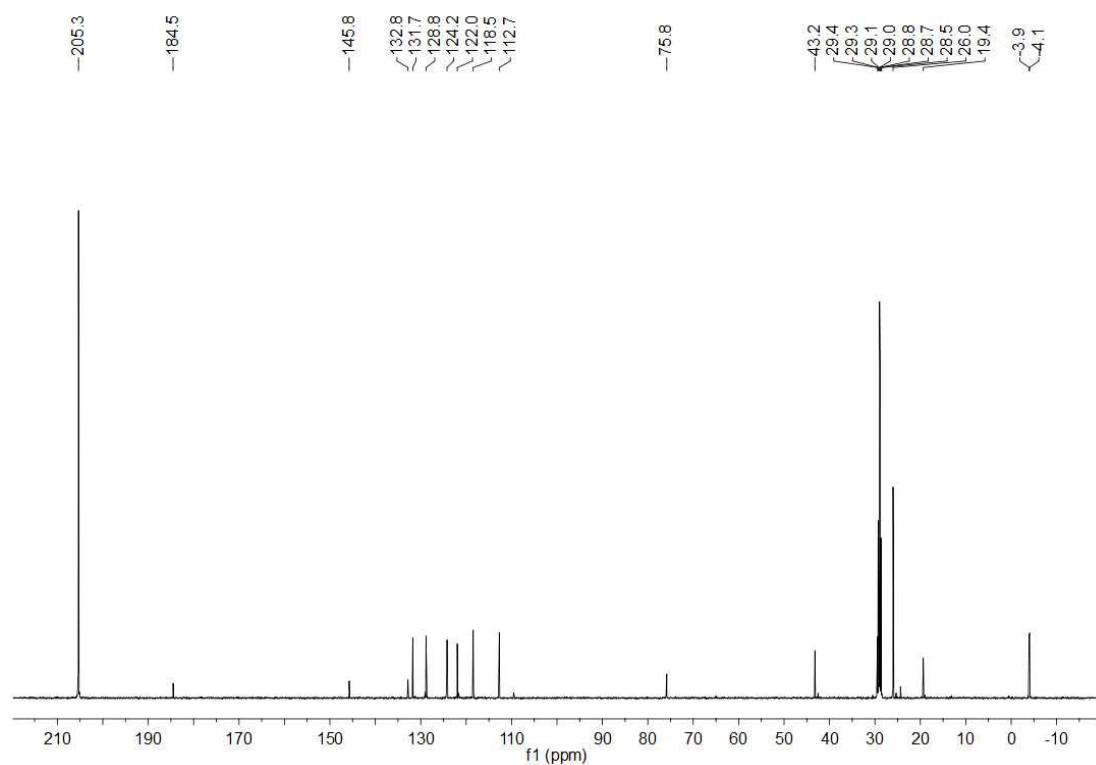

# $^1\text{H}$ NMR and $^{13}\text{C}$ NMR of **3ah**

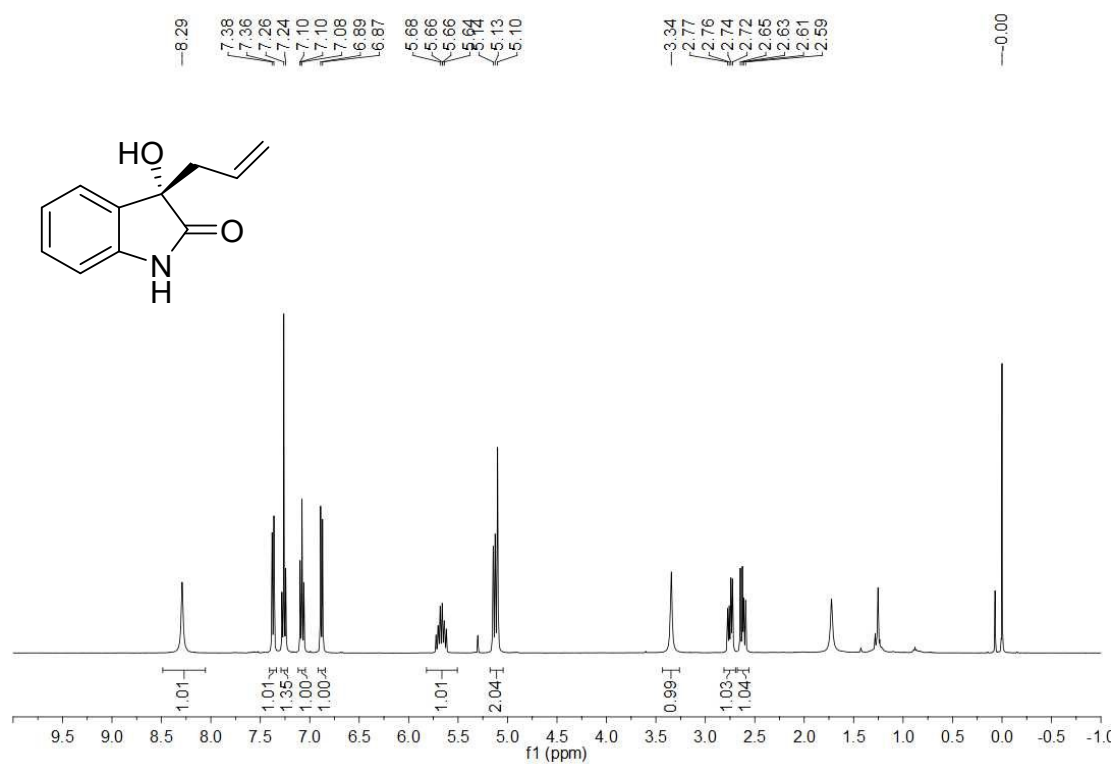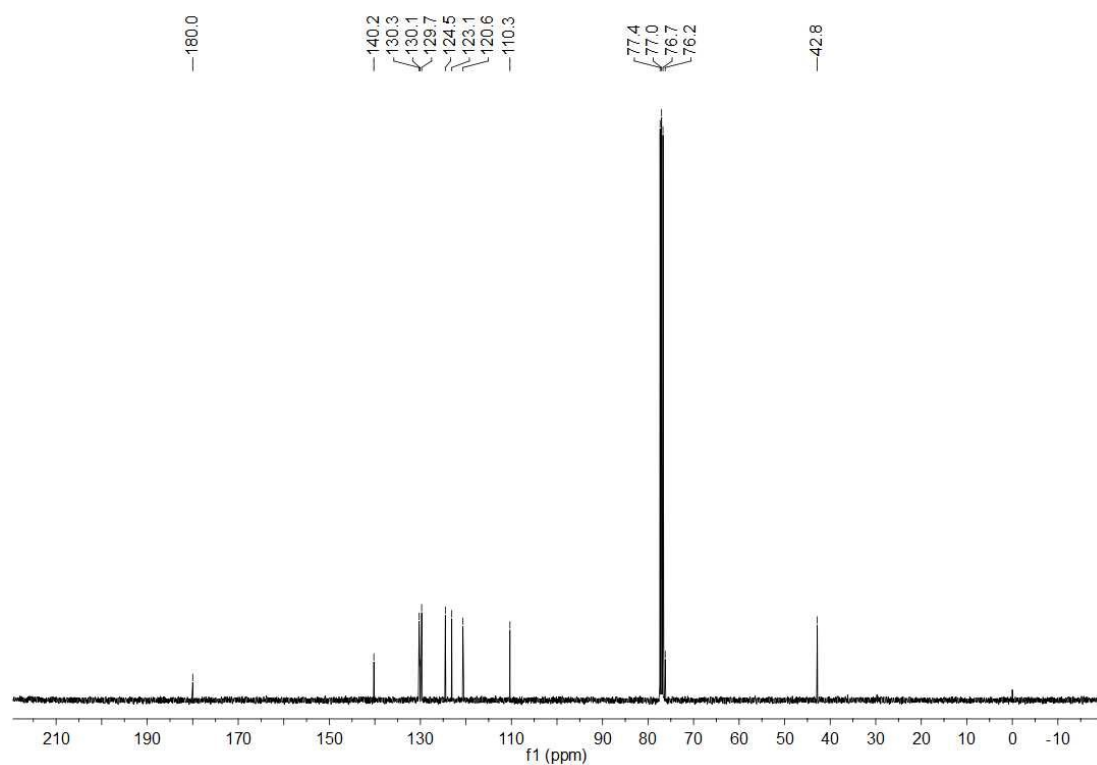

$^1\text{H}$  NMR and  $^{13}\text{C}$  NMR of **3ai**

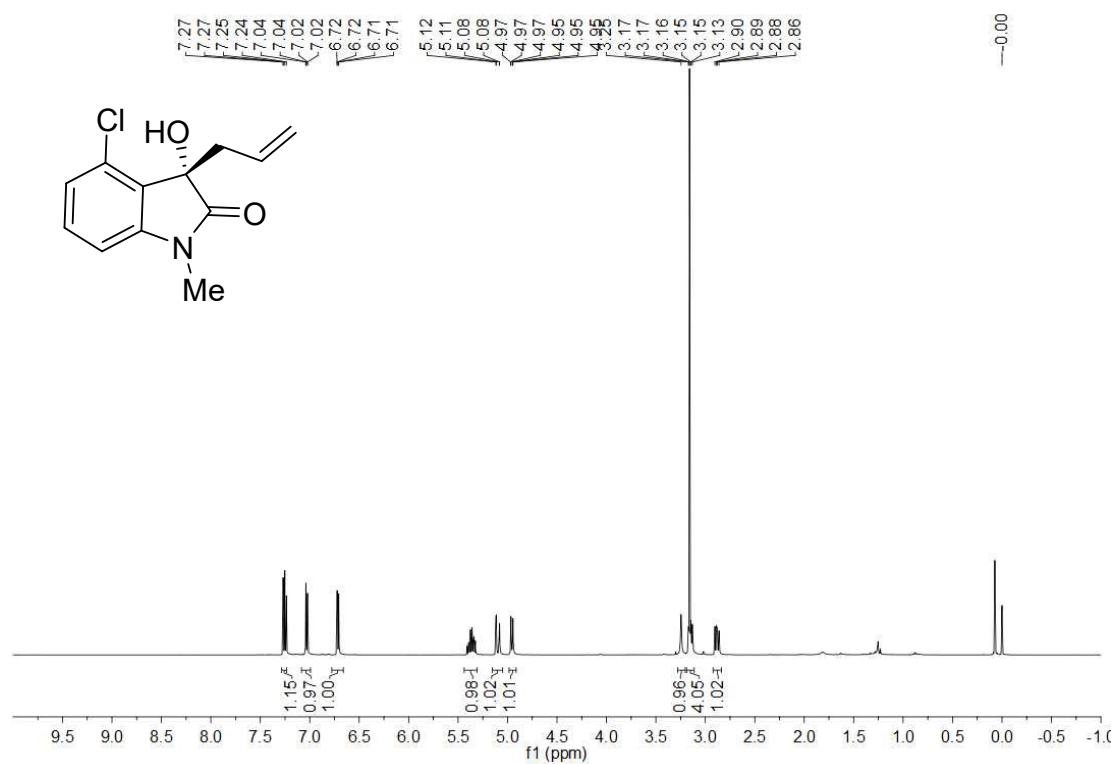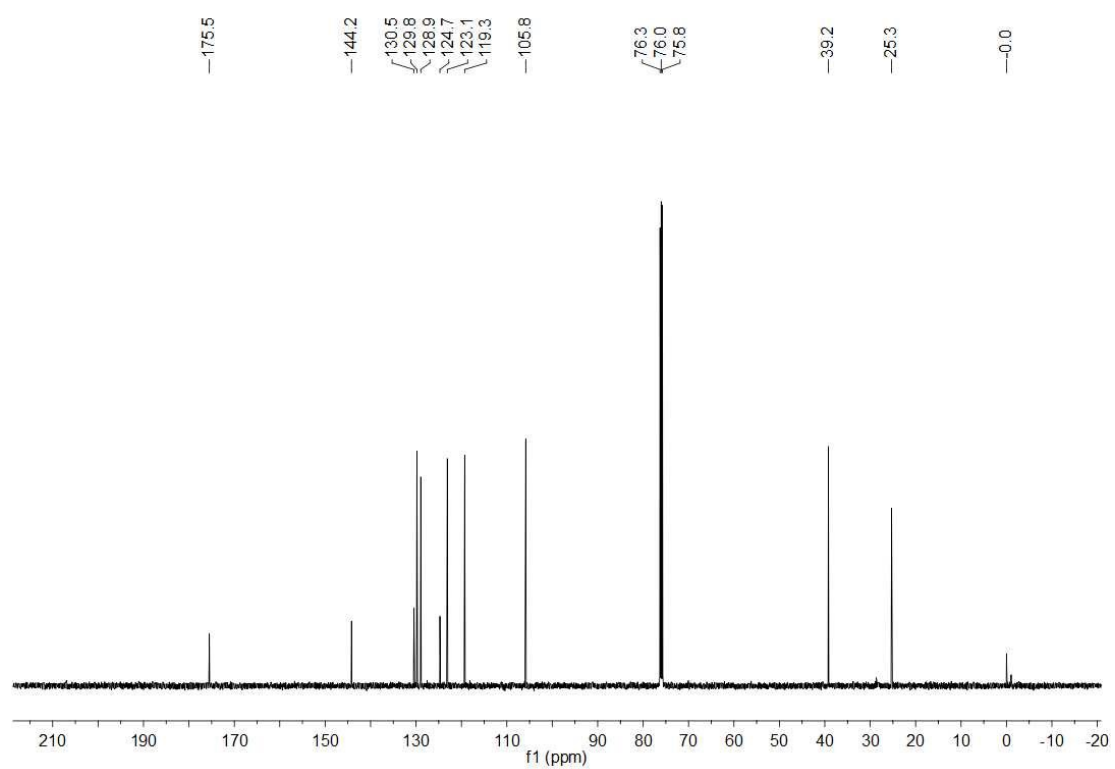



# <sup>1</sup>H NMR and <sup>13</sup>C NMR of **3aj**

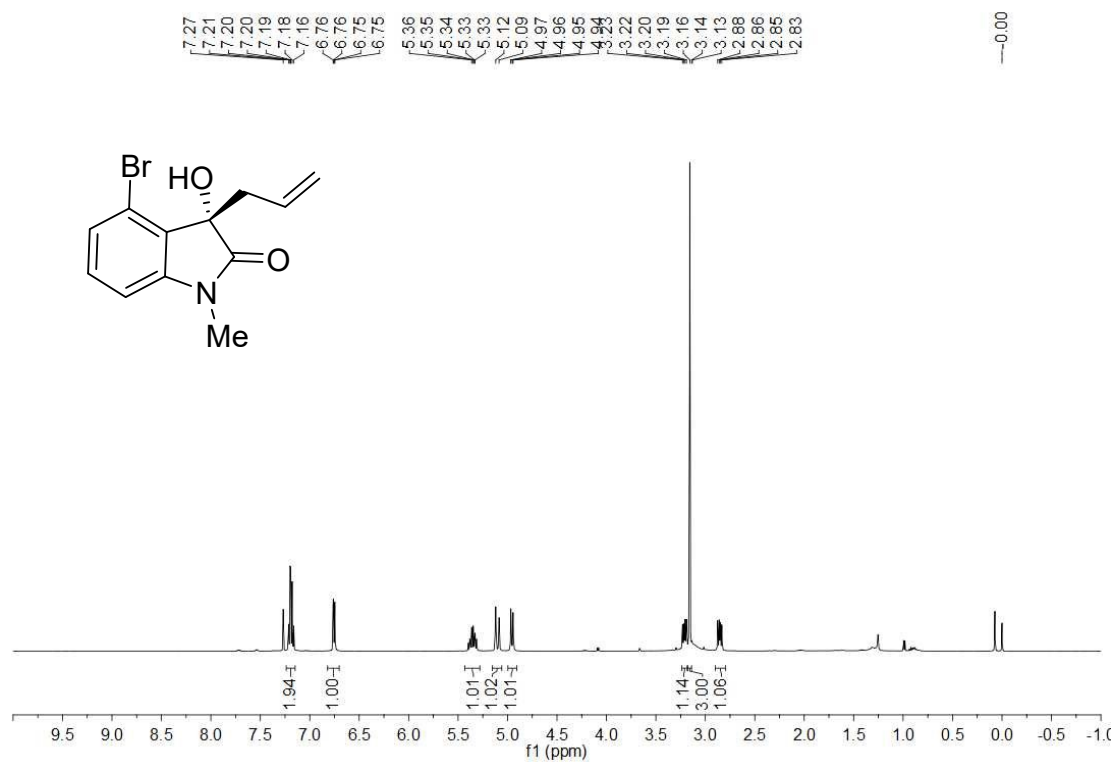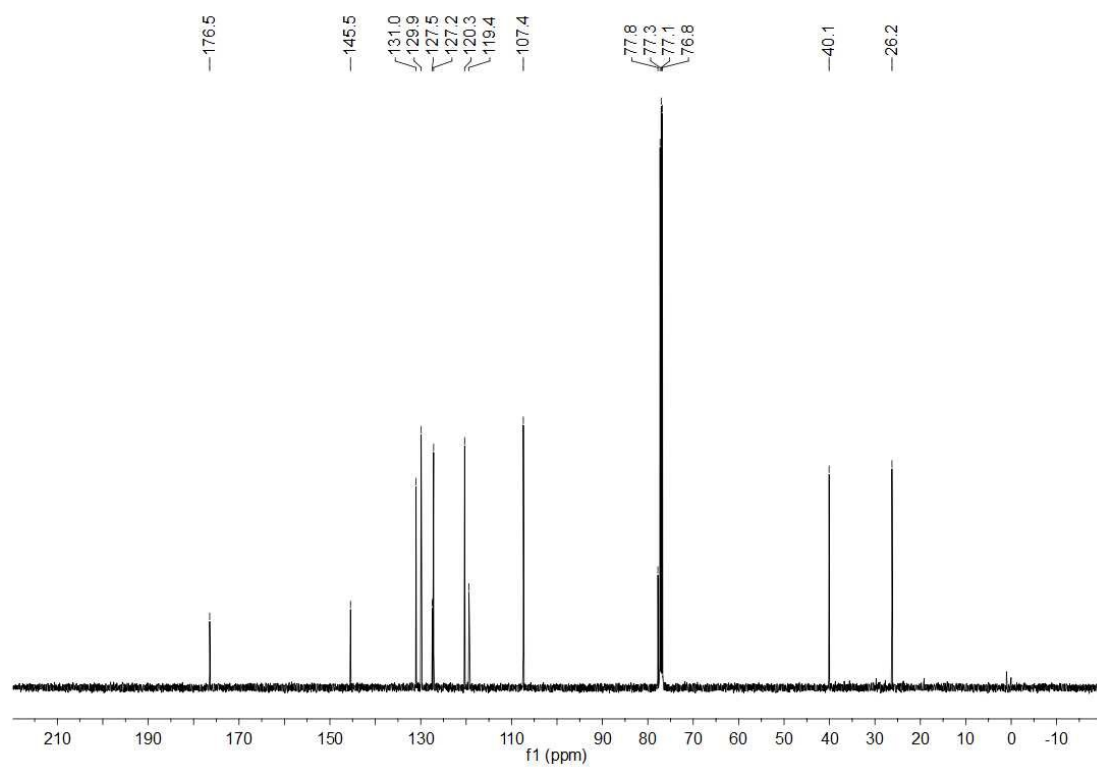

$^1\text{H}$  NMR and  $^{13}\text{C}$  NMR of **3ak**

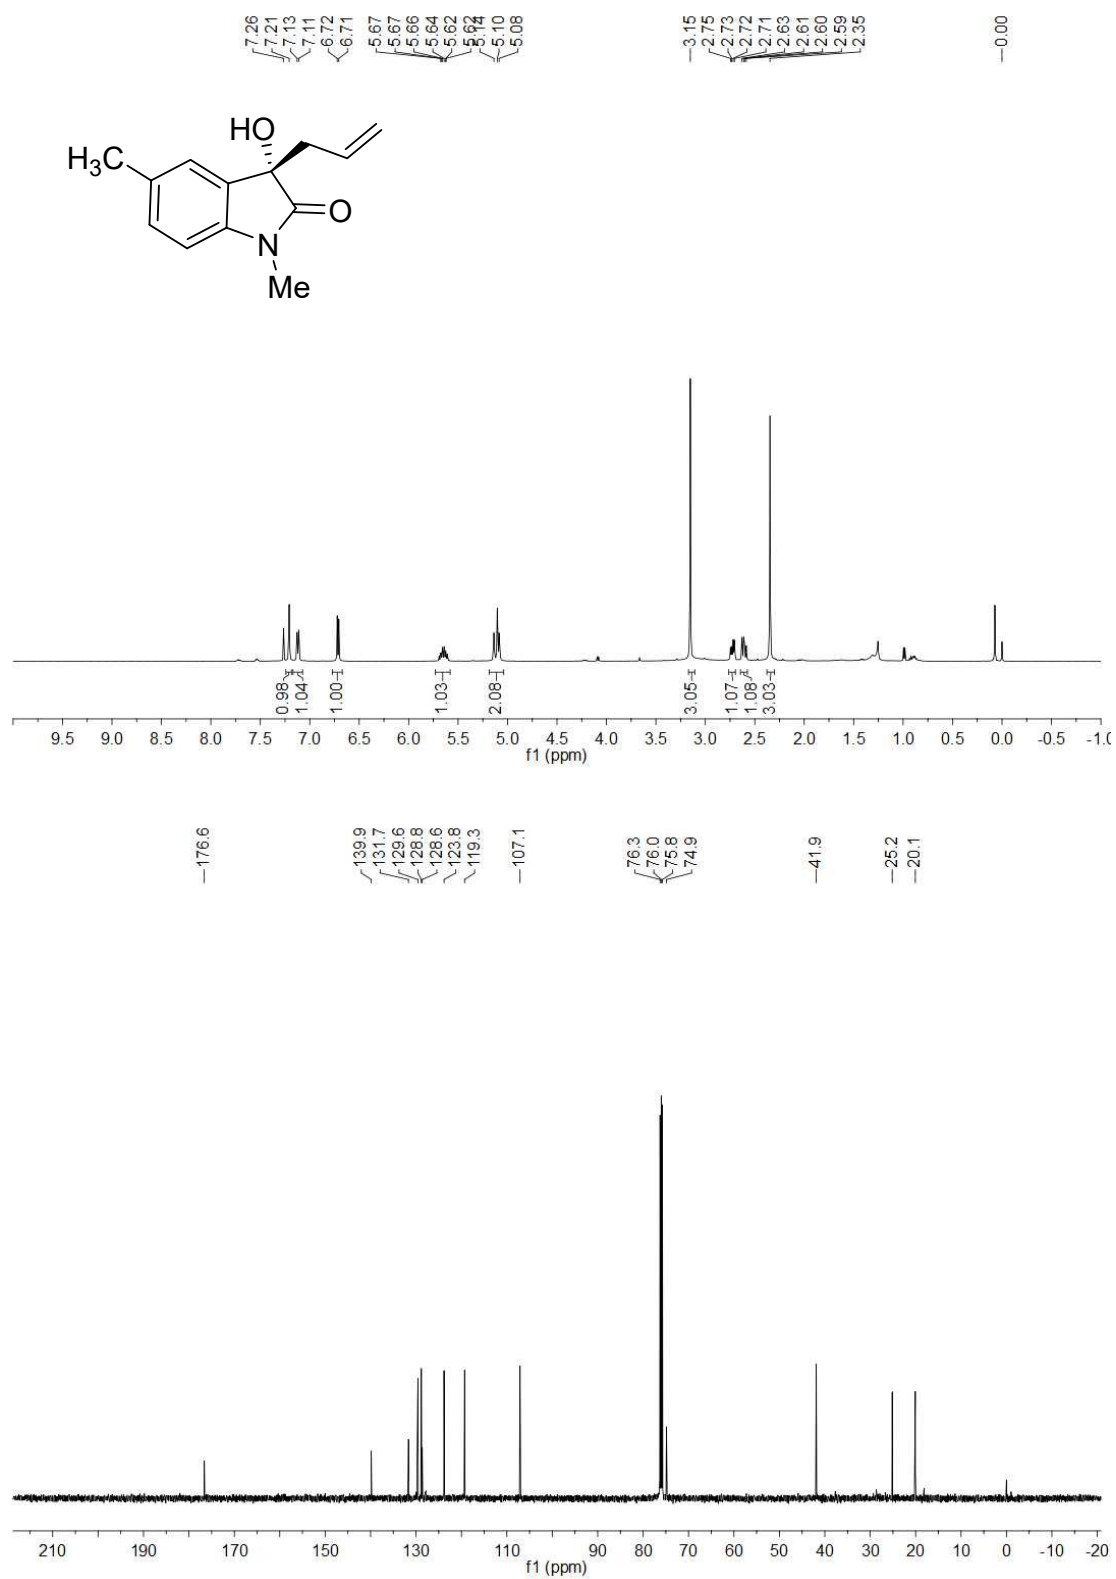

$^1\text{H}$  NMR and  $^{13}\text{C}$  NMR of **3al**

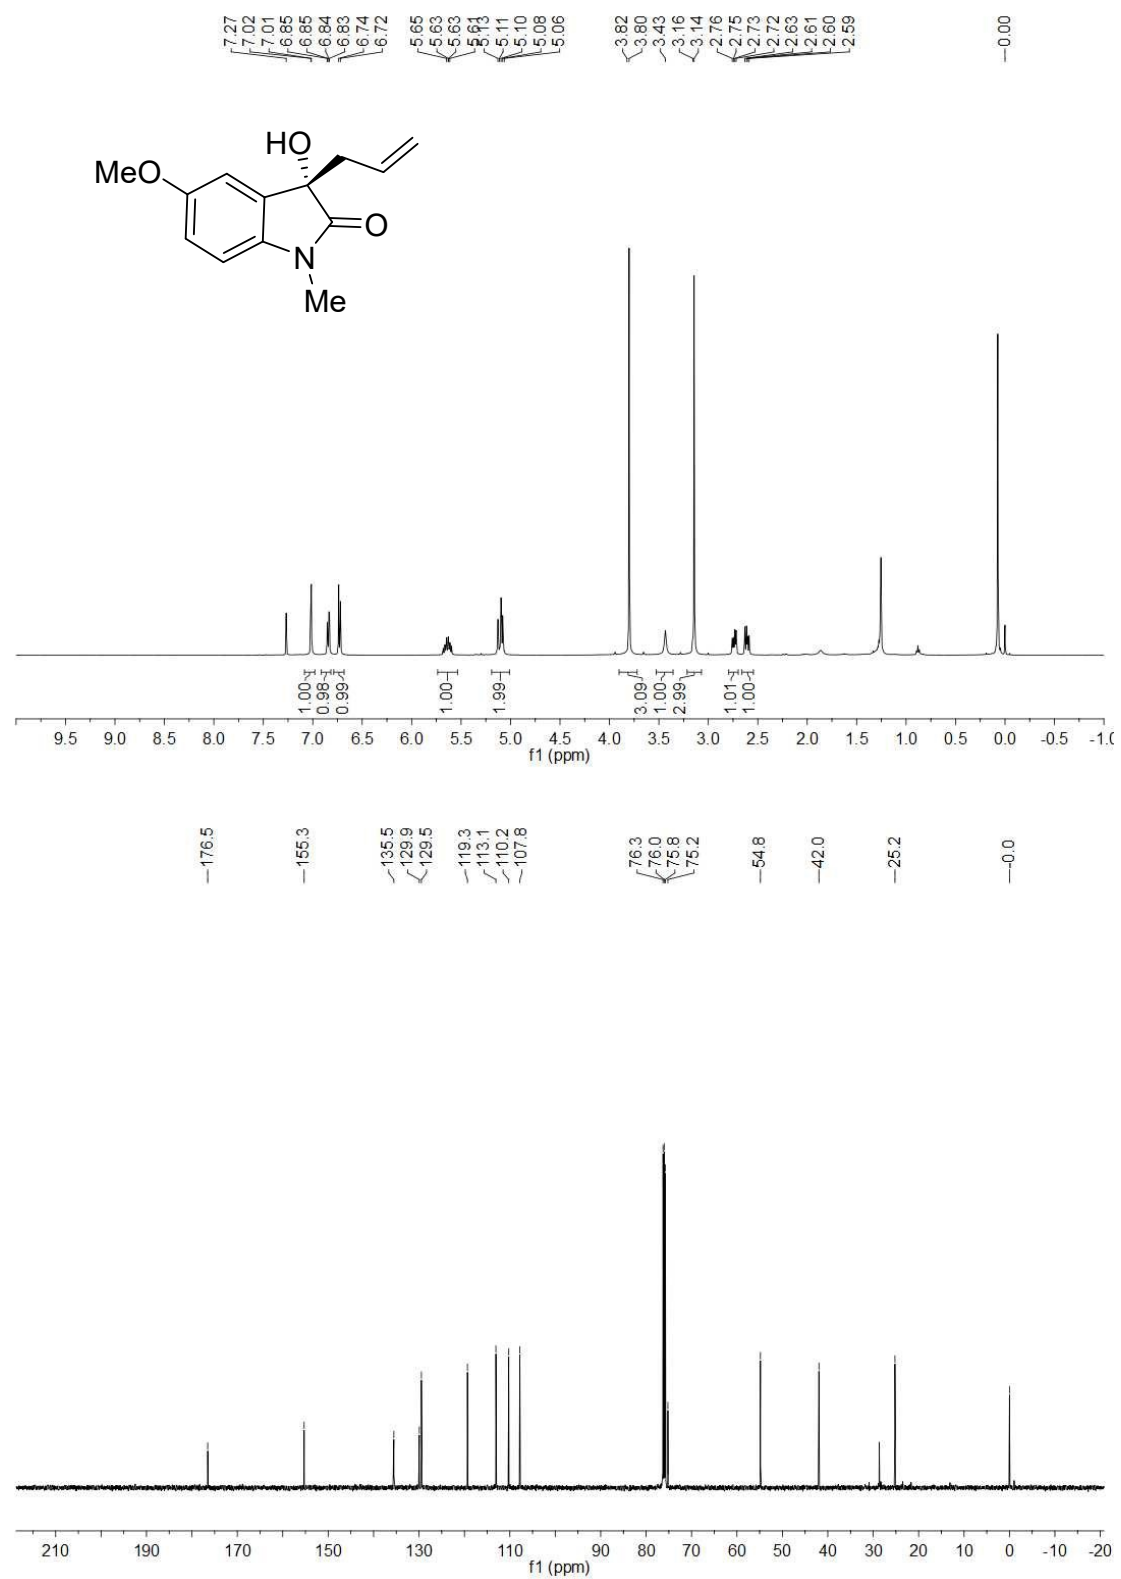

# $^1\text{H}$ NMR and $^{13}\text{C}$ NMR of **3am**

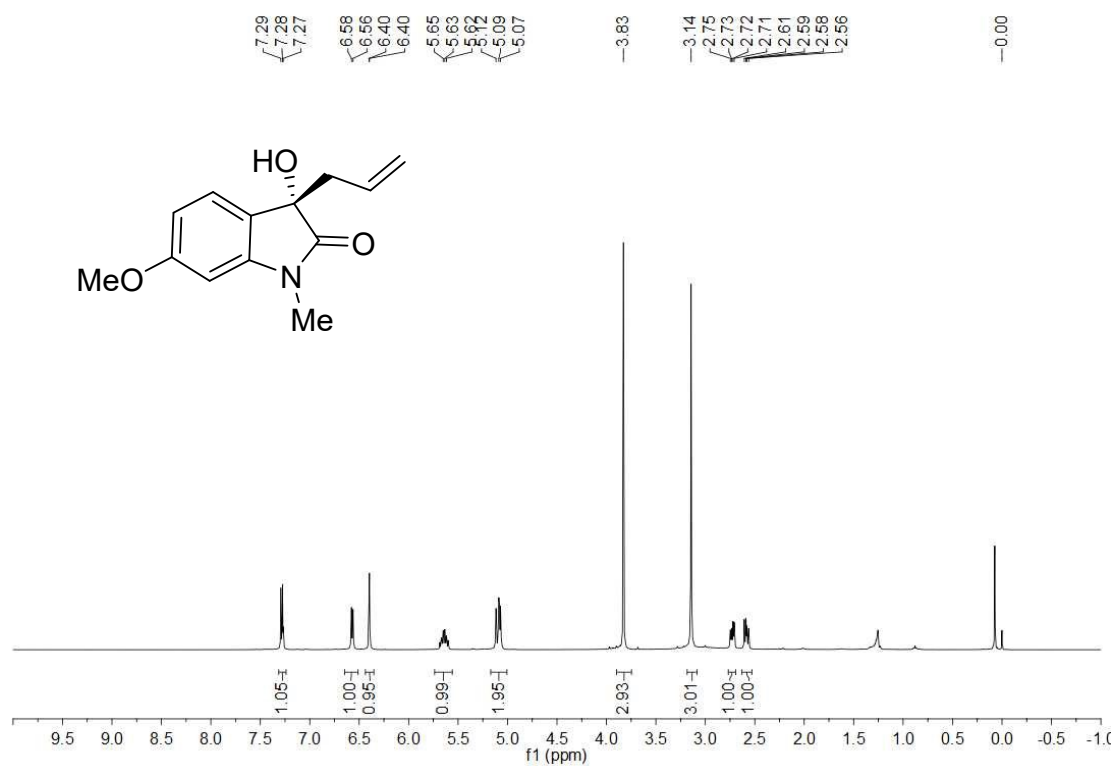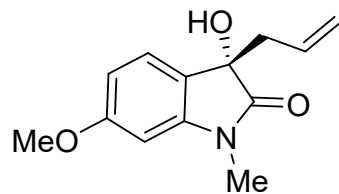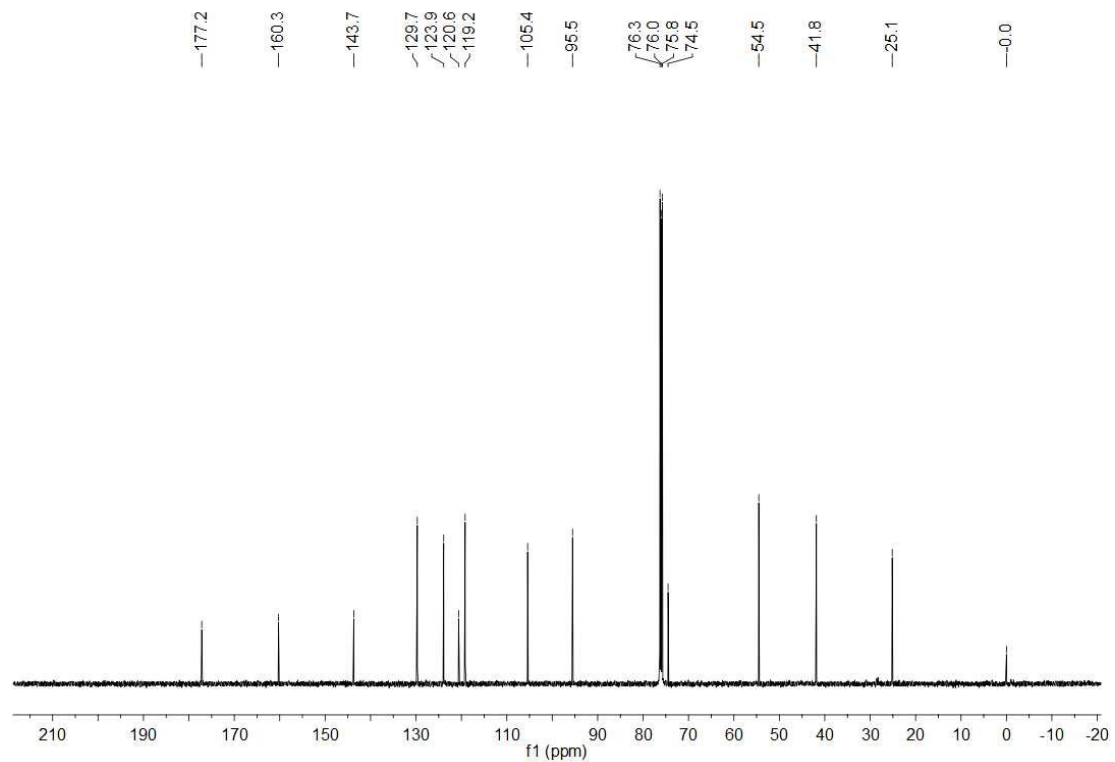

# $^1\text{H}$ NMR and $^{13}\text{C}$ NMR of **3an**

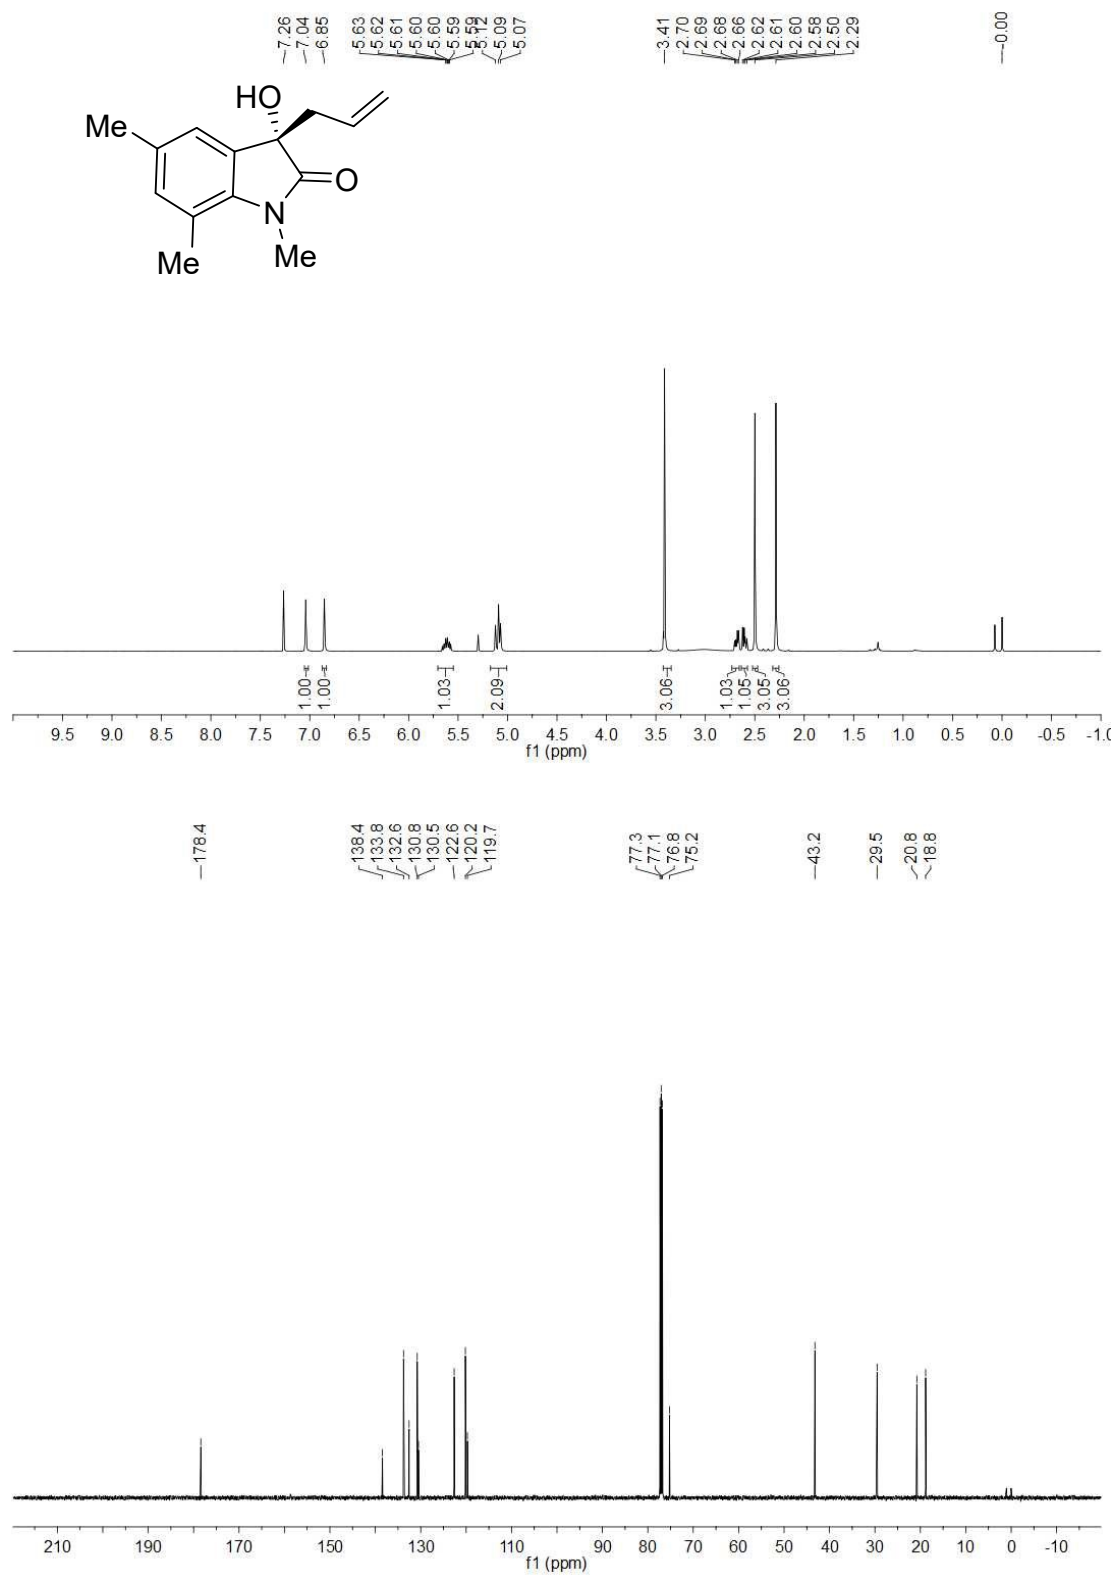

# $^1\text{H}$ NMR and $^{13}\text{C}$ NMR of **3ao**

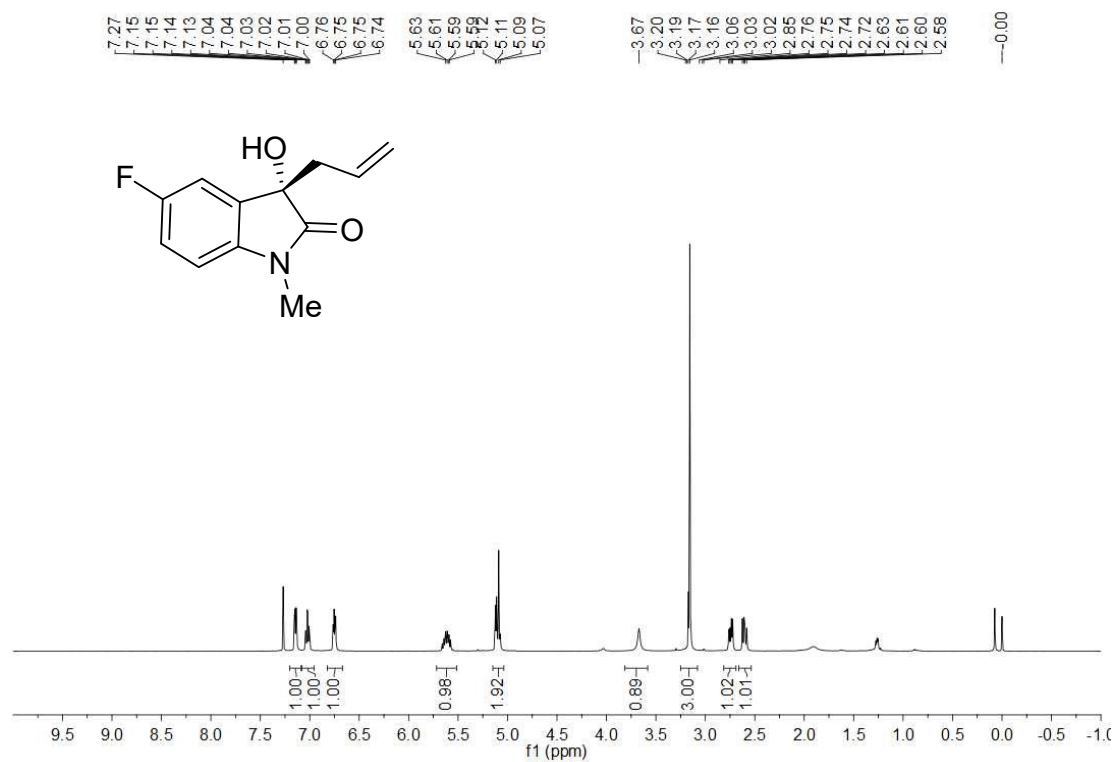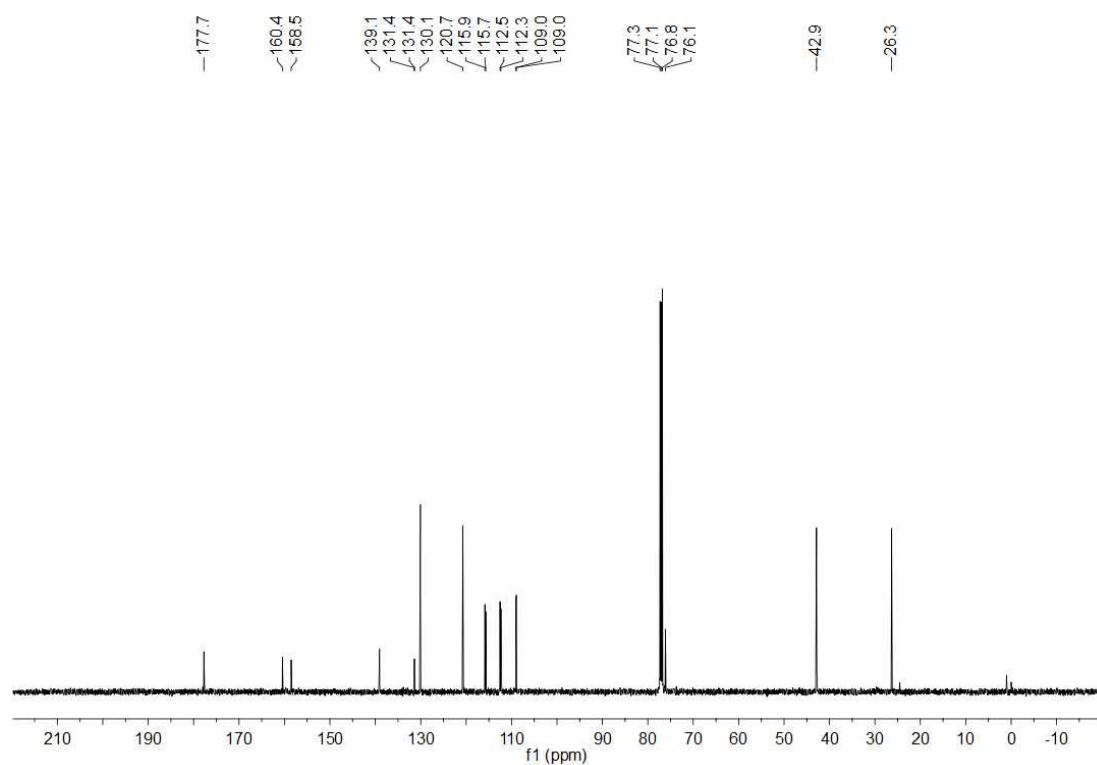

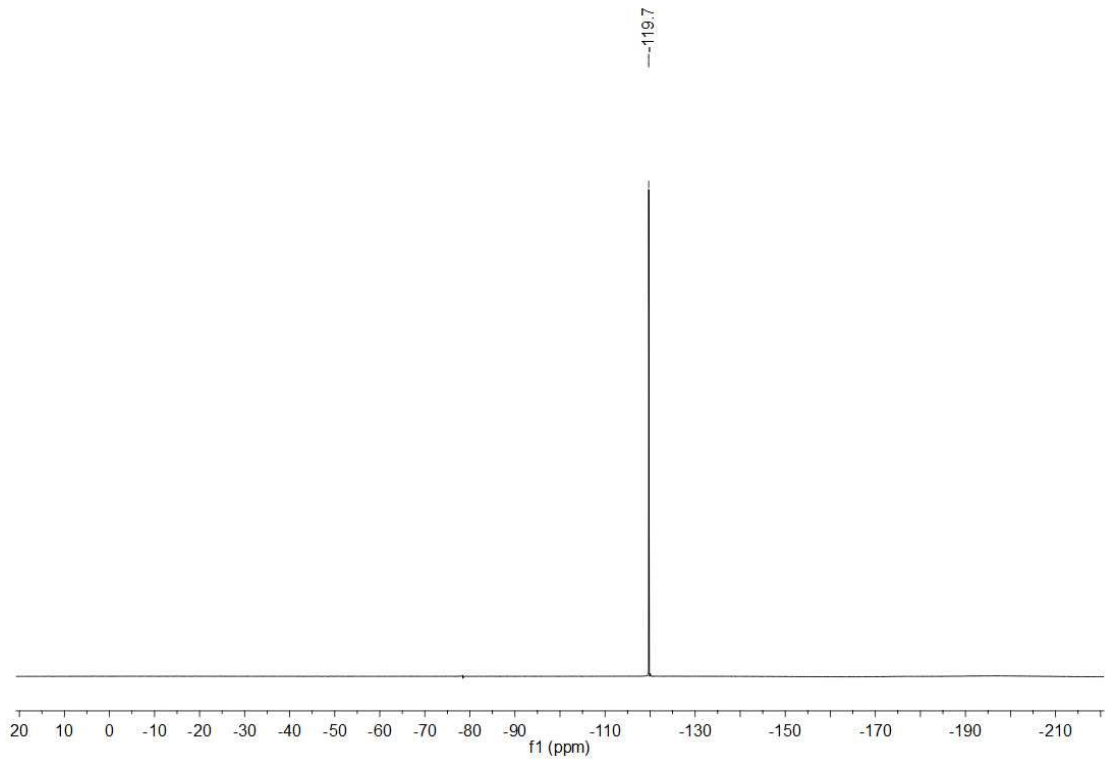

<sup>1</sup>H NMR and <sup>13</sup>C NMR of **3ap**

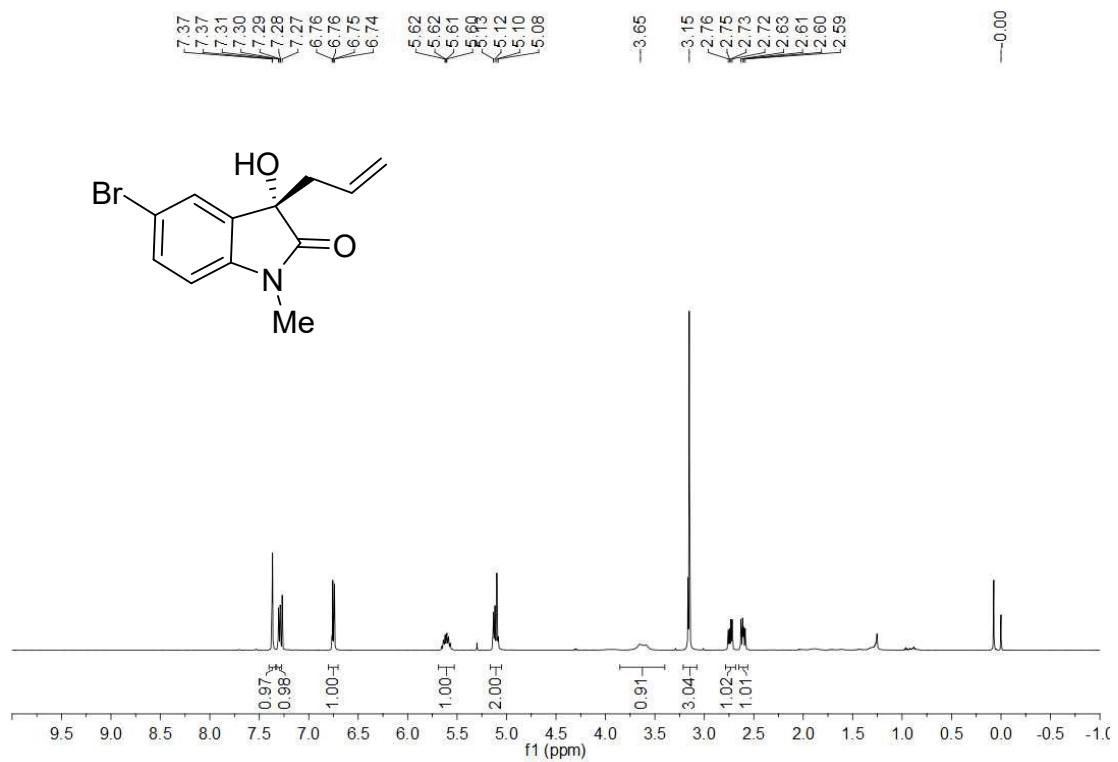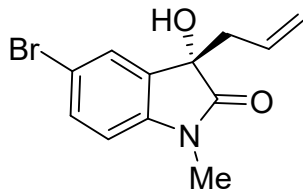

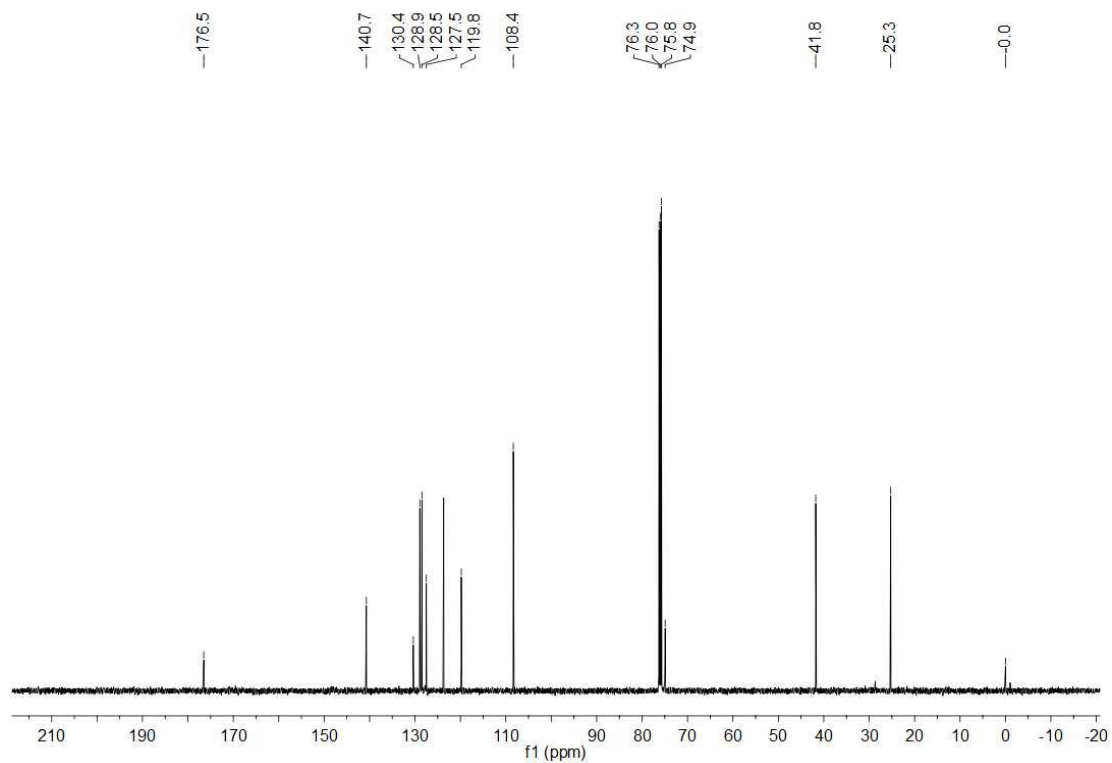

<sup>1</sup>H NMR, <sup>13</sup>C NMR and <sup>19</sup>F NMR of **3aq**

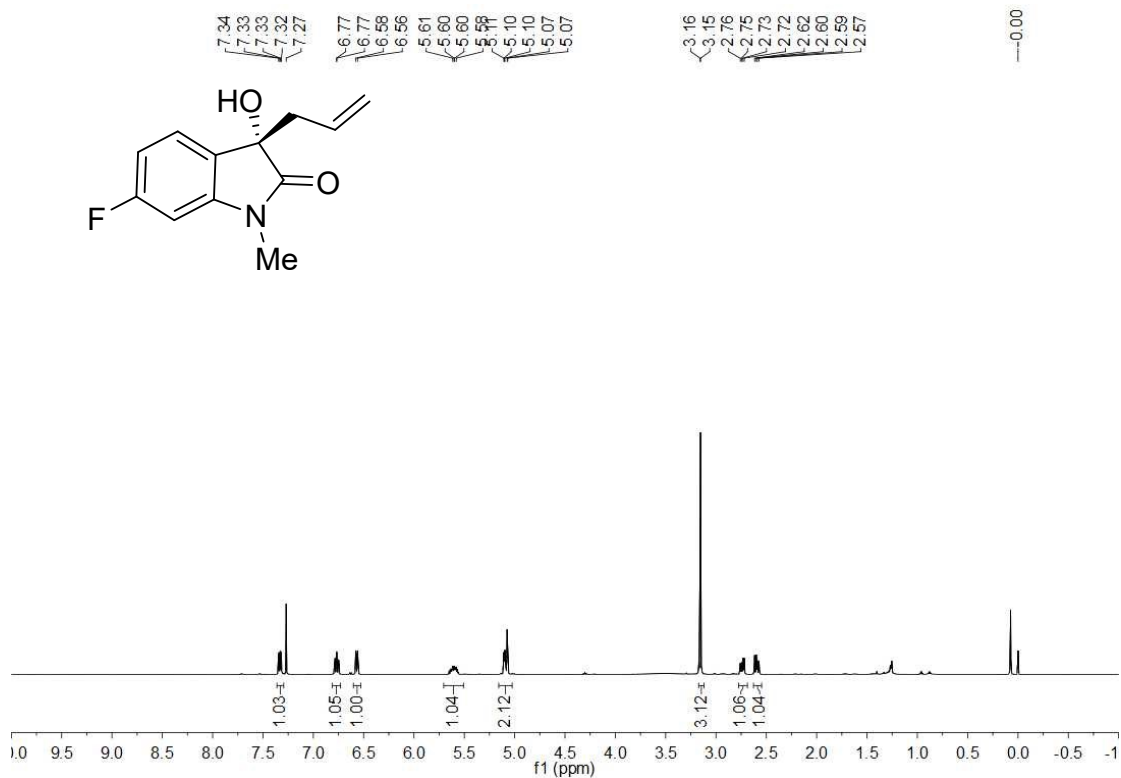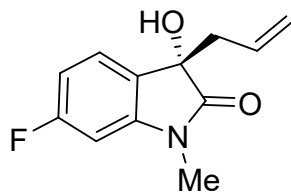



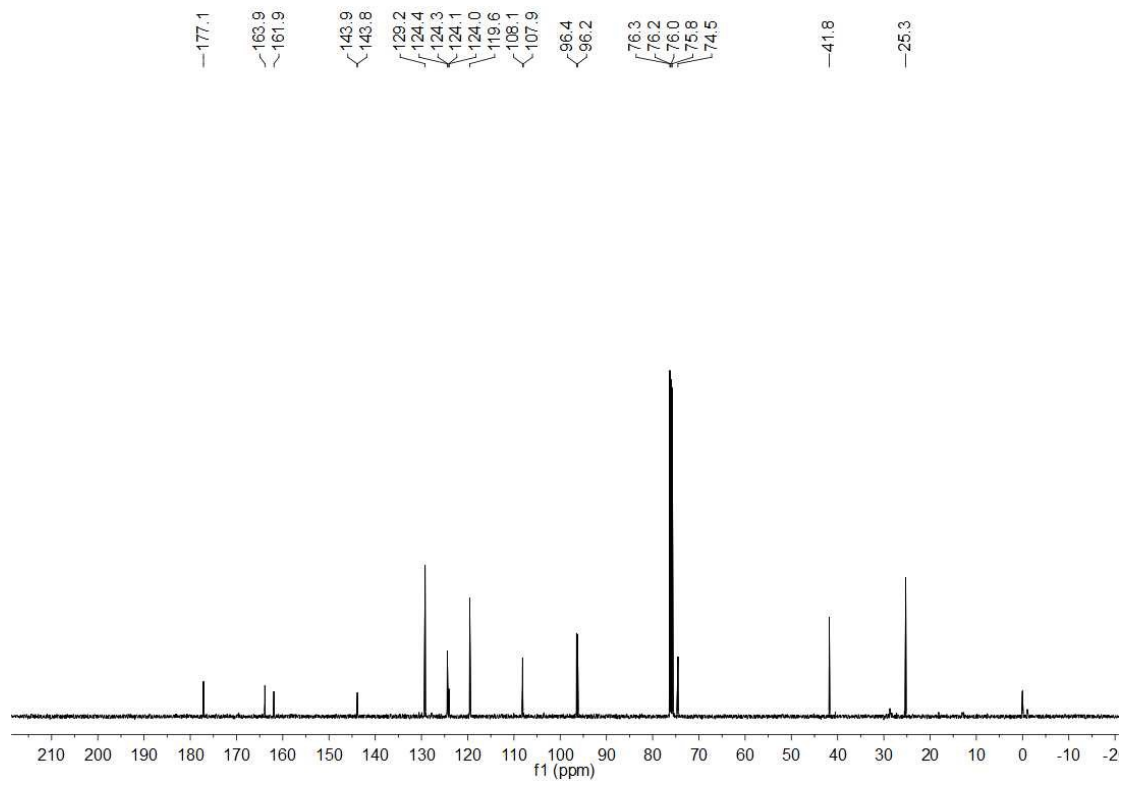

-109.88

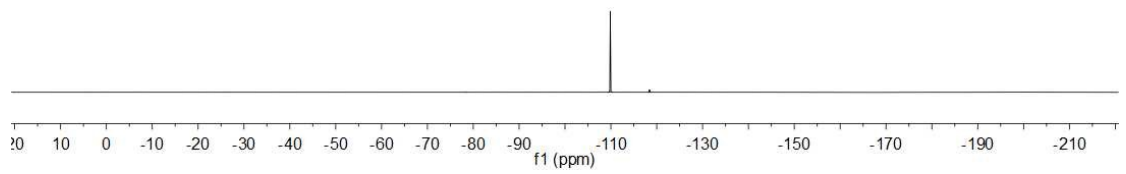

# $^1\text{H}$ NMR and $^{13}\text{C}$ NMR of **3ar**

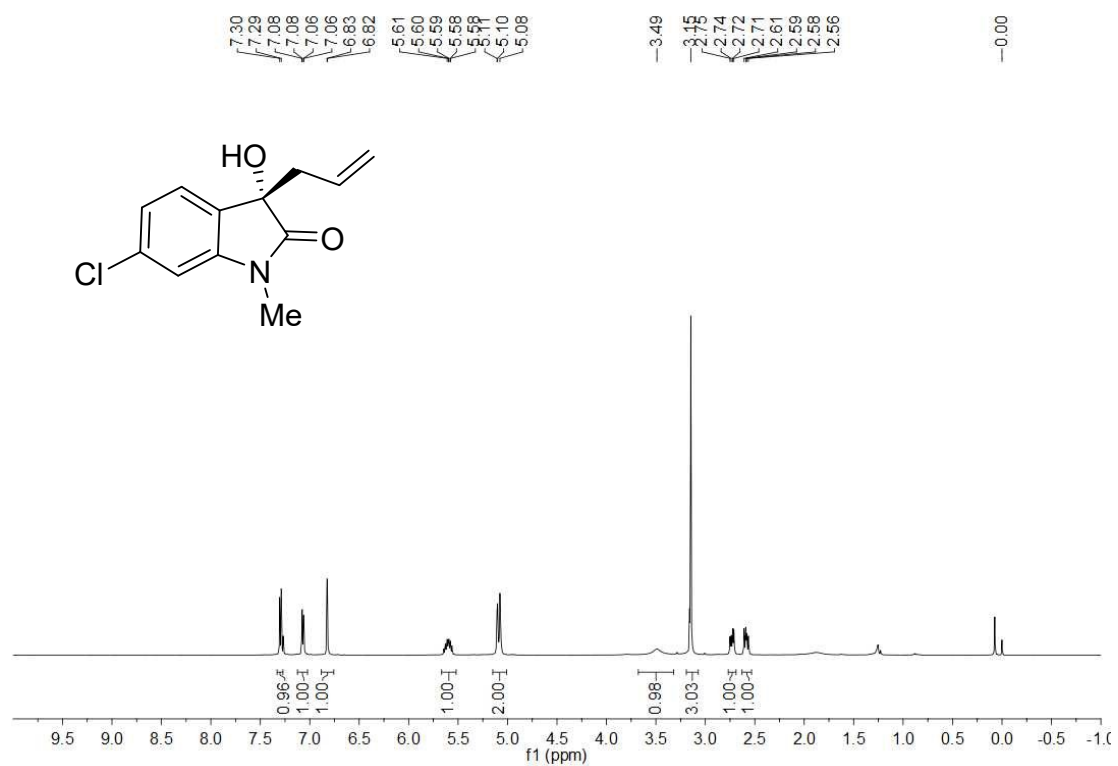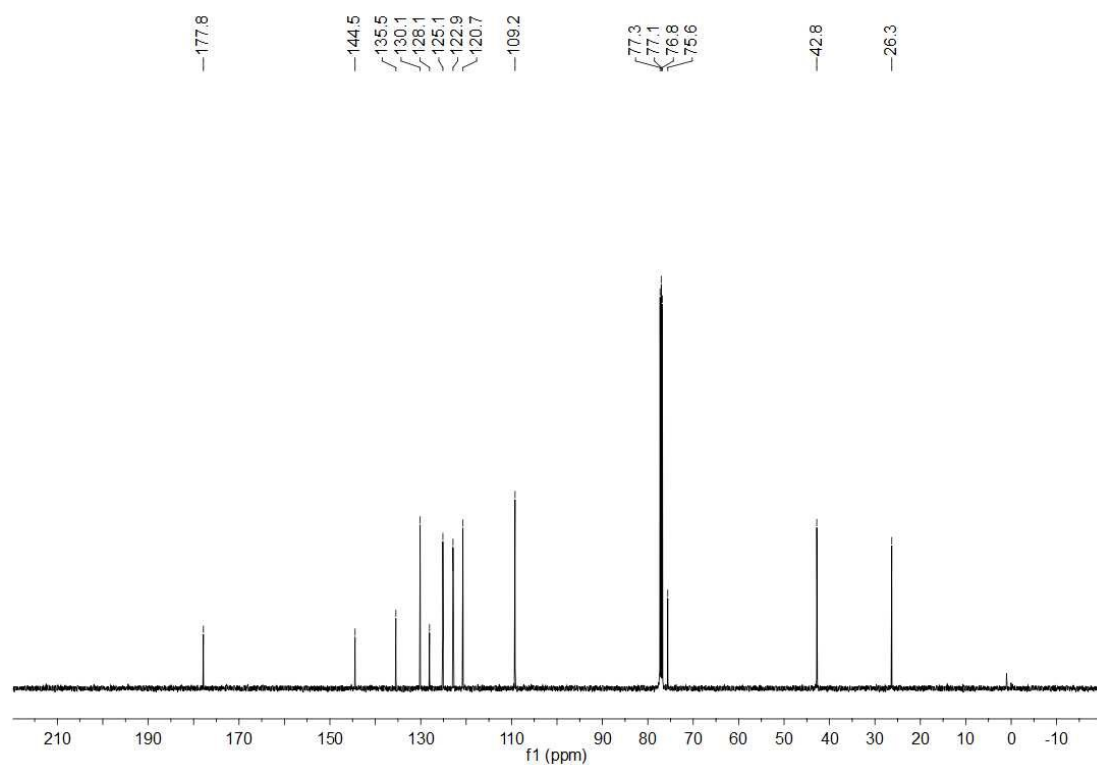

<sup>1</sup>H NMR and <sup>13</sup>C NMR of **3as**

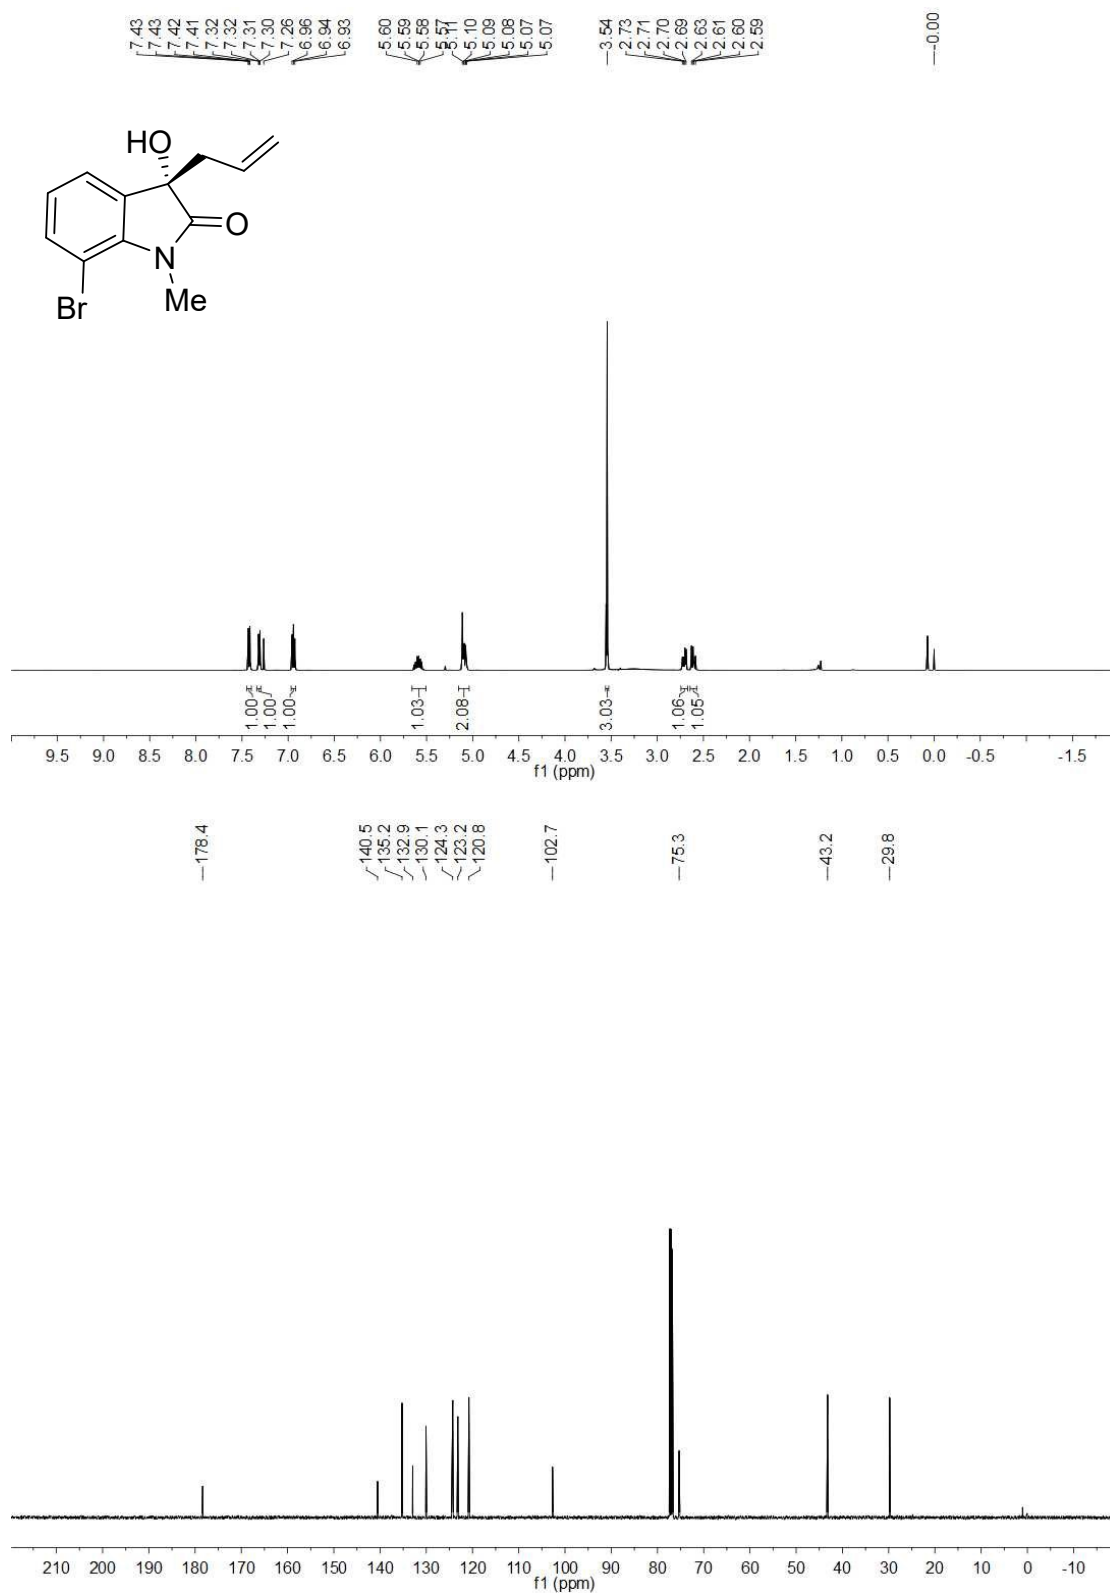

$^1\text{H}$  NMR,  $^{13}\text{C}$  NMR and  $^{19}\text{F}$  NMR of **3at**

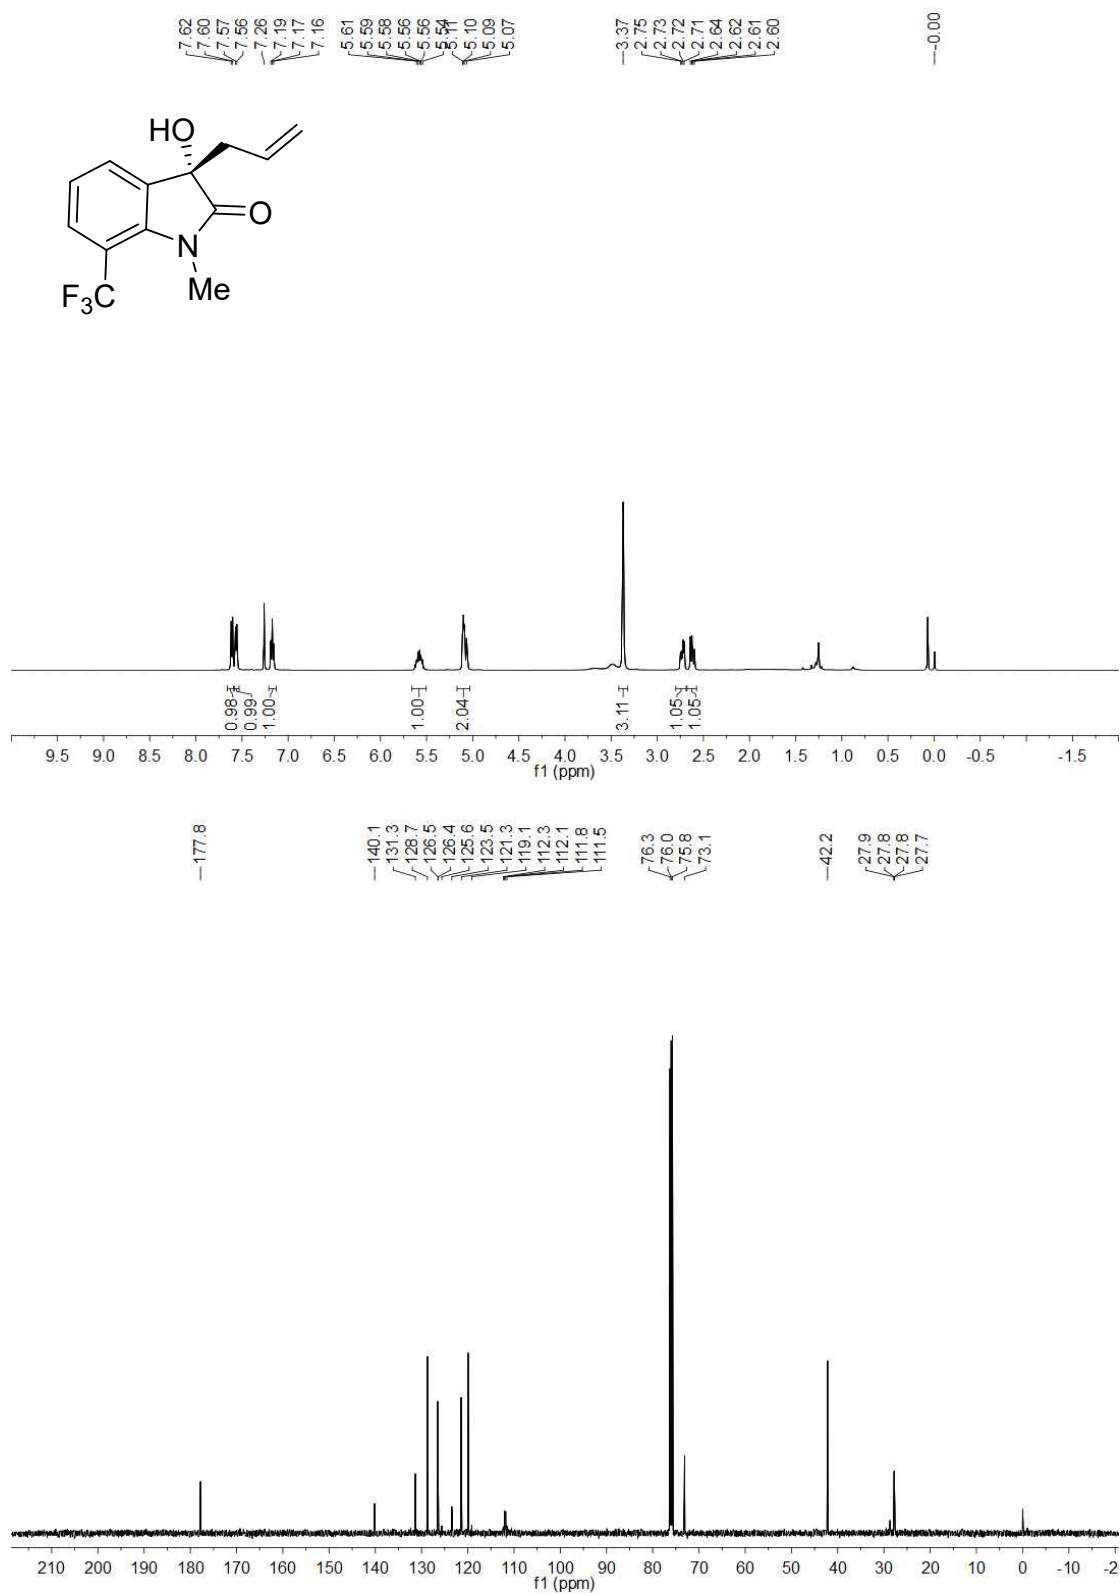

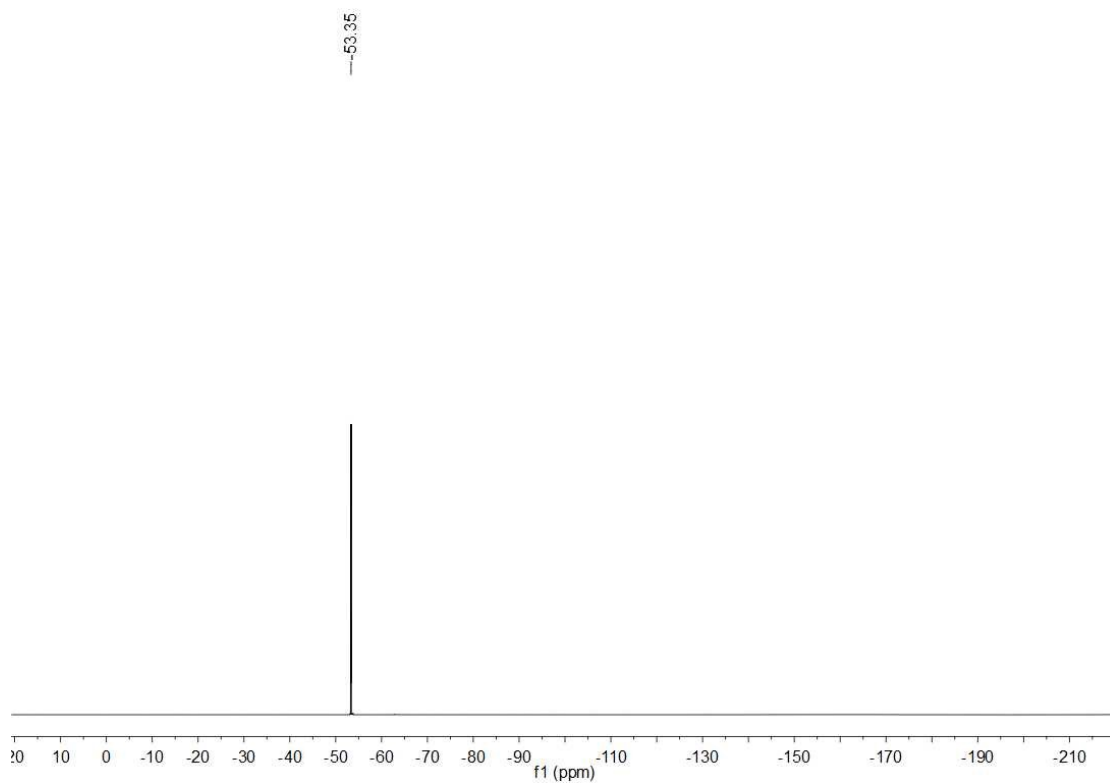

**<sup>1</sup>H NMR and <sup>13</sup>C NMR of 3au**

7.38  
7.38  
7.37  
7.37  
7.34  
7.34  
7.34  
7.34  
7.33  
7.33  
7.32  
7.32  
7.31  
7.31  
7.31  
7.27  
7.11  
7.11  
7.09  
7.08  
7.08  
7.06  
7.06  
6.83  
6.82  
6.80  
6.07  
5.63  
5.62  
5.26  
5.26  
5.25  
5.24  
5.24  
5.23  
5.21  
5.21  
5.20  
5.19  
5.19  
5.18  
5.18  
5.16  
5.16  
5.11  
5.11  
5.09  
5.09  
3.15  
3.15  
2.85  
2.76  
2.76  
1.03  
1.03  
1.02  
1.02  
0.78  
0.78  
0.00

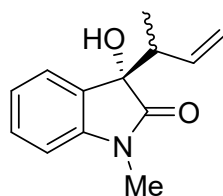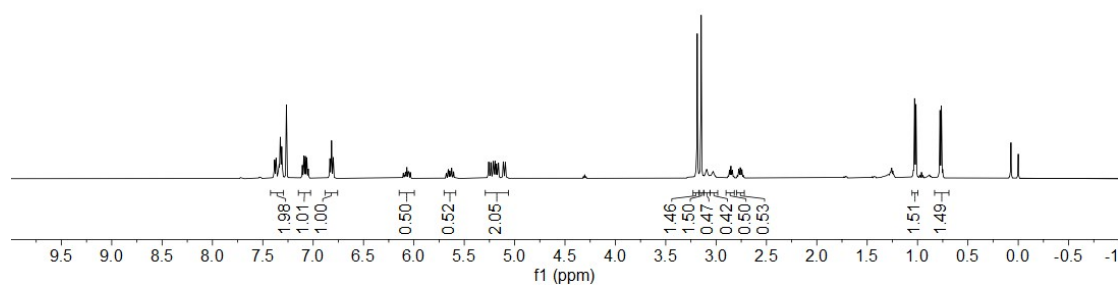

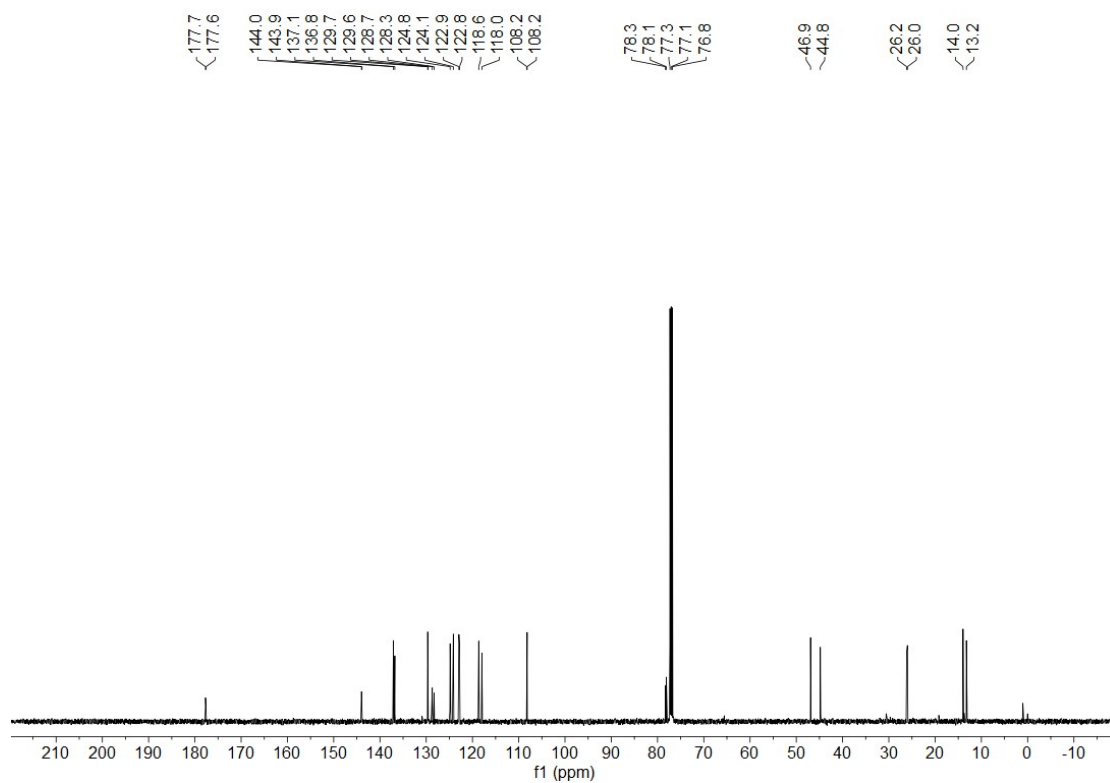

<sup>1</sup>H NMR of the crude product **3au**

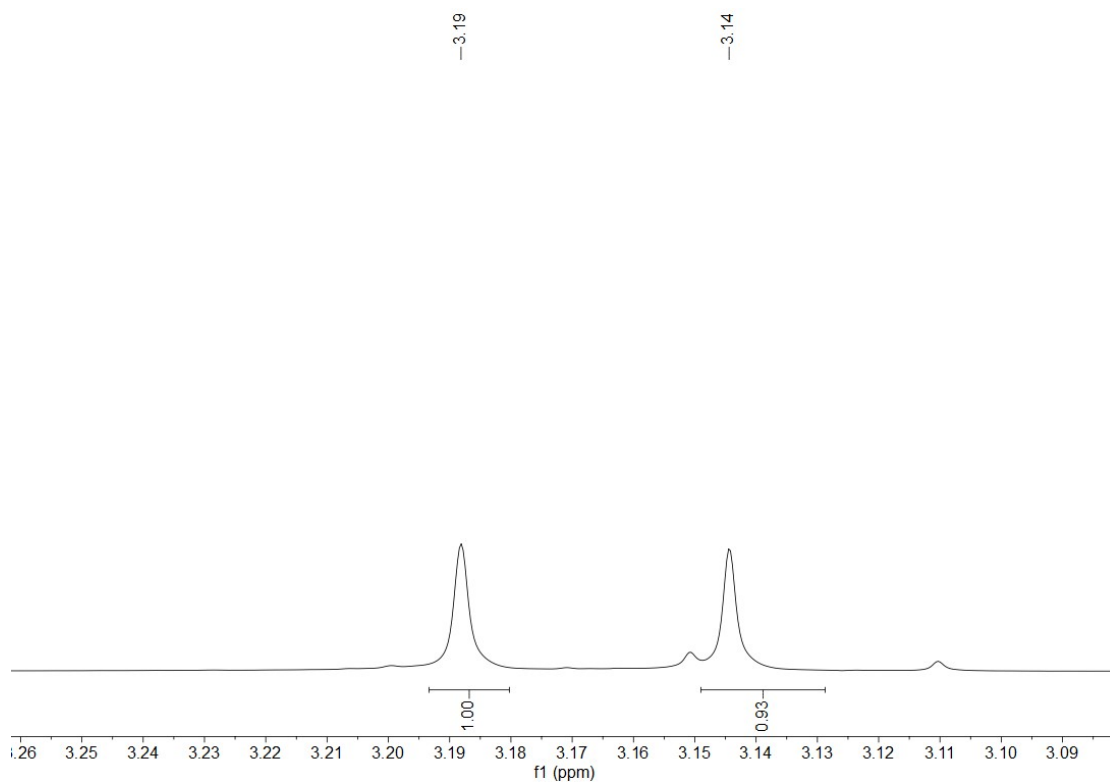

# <sup>1</sup>H NMR and <sup>13</sup>C NMR of **3av**

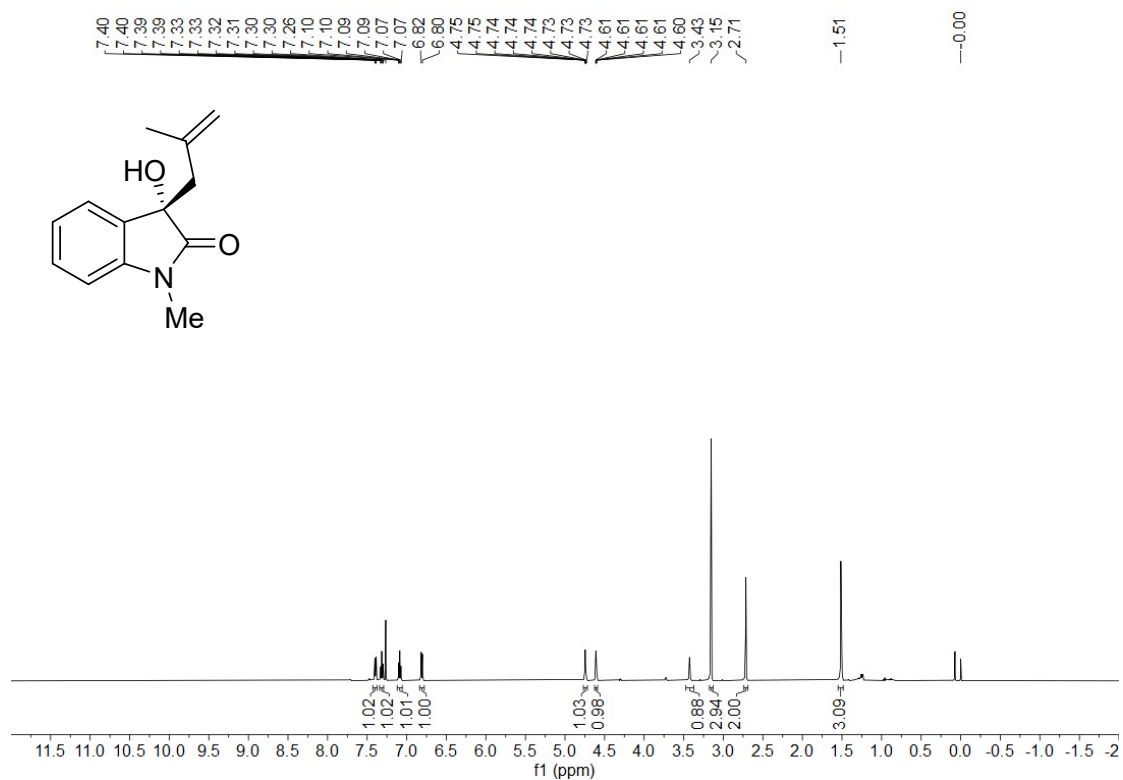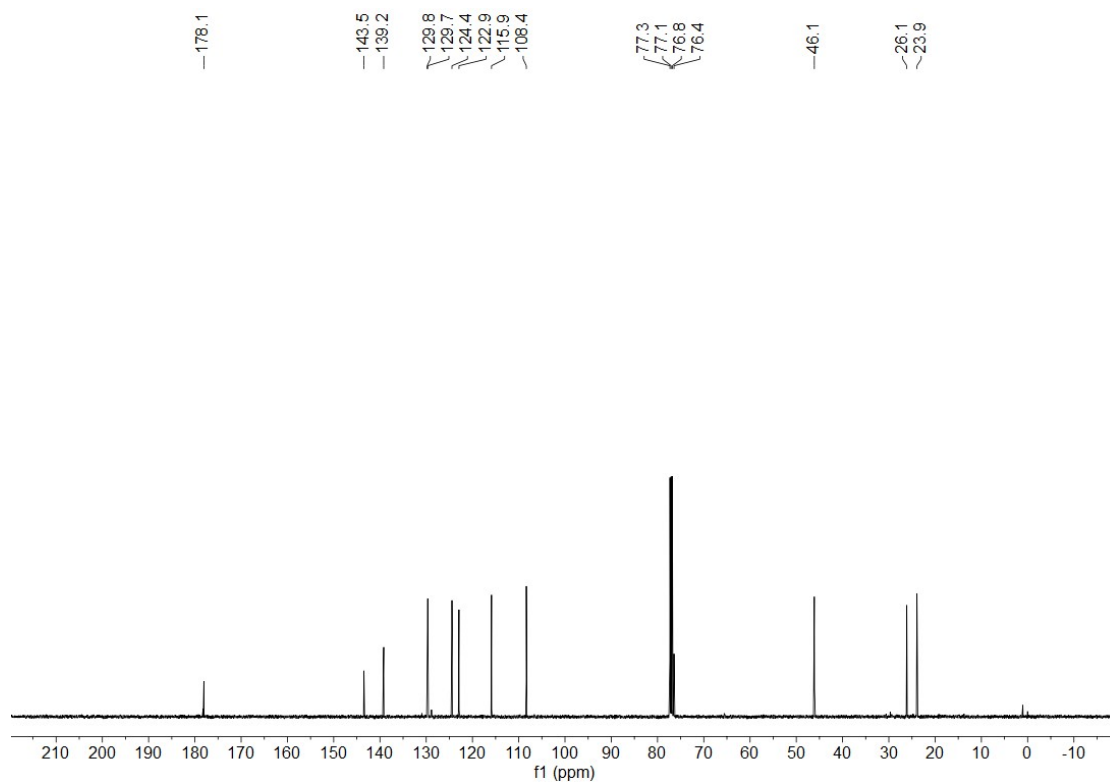

# <sup>1</sup>H NMR and <sup>13</sup>C NMR of **3ba**

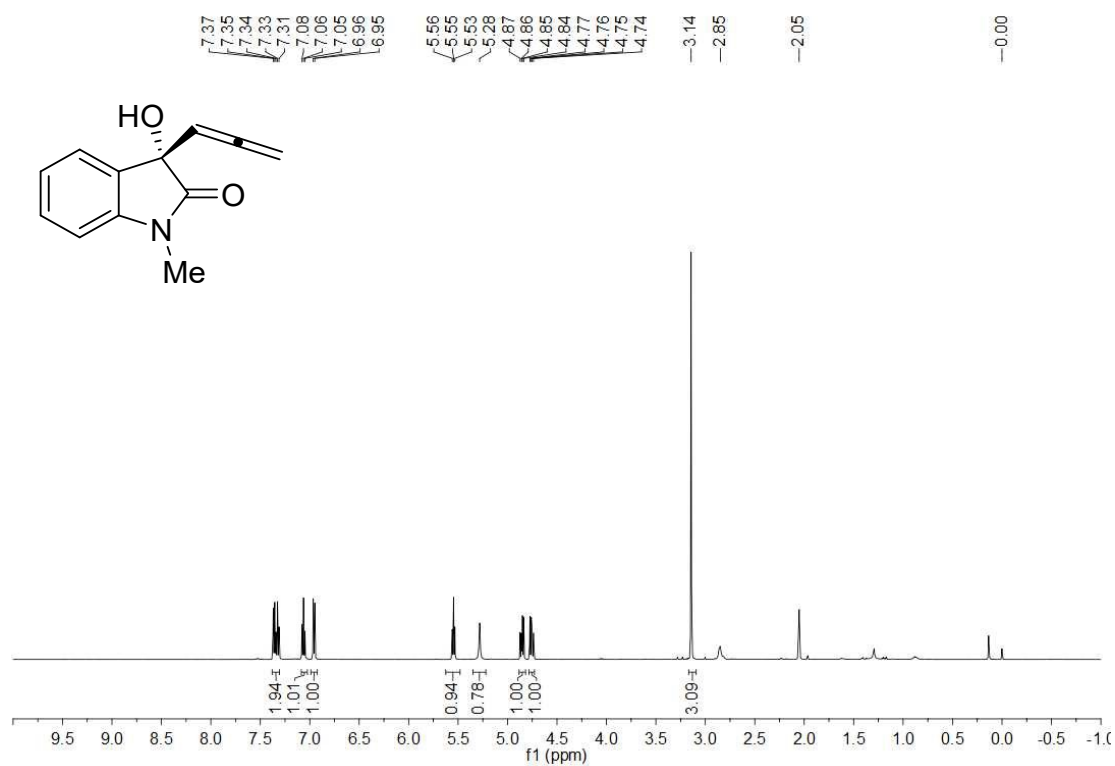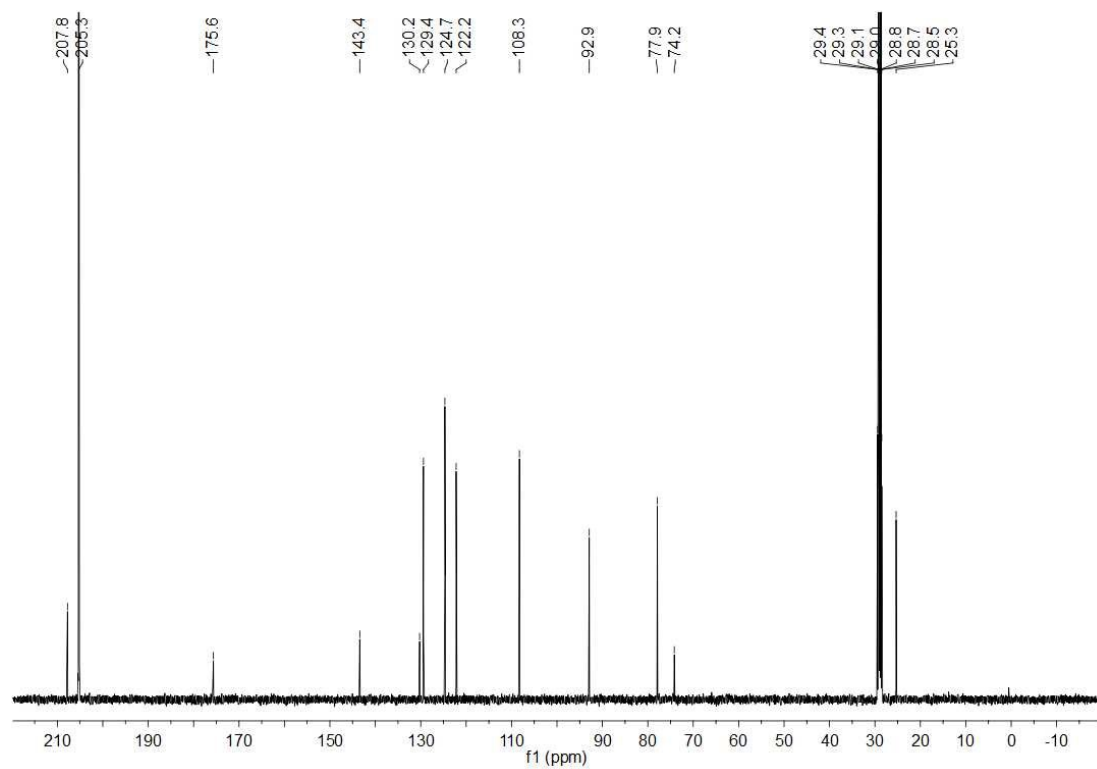



<sup>1</sup>H NMR and <sup>13</sup>C NMR of **3bb**

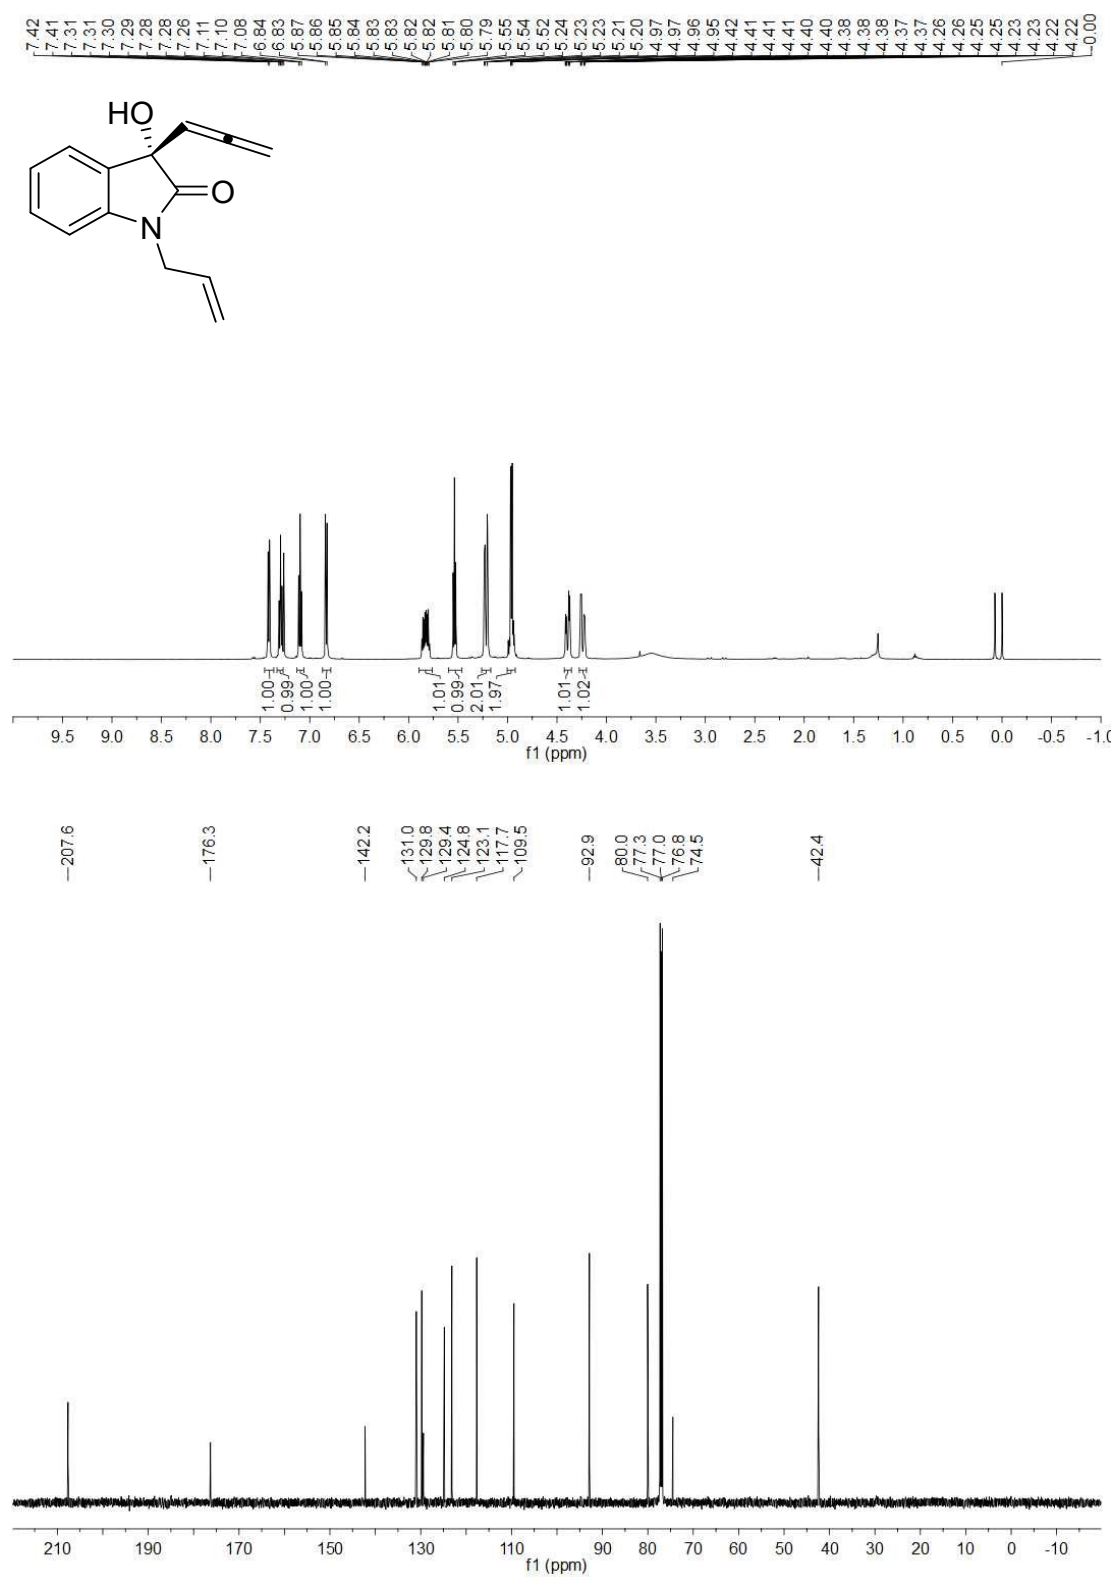

# $^1\text{H}$ NMR and $^{13}\text{C}$ NMR of **3bc**

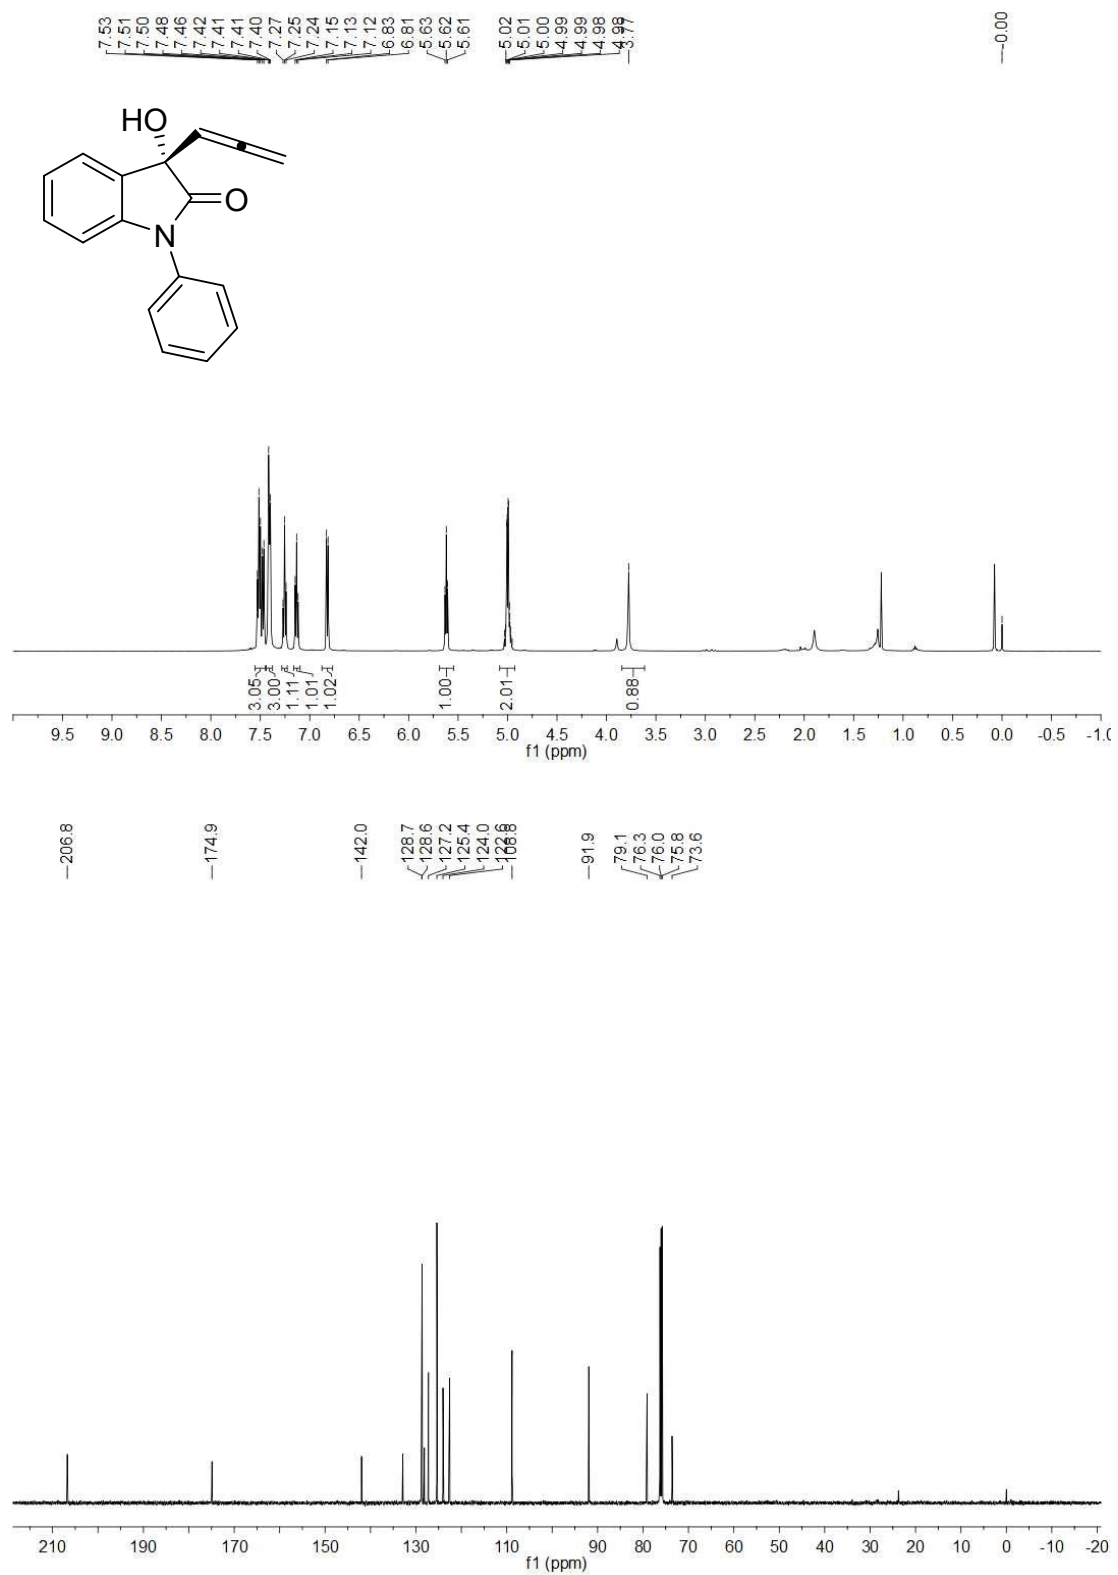

# <sup>1</sup>H NMR and <sup>13</sup>C NMR of **3bd**

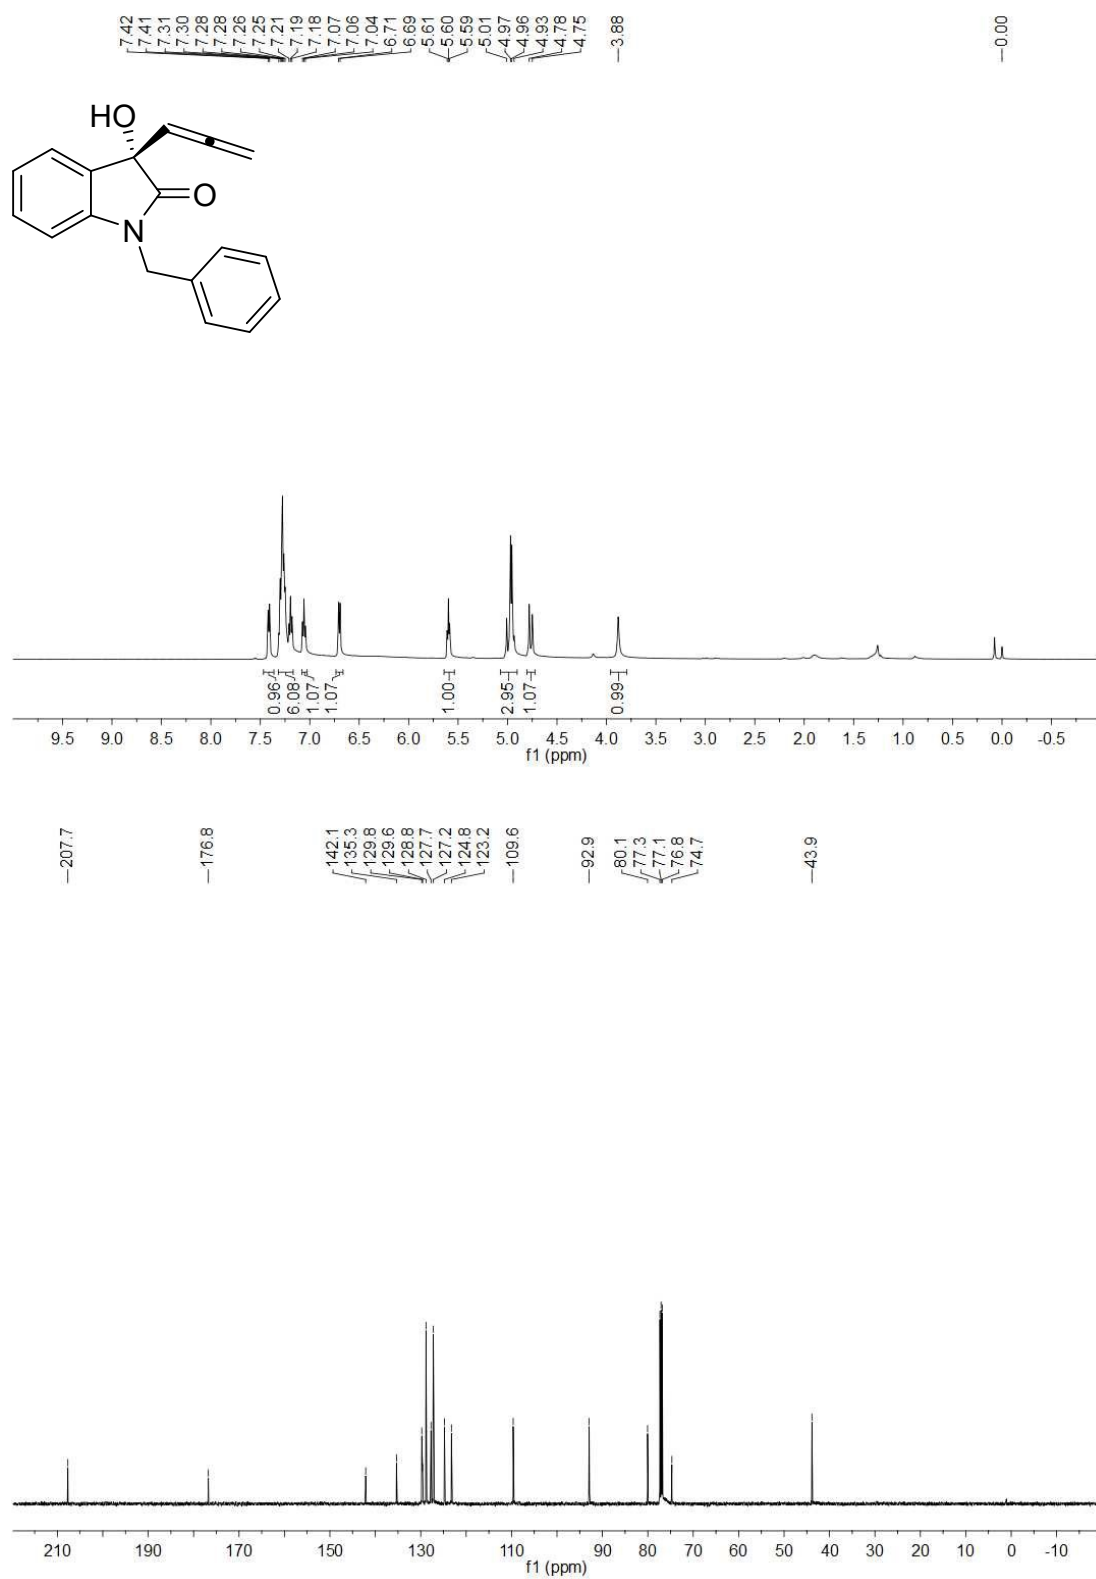

$^1\text{H}$  NMR and  $^{13}\text{C}$  NMR of **3be**

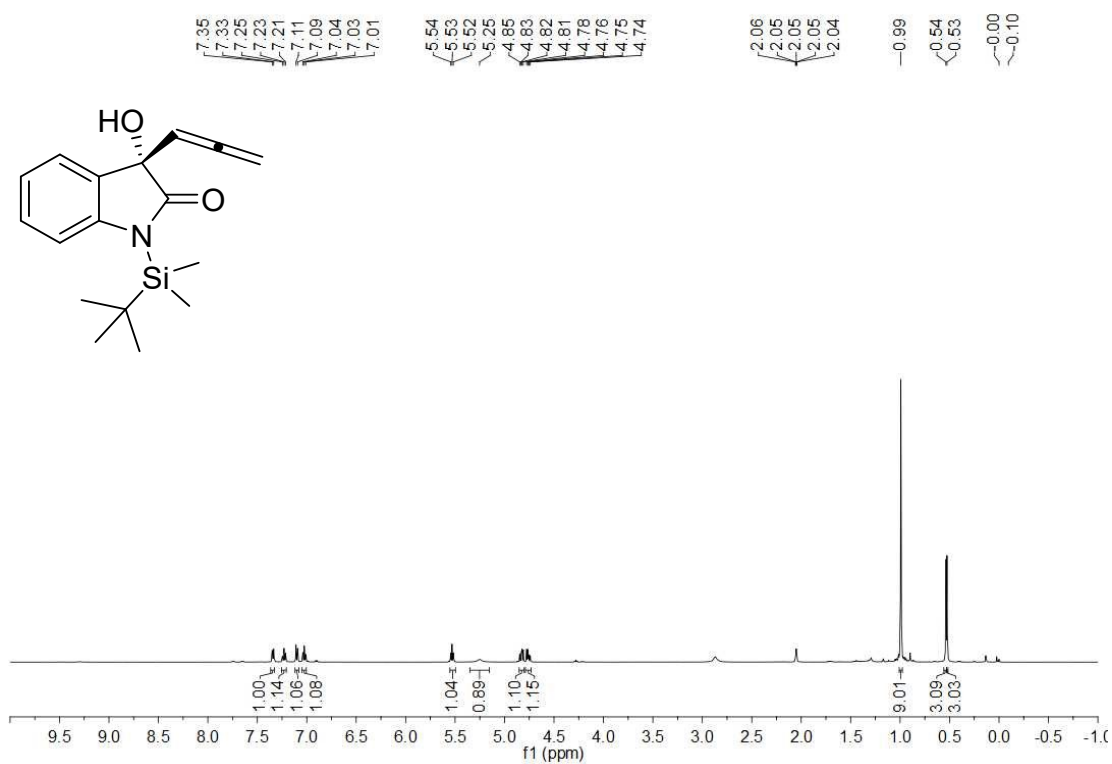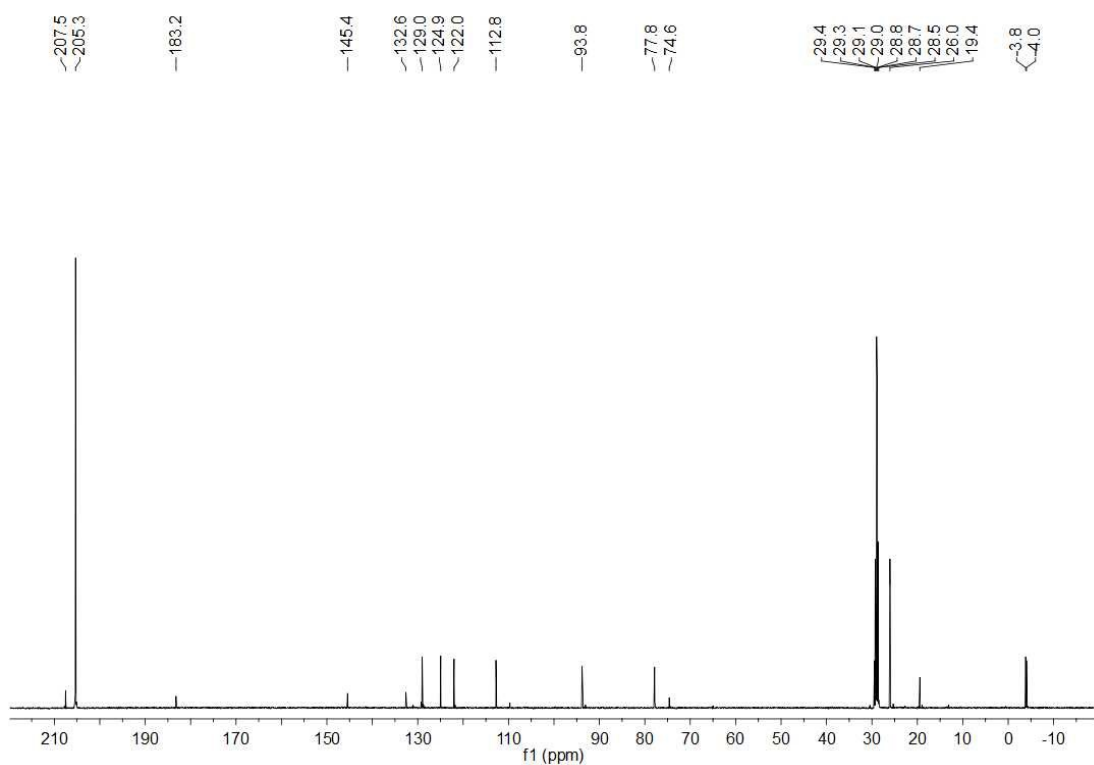

<sup>1</sup>H NMR and <sup>13</sup>C NMR of **3bf**

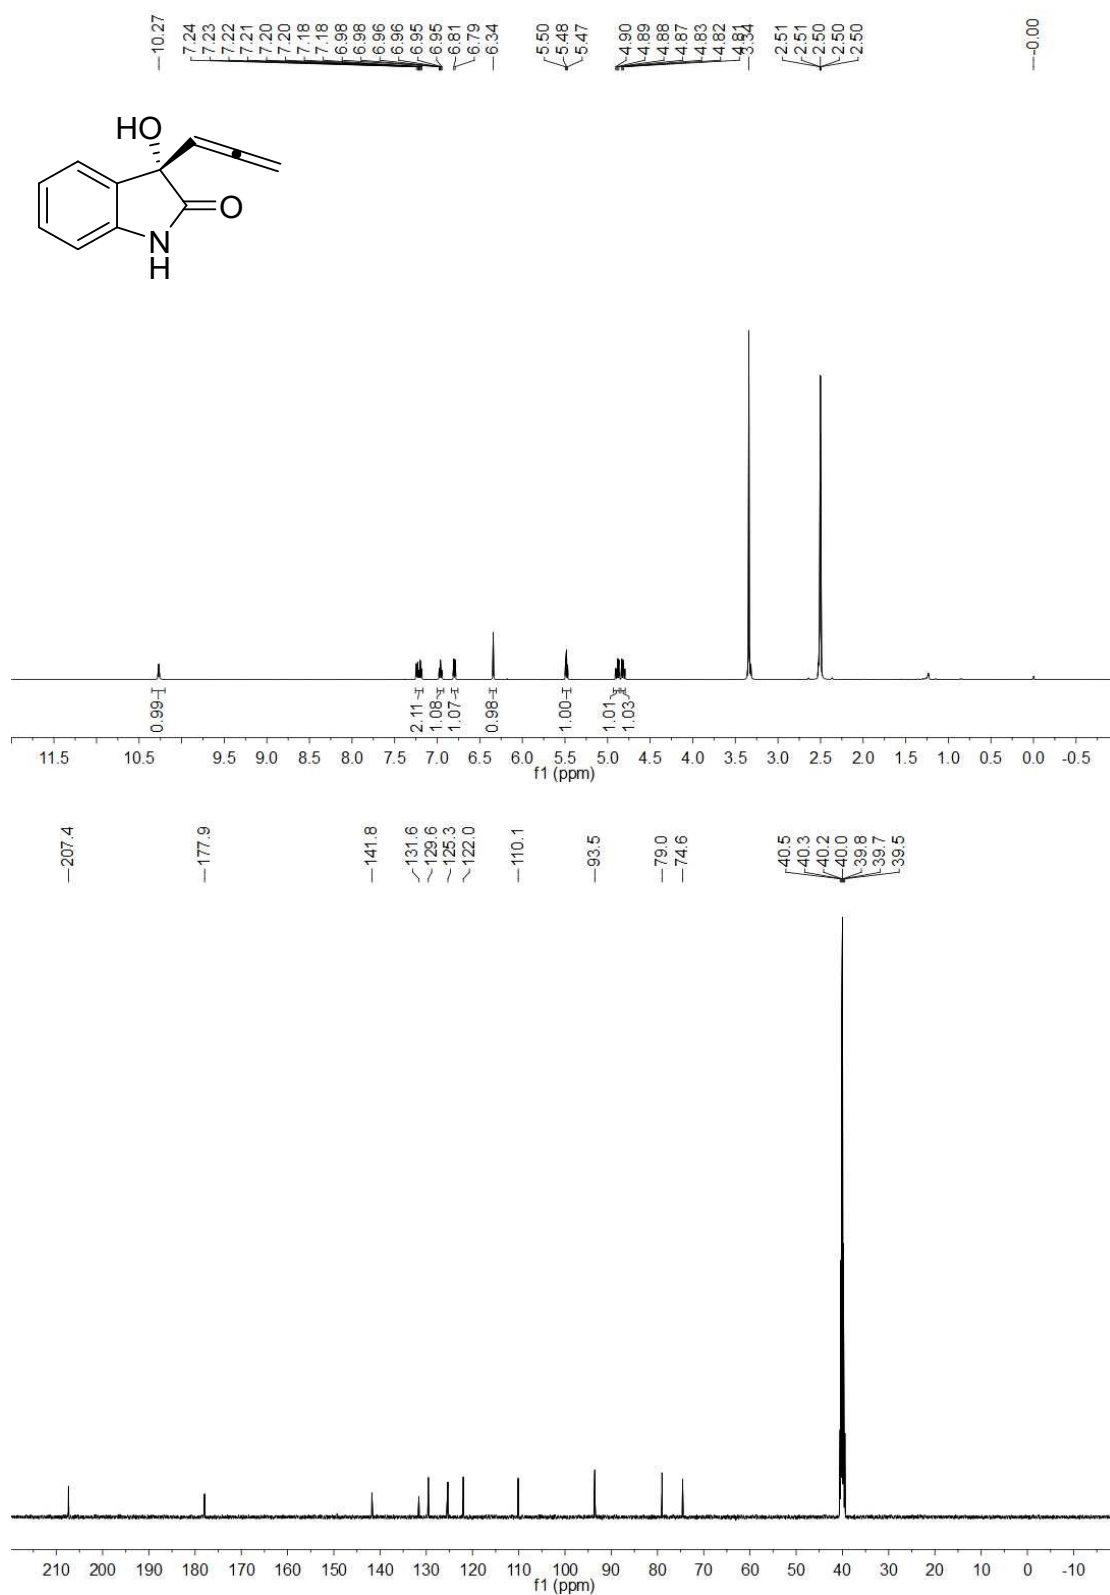

# $^1\text{H}$ NMR and $^{13}\text{C}$ NMR of **3bg**

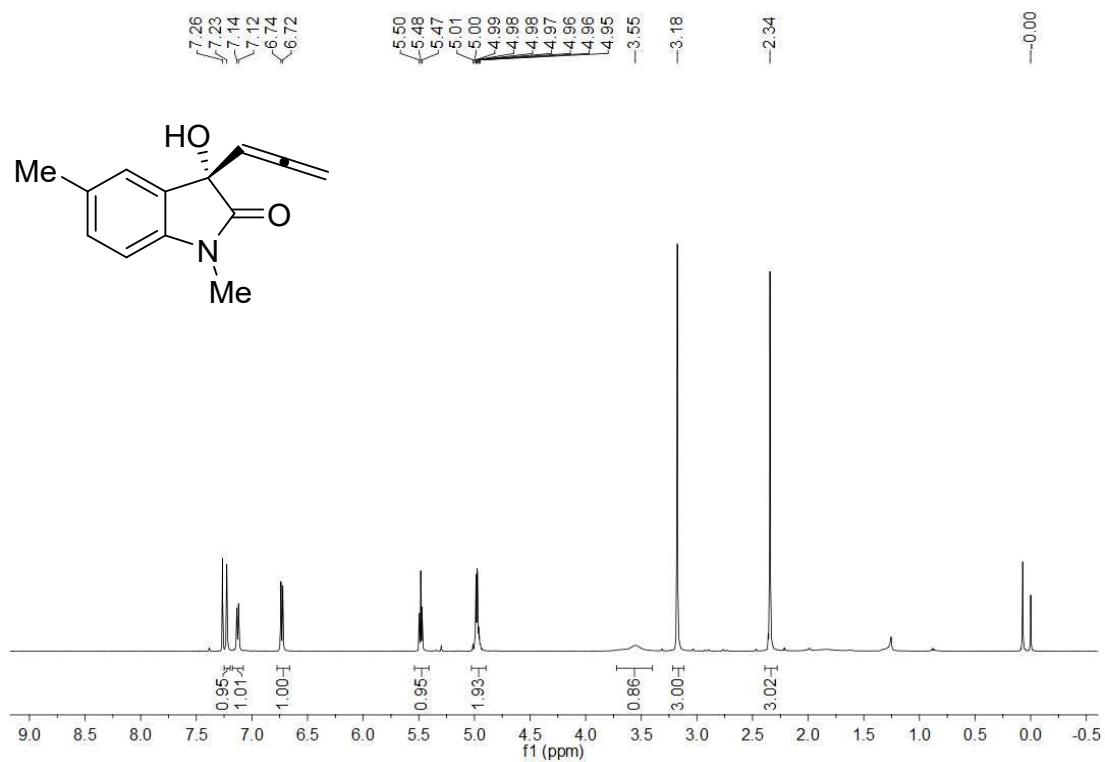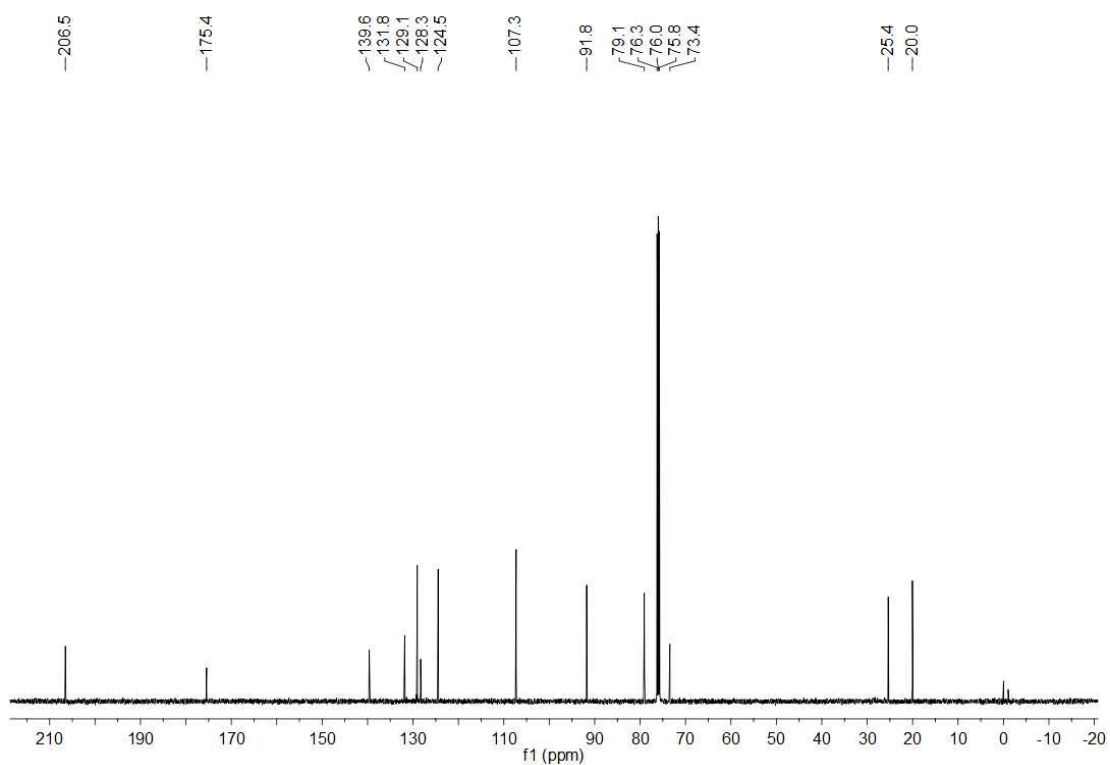

# $^1\text{H}$ NMR and $^{13}\text{C}$ NMR of **3bh**

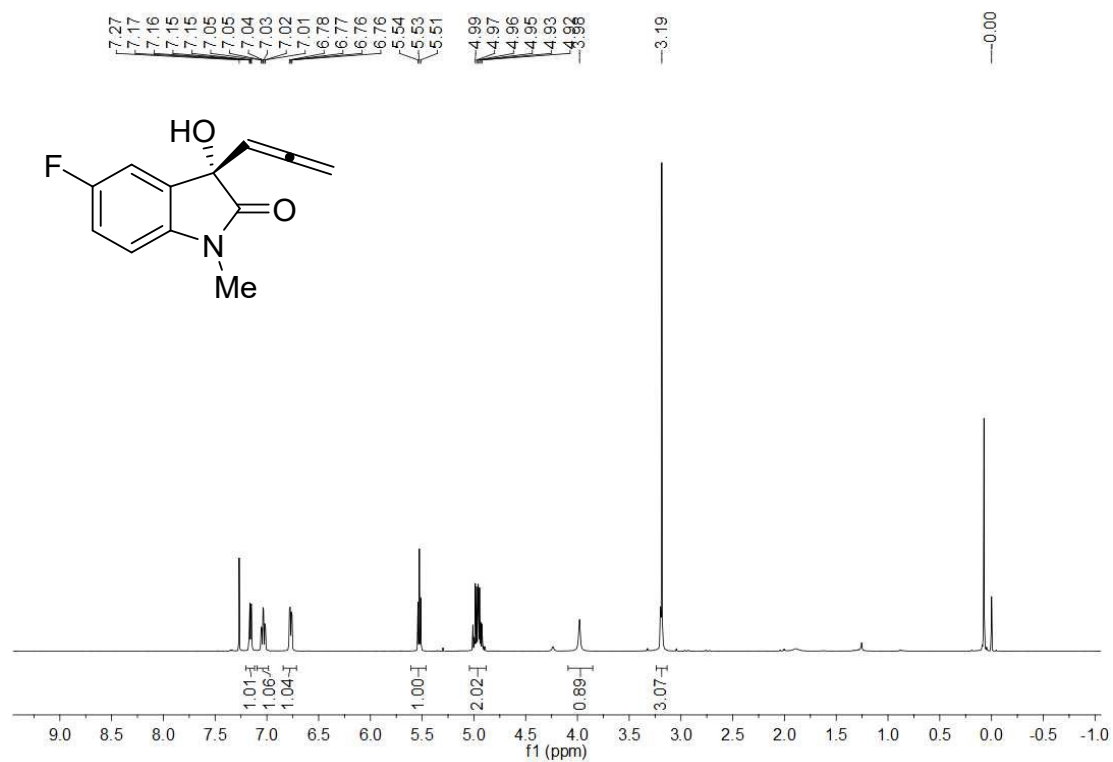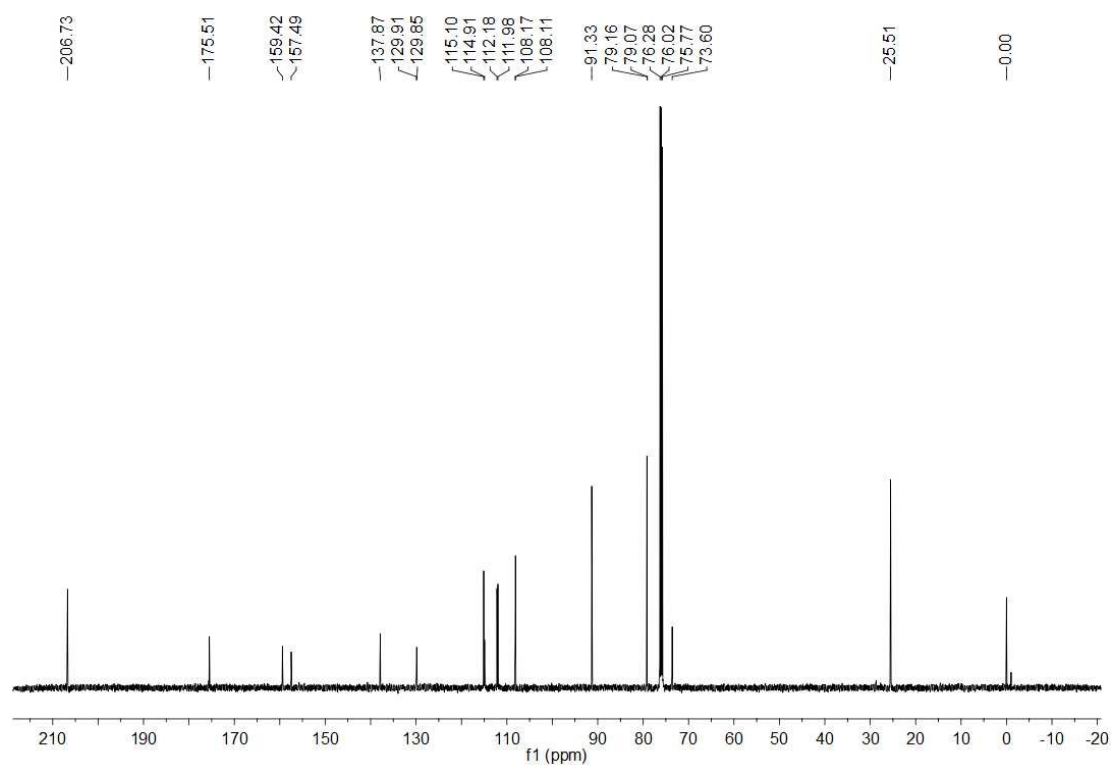

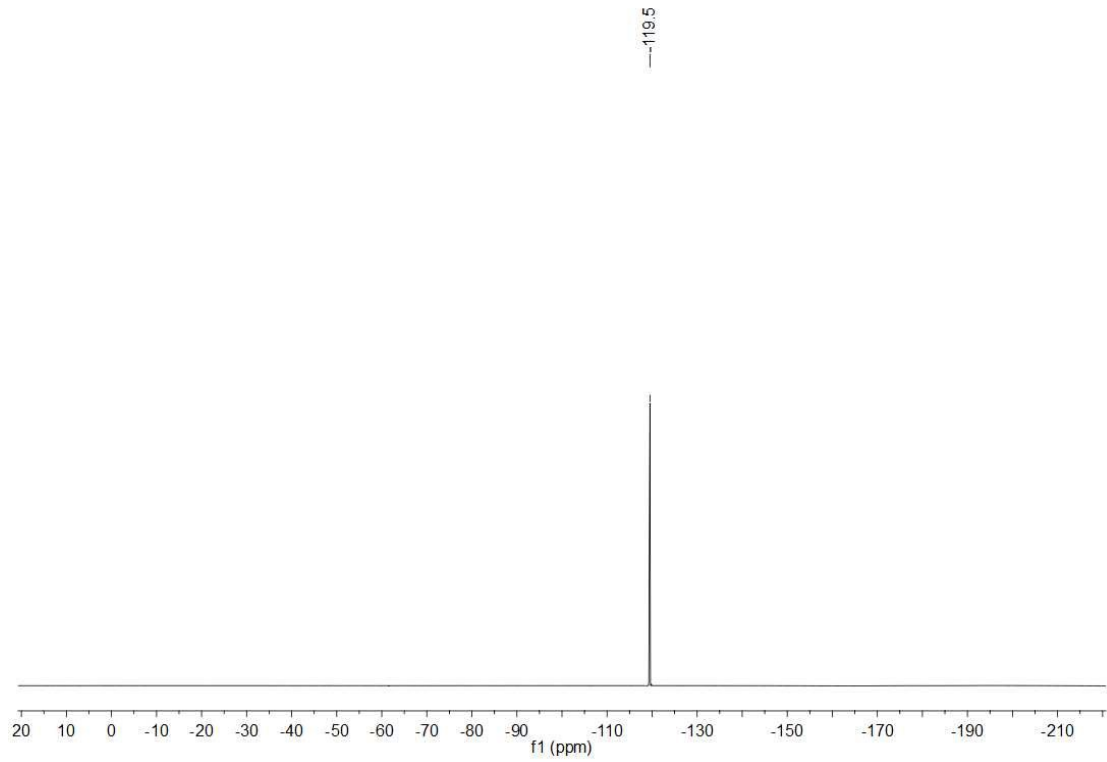

**<sup>1</sup>H NMR and <sup>13</sup>C NMR of 3bi**

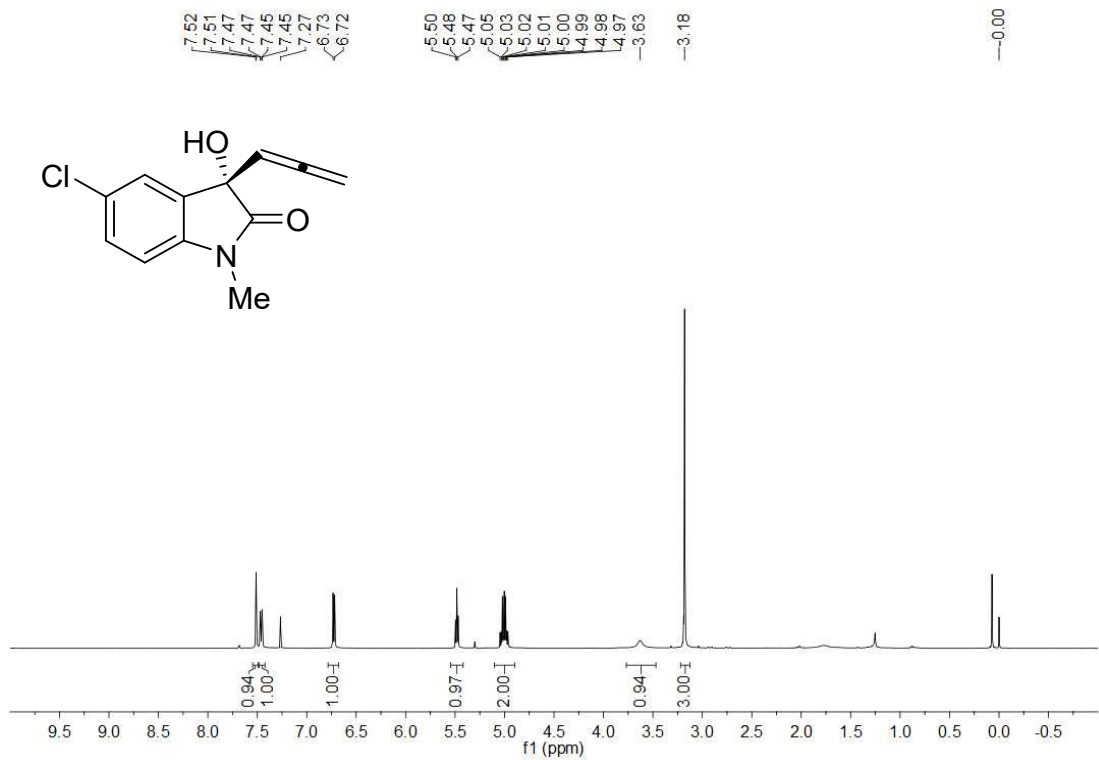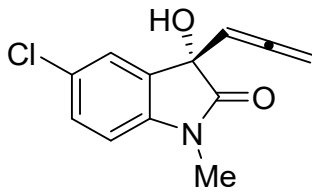



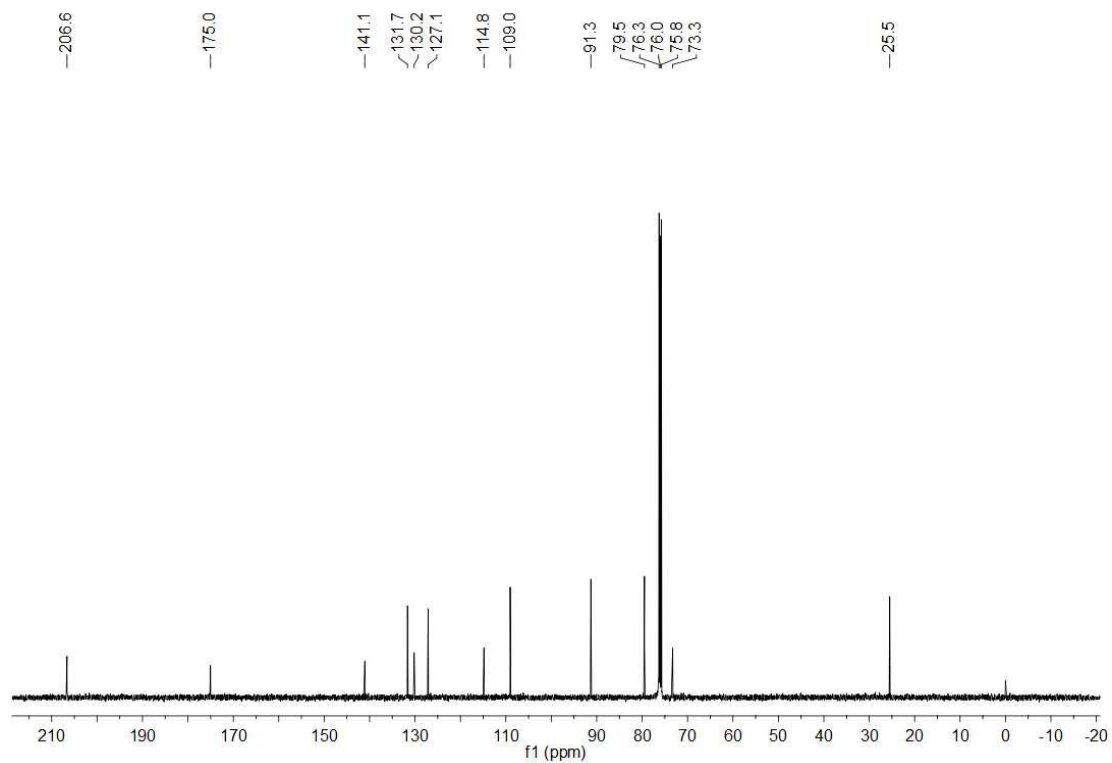

$^1\text{H}$  NMR and  $^{13}\text{C}$  NMR of **3bj**

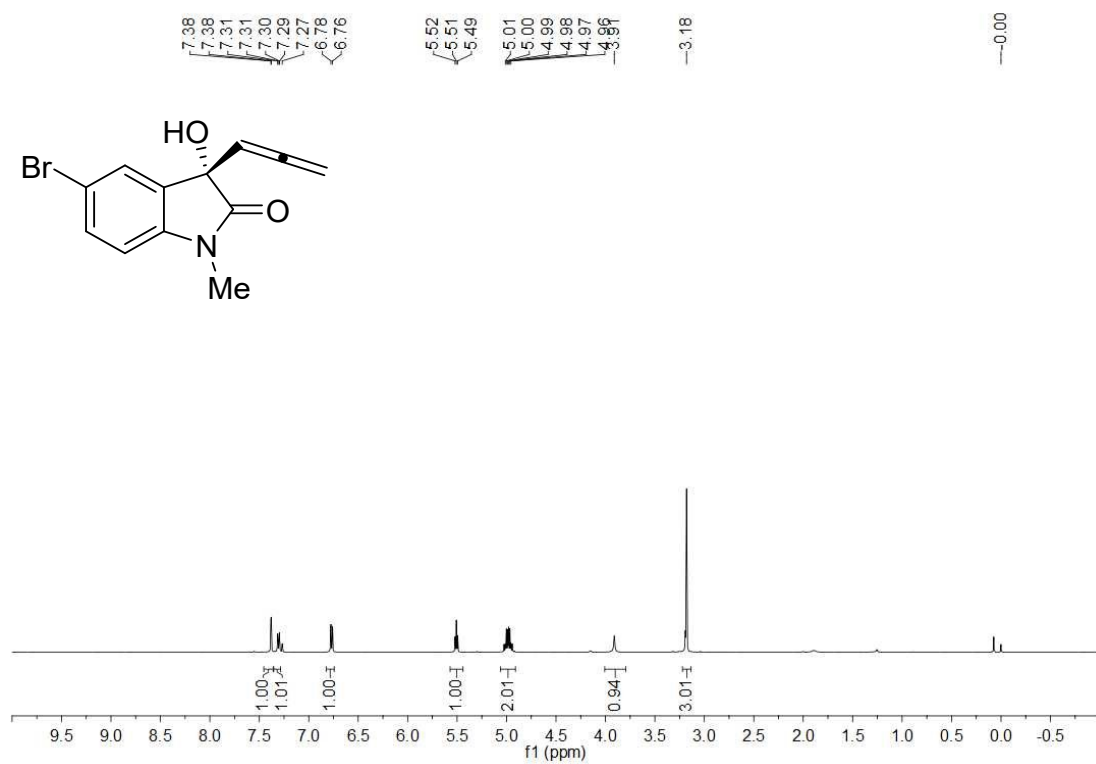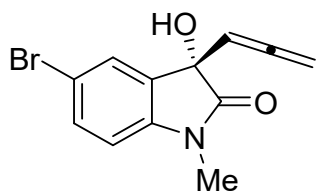

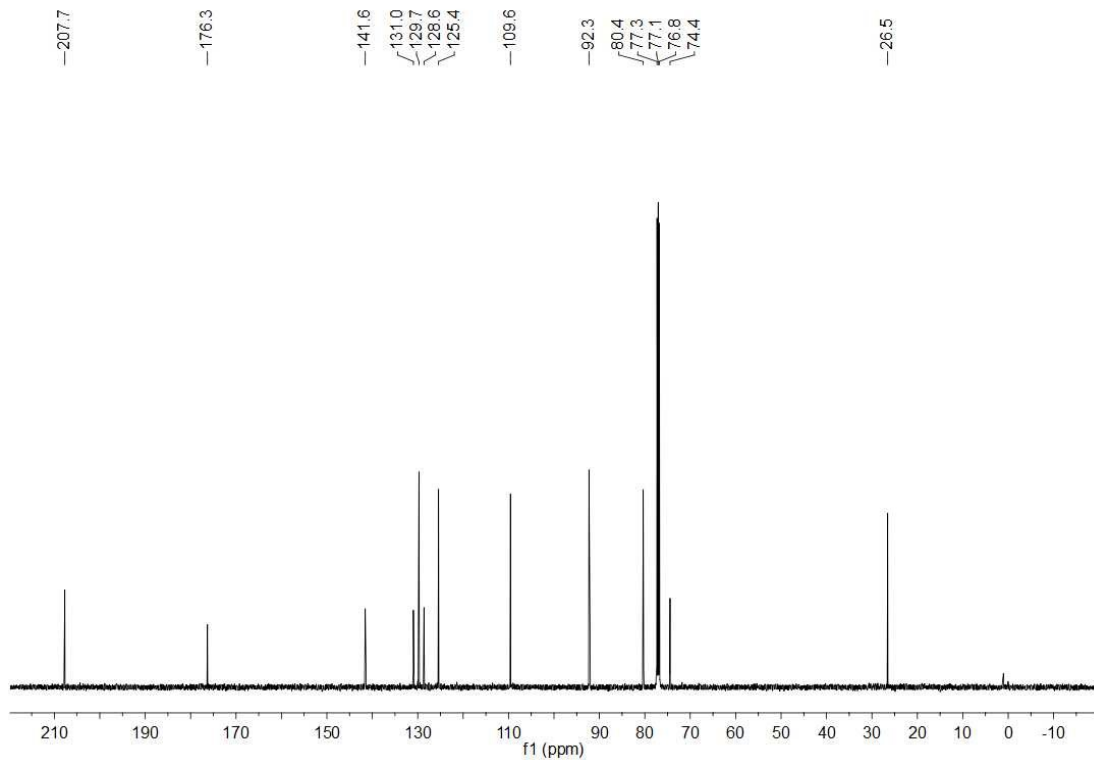

$^1\text{H}$  NMR and  $^{13}\text{C}$  NMR of **3bk**

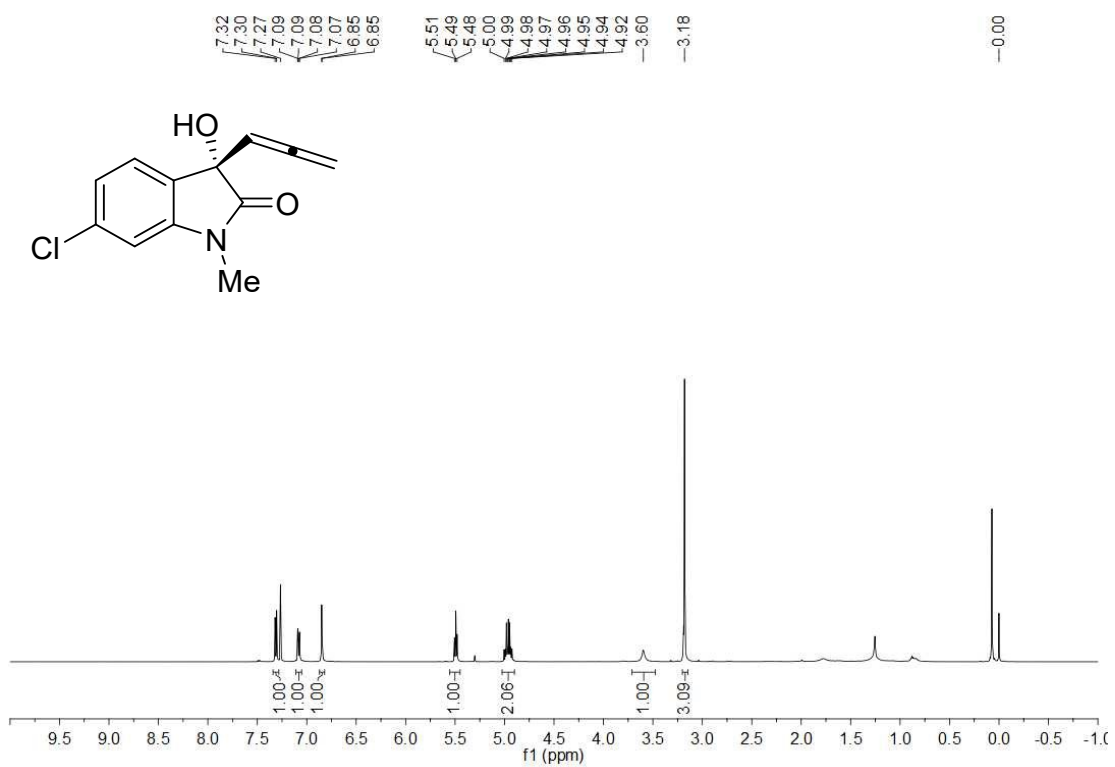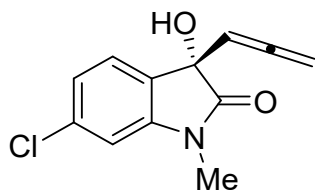

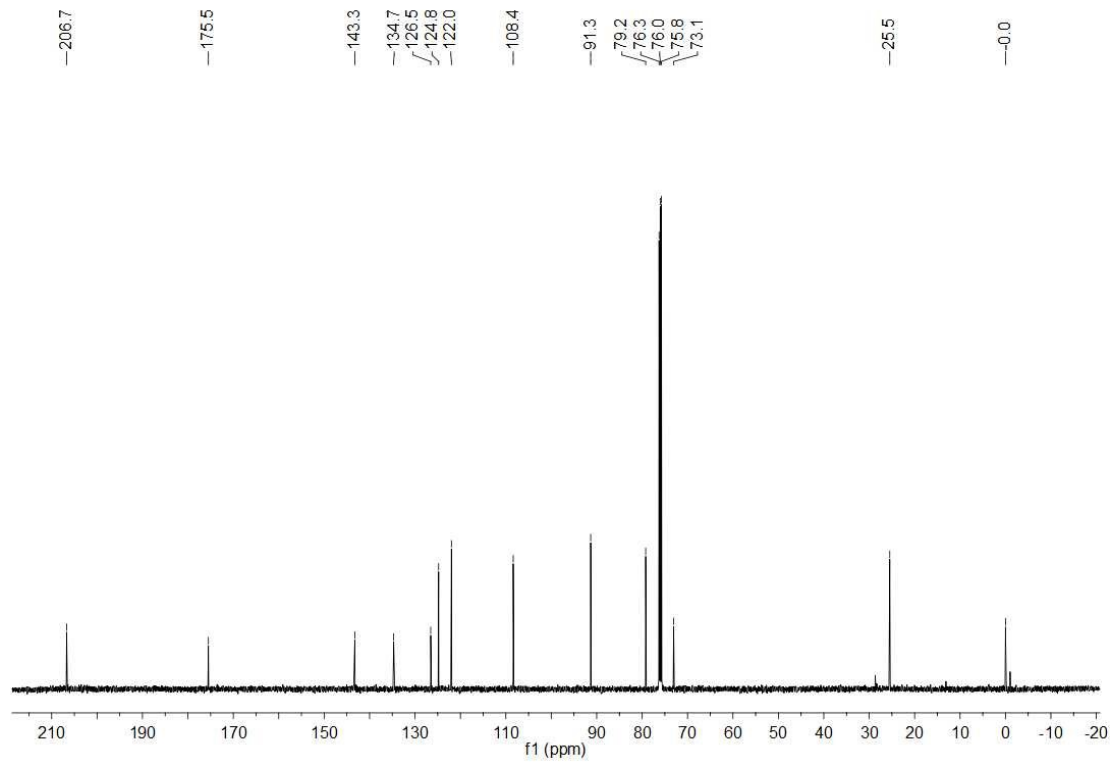

$^1\text{H}$  NMR and  $^{13}\text{C}$  NMR of **3bl**

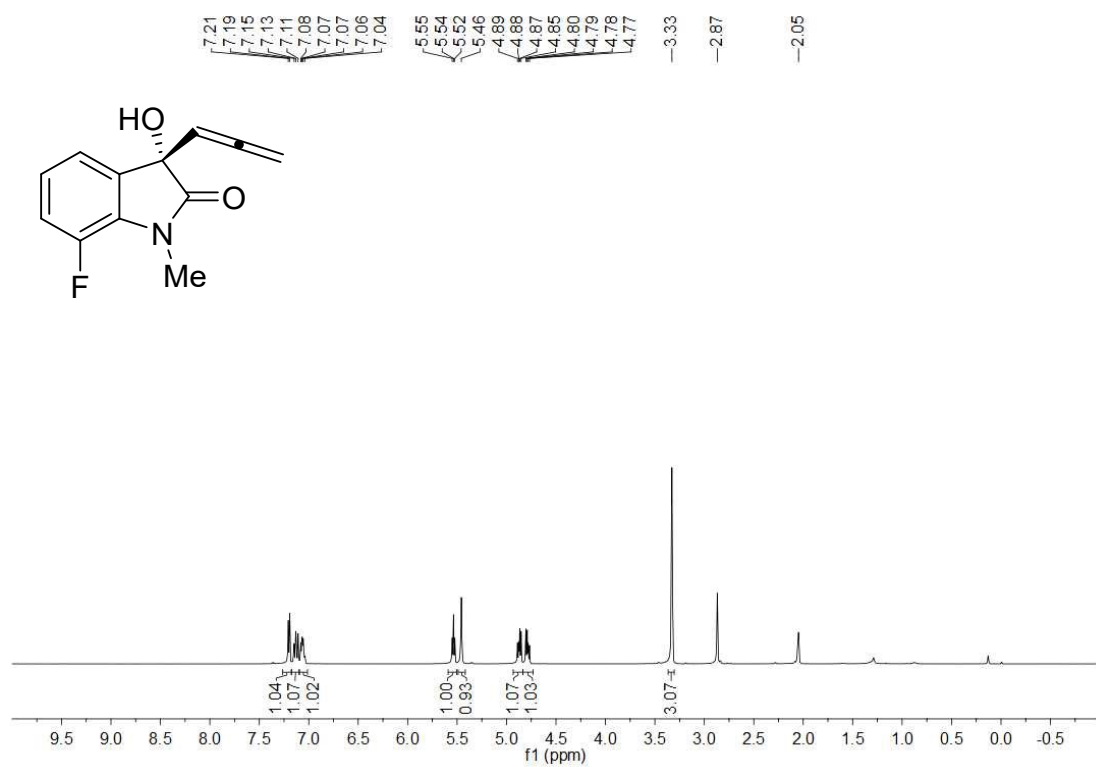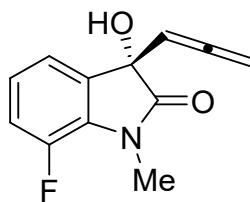

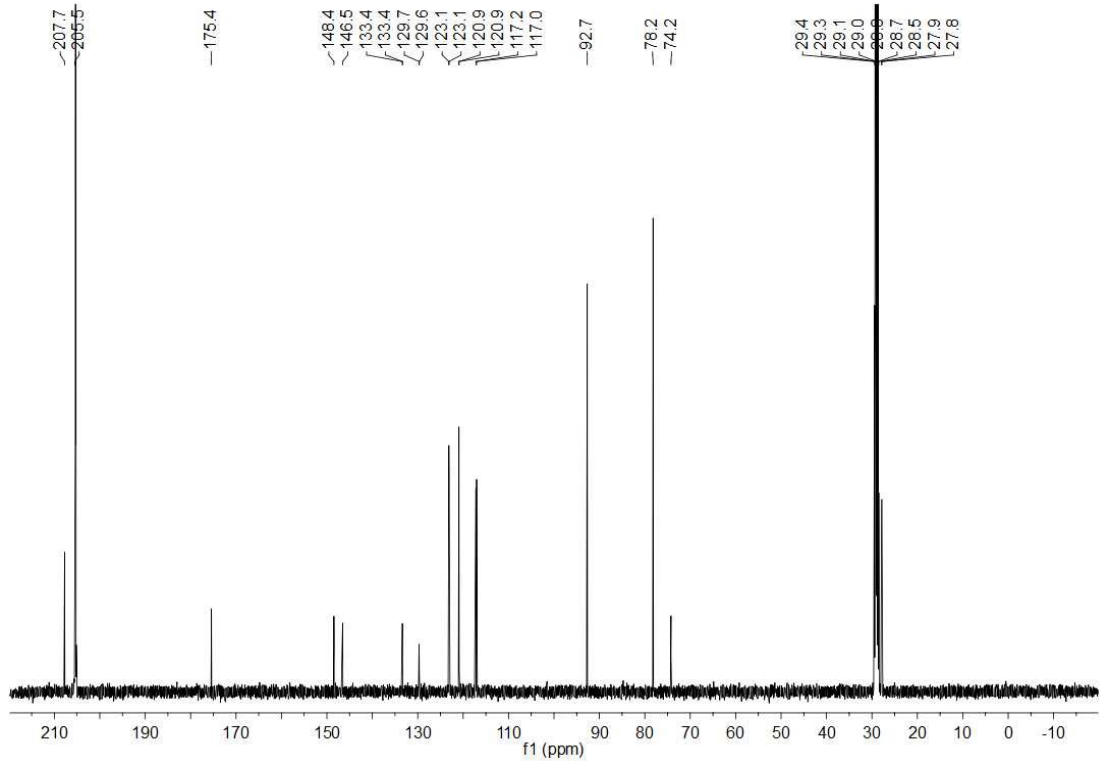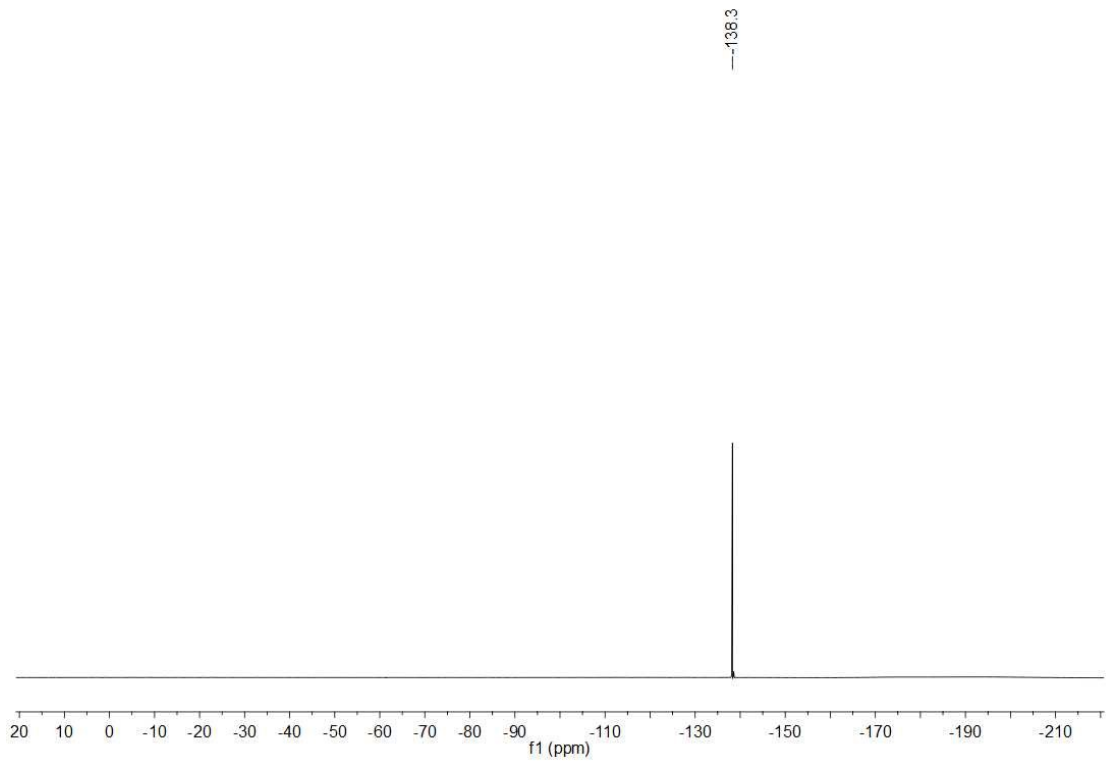

# $^1\text{H}$ NMR and $^{13}\text{C}$ NMR of **3bm**

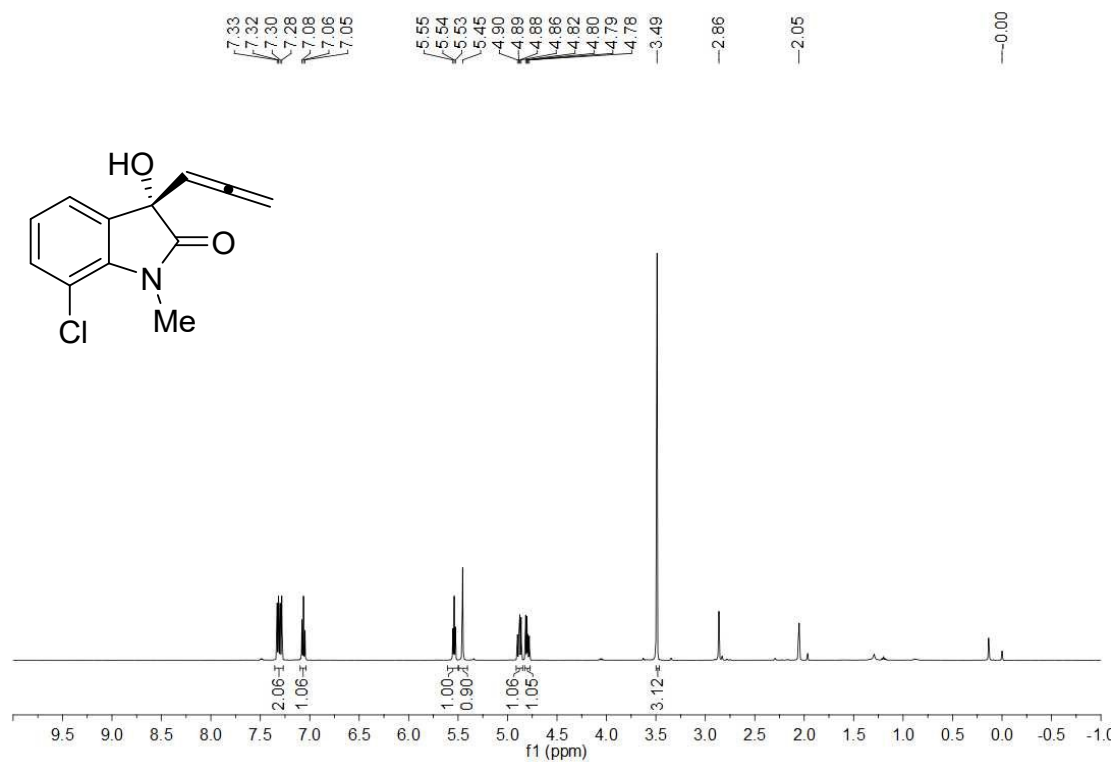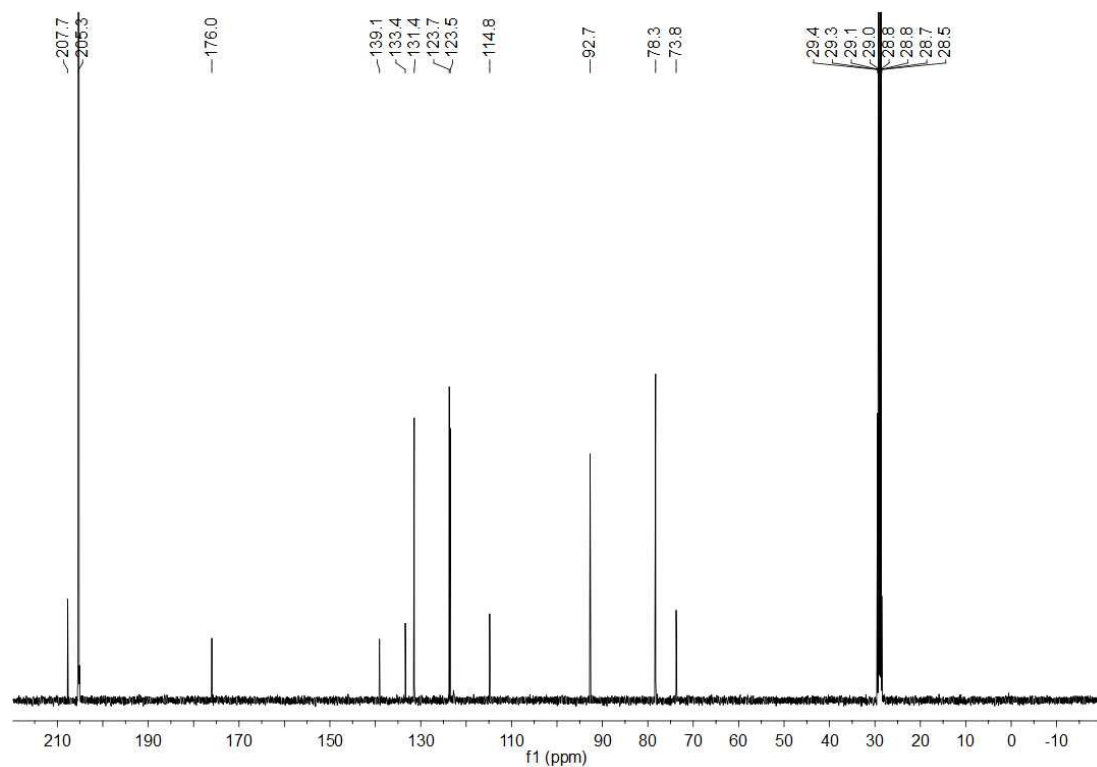

# $^1\text{H}$ NMR and $^{13}\text{C}$ NMR of **3bn**

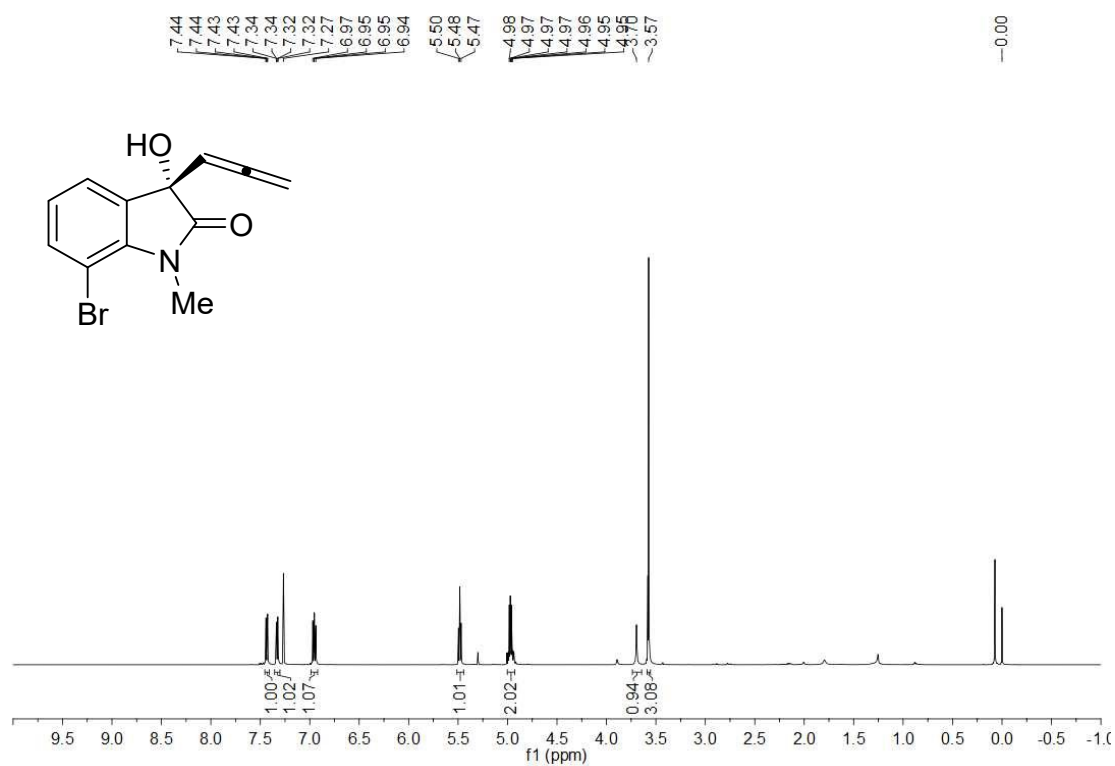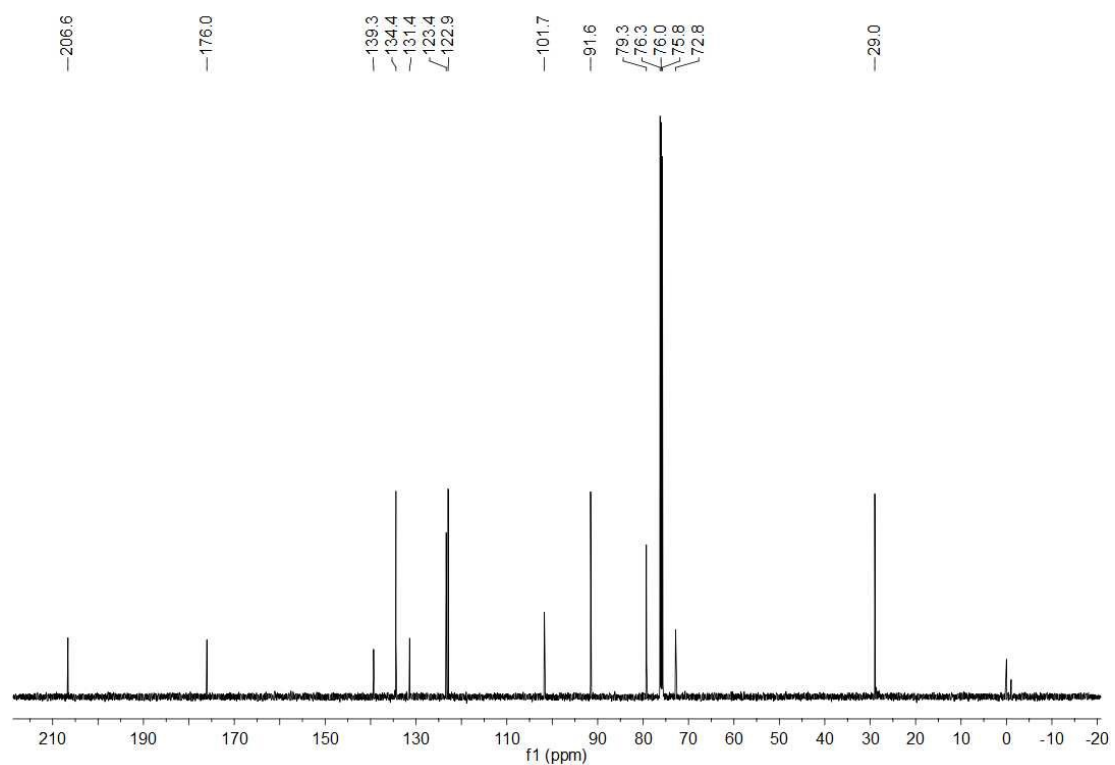

# $^1\text{H}$ NMR and $^{13}\text{C}$ NMR of **3bo**

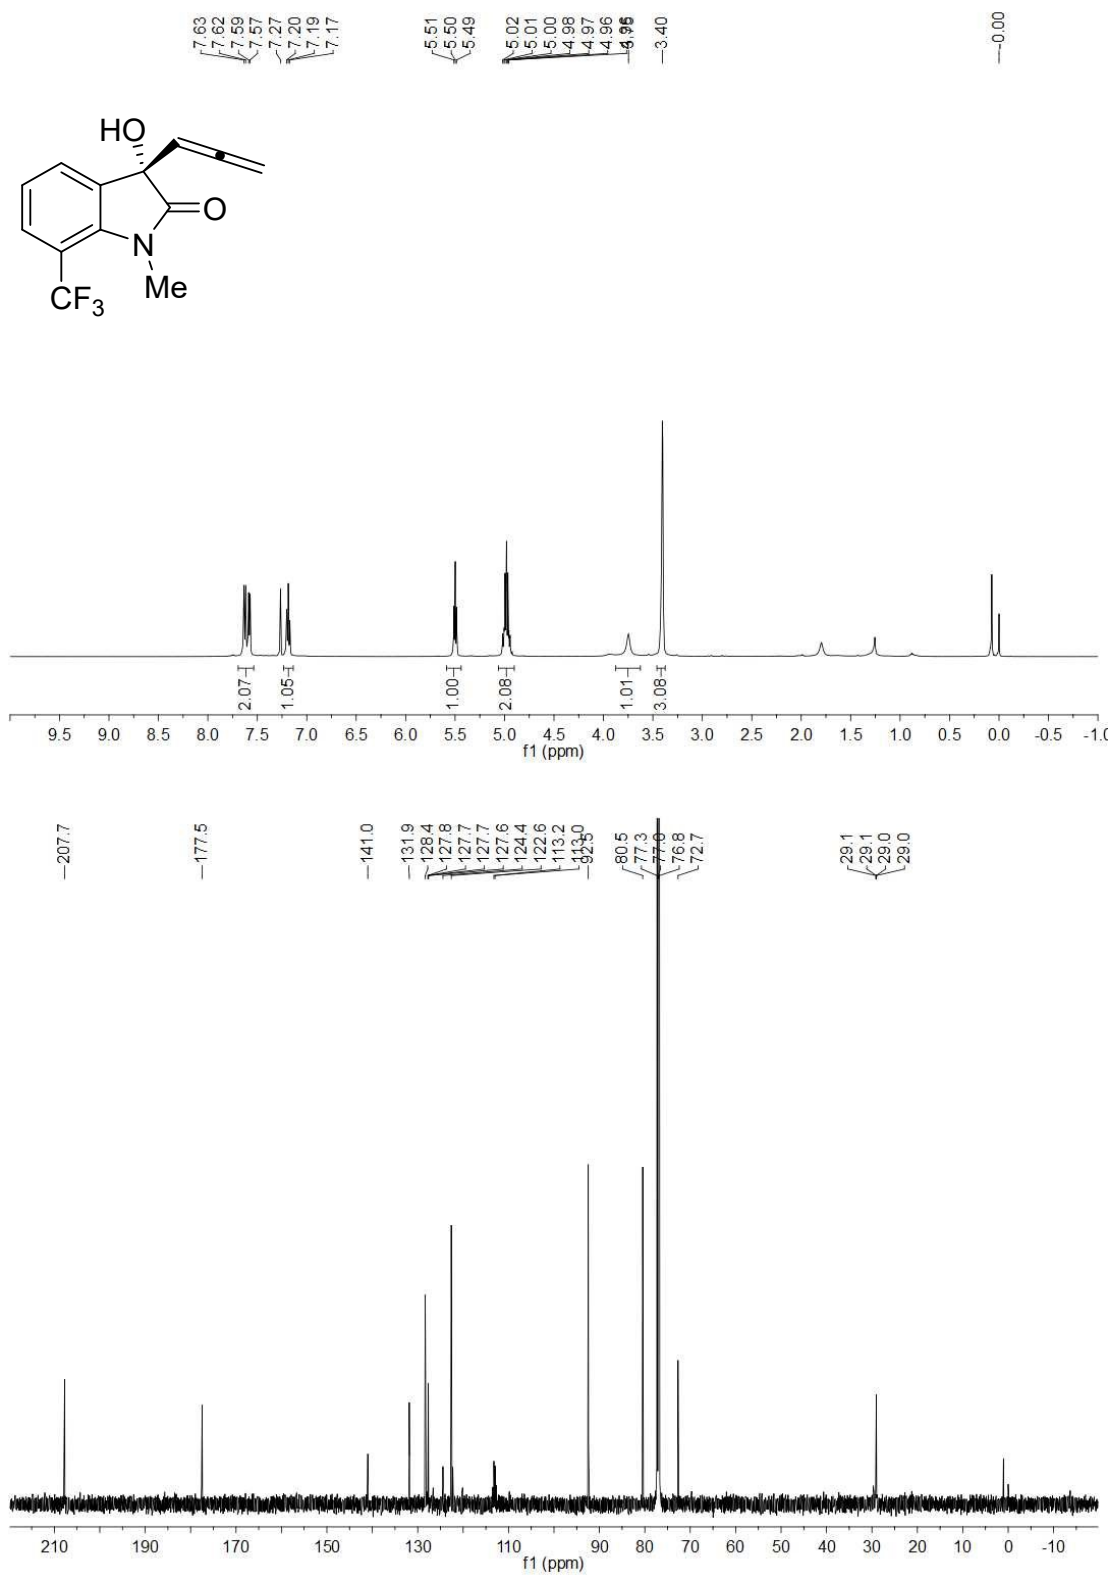

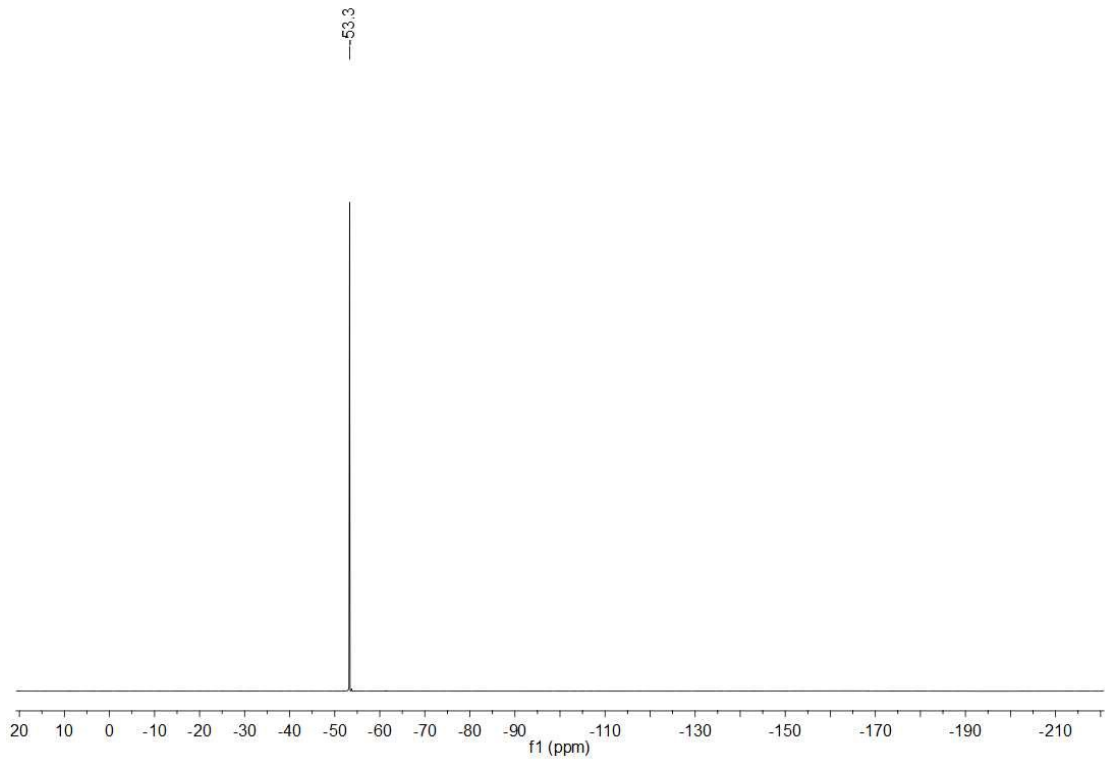

<sup>1</sup>H NMR and <sup>13</sup>C NMR of **4a**

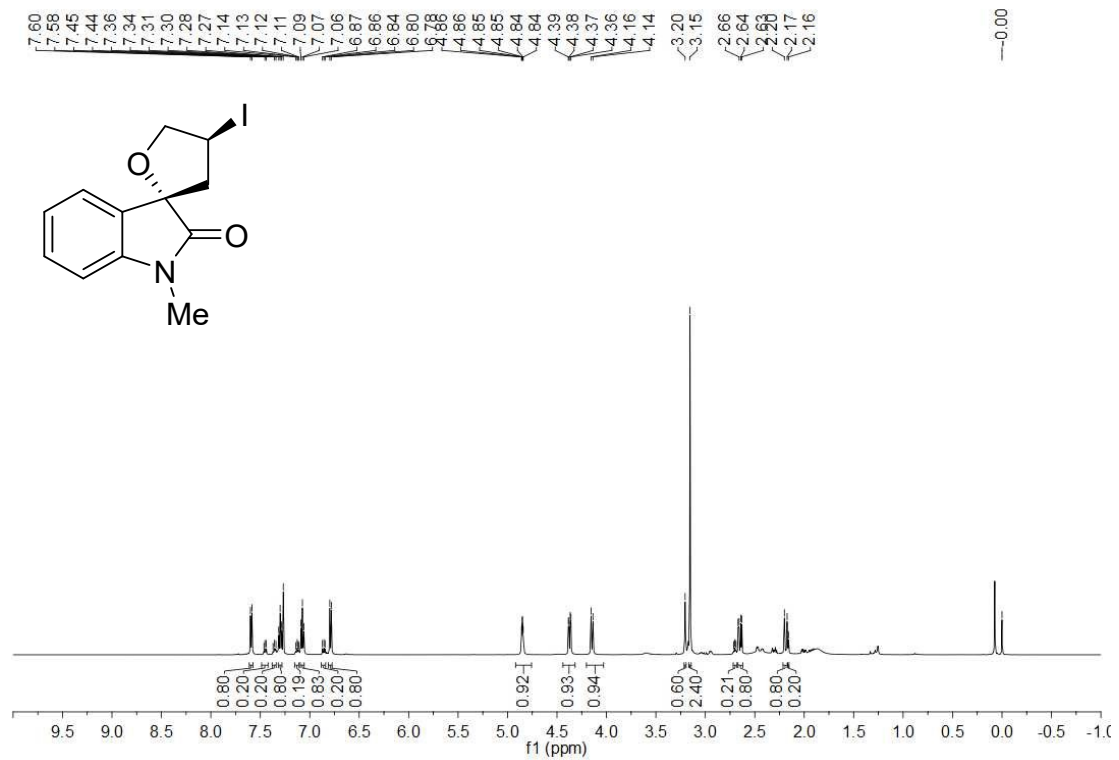



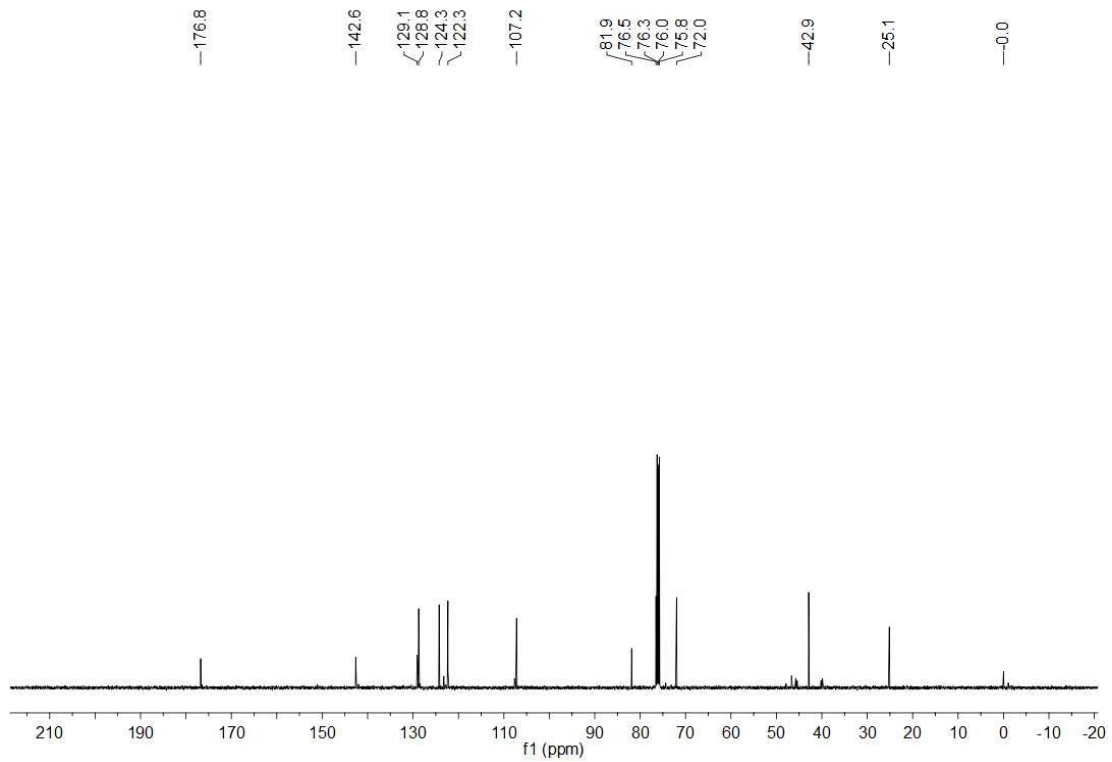

<sup>1</sup>H NMR of the crude product **4a**

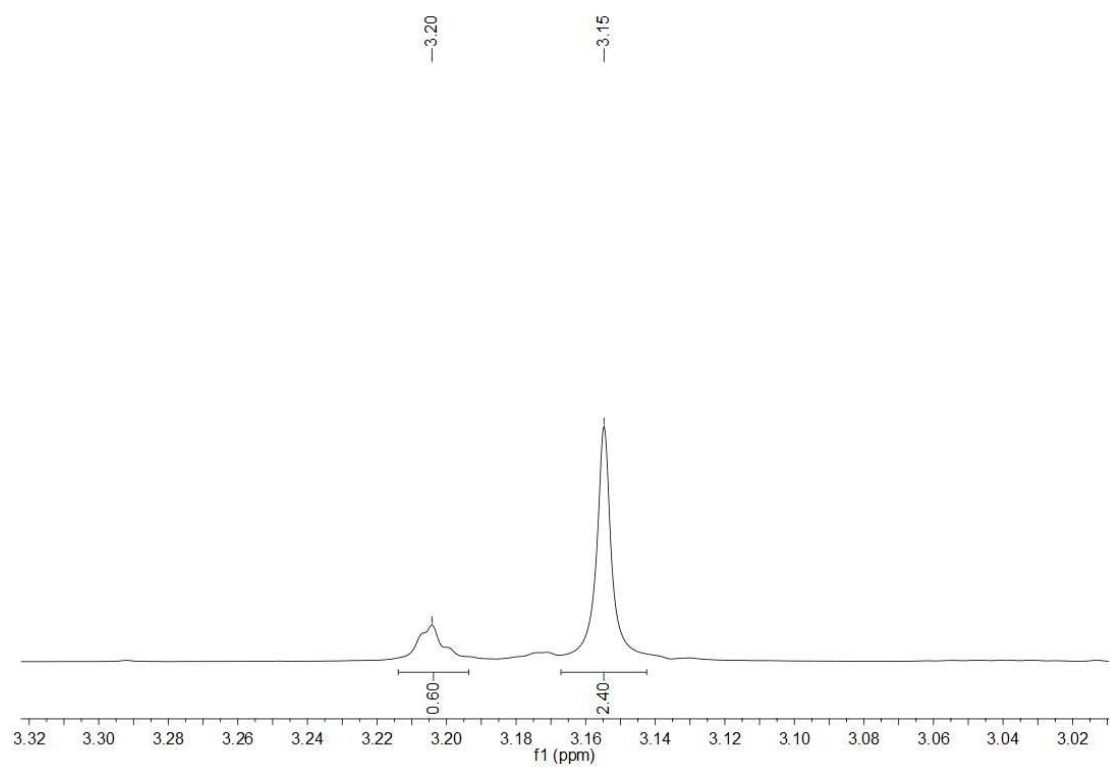

# <sup>1</sup>H NMR and <sup>13</sup>C NMR of 4b

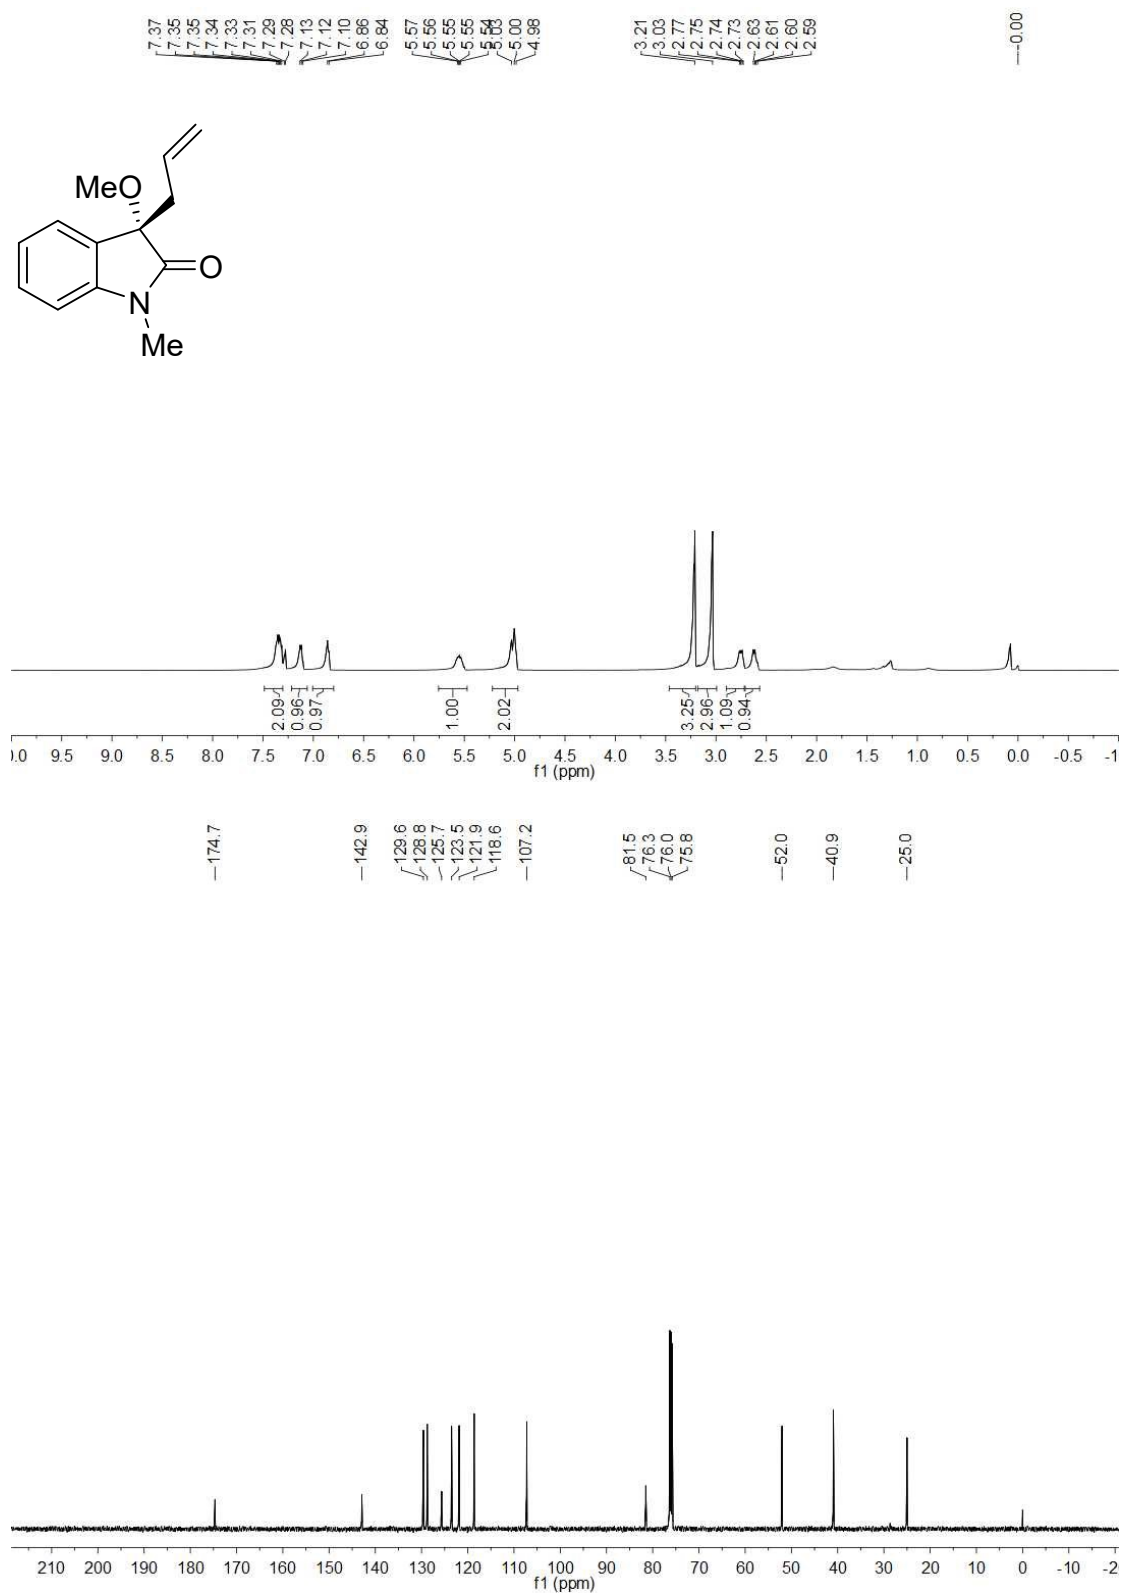

# $^1\text{H}$ NMR and $^{13}\text{C}$ NMR of 4c

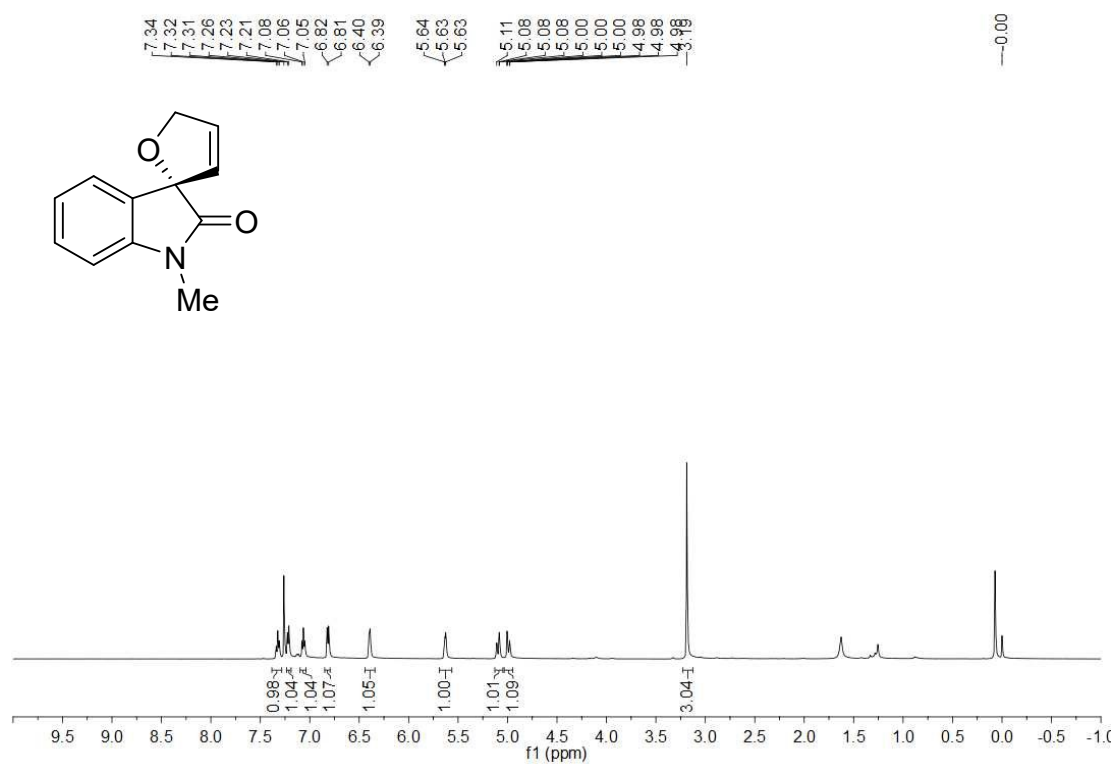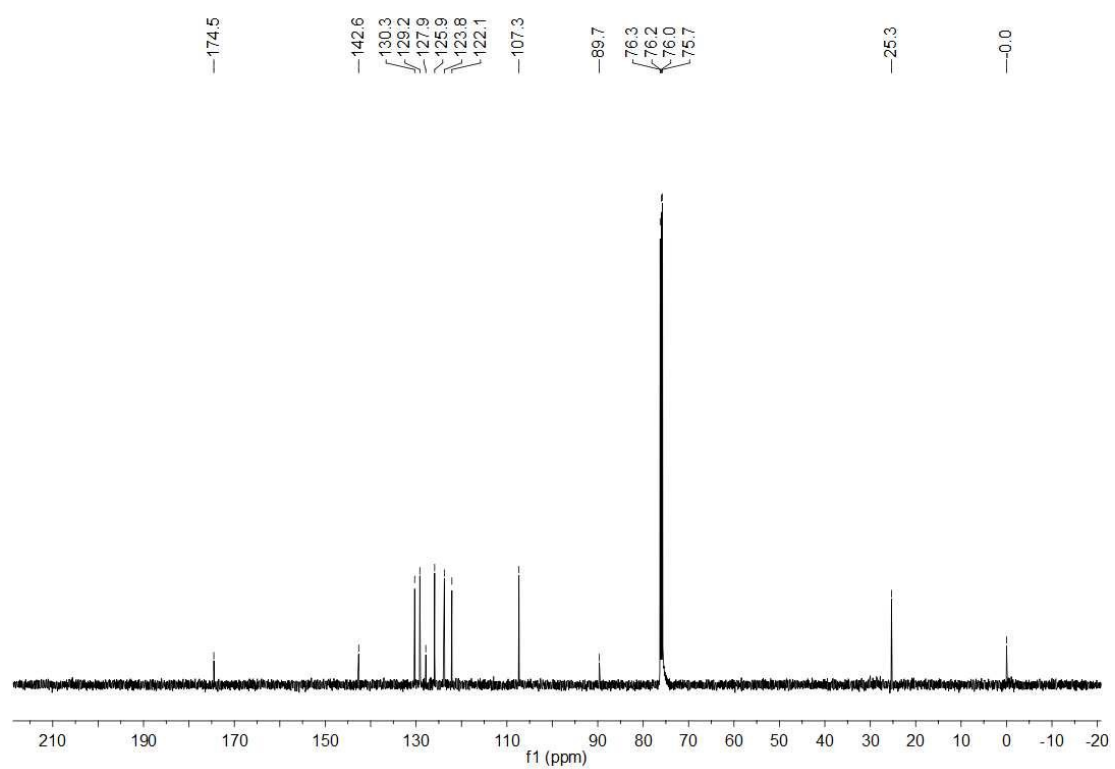

## Part III HPLC Spectra

### 3aa racemic mixture

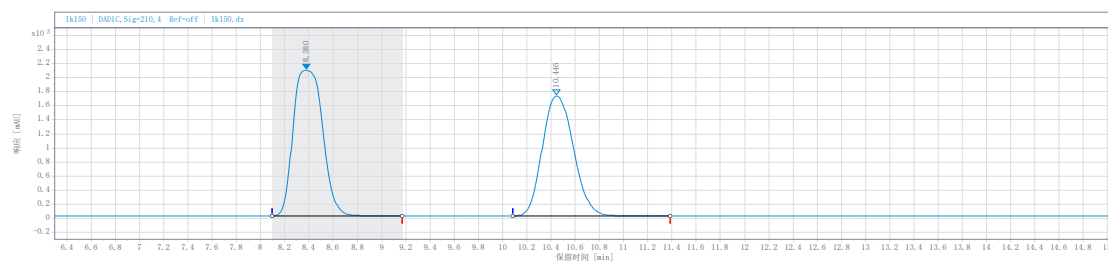

Signal: DAD1C, Sig=210, 4 Ref=off

| RetTime [min] | width [min] | Arer [mAU*s] | Height [mAU] | Area% |
|---------------|-------------|--------------|--------------|-------|
| 8.38          | 1.08        | 35074.72     | 2067.48      | 53.48 |
| 10.4          | 1.30        | 30513.54     | 1707.63      | 46.52 |

### 3aa

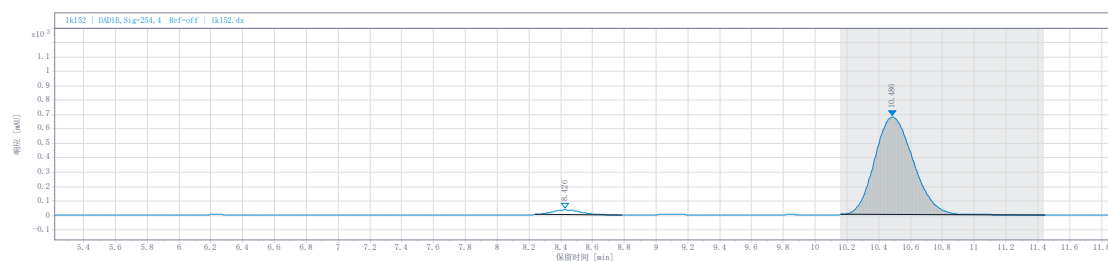

Signal: DAD1B, Sig=254, 4 Ref=off

| RetTime [min] | width [min] | Arer [mAU*s] | Height [mAU] | Area% |
|---------------|-------------|--------------|--------------|-------|
| 8.43          | 0.54        | 410.60       | 32.83        | 3.47  |
| 10.5          | 1.28        | 11427.23     | 677.23       | 96.53 |

### 3ab racemic mixture

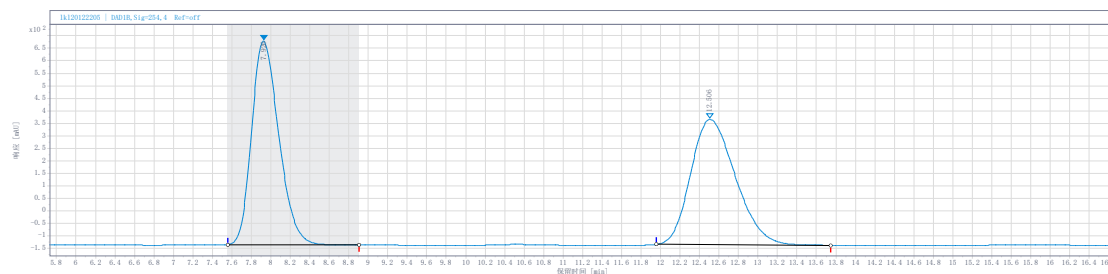

Signal: DAD1B, Sig=254, 4 Ref=off

| RetTime [min] | width [min] | Arer [mAU*s] | Height [mAU] | Area% |
|---------------|-------------|--------------|--------------|-------|
| 7.93          | 1.35        | 15822.07     | 816.01       | 49.73 |
| 12.5          | 1.79        | 15996.56     | 501.17       | 50.27 |

### 3ab

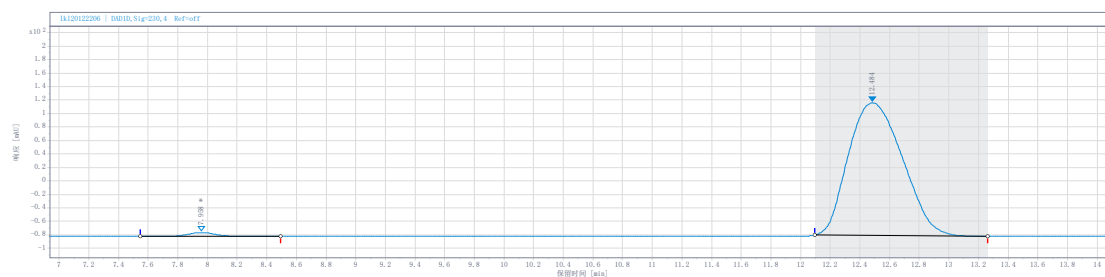

Signal: DAD1D, Sig=230, 4 Ref=off

| RetTime [min] | width [min] | Arer [mAU*s] | Height [mAU] | Area% |
|---------------|-------------|--------------|--------------|-------|
| 7.96          | 0.95        | 79.74        | 6.04         | 1.57  |
| 12.5          | 1.17        | 5002.99      | 196.93       | 98.43 |

### 3ac racemic mixture

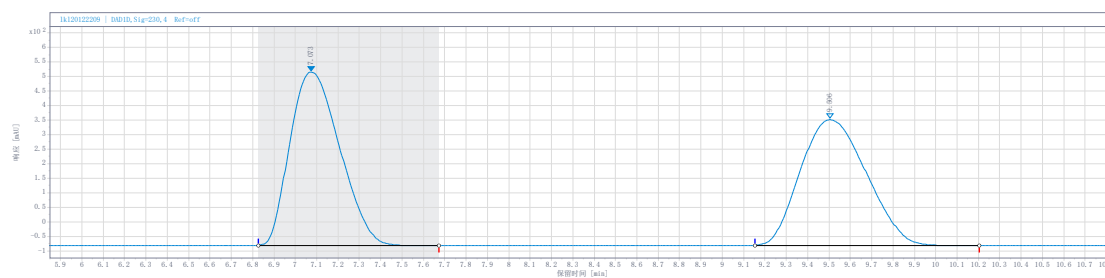

Signal: DAD1D, Sig=230, 4 Ref=off

| RetTime [min] | width [min] | Arer [mAU*s] | Height [mAU] | Area% |
|---------------|-------------|--------------|--------------|-------|
| 7.07          | 0.85        | 9659.63      | 596.80       | 50.98 |
| 9.51          | 1.05        | 9287.80      | 432.69       | 49.02 |

### 3ac

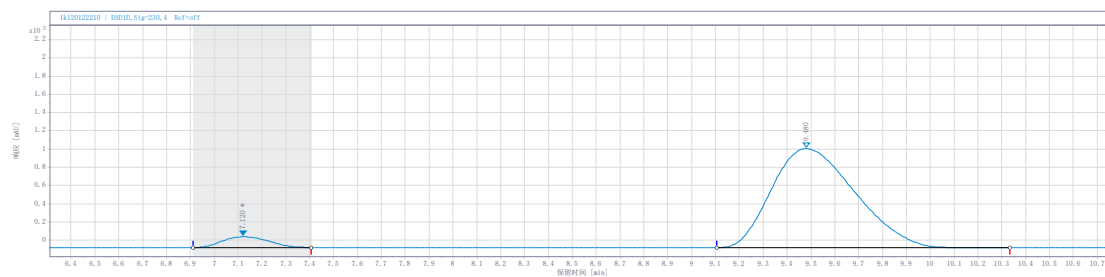

Signal: DAD1D, Sig=230, 4 Ref=off

| RetTime [min] | width [min] | Arer [mAU*s] | Height [mAU] | Area% |
|---------------|-------------|--------------|--------------|-------|
| 7.12          | 0.42        | 1468.22      | 113.50       | 5.27  |
| 9.48          | 1.23        | 26385.43     | 1085.86      | 94.73 |

### 3ad racemic mixture

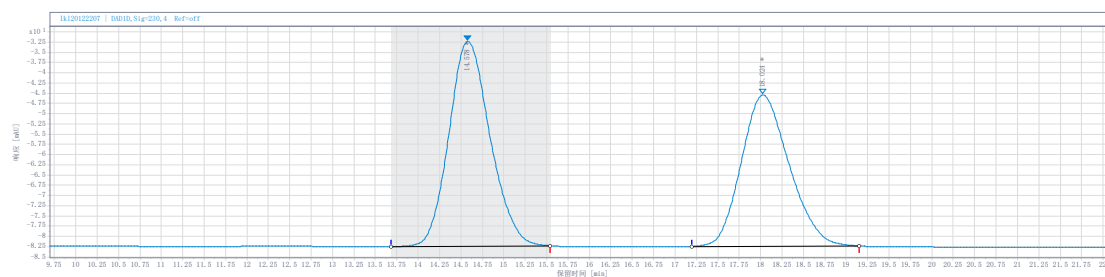

Signal: DAD1D, Sig=230, 4 Ref=off

| RetTime [min] | width [min] | Area [mAU*s] | Height [mAU] | Area% |
|---------------|-------------|--------------|--------------|-------|
| 14.6          | 1.86        | 1675.21      | 50.06        | 53.84 |
| 18.0          | 1.96        | 1436.35      | 36.99        | 46.16 |

### 3ad

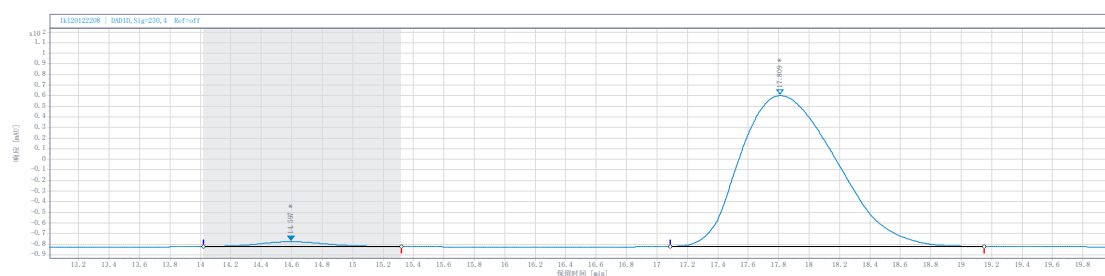

Signal: DAD1D, Sig=230, 4 Ref=off

| RetTime [min] | width [min] | Area [mAU*s] | Height [mAU] | Area% |
|---------------|-------------|--------------|--------------|-------|
| 14.6          | 1.30        | 145.69       | 4.63         | 2.29  |
| 17.8          | 2.06        | 6211.40      | 142.31       | 97.71 |

### 3ae racemic mixture

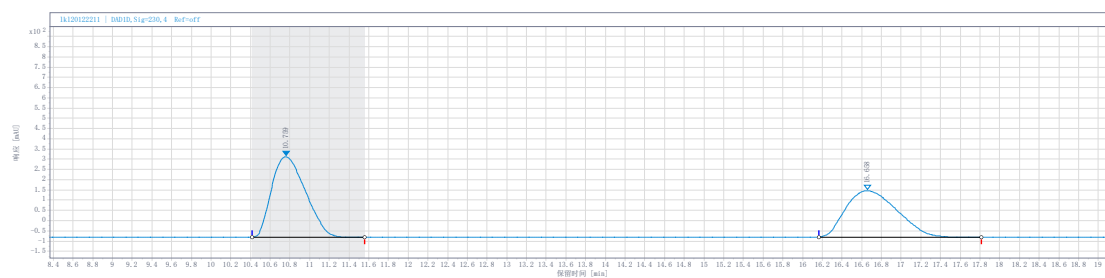

Signal: DAD1D, Sig=230, 4 Ref=off

| RetTime [min] | width [min] | Area [mAU*s] | Height [mAU] | Area% |
|---------------|-------------|--------------|--------------|-------|
| 10.8          | 1.14        | 9390.87      | 393.04       | 53.32 |
| 16.7          | 1.65        | 8222.77      | 226.55       | 46.68 |

### 3ae

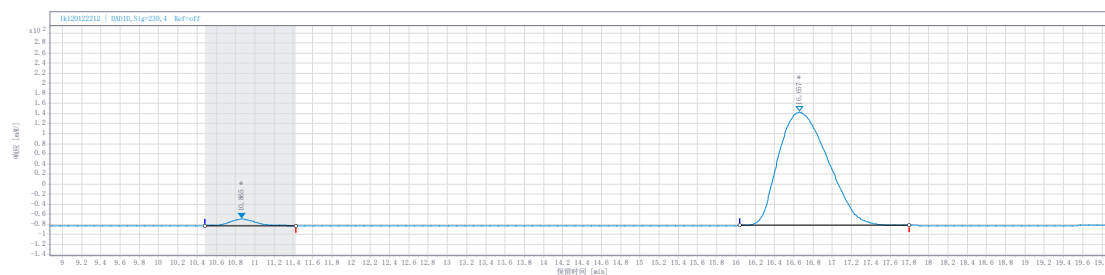

Signal: DAD1D, Sig=230, 4 Ref=off

| RetTime [min] | width [min] | Arer [mAU*s] | Height [mAU] | Area% |
|---------------|-------------|--------------|--------------|-------|
| 10.9          | 0.95        | 227.60       | 12.67        | 2.75  |
| 16.7          | 1.76        | 8041.29      | 224.48       | 97.25 |

### 3af racemic mixture

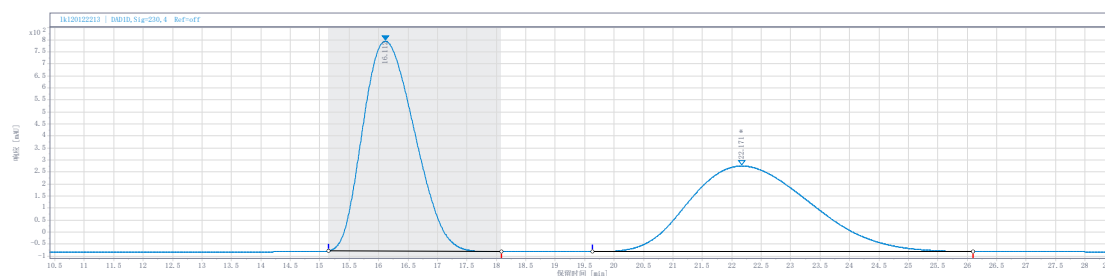

Signal: DAD1D, Sig=230, 4 Ref=off

| RetTime [min] | width [min] | Arer [mAU*s] | Height [mAU] | Area% |
|---------------|-------------|--------------|--------------|-------|
| 16.1          | 2.93        | 53267.95     | 874.58       | 51.07 |
| 22.2          | 6.47        | 51032.58     | 356.51       | 48.93 |

### 3af

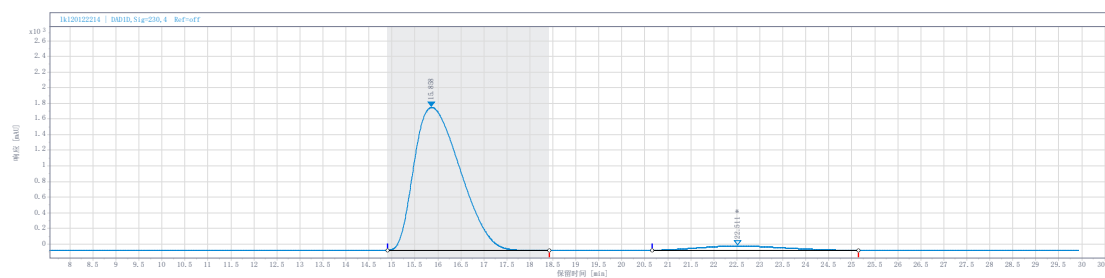

Signal: DAD1D, Sig=230, 4 Ref=off

| RetTime [min] | width [min] | Arer [mAU*s] | Height [mAU] | Area% |
|---------------|-------------|--------------|--------------|-------|
| 15.9          | 3.51        | 126752.24    | 1827.41      | 94.76 |
| 22.5          | 4.48        | 7011.24      | 54.75        | 5.24  |

### 3ag racemic mixture

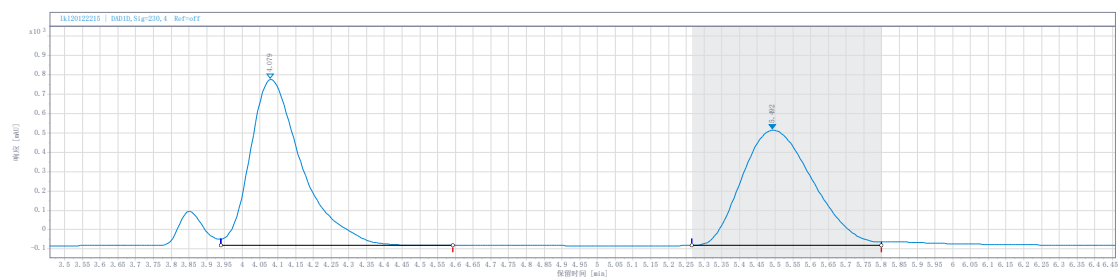

Signal: DAD1D, Sig=230, 4 Ref=off

| RetTime [min] | width [min] | Area [mAU*s] | Height [mAU] | Area% |
|---------------|-------------|--------------|--------------|-------|
| 4.08          | 0.65        | 8653.65      | 854.98       | 51.18 |
| 5.49          | 0.53        | 8254.23      | 594.02       | 48.82 |

### 3ag

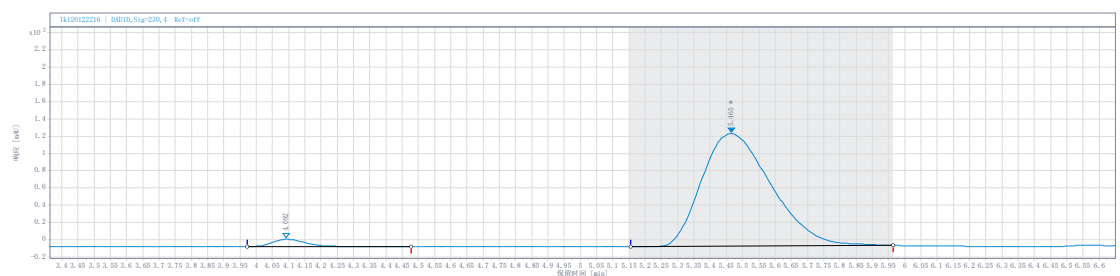

Signal: DAD1D, Sig=230, 4 Ref=off

| RetTime [min] | width [min] | Area [mAU*s] | Height [mAU] | Area% |
|---------------|-------------|--------------|--------------|-------|
| 4.09          | 0.51        | 630.60       | 86.05        | 3.14  |
| 5.46          | 0.81        | 19464.99     | 1305.15      | 96.86 |

### 3ah racemic mixture

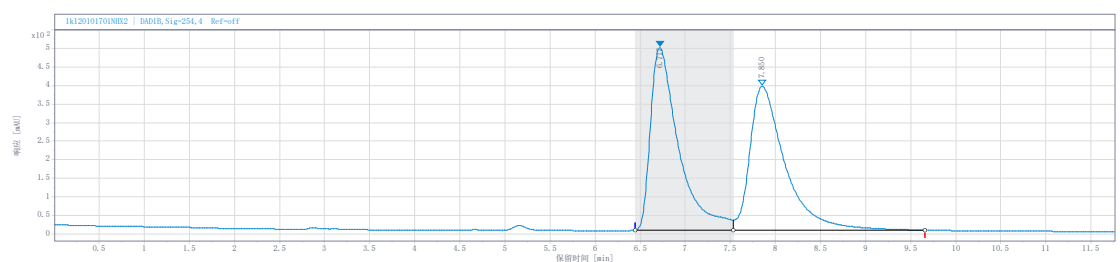

Signal: DAD1B, Sig=254, 4 Ref=off

| RetTime [min] | width [min] | Area [mAU*s] | Height [mAU] | Area% |
|---------------|-------------|--------------|--------------|-------|
| 6.72          | 1.09        | 10703.85     | 491.45       | 50.39 |
| 7.85          | 2.13        | 10539.46     | 387.90       | 49.61 |



### 3ah

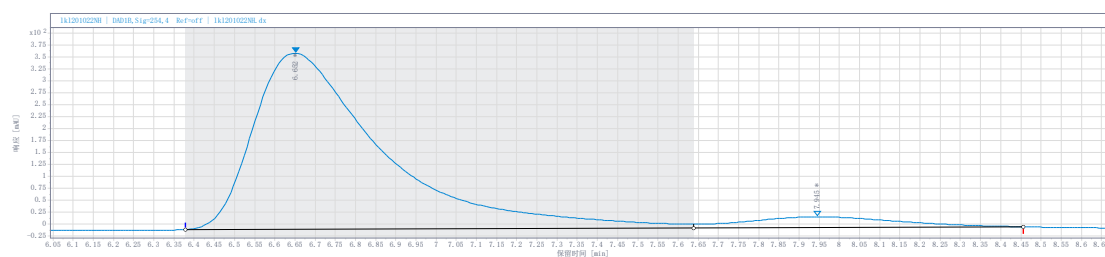

Signal: DAD1B, Sig=254, 4 Ref=off

| RetTime [min] | width [min] | Area [mAU*s] | Height [mAU] | Area% |
|---------------|-------------|--------------|--------------|-------|
| 6.65          | 1.26        | 8206.20      | 368.25       | 93.33 |
| 7.94          | 0.82        | 586.09       | 22.31        | 6.67  |

### 3ai racemic mixture

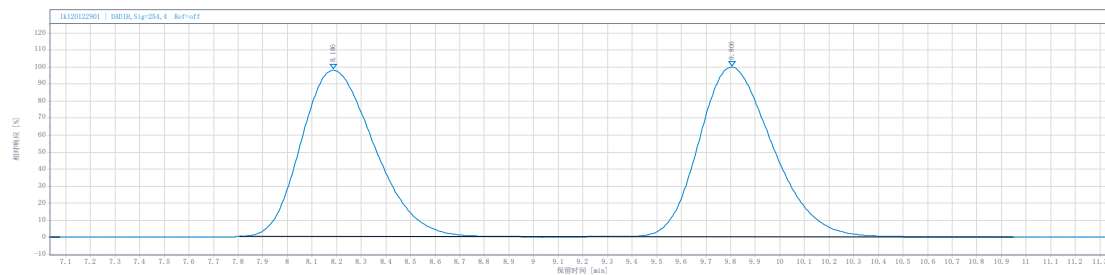

Signal: DAD1B, Sig=254, 4 Ref=off

| RetTime [min] | width [min] | Area [mAU*s] | Height [mAU] | Area% |
|---------------|-------------|--------------|--------------|-------|
| 8.19          | 1.23        | 22931.90     | 1111.46      | 49.29 |
| 9.81          | 1.91        | 23590.12     | 1133.93      | 50.71 |

### 3ai

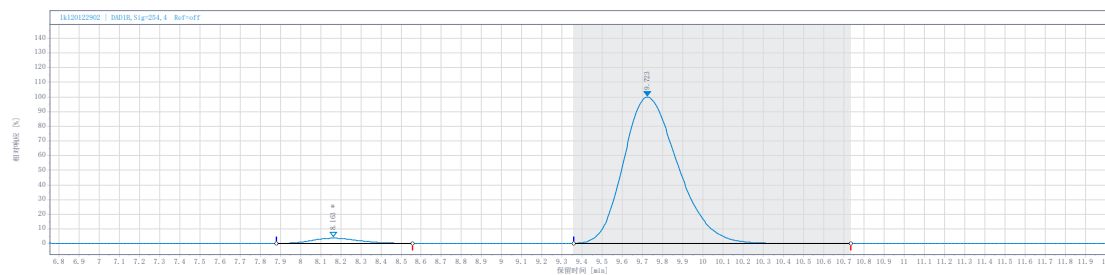

Signal: DAD1B, Sig=254, 4 Ref=off

| RetTime [min] | width [min] | Area [mAU*s] | Height [mAU] | Area% |
|---------------|-------------|--------------|--------------|-------|
| 8.16          | 0.68        | 682.22       | 41.76        | 3.05  |
| 9.72          | 1.38        | 21662.24     | 1153.22      | 96.95 |

### 3aj racemic mixture

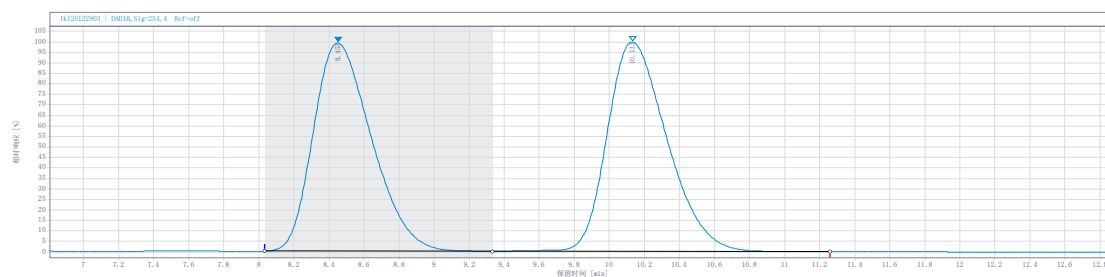

Signal: DAD1B, Sig=254, 4 Ref=off

| RetTime [min] | width [min] | Arer [mAU*s] | Height [mAU] | Area% |
|---------------|-------------|--------------|--------------|-------|
| 8.45          | 1.30        | 38565.89     | 1668.28      | 49.17 |
| 10.1          | 1.93        | 39863.53     | 1680.20      | 50.83 |

### 3aj

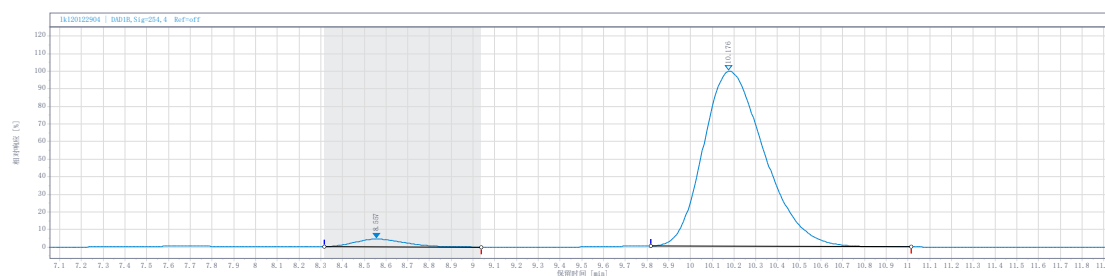

Signal: DAD1B, Sig=254, 4 Ref=off

| RetTime [min] | width [min] | Arer [mAU*s] | Height [mAU] | Area% |
|---------------|-------------|--------------|--------------|-------|
| 8.56          | 0.72        | 909.10       | 57.00        | 3.45  |
| 10.2          | 1.20        | 25413.98     | 1299.50      | 96.55 |

### 3ak racemic mixture

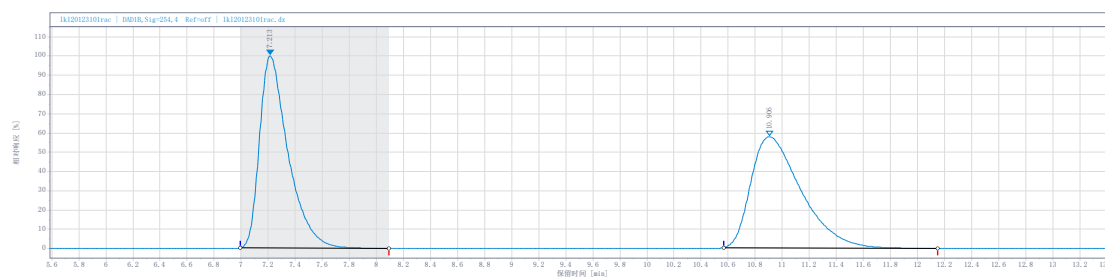

Signal: DAD1B, Sig=254, 4 Ref=off

| RetTime [min] | width [min] | Arer [mAU*s] | Height [mAU] | Area% |
|---------------|-------------|--------------|--------------|-------|
| 7.21          | 1.10        | 5247.31      | 357.93       | 49.56 |
| 10.9          | 1.58        | 5339.42      | 206.87       | 50.44 |

### 3ak

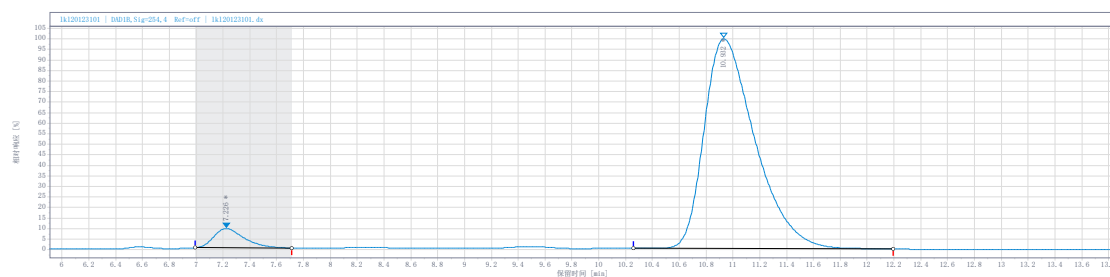

Signal: DAD1B, Sig=254, 4 Ref=off

| RetTime [min] | width [min] | Area [mAU*s] | Height [mAU] | Area% |
|---------------|-------------|--------------|--------------|-------|
| 7.23          | 0.72        | 168.02       | 10.71        | 5.23  |
| 10.9          | 1.94        | 3047.23      | 115.69       | 94.77 |

### 3al racemic mixture

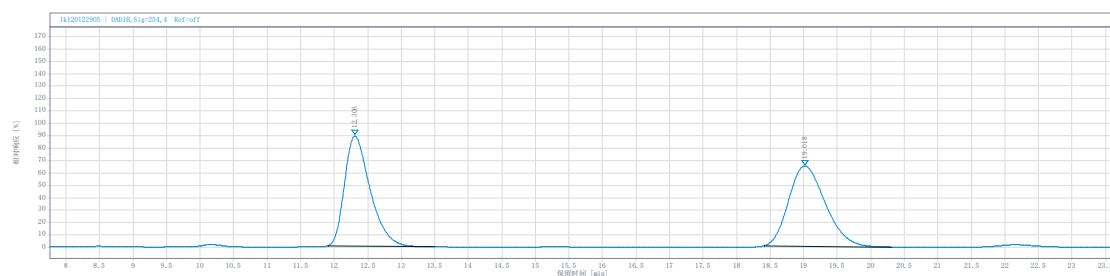

Signal: DAD1B, Sig=254, 4 Ref=off

| RetTime [min] | width [min] | Area [mAU*s] | Height [mAU] | Area% |
|---------------|-------------|--------------|--------------|-------|
| 12.3          | 1.58        | 7627.59      | 287.84       | 49.00 |
| 19.0          | 1.89        | 7939.00      | 209.67       | 51.00 |

### 3al

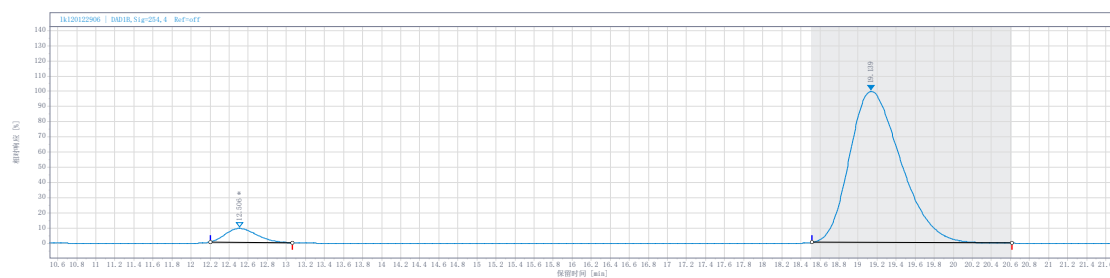

Signal: DAD1B, Sig=254, 4 Ref=off

| RetTime [min] | width [min] | Area [mAU*s] | Height [mAU] | Area% |
|---------------|-------------|--------------|--------------|-------|
| 12.5          | 0.86        | 1111.51      | 49.20        | 5.22  |
| 19.1          | 2.10        | 20195.48     | 540.23       | 94.78 |

### 3am racemic mixture

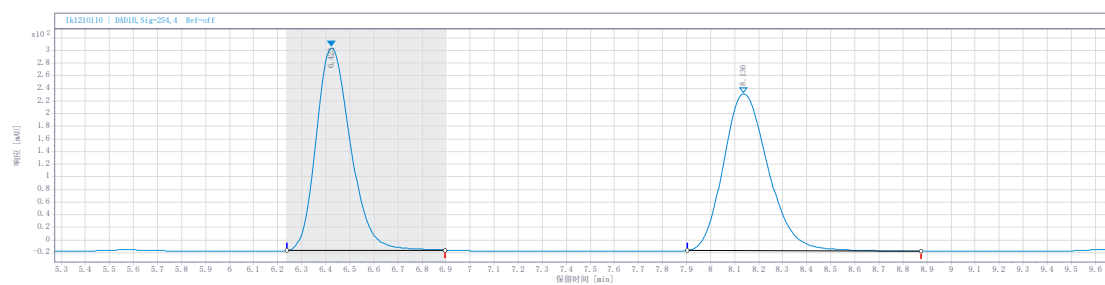

Signal: DAD1B, Sig=254, 4 Ref=off

| RetTime [min] | width [min] | Arer [mAU*s] | Height [mAU] | Area% |
|---------------|-------------|--------------|--------------|-------|
| 6.42          | 0.66        | 3169.88      | 320.75       | 49.70 |
| 8.14          | 0.97        | 3208.48      | 247.80       | 50.30 |

### 3am

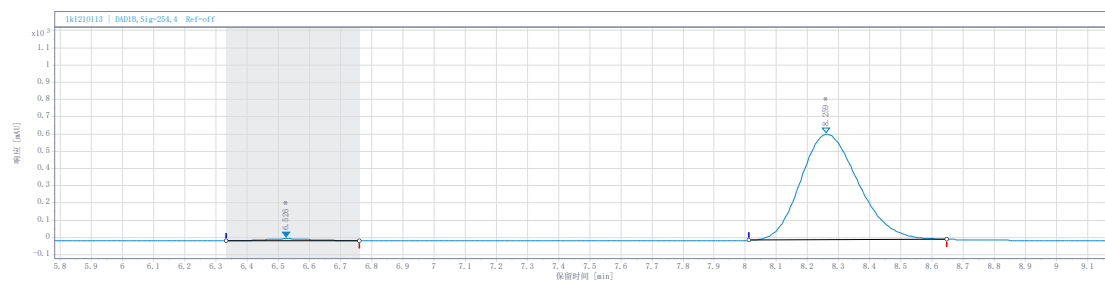

Signal: DAD1B, Sig=254, 4 Ref=off

| RetTime [min] | width [min] | Arer [mAU*s] | Height [mAU] | Area% |
|---------------|-------------|--------------|--------------|-------|
| 6.53          | 0.43        | 100.50       | 10.52        | 1.26  |
| 8.26          | 0.63        | 7873.40      | 612.77       | 98.74 |

### 3am racemic mixture

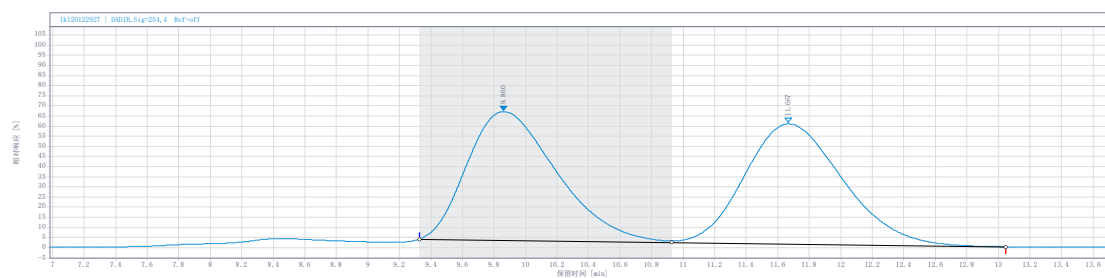

Signal: DAD1B, Sig=254, 4 Ref=off

| RetTime [min] | width [min] | Arer [mAU*s] | Height [mAU] | Area% |
|---------------|-------------|--------------|--------------|-------|
| 9.86          | 1.60        | 5119.65      | 129.61       | 49.49 |
| 11.7          | 2.12        | 5225.39      | 120.95       | 50.51 |

### 3an

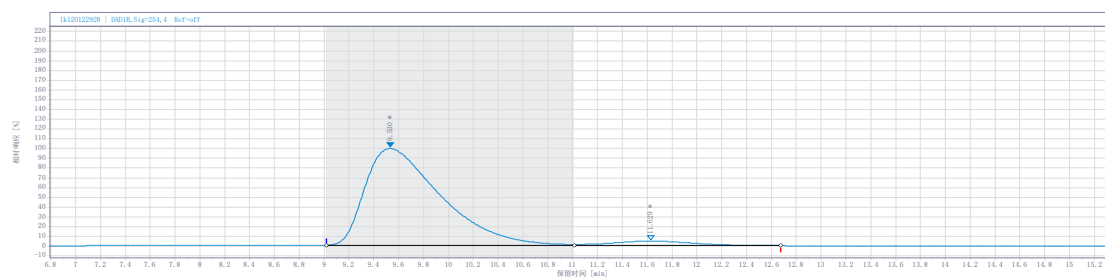

Signal: DAD1B, Sig=254, 4 Ref=off

| RetTime [min] | width [min] | Arer [mAU*s] | Height [mAU] | Area% |
|---------------|-------------|--------------|--------------|-------|
| 9.53          | 2.00        | 36808.10     | 868.71       | 95.26 |
| 11.6          | 1.66        | 1832.96      | 39.94        | 4.74  |

### 3ao racemic mixture

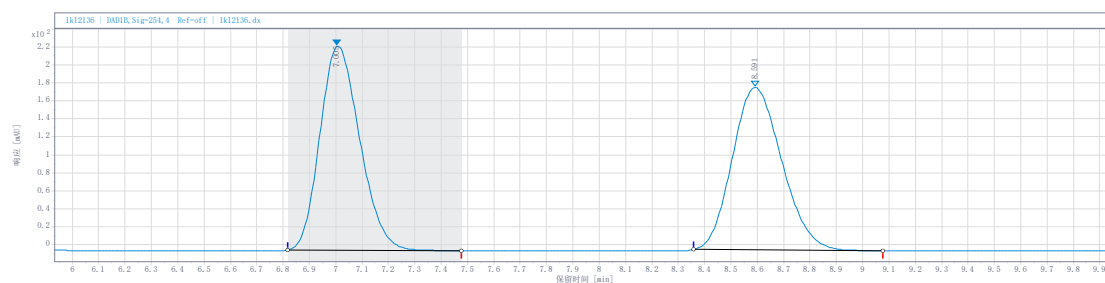

Signal: DAD1B, Sig=254, 4 Ref=off

| RetTime [min] | width [min] | Arer [mAU*s] | Height [mAU] | Area% |
|---------------|-------------|--------------|--------------|-------|
| 7.00          | 0.66        | 2381.33      | 226.59       | 50.24 |
| 8.59          | 0.72        | 2358.41      | 180.71       | 49.76 |

### 3ao

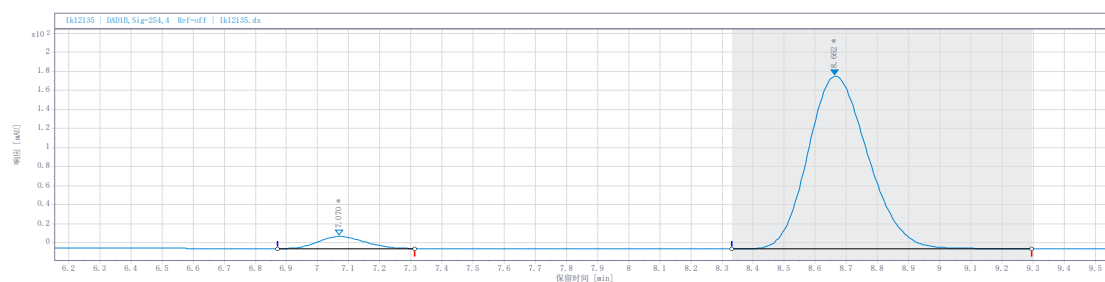

Signal: DAD1B, Sig=254, 4 Ref=off

| RetTime [min] | width [min] | Arer [mAU*s] | Height [mAU] | Area% |
|---------------|-------------|--------------|--------------|-------|
| 7.07          | 0.44        | 132.02       | 12.61        | 5.14  |
| 8.66          | 0.96        | 2434.82      | 181.28       | 94.86 |

### 3ap racemic mixture

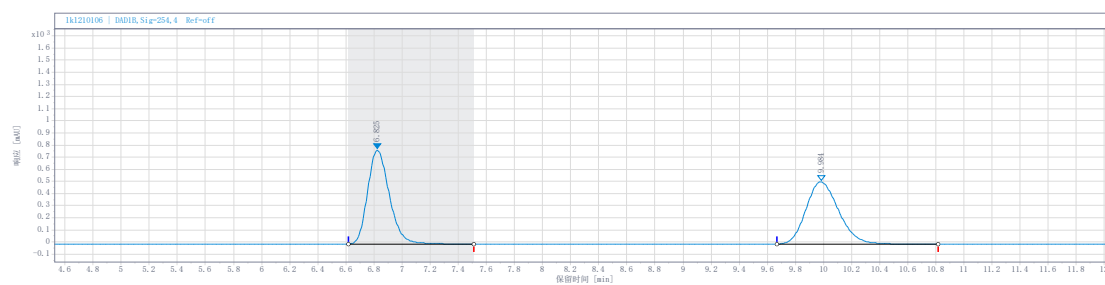

Signal: DAD1B, Sig=254, 4 Ref=off

| RetTime [min] | width [min] | Arer [mAU*s] | Height [mAU] | Area% |
|---------------|-------------|--------------|--------------|-------|
| 6.83          | 0.89        | 8312.70      | 773.24       | 50.01 |
| 9.98          | 1.15        | 8310.37      | 513.60       | 49.99 |

### 3ap

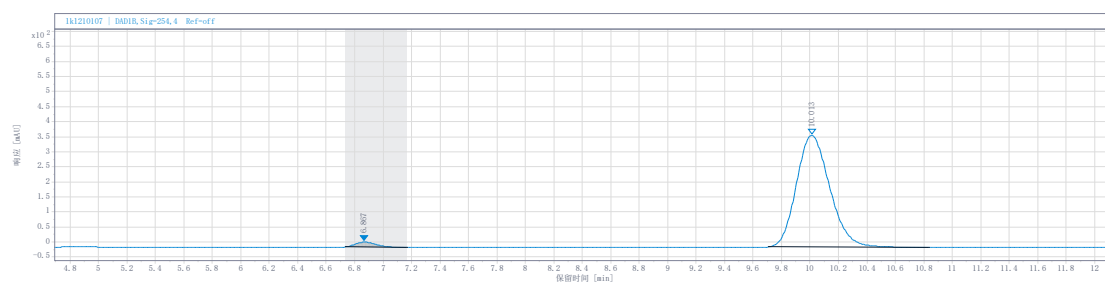

Signal: DAD1B, Sig=254, 4 Ref=off

| RetTime [min] | width [min] | Arer [mAU*s] | Height [mAU] | Area% |
|---------------|-------------|--------------|--------------|-------|
| 6.87          | 0.43        | 166.48       | 16.69        | 2.68  |
| 10.0          | 1.13        | 6052.96      | 371.32       | 97.32 |

### 3aq racemic mixture

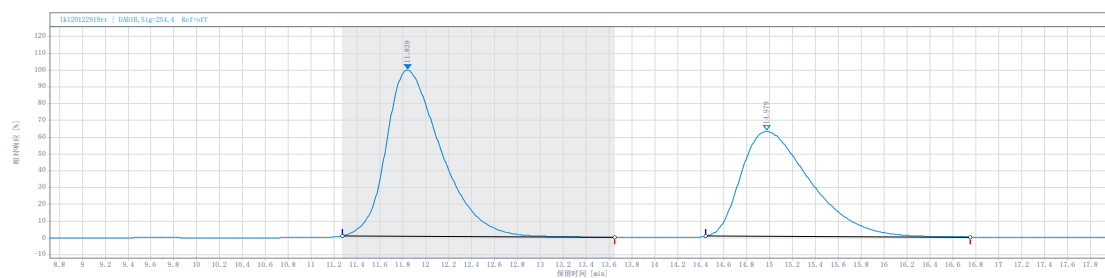

Signal: DAD1B, Sig=254, 4 Ref=off

| RetTime [min] | width [min] | Arer [mAU*s] | Height [mAU] | Area% |
|---------------|-------------|--------------|--------------|-------|
| 11.8          | 2.37        | 12847.20     | 384.24       | 55.69 |
| 15.0          | 2.31        | 10222.45     | 242.52       | 44.31 |

### 3aq

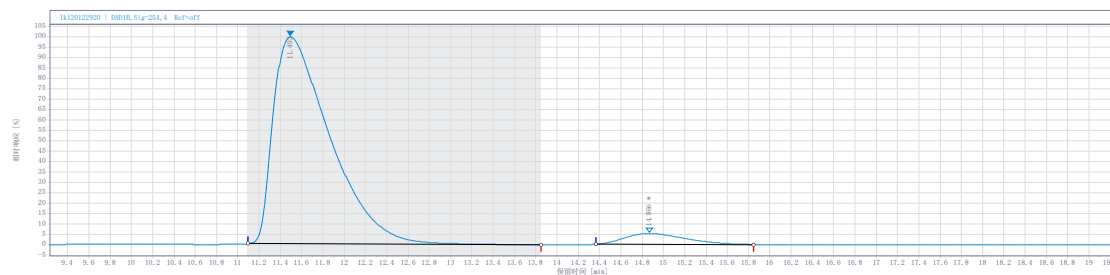

Signal: DAD1B, Sig=254, 4 Ref=off

| RetTime [min] | width [min] | Area [mAU*s] | Height [mAU] | Area% |
|---------------|-------------|--------------|--------------|-------|
| 11.5          | 2.76        | 50759.17     | 1371.15      | 94.77 |
| 14.9          | 1.48        | 2803.46      | 71.15        | 5.23  |

### 3ar racemic mixture

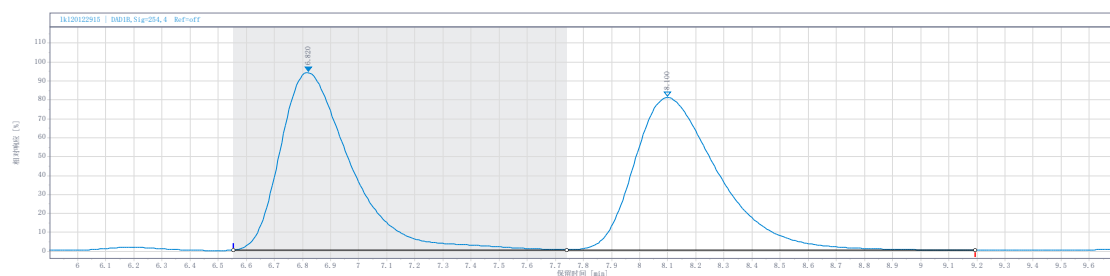

Signal: DAD1B, Sig=254, 4 Ref=off

| RetTime [min] | width [min] | Area [mAU*s] | Height [mAU] | Area% |
|---------------|-------------|--------------|--------------|-------|
| 6.82          | 1.19        | 7417.50      | 426.88       | 49.35 |
| 8.10          | 1.45        | 7613.89      | 366.64       | 50.65 |

### 3ar

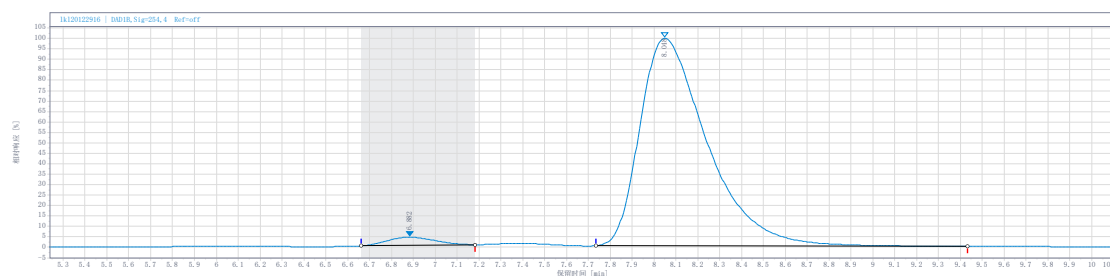

Signal: DAD1B, Sig=254, 4 Ref=off

| RetTime [min] | width [min] | Area [mAU*s] | Height [mAU] | Area% |
|---------------|-------------|--------------|--------------|-------|
| 6.88          | 0.52        | 374.11       | 25.18        | 2.65  |
| 8.05          | 1.70        | 13725.56     | 641.04       | 97.35 |

### 3as racemic mixture

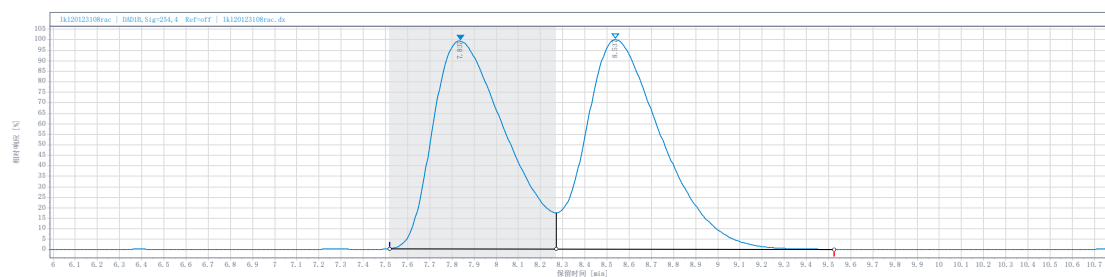

Signal: DAD1B, Sig=254, 4 Ref=off

| RetTime [min] | width [min] | Arer [mAU*s] | Height [mAU] | Area% |
|---------------|-------------|--------------|--------------|-------|
| 7.84          | 0.75        | 11518.47     | 504.81       | 48.59 |
| 8.54          | 1.25        | 12185.36     | 508.26       | 51.41 |

### 3as

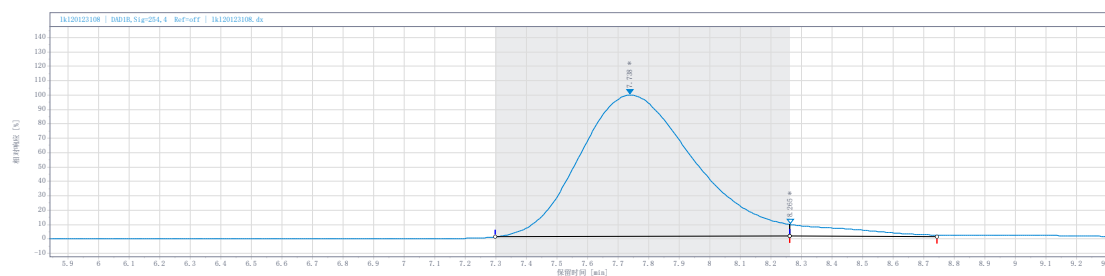

Signal: DAD1B, Sig=254, 4 Ref=off

| RetTime [min] | width [min] | Arer [mAU*s] | Height [mAU] | Area% |
|---------------|-------------|--------------|--------------|-------|
| 7.74          | 0.96        | 6447.74      | 246.40       | 95.67 |
| 8.26          | 0.48        | 292.13       | 19.92        | 4.33  |

### 3at racemic mixture

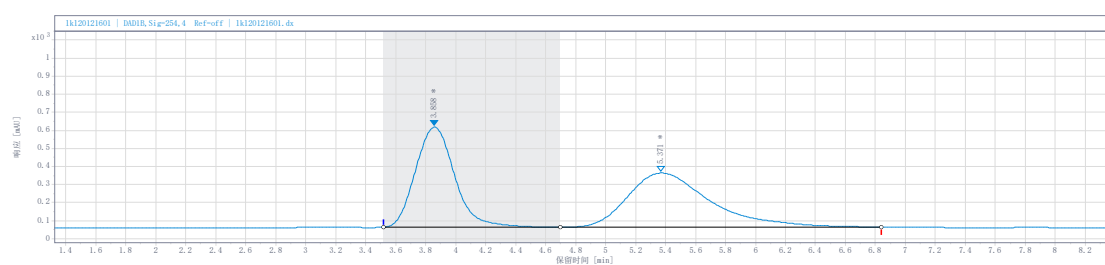

Signal: DAD1B, Sig=254, 4 Ref=off

| RetTime [min] | width [min] | Arer [mAU*s] | Height [mAU] | Area% |
|---------------|-------------|--------------|--------------|-------|
| 3.86          | 1.18        | 10044.41     | 554.77       | 46.75 |
| 5.37          | 2.14        | 11441.20     | 299.93       | 53.25 |



### 3at

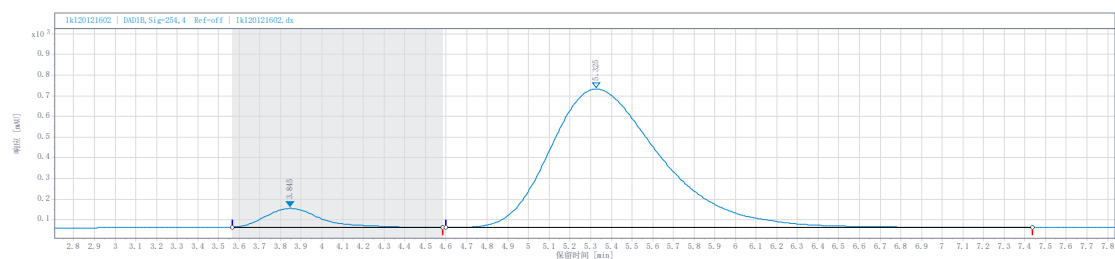

Signal: DAD1B, Sig=254, 4 Ref=off

| RetTime [min] | width [min] | Area [mAU*s] | Height [mAU] | Area% |
|---------------|-------------|--------------|--------------|-------|
| 3.85          | 1.02        | 1697.16      | 91.79        | 6.34  |
| 5.32          | 2.84        | 25077.18     | 670.67       | 93.66 |

### 3au racemic mixture

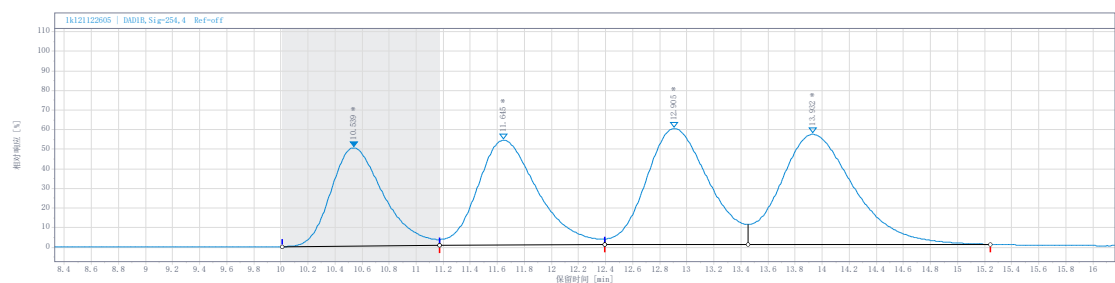

Signal: DAD1B, Sig=254, 4 Ref=off

| RetTime [min] | width [min] | Area [mAU*s] | Height [mAU] | Area% |
|---------------|-------------|--------------|--------------|-------|
| 10.5          | 1.17        | 1138.43      | 41.96        | 19.33 |
| 11.6          | 1.22        | 1385.19      | 44.77        | 23.52 |
| 12.9          | 1.06        | 1587.49      | 49.48        | 26.95 |
| 13.9          | 1.79        | 1778.96      | 46.96        | 30.20 |

### 3au

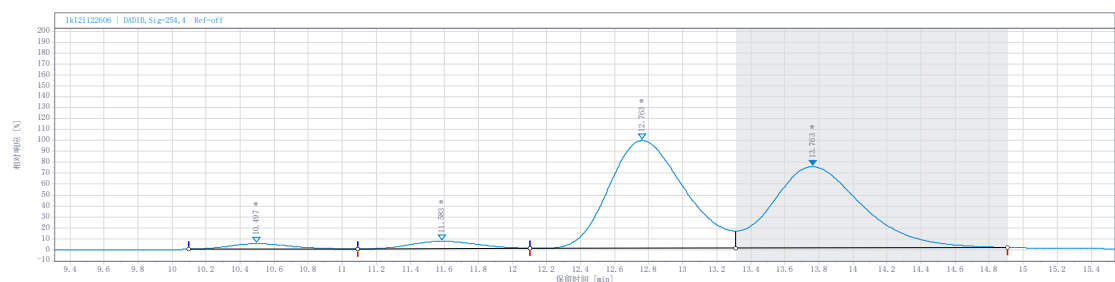

Signal: DAD1B, Sig=254, 4 Ref=off

| RetTime [min] | width [min] | Area [mAU*s] | Height [mAU] | Area% |
|---------------|-------------|--------------|--------------|-------|
| 10.5          | 0.99        | 103.72       | 4.13         | 2.08  |
| 11.6          | 1.01        | 150.04       | 5.59         | 3.01  |
| 12.8          | 1.21        | 2496.18      | 80.74        | 50.07 |
| 13.8          | 1.60        | 2235.66      | 60.93        | 44.84 |

### 3av racemic mixture

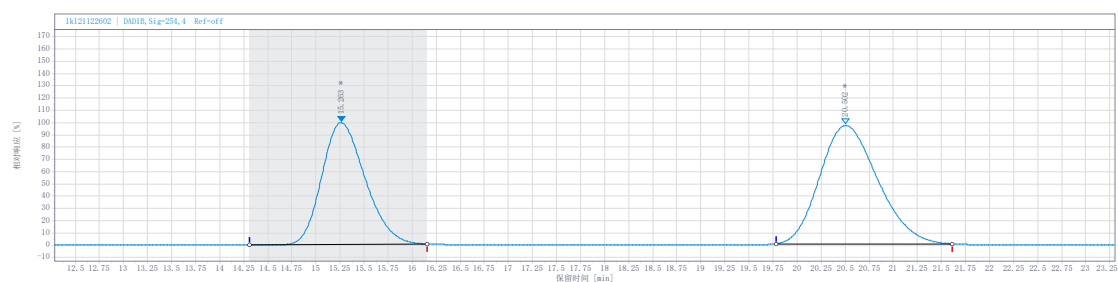

Signal: DAD1B, Sig=254, 4 Ref=off

| RetTime [min] | width [min] | Area [mAU*s] | Height [mAU] | Area% |
|---------------|-------------|--------------|--------------|-------|
| 15.3          | 1.84        | 2073.35      | 66.27        | 43.47 |
| 20.5          | 1.83        | 2696.13      | 64.32        | 56.53 |

### 3av

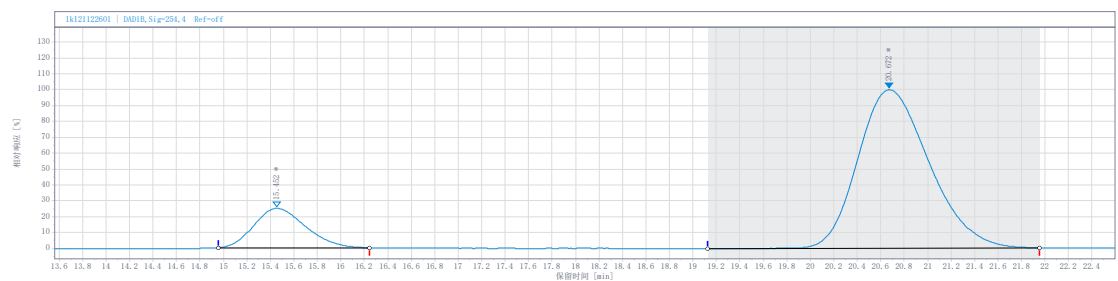

Signal: DAD1B, Sig=254, 4 Ref=off

| RetTime [min] | width [min] | Area [mAU*s] | Height [mAU] | Area% |
|---------------|-------------|--------------|--------------|-------|
| 15.5          | 1.29        | 1115.74      | 36.54        | 15.24 |
| 20.7          | 2.83        | 6205.35      | 146.81       | 84.76 |

### 3ba racemic mixture

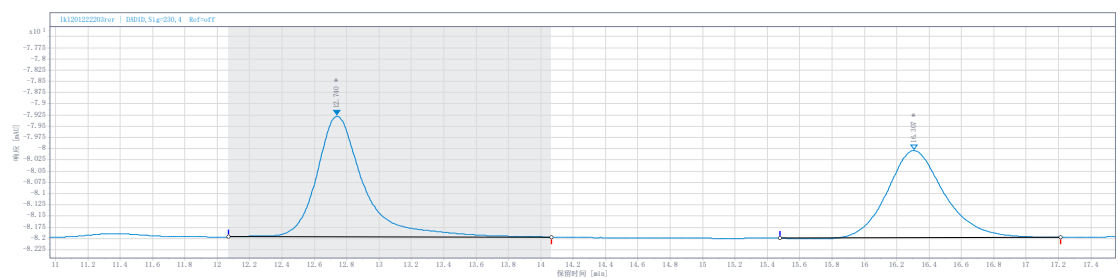

Signal: DAD1D, Sig=230, 4 Ref=off

| RetTime [min] | width [min] | Area [mAU*s] | Height [mAU] | Area% |
|---------------|-------------|--------------|--------------|-------|
| 12.7          | 2.00        | 54.65        | 2.69         | 53.76 |
| 16.3          | 1.74        | 47.01        | 1.94         | 46.24 |

### 3ba

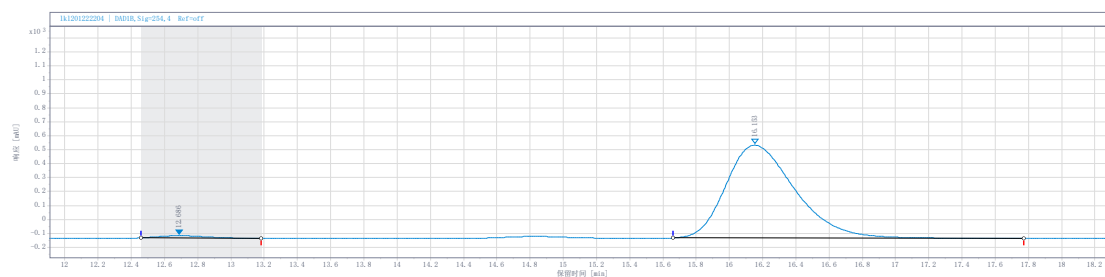

Signal: DAD1B, Sig=254, 4 Ref=off

| RetTime [min] | width [min] | Arer [mAU*s] | Height [mAU] | Area% |
|---------------|-------------|--------------|--------------|-------|
| 12.7          | 0.72        | 302.76       | 16.46        | 1.55  |
| 16.2          | 2.11        | 19246.19     | 666.03       | 98.45 |

### 3bb racemic mixture

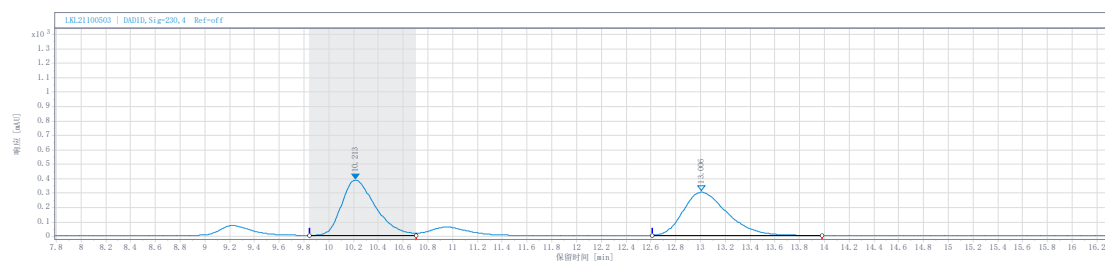

Signal: DAD1D, Sig=230, 4 Ref=off

| RetTime [min] | width [min] | Arer [mAU*s] | Height [mAU] | Area% |
|---------------|-------------|--------------|--------------|-------|
| 10.2          | 0.86        | 7278.34      | 382.08       | 49.82 |
| 13.0          | 1.37        | 7331.95      | 297.66       | 50.18 |

### 3bb

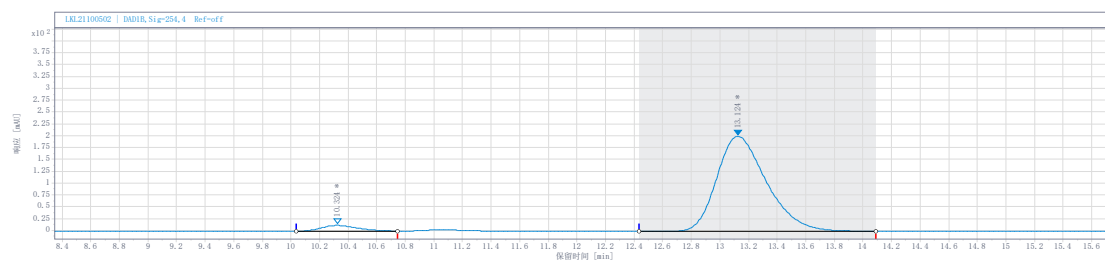

Signal: DAD1B, Sig=254, 4 Ref=off

| RetTime [min] | width [min] | Arer [mAU*s] | Height [mAU] | Area% |
|---------------|-------------|--------------|--------------|-------|
| 10.3          | 0.71        | 212.67       | 12.11        | 4.21  |
| 13.1          | 1.66        | 4841.22      | 200.41       | 95.79 |

### 3bc racemic mixture

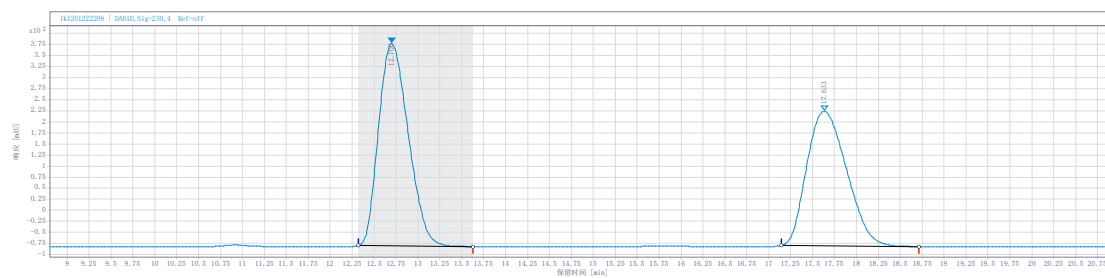

Signal: DAD1D, Sig=230, 4 Ref=off

| RetTime [min] | width [min] | Area [mAU*s] | Height [mAU] | Area% |
|---------------|-------------|--------------|--------------|-------|
| 12.7          | 1.31        | 10732.60     | 456.90       | 52.85 |
| 17.6          | 1.57        | 9576.20      | 303.49       | 47.15 |

### 3bc

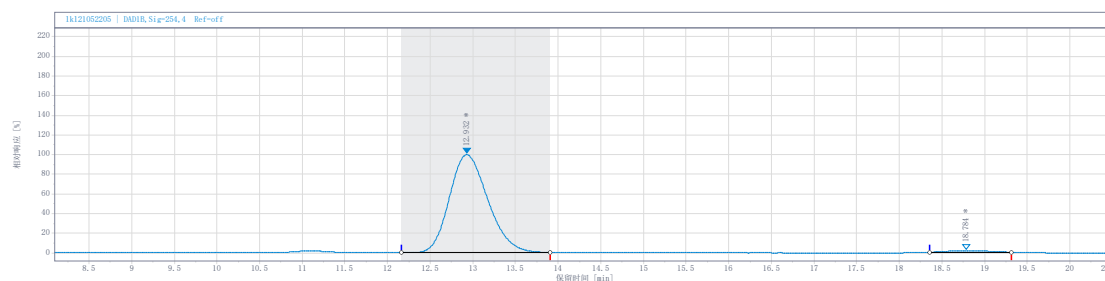

Signal: DAD1B, Sig=254, 4 Ref=off

| RetTime [min] | width [min] | Area [mAU*s] | Height [mAU] | Area% |
|---------------|-------------|--------------|--------------|-------|
| 12.9          | 1.75        | 3314.68      | 105.88       | 98.37 |
| 18.8          | 0.96        | 55.04        | 1.64         | 1.63  |

### 3bd racemic mixture

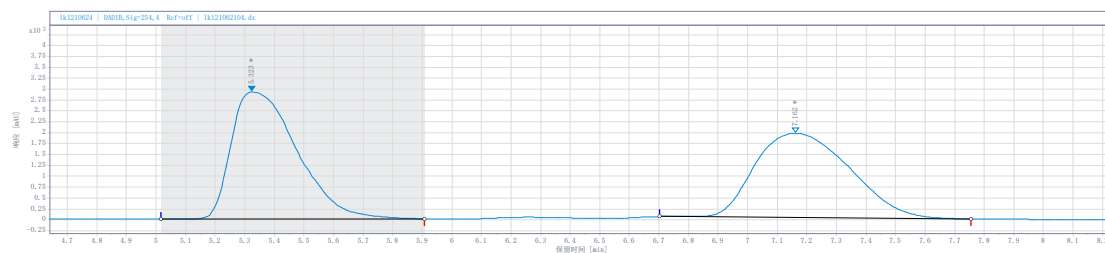

Signal: DAD1B, Sig=254, 4 Ref=off

| RetTime [min] | width [min] | Area [mAU*s] | Height [mAU] | Area% |
|---------------|-------------|--------------|--------------|-------|
| 5.32          | 0.89        | 45008.95     | 2912.86      | 51.02 |
| 7.16          | 1.05        | 43203.53     | 1935.68      | 48.98 |

### 3bd

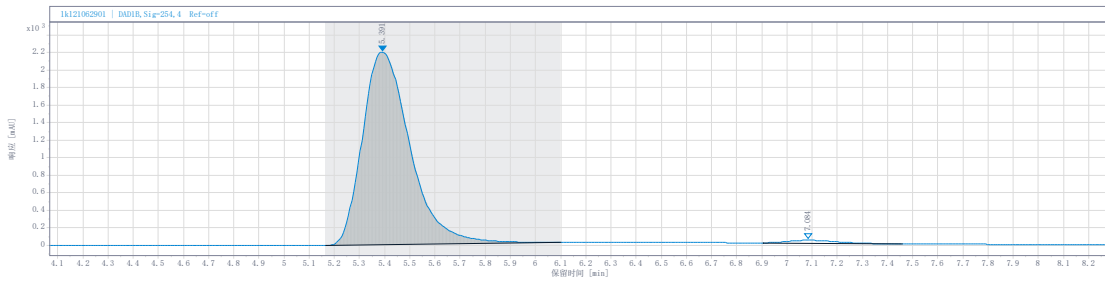

Signal: DAD1B, Sig=254, 4 Ref=off

| RetTime [min] | width [min] | Arer [mAU*s] | Height [mAU] | Area% |
|---------------|-------------|--------------|--------------|-------|
| 5.39          | 0.93        | 28856.16     | 2194.57      | 98.42 |
| 7.08          | 0.55        | 462.69       | 34.09        | 1.58  |

### 3be racemic mixture

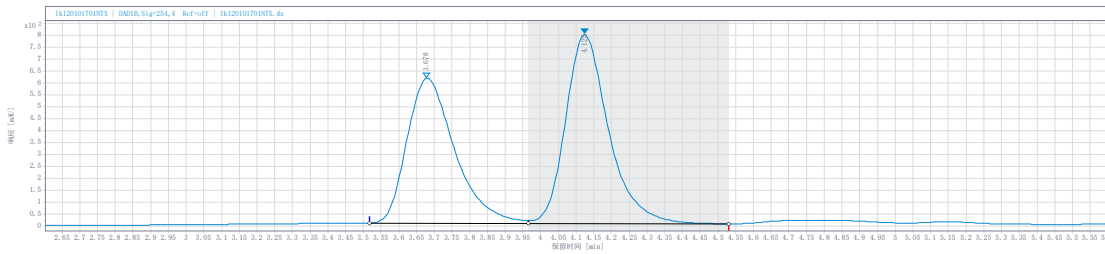

Signal: DAD1B, Sig=254, 4 Ref=off

| RetTime [min] | width [min] | Arer [mAU*s] | Height [mAU] | Area% |
|---------------|-------------|--------------|--------------|-------|
| 3.68          | 0.45        | 5701.43      | 606.13       | 46.05 |
| 4.12          | 0.57        | 6678.81      | 790.78       | 53.95 |

### 3be

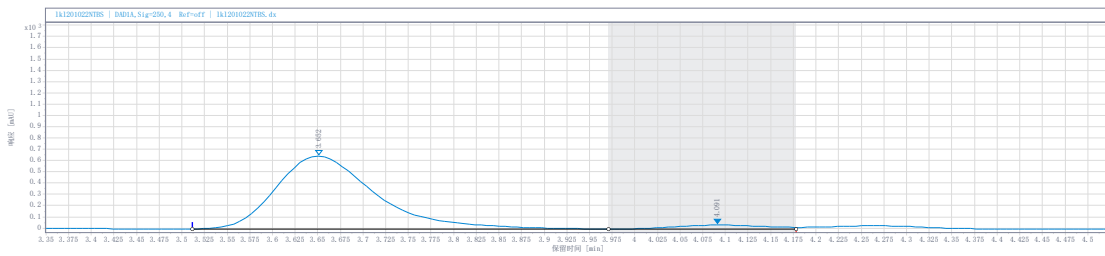

Signal: DAD1A, Sig=250, 4 Ref=off

| RetTime [min] | width [min] | Arer [mAU*s] | Height [mAU] | Area% |
|---------------|-------------|--------------|--------------|-------|
| 3.65          | 0.46        | 4938.90      | 644.33       | 94.88 |
| 4.09          | 0.21        | 266.59       | 37.48        | 5.12  |

### 3bf racemic mixture

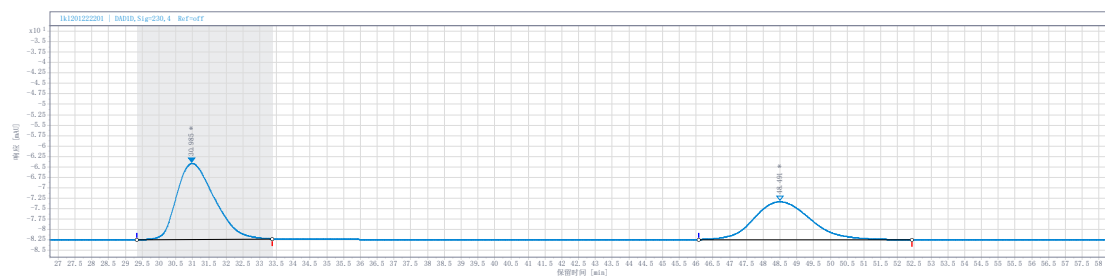

Signal: DAD1D, Sig=230, 4 Ref=off

| RetTime [min] | width [min] | Area [mAU*s] | Height [mAU] | Area% |
|---------------|-------------|--------------|--------------|-------|
| 31.0          | 4.03        | 1410.77      | 18.18        | 57.13 |
| 48.5          | 6.36        | 1058.84      | 9.06         | 42.87 |

### 3bf

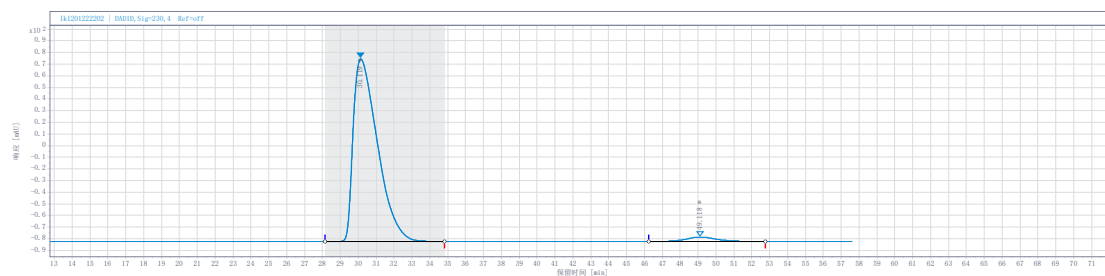

Signal: DAD1D, Sig=230, 4 Ref=off

| RetTime [min] | width [min] | Area [mAU*s] | Height [mAU] | Area% |
|---------------|-------------|--------------|--------------|-------|
| 30.1          | 6.69        | 14789.58     | 156.88       | 97.01 |
| 49.1          | 6.54        | 455.72       | 3.83         | 2.99  |

### 3bg racemic mixture

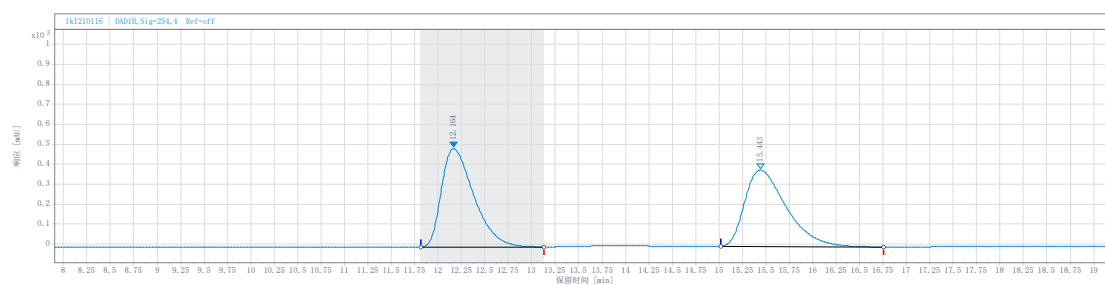

Signal: DAD1B, Sig=254, 4 Ref=off

| RetTime [min] | width [min] | Area [mAU*s] | Height [mAU] | Area% |
|---------------|-------------|--------------|--------------|-------|
| 12.2          | 1.31        | 11843.44     | 493.20       | 50.06 |
| 15.4          | 1.74        | 11817.40     | 382.76       | 49.94 |

### 3bg

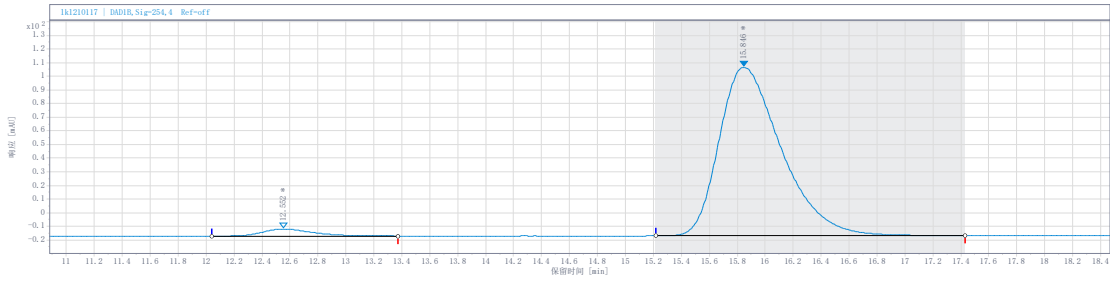

Signal: DAD1B, Sig=254, 4 Ref=off

| RetTime [min] | width [min] | Area [mAU*s] | Height [mAU] | Area% |
|---------------|-------------|--------------|--------------|-------|
| 12.6          | 1.33        | 124.89       | 5.12         | 3.16  |
| 15.8          | 2.21        | 3825.73      | 123.54       | 96.84 |

### 3bh racemic mixture

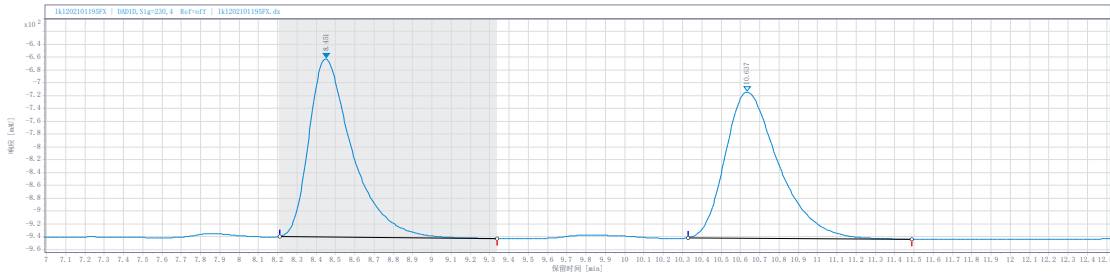

Signal: DAD1D, Sig=230, 4 Ref=off

| RetTime [min] | width [min] | Area [mAU*s] | Height [mAU] | Area% |
|---------------|-------------|--------------|--------------|-------|
| 8.45          | 1.13        | 4357.24      | 277.79       | 49.82 |
| 10.6          | 1.16        | 4388.90      | 227.56       | 50.18 |

### 3bh

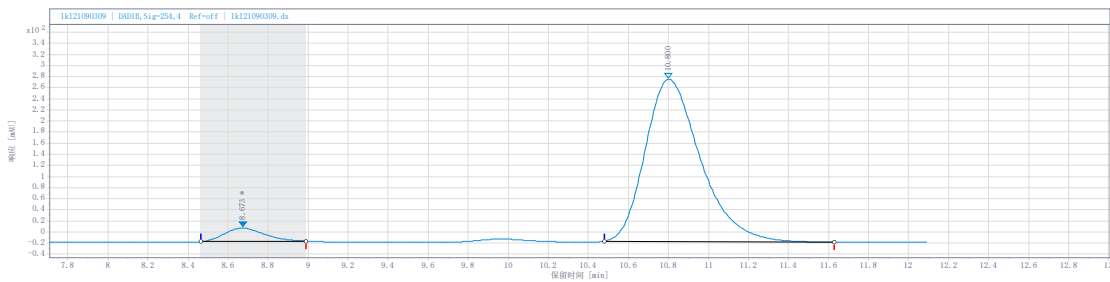

Signal: DAD1B, Sig=254, 4 Ref=off

| RetTime [min] | width [min] | Area [mAU*s] | Height [mAU] | Area% |
|---------------|-------------|--------------|--------------|-------|
| 8.67          | 0.43        | 276.63       | 22.10        | 4.71  |
| 10.8          | 1.15        | 5596.22      | 292.22       | 95.29 |

### 3bi racemic mixture

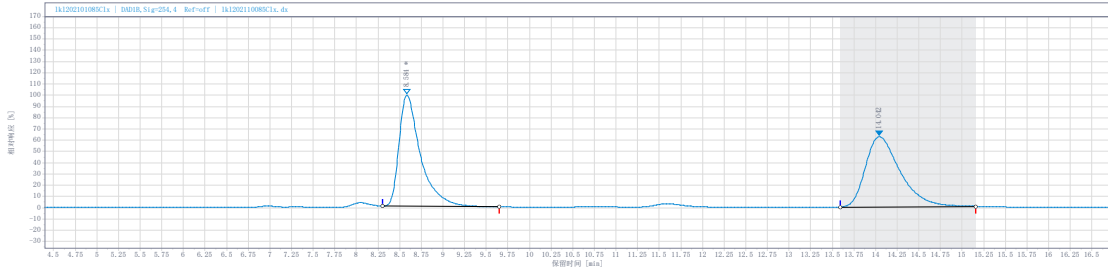

Signal: DAD1B, Sig=254, 4 Ref=off

| RetTime [min] | width [min] | Arer [mAU*s] | Height [mAU] | Area% |
|---------------|-------------|--------------|--------------|-------|
| 8.58          | 1.35        | 17150.17     | 993.93       | 49.57 |
| 14.0          | 1.57        | 17447.65     | 627.26       | 50.43 |

### 3bi

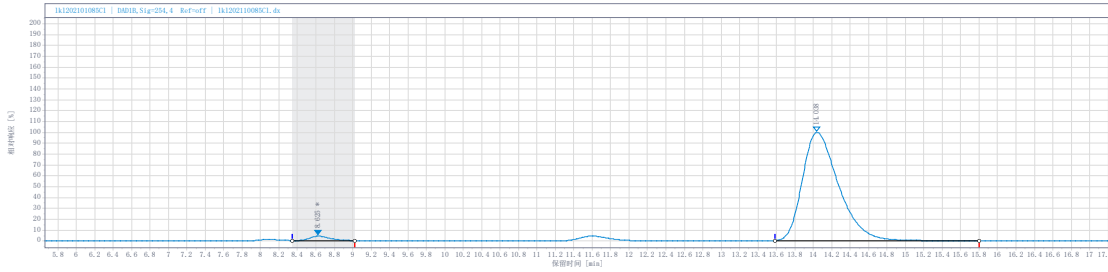

Signal: DAD1B, Sig=254, 4 Ref=off

| RetTime [min] | width [min] | Arer [mAU*s] | Height [mAU] | Area% |
|---------------|-------------|--------------|--------------|-------|
| 8.63          | 0.67        | 399.41       | 26.53        | 2.20  |
| 14.0          | 2.21        | 17746.90     | 648.40       | 97.80 |

### 3bj racemic mixture

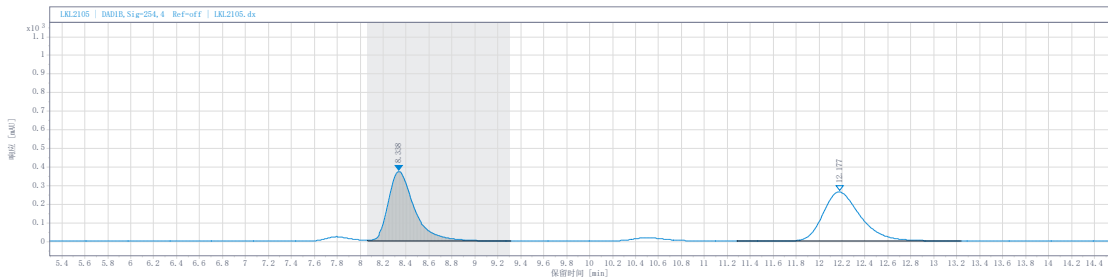

Signal: DAD1B, Sig=254, 4 Ref=off

| RetTime [min] | width [min] | Arer [mAU*s] | Height [mAU] | Area% |
|---------------|-------------|--------------|--------------|-------|
| 8.34          | 1.24        | 5768.02      | 372.36       | 49.25 |
| 12.2          | 1.95        | 5944.10      | 263.84       | 50.75 |

### 3bj



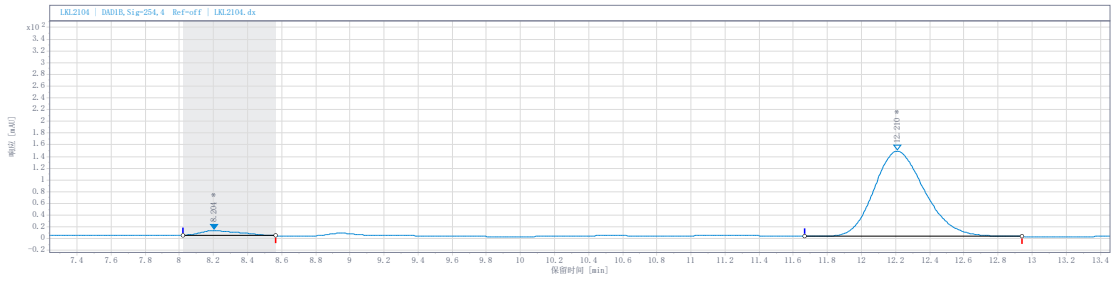

Signal: DAD1B, Sig=254, 4 Ref=off

| RetTime [min] | width [min] | Area [mAU*s] | Height [mAU] | Area% |
|---------------|-------------|--------------|--------------|-------|
| 8.20          | 0.55        | 107.37       | 7.66         | 3.48  |
| 12.2          | 1.28        | 2979.55      | 144.81       | 96.52 |

### 3bk racemic mixture

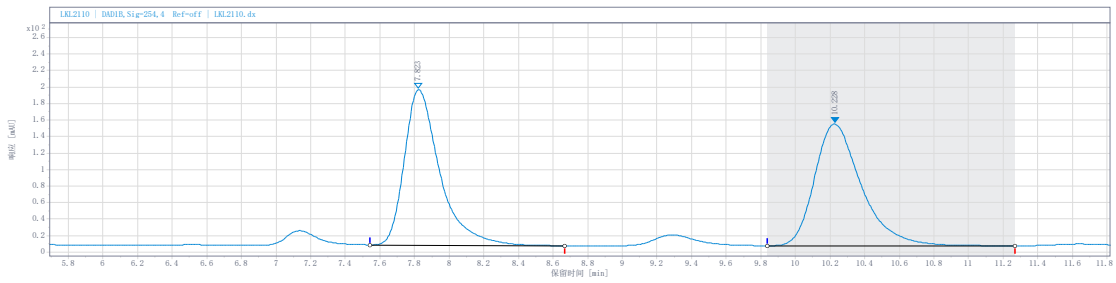

Signal: DAD1B, Sig=254, 4 Ref=off

| RetTime [min] | width [min] | Area [mAU*s] | Height [mAU] | Area% |
|---------------|-------------|--------------|--------------|-------|
| 7.82          | 1.13        | 2687.03      | 188.46       | 49.22 |
| 10.2          | 1.43        | 2772.28      | 147.42       | 50.78 |

### 3bk

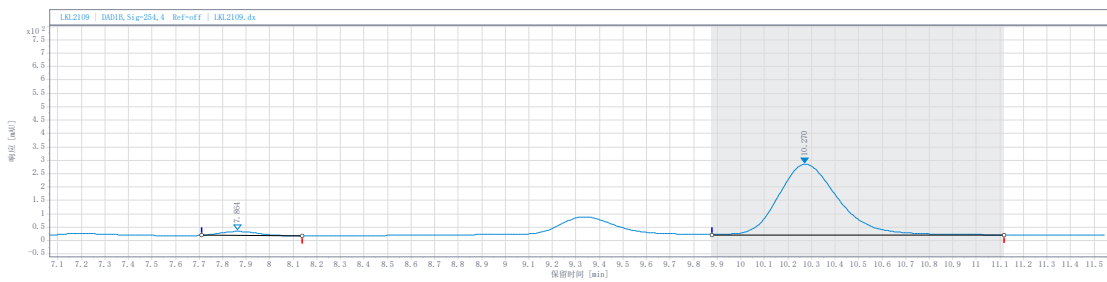

Signal: DAD1B, Sig=254, 4 Ref=off

| RetTime [min] | width [min] | Area [mAU*s] | Height [mAU] | Area% |
|---------------|-------------|--------------|--------------|-------|
| 7.86          | 0.43        | 166.88       | 15.03        | 3.43  |
| 10.3          | 1.24        | 4698.77      | 264.67       | 96.57 |

### 3bl racemic mixture

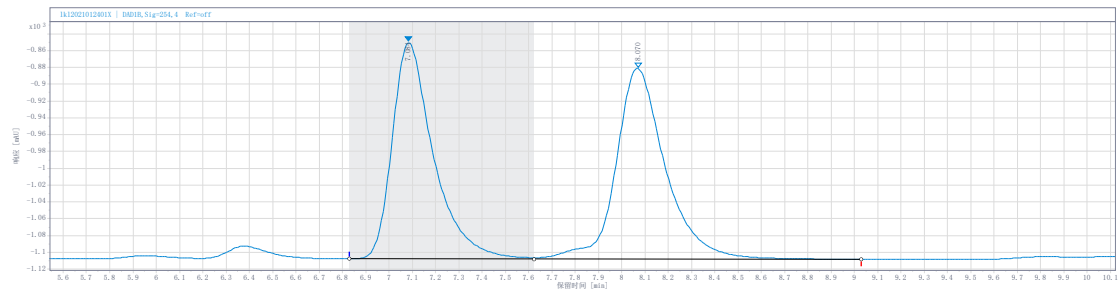

Signal: DAD1B, Sig=254, 4 Ref=off

| RetTime [min] | width [min] | Arer [mAU*s] | Height [mAU] | Area% |
|---------------|-------------|--------------|--------------|-------|
| 7.08          | 0.79        | 3171.54      | 257.10       | 48.63 |
| 8.07          | 1.41        | 3350.15      | 226.69       | 51.37 |

### 3bl

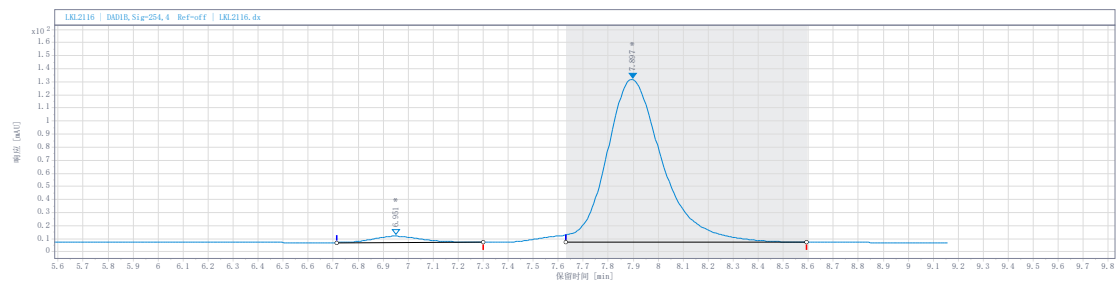

Signal: DAD1B, Sig=254, 4 Ref=off

| RetTime [min] | width [min] | Arer [mAU*s] | Height [mAU] | Area% |
|---------------|-------------|--------------|--------------|-------|
| 6.95          | 0.59        | 63.51        | 4.75         | 3.18  |
| 7.90          | 0.96        | 1932.46      | 124.55       | 96.82 |

### 3bm racemic mixture

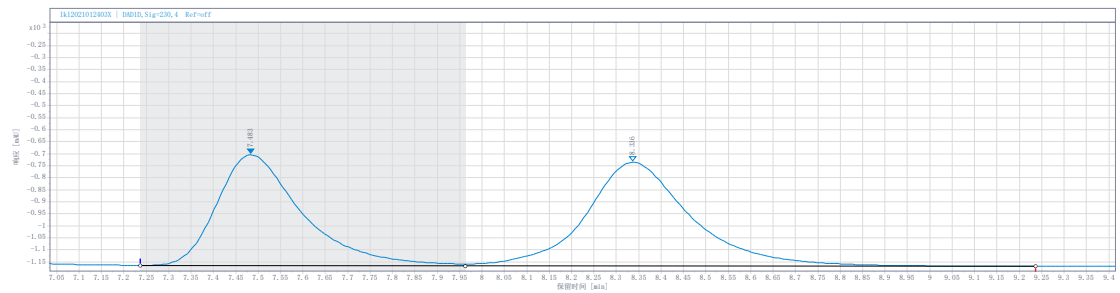

Signal: DAD1B, Sig=254, 4 Ref=off

| RetTime [min] | width [min] | Arer [mAU*s] | Height [mAU] | Area% |
|---------------|-------------|--------------|--------------|-------|
| 7.48          | 0.68        | 2584.49      | 195.45       | 43.99 |
| 8.34          | 1.31        | 3290.78      | 189.98       | 56.01 |

### 3bm

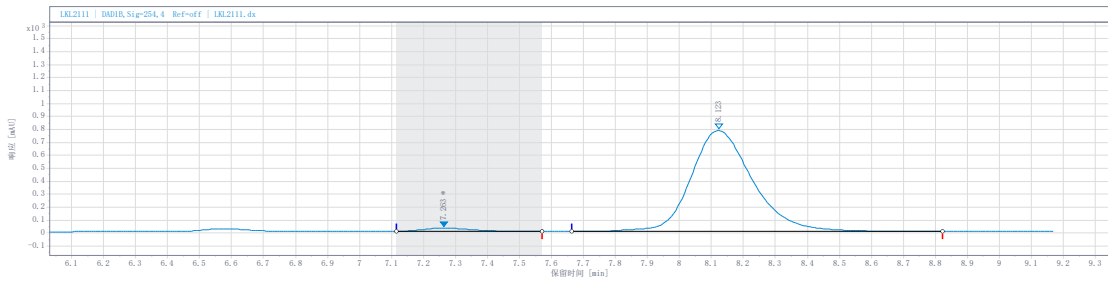

Signal: DAD1B, Sig=254, 4 Ref=off

| RetTime [min] | width [min] | Arer [mAU*s] | Height [mAU] | Area% |
|---------------|-------------|--------------|--------------|-------|
| 7.26          | 0.46        | 277.24       | 25.75        | 2.58  |
| 8.12          | 1.16        | 10466.02     | 779.08       | 97.42 |

### 3bn racemic mixture

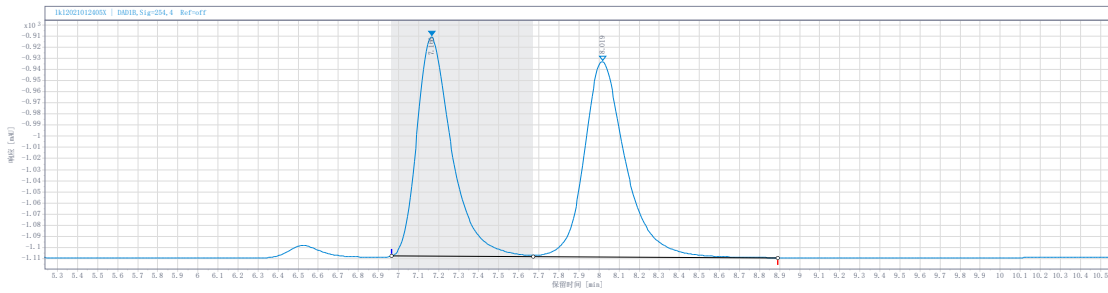

Signal: DAD1B, Sig=254, 4 Ref=off

| RetTime [min] | width [min] | Arer [mAU*s] | Height [mAU] | Area% |
|---------------|-------------|--------------|--------------|-------|
| 7.17          | 0.71        | 2382.27      | 196.80       | 48.60 |
| 8.02          | 1.22        | 2519.90      | 175.33       | 51.40 |

### 3bn

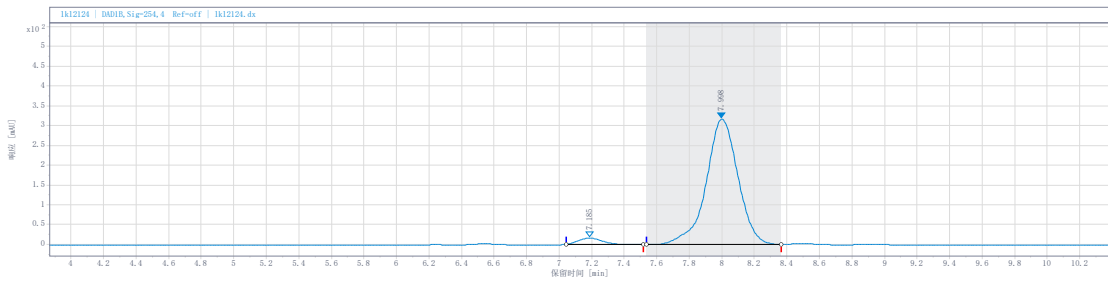

Signal: DAD1B, Sig=254, 4 Ref=off

| RetTime [min] | width [min] | Arer [mAU*s] | Height [mAU] | Area% |
|---------------|-------------|--------------|--------------|-------|
| 7.19          | 0.47        | 160.25       | 15.84        | 3.59  |
| 8.00          | 0.83        | 4305.52      | 316.36       | 96.41 |

### 3bo racemic mixture

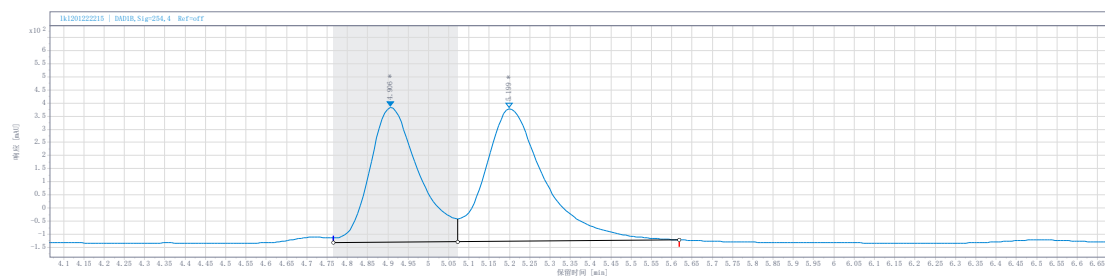

Signal: DAD1B, Sig=254, 4 Ref=off

| RetTime [min] | width [min] | Arer [mAU*s] | Height [mAU] | Area% |
|---------------|-------------|--------------|--------------|-------|
| 4.91          | 0.31        | 4360.41      | 513.13       | 45.74 |
| 5.20          | 0.54        | 5172.09      | 503.91       | 54.26 |

### 3bo

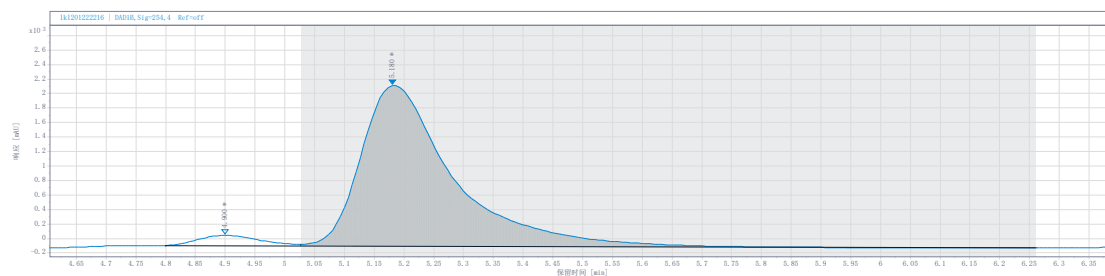

Signal: DAD1B, Sig=254, 4 Ref=off

| RetTime [min] | width [min] | Arer [mAU*s] | Height [mAU] | Area% |
|---------------|-------------|--------------|--------------|-------|
| 4.90          | 0.23        | 1043.71      | 144.67       | 4.17  |
| 5.18          | 1.23        | 23963.36     | 2219.31      | 95.83 |

### 3aa(Gram scale)

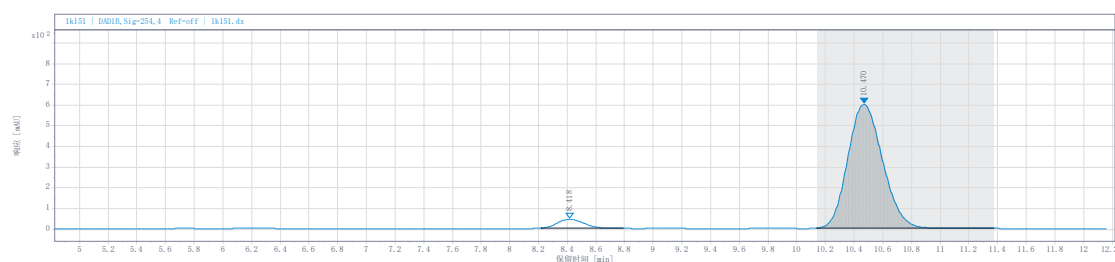

Signal: DAD1B, Sig=254, 4 Ref=off

| RetTime [min] | width [min] | Arer [mAU*s] | Height [mAU] | Area% |
|---------------|-------------|--------------|--------------|-------|
| 8.42          | 0.57        | 554.92       | 43.45        | 5.22  |
| 10.5          | 1.23        | 10070.06     | 598.07       | 94.78 |

### 3ba(Gram scale)

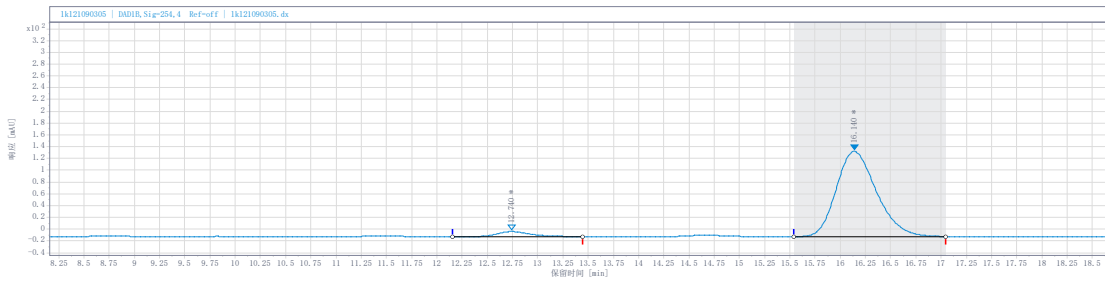

Signal: DAD1B, Sig=254, 4 Ref=off

| RetTime [min] | width [min] | Arer [mAU*s] | Height [mAU] | Area% |
|---------------|-------------|--------------|--------------|-------|
| 12.7          | 1.29        | 186.93       | 8.46         | 4.46  |
| 16.1          | 1.51        | 3999.89      | 144.35       | 95.54 |

### 4a racemic mixture

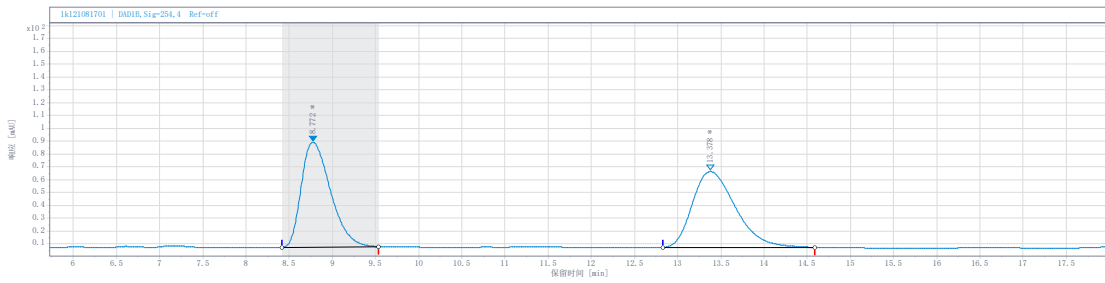

Signal: DAD1B, Sig=254, 4 Ref=off

| RetTime [min] | width [min] | Arer [mAU*s] | Height [mAU] | Area% |
|---------------|-------------|--------------|--------------|-------|
| 8.77          | 1.13        | 1919.82      | 81.73        | 48.40 |
| 13.4          | 1.75        | 2046.73      | 59.13        | 51.60 |

### 4a

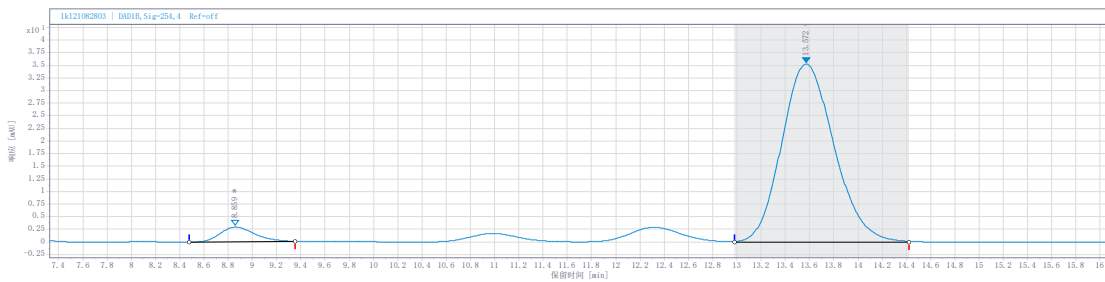

Signal: DAD1B, Sig=254, 4 Ref=off

| RetTime [min] | width [min] | Arer [mAU*s] | Height [mAU] | Area% |
|---------------|-------------|--------------|--------------|-------|
| 8.86          | 0.87        | 57.21        | 2.92         | 5.12  |
| 13.6          | 1.44        | 1061.22      | 35.29        | 94.88 |

### 4b racemic mixture

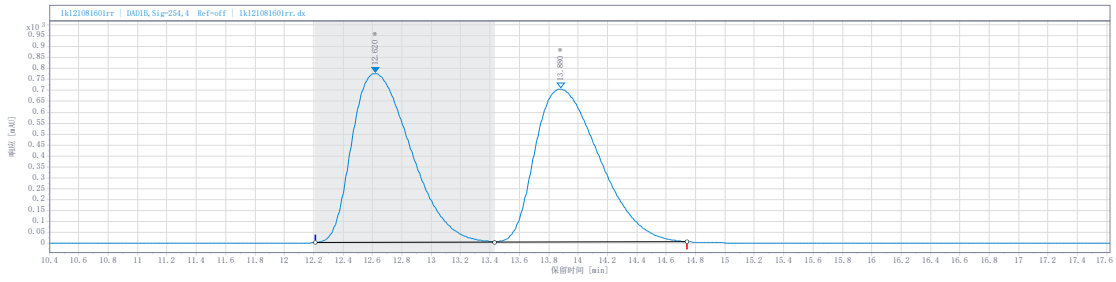

Signal: DAD1B, Sig=254, 4 Ref=off

| RetTime [min] | width [min] | Arer [mAU*s] | Height [mAU] | Area% |
|---------------|-------------|--------------|--------------|-------|
| 12.6          | 1.22        | 21507.29     | 773.21       | 50.20 |
| 13.9          | 1.31        | 21338.33     | 699.83       | 49.80 |

4b

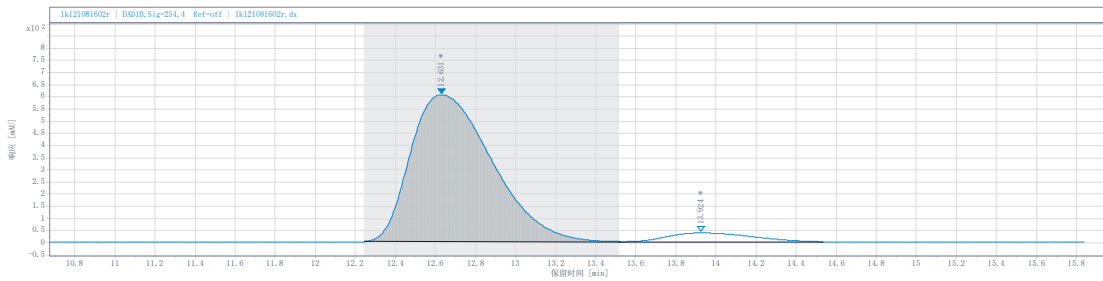

Signal: DAD1B, Sig=254, 4 Ref=off

| RetTime [min] | width [min] | Arer [mAU*s] | Height [mAU] | Area% |
|---------------|-------------|--------------|--------------|-------|
| 12.6          | 1.27        | 17034.34     | 603.47       | 94.82 |
| 13.9          | 1.02        | 931.03       | 34.69        | 5.18  |

4c racemic mixture

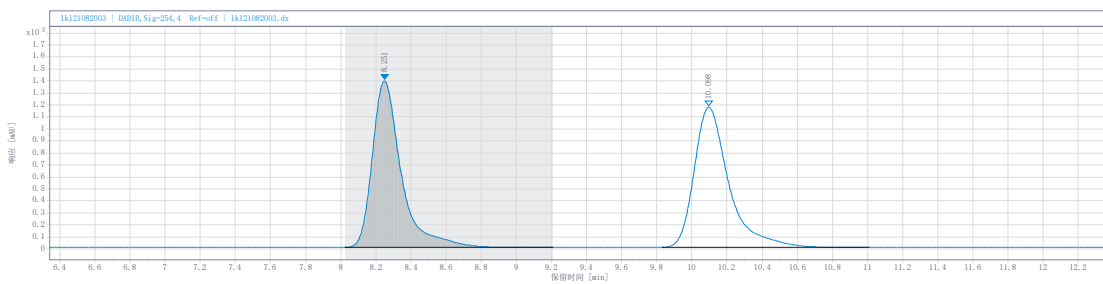

Signal: DAD1B, Sig=254, 4 Ref=off

| RetTime [min] | width [min] | Arer [mAU*s] | Height [mAU] | Area% |
|---------------|-------------|--------------|--------------|-------|
| 8.25          | 1.18        | 15800.84     | 1387.88      | 49.64 |
| 10.1          | 1.17        | 16030.98     | 1167.69      | 50.36 |

4c

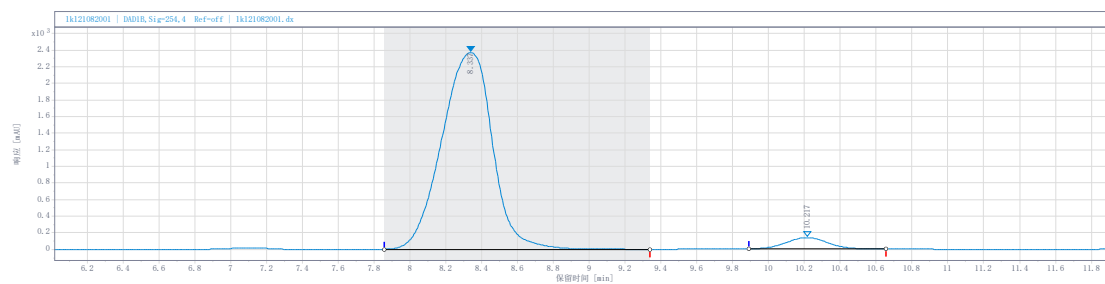

**Signal:** DAD1B, Sig=254, 4 Ref=off

| RetTime [min] | width [min] | Area [mAU*s] | Height [mAU] | Area% |
|---------------|-------------|--------------|--------------|-------|
| 8.34          | 1.48        | 46465.59     | 2368.52      | 95.44 |
| 10.2          | 0.77        | 2220.15      | 137.11       | 4.56  |
